# Supplementary material for: Integrated analysis of telomerase enzymatic activity unravels an association with cancer stemness and proliferation
Source: Nat Commun. 2021 Jan 8;12:139. doi: 10.1038/s41467-020-20474-9 (PMC7794223; doi:10.1038/s41467-020-20474-9)
Supplement: Supplementary file 4 — Supplementary Data 1 [file 41467_2020_20474_MOESM4_ESM.xlsx]

## Sheet: Supp Data 1
Supplementary Data 1
Gene	Alt Name	Ensemble ID	Full Name (Official Name)	Chr	Close to TERT?	Expression Correlation with TERT in IDHmut LGG	Tissue Specificity (GTEx)	Function
TERT	TP2; TRT; CMM9; EST2; TCS1; hTRT; DKCA2; DKCB4; hEST2; PFBMFT1	ENSG00000164362	telomerase reverse transcriptase	5	N/A	1	High in testis, overall low in other tissues	Telomerase reverse transcriptase, encoding enzymatic subunit of the telomerase complex.
TERC	TR; hTR; TRC3; DKCA1; PFBMFT2; SCARNA19	ENSG00000270141	telomerase RNA component	3	N/A	0.137335	High in testis, overall low in other tissues	RNA component of telomerase complex
HELLS	LSH; ICF4; PASG; SMARCA6; Nbla10143	ENSG00000119969	helicase, lymphoid specific	10	N/A	0.751848	High in testis, low in most other tissues	Helicase, maybe lymphoid specific. Mutation leads to ICF syndrome (PMID: 26216346), a genetic disease featuring short telomeres.
LIN9	TGS; BARA; TGS1; TGS2; Lin-9; BARPsv	ENSG00000183814	lin-9 DREAM MuvB core complex component	1	N/A	0.679628	Broad expression in testis, heart and 24 other tissues	A tumor suppressor encoding gene which inhibits oncogenic transformation and DNA synthesis by associating with retinoblastoma 1 protein.
C18orf54	LAS2	ENSG00000166845	chromosome 18 open reading frame 54	18	N/A	0.652284	Broad expression in testis, placenta and 15 other tissues	Loss of gene has relation with lung adenocarcinoma cell line.
CCT6P1	CCT6-5P; CCT6AP1	ENSG00000228409	chaperonin containing TCP1 subunit 6 pseudogene 1	7	N/A	0.651427	Ubiquitous expression	Peudogene, function unclear
CEP72	FLJ10565, KIAA1519	ENSG00000112877	centrosomal protein 72	5	yes	0.645887	High in testis, detectable in other tissues	centromere binding, may involved in microtube regulation.
POLE2	DPE2	ENSG00000100479	DNA polymerase epsilon 2, accessory subunit	14	N/A	0.642437	High in testis, detectable in some tissues but low in most	Epsilon subunit of DNA polymerase, may be involved in telomere c-strand synthesis.
C21orf81	ANKRD20A11P	ENSG00000215559	ankyrin repeat domain 20 family member A11,pseudogene	21	N/A	0.641048	Low in most tissues. High in esophagus mucosa.	Function unknown
MCM4	NKCD; CDC21; CDC54; IMD54; NKGCD; hCdc21; P1-CDC21	ENSG00000104738	minichromosome maintenance complex component 4	8	N/A	0.631637	High in testis, broad expression across tissues.	Required for pre-replication complex, may cooeprate with DNA helicases in DNA unwinding. Regulated by Cdk1.
EHMT2	G9A; BAT8; GAT8; NG36; KMT1C; C6orf30	ENSG00000204371	euchromatic histone lysine methyltransferase 2	6	N/A	0.608694	Ubiquitous expression in ovary, testis and 25 other tissues	Plays role in recruitment of epigenetic regulators and transcription repression.
PAXIP1	PTIP; TNRC2; CAGF28; CAGF29; PACIP1; PAXIP1L	ENSG00000157212	PAX interacting protein 1	7	N/A	0.606729	Ubiquitous expression in testis and 25 other tissues	Maintains genomic stability, chromatin condensation and progression via mitosis.
LOC81691	REXO5;AC004381.6	ENSG00000005189	RNA exonuclease 5	16	N/A	0.604413	Testis specific expression	a nuclear RNA exonuclease, may be required for 3' end maturation of several species of non-coding RNA.
Genes	Cor P value	Cor Coefficient (Pearson)	log2FC
TERT	1.31024e-12	1	4.84002
TRIP13	0.685597	0.803008	-0.0942523
C17orf53	0.165323	0.764591	0.143537
POLE	0.749725	0.755659	-0.0780356
HELLS	0.0447902	0.751848	0.373981
C16orf59	0.521187	0.739616	-0.010283
KNTC1	0.701977	0.736185	-0.0746549
BRIP1	0.672713	0.727109	-0.139258
FANCA	0.737747	0.724546	-0.139725
FANCG	0.260486	0.723311	0.0586649
PKMYT1	0.177612	0.723128	0.256907
ORC6L	0.0983666	0.719757	0.226717
CHTF18	0.220404	0.719441	0.134812
EME1	0.981201	0.717843	-0.416229
CDC25A	0.888165	0.705768	-0.233995
DBF4	0.990729	0.701385	-0.272606
RAD51AP1	0.990149	0.699967	-0.560644
NFKBIL2	0.861139	0.693052	-0.262853
RECQL4	0.745077	0.692626	-0.147537
C15orf42	1	0.6861	-0.965662
CENPK	0.205942	0.684962	0.22918
SNORA5A	0.0841907	0.684901	1.14207
ZNF492	0.239061	0.681243	0.150266
RFC3	0.501286	0.680145	-0.000338213
NT5C3	0.00740619	0.679665	0.139159
LIN9	0.00180338	0.679628	0.286382
RAD51	0.991957	0.676889	-0.797247
FANCD2	0.754871	0.675757	-0.155669
XRCC2	0.468049	0.675138	0.0185428
FANCC	0.869391	0.674088	-0.129982
HIST1H2AE	0.93918	0.673196	-0.433693
CHAF1A	0.505849	0.672762	-0.00211366
FANCI	0.428743	0.668821	0.0405902
MGC34034	0.325692	0.667558	1.01557
ADAD1	0.526808	0.667558	-0.117433
AZI1	0.21541	0.666633	0.0736531
C19orf57	0.152183	0.662426	0.12834
GINS1	0.572209	0.662053	-0.0302267
ORC1L	0.999947	0.661523	-1.48708
EZH2	0.947268	0.660348	-0.293441
ZWINT	0.384713	0.658335	0.0574206
LRFN4	0.780654	0.655088	-0.0773769
MCM10	0.947144	0.654457	-0.647039
C12orf48	0.272592	0.654304	0.100152
SNORA5C	0.268718	0.653465	0.709896
C18orf54	0.0339106	0.652284	0.211919
EVX1	0.999994	0.652184	-2.58928
CCT6P1	6.40835e-06	0.651427	0.473513
MCM7	0.572757	0.64656	-0.0230209
RAD54B	0.999999	0.646116	-0.8125
CEP72	4.40717e-08	0.645887	0.412477
GPC2	0.0786021	0.645578	0.202057
NCAPG2	0.940956	0.642454	-0.167495
POLE2	0.00624496	0.642437	0.573645
C21orf81	0.00635338	0.641048	0.758857
ATAD5	0.160544	0.639603	0.153147
ZNF282	0.899135	0.636883	-0.0720701
SOX1	0.114734	0.636452	0.141011
SPATA16	0.288499	0.635515	0.761197
CCDC15	0.939678	0.634408	-0.188849
CDC6	0.970738	0.634334	-0.452939
NVL	0.519465	0.632988	-0.00249889
VRK1	0.896289	0.632939	-0.126486
MCM4	4.70263e-05	0.631637	0.470015
RRM2	0.729524	0.628834	-0.186069
FAM111B	0.774703	0.626579	-0.210247
SGOL1	0.924147	0.625396	-0.497248
KLK14	0.999994	0.624617	-1.17652
MCM5	0.824166	0.62355	-0.0822602
RRP1B	0.574016	0.622842	-0.0102833
EFNA2	0.659664	0.622325	-0.0630507
C5orf34	0.89764	0.621202	-0.208229
DTL	0.290128	0.620619	0.14336
TIMELESS	0.526148	0.618634	-0.0102571
TOP3A	0.146485	0.617999	0.057844
CASP2	0.903317	0.61495	-0.101474
ATXN2L	0.349901	0.614764	0.0178844
PABPC1	0.998134	0.61434	-0.286552
NOP56	0.0966403	0.613493	0.0640164
RFC2	0.997057	0.613475	-0.231889
TROAP	0.963081	0.611132	-0.752654
GSG2	0.916679	0.610985	-0.390938
RFC4	0.525049	0.610065	-0.00672521
CENPM	0.9674	0.609628	-0.396469
SNORD22	0.726335	0.609593	-0.401145
HNRNPA3	0.00399906	0.609455	0.125652
POLA2	0.73629	0.609213	-0.0608883
EHMT2	0.000752775	0.608694	0.169911
CDAN1	0.861526	0.608352	-0.0529206
VAV2	0.999848	0.608183	-0.275776
HDAC2	0.823907	0.607782	-0.0591104
GINS2	0.98397	0.607542	-0.599539
PUS7	0.866125	0.606986	-0.0971078
PAXIP1	0.000592023	0.606729	0.251913
EXO1	0.706154	0.605777	-0.155515
SMEK3P	0.735718	0.605758	-0.820286
PRIM2	0.975611	0.604926	-0.144501
LOC81691	0.000270989	0.604413	0.48265
CDC45	0.809555	0.603933	-0.304647
UNK	0.0582599	0.603818	0.0892519
BUB1	0.841652	0.603545	-0.299739
ILF3	0.731746	0.603176	-0.0252578
FAM72A	0.996777	0.60267	-0.415625
POM121	0.895279	0.602082	-0.0691704
DNMT1	0.0843009	0.602038	0.114017
DOT1L	0.891413	0.601908	-0.142951
ZNF682	0.133056	0.601808	0.0873888
TRIM27	0.999703	0.600463	-0.161996
