# Supplementary material for: Integrated analysis of telomerase enzymatic activity unravels an association with cancer stemness and proliferation
Source: Nat Commun. 2021 Jan 8;12:139. doi: 10.1038/s41467-020-20474-9 (PMC7794223; doi:10.1038/s41467-020-20474-9)
Supplement: Supplementary file 5 — Supplementary Data 2 [file 41467_2020_20474_MOESM5_ESM.xlsx]

## Sheet: Supp. Data 2
Supplementary Data 2
Gene Set Name	# Genes in Gene Set (K)	Description	# Genes in Overlap (k)	k/K	p-value	FDR q-value
GO_CELL_CYCLE	1847	The progression of biochemical and morphological phases and events that occur in a cell during successive cell replication or nuclear replication events. Canonically, the cell cycle comprises the replication and segregation of genetic material followed by the division of the cell, but in endocycles or syncytial cells nuclear replication or nuclear division may not be followed by cell division. [G…	8	0.0043	1.26e-08	0.000195
MARSON_BOUND_BY_E2F4_UNSTIMULATED	682	Genes with promoters bound by E2F4 [GeneID=1874] in unstimulated hybridoma cells.	6	0.0088	2.73e-08	0.000212
GO_DNA_METABOLIC_PROCESS	850	Any cellular metabolic process involving deoxyribonucleic acid. This is one of the two main types of nucleic acid, consisting of a long, unbranched macromolecule formed from one, or more commonly, two, strands of linked deoxyribonucleotides. [ISBN:0198506732]	6	0.0071	1.01e-07	0.000519
FISCHER_DREAM_TARGETS	967	Target genes of the DREAM complex.	6	0.0062	2.15e-07	0.000833
PAL_PRMT5_TARGETS_UP	195	Genes up-regulated in NIH-3T3 cells (fibroblast) after knockdown of PRMT5 [GeneID=10419] by RNAi.	4	0.0205	3.2e-07	0.000968
GO_CHROMOSOME	1063	A structure composed of a very long molecule of DNA and associated proteins (e.g. histones) that carries hereditary information. [ISBN:0198547684]	6	0.0056	3.75e-07	0.000968
GO_CHROMOSOME_ORGANIZATION	1207	A process that is carried out at the cellular level that results in the assembly, arrangement of constituent parts, or disassembly of chromosomes, structures composed of a very long molecule of DNA and associated proteins that carries hereditary information. This term covers covalent modifications at the molecular level as well as spatial relationships among the major components of a chromosome. …	6	0.005	7.89e-07	0.00159
GO_CELL_CYCLE_PHASE_TRANSITION	621	The cell cycle process by which a cell commits to entering the next cell cycle phase. [GOC:mtg_cell_cycle]	5	0.0081	8.2e-07	0.00159
REACTOME_CELL_CYCLE	642	Cell Cycle	5	0.0078	9.66e-07	0.00166
GO_CELL_CYCLE_PROCESS	1383	The cellular process that ensures successive accurate and complete genome replication and chromosome segregation. [GOC:isa_complete, GOC:mtg_cell_cycle]	6	0.0043	1.74e-06	0.00259
DODD_NASOPHARYNGEAL_CARCINOMA_DN	1396	Genes down-regulated in nasopharyngeal carcinoma (NPC) compared to the normal tissue.	6	0.0043	1.84e-06	0.00259
DUTERTRE_ESTRADIOL_RESPONSE_24HR_UP	323	Genes up-regulated in MCF7 cells (breast cancer) at 24 h of estradiol [PubChem=5757] treatment.	4	0.0124	2.39e-06	0.00309
LEE_BMP2_TARGETS_DN	883	Genes down-regulated in uterus upon knockout of BMP2 [GeneID=650].	5	0.0057	4.6e-06	0.00548
TOYOTA_TARGETS_OF_MIR34B_AND_MIR34C	446	Genes down-regulated in HCT116 cells (colon cancer) upon expression of MIR34B or MIR34C [GeneID=407041;407042] microRNAs.	4	0.009	8.55e-06	0.00947
GO_DNA_POLYMERASE_COMPLEX	16	A protein complex that possesses DNA polymerase activity and is involved in template directed synthesis of DNA. [GOC:jl, PMID:12045093]	2	0.125	1.09e-05	0.0113
KAUFFMANN_DNA_REPLICATION_GENES	147	Genes involved in DNA replication, compiled manually by the authors.	3	0.0204	1.21e-05	0.0115
REACTOME_MITOTIC_G1_G1_S_PHASES	149	Mitotic G1-G1/S phases	3	0.0201	1.26e-05	0.0115
REACTOME_S_PHASE	161	S Phase	3	0.0186	1.59e-05	0.0137
REACTOME_CELL_CYCLE_MITOTIC	536	Cell Cycle, Mitotic	4	0.0075	1.76e-05	0.014
BERENJENO_TRANSFORMED_BY_RHOA_UP	540	Genes up-regulated in NIH3T3 cells (fibroblasts) transformed by expression of contitutively active (Q63L) form of RHOA [GeneID=387] off plasmid vector.	4	0.0074	1.81e-05	0.014
CHICAS_RB1_TARGETS_CONFLUENT	563	Genes up-regulated in confluent IMR90 cells (fibroblast) after knockdown of RB1 [GeneID=5925] by RNAi.	4	0.0071	2.14e-05	0.0144
GOBERT_OLIGODENDROCYTE_DIFFERENTIATION_UP	563	Genes up-regulated during later stage of differentiation of Oli-Neu cells (oligodendroglial precursor) in response to PD174265 [PubChem=4709].	4	0.0071	2.14e-05	0.0144
GO_REGULATION_OF_CELL_CYCLE	1212	Any process that modulates the rate or extent of progression through the cell cycle. [GOC:ai, GOC:dph, GOC:tb]	5	0.0041	2.14e-05	0.0144
GO_CATALYTIC_ACTIVITY_ACTING_ON_DNA	181	Catalytic activity that acts to modify DNA. [GOC:pdt]	3	0.0166	2.26e-05	0.0146
GO_DNA_BIOSYNTHETIC_PROCESS	189	The cellular DNA metabolic process resulting in the formation of DNA, deoxyribonucleic acid, one of the two main types of nucleic acid, consisting of a long unbranched macromolecule formed from one or two strands of linked deoxyribonucleotides, the 3'-phosphate group of each constituent deoxyribonucleotide being joined in 3',5'-phosphodiester linkage to the 5'-hydroxyl group of the deoxyribose mo…	3	0.0159	2.57e-05	0.0157
FUJII_YBX1_TARGETS_DN	193	Genes down-regulated in MCF-7 cells (breast cancer) after knockdown of YBX1 [GeneID=4904] by RNAi.	3	0.0155	2.73e-05	0.0157
GO_NUCLEAR_CHROMOSOME	600	A chromosome that encodes the nuclear genome and is found in the nucleus of a eukaryotic cell during the cell cycle phases when the nucleus is intact. [GOC:dph, GOC:mah]	4	0.0067	2.74e-05	0.0157
KINSEY_TARGETS_OF_EWSR1_FLII_FUSION_UP	1289	Genes up-regulated in TC71 and EWS502 cells (Ewing's sarcoma) by EWSR1-FLI1 [GeneID=2130;2314] as inferred from RNAi knockdown of this fusion protein.	5	0.0039	2.87e-05	0.0158
NIKOLSKY_BREAST_CANCER_5P15_AMPLICON	26	Genes within amplicon 5p15 identified in a copy number alterations study of 191 breast tumor samples.	2	0.0769	2.95e-05	0.0158
SHEPARD_BMYB_MORPHOLINO_DN	203	Human orthologs of genes down-regulated in zebra fish after knockdown of BMYB [GeneID=4605] by morpholino.	3	0.0148	3.18e-05	0.0164
BUYTAERT_PHOTODYNAMIC_THERAPY_STRESS_DN	648	Genes down-regulated in T24 (bladder cancer) cells in response to the photodynamic therapy (PDT) stress.	4	0.0062	3.7e-05	0.0185
REACTOME_EXTENSION_OF_TELOMERES	30	Extension of Telomeres	2	0.0667	3.95e-05	0.0191
DUTERTRE_ESTRADIOL_RESPONSE_6HR_UP	228	Genes up-regulated in MCF7 cells (breast cancer) at 6 h of estradiol [PubChem=5757] treatment.	3	0.0132	4.49e-05	0.0205
GO_DNA_POLYMERASE_ACTIVITY	32	Catalysis of the reaction: deoxynucleoside triphosphate + DNA(n) = diphosphate + DNA(n+1); the synthesis of DNA from deoxyribonucleotide triphosphates in the presence of a nucleic acid template and a 3'hydroxyl group. [EC:2.7.7.7, GOC:mah]	2	0.0625	4.5e-05	0.0205
REACTOME_ACTIVATION_OF_THE_PRE_REPLICATIVE_COMPLEX	33	Activation of the pre-replicative complex	2	0.0606	4.79e-05	0.0212
CHICAS_RB1_TARGETS_GROWING	243	Genes up-regulated in growing IMR90 cells (fibroblast) after knockdown of RB1 [GeneID=5925] by RNAi.	3	0.0123	5.42e-05	0.0233
KEGG_DNA_REPLICATION	36	DNA replication	2	0.0556	5.71e-05	0.0239
GO_DNA_REPLICATION_INITIATION	37	The process in which DNA-dependent DNA replication is started; this begins with the ATP dependent loading of an initiator complex onto the DNA, this is followed by DNA melting and helicase activity. In bacteria, the gene products that enable the helicase activity are loaded after the initial melting and in archaea and eukaryotes, the gene products that enable the helicase activity are inactive wh…	2	0.0541	6.03e-05	0.024
KOBAYASHI_EGFR_SIGNALING_24HR_DN	252	Genes down-regulated in H1975 cells (non-small cell lung cancer, NSCLC) resistant to gefitinib [PubChem=123631] after treatment with EGFR inhibitor CL-387785 [PubChem=2776] for 24h.	3	0.0119	6.04e-05	0.024
BURTON_ADIPOGENESIS_PEAK_AT_16HR	41	Cluster 4: genes maximally expressed at 16 h time point during differentiation of 3T3-L1 fibroblasts into adipocytes in response to adipogenic hormones.	2	0.0488	7.42e-05	0.0279
KAMMINGA_EZH2_TARGETS	41	Putative targets or partners of EZH2 [GeneID=2146] in hematopoietic stem cells.	2	0.0488	7.42e-05	0.0279
GO_DNA_REPLICATION	272	The cellular metabolic process in which a cell duplicates one or more molecules of DNA. DNA replication begins when specific sequences, known as origins of replication, are recognized and bound by initiation proteins, and ends when the original DNA molecule has been completely duplicated and the copies topologically separated. The unit of replication usually corresponds to the genome of the cell,…	3	0.011	7.57e-05	0.0279
GO_REGULATION_OF_CELL_CYCLE_PROCESS	796	Any process that modulates a cellular process that is involved in the progression of biochemical and morphological phases and events that occur in a cell during successive cell replication or nuclear replication events. [GOC:dph, GOC:tb]	4	0.005	8.23e-05	0.0296
GO_CELL_CYCLE_G1_S_PHASE_TRANSITION	293	The cell cycle process by which a cell in G1 phase commits to S phase. [GOC:mtg_cell_cycle]	3	0.0102	9.44e-05	0.0332
ODONNELL_TARGETS_OF_MYC_AND_TFRC_DN	47	Genes up-regulated in P493-6 cells (B lymphocyte, Burkitt's lymphoma model) by MYC [GeneID=4609] and down-regulated by RNAi knockdown of TFRC [GeneID=7037].	2	0.0426	9.78e-05	0.0337
SENGUPTA_NASOPHARYNGEAL_CARCINOMA_UP	301	Genes up-regulated in nsopharyngeal carcinoma relative to the normal tissue.	3	0.01	0.000102	0.0344
SUNG_METASTASIS_STROMA_DN	54	Genes down-regulated in metastatic vs non-metastatic stromal cells originated from either bone or prostate tissues.	2	0.037	0.000129	0.0426
WONG_EMBRYONIC_STEM_CELL_CORE	335	The 'core ESC-like gene module': genes coordinately up-regulated in a compendium of mouse embryonic stem cells (ESC) which are shared with the human ESC-like module.	3	0.009	0.00014	0.0453
GO_CHROMOSOMAL_REGION	348	Any subdivision of a chromosome along its length. [GOC:dos]	3	0.0086	0.000157	0.0496
