# Supplementary material for: Integrated analysis of telomerase enzymatic activity unravels an association with cancer stemness and proliferation
Source: Nat Commun. 2021 Jan 8;12:139. doi: 10.1038/s41467-020-20474-9 (PMC7794223; doi:10.1038/s41467-020-20474-9)
Supplement: Supplementary file 6 — Supplementary Data 3 [file 41467_2020_20474_MOESM6_ESM.xlsx]

## Sheet: Supp.Data 3
Supplementary Data 3
SampleID	Tissues	Description	EXTEND Scores
GTEX-U8XE-0426-SM-3DB91	AdiposeSC	AdiposeSubcutaneous	0.227872
GTEX-WI4N-1126-SM-3LK7Q	AdiposeSC	AdiposeSubcutaneous	0.235522
GTEX-14E6C-0226-SM-5S2N3	AdiposeSC	AdiposeSubcutaneous	0.238348
GTEX-YJ8A-0526-SM-5IFHT	AdiposeSC	AdiposeSubcutaneous	0.255585
GTEX-11TUW-2626-SM-5EQKZ	AdiposeSC	AdiposeSubcutaneous	0.263867
GTEX-11TT1-2426-SM-5EQMK	AdiposeSC	AdiposeSubcutaneous	0.266903
GTEX-X88G-0226-SM-4GIE4	AdiposeSC	AdiposeSubcutaneous	0.277007
GTEX-132AR-0226-SM-5IJBE	AdiposeSC	AdiposeSubcutaneous	0.283835
GTEX-PLZ5-1826-SM-3NB22	AdiposeSC	AdiposeSubcutaneous	0.284482
GTEX-SSA3-0226-SM-32QPN	AdiposeSC	AdiposeSubcutaneous	0.28544
GTEX-144GM-1926-SM-5LUAN	AdiposeSC	AdiposeSubcutaneous	0.286587
GTEX-QDT8-0226-SM-32PL4	AdiposeSC	AdiposeSubcutaneous	0.287905
GTEX-TMZS-0226-SM-3DB9N	AdiposeSC	AdiposeSubcutaneous	0.288357
GTEX-XV7Q-2626-SM-4BRVA	AdiposeSC	AdiposeSubcutaneous	0.290833
GTEX-146FH-0226-SM-5QGPQ	AdiposeSC	AdiposeSubcutaneous	0.292497
GTEX-OOBK-0226-SM-2YUMF	AdiposeSC	AdiposeSubcutaneous	0.297076
GTEX-X638-0226-SM-47JZ9	AdiposeSC	AdiposeSubcutaneous	0.29902
GTEX-133LE-1926-SM-5N9FV	AdiposeSC	AdiposeSubcutaneous	0.302207
GTEX-R55G-2426-SM-2TC5I	AdiposeSC	AdiposeSubcutaneous	0.304027
GTEX-13OVI-1326-SM-5IJBO	AdiposeSC	AdiposeSubcutaneous	0.30636
GTEX-XMK1-2226-SM-4B673	AdiposeSC	AdiposeSubcutaneous	0.308945
GTEX-11ZVC-2626-SM-5FQTA	AdiposeSC	AdiposeSubcutaneous	0.309157
GTEX-144GL-0226-SM-5QGOX	AdiposeSC	AdiposeSubcutaneous	0.311646
GTEX-SNMC-1326-SM-2XCFK	AdiposeSC	AdiposeSubcutaneous	0.313503
GTEX-P4QT-0226-SM-3LK68	AdiposeSC	AdiposeSubcutaneous	0.314263
GTEX-113IC-0226-SM-5HL5C	AdiposeSC	AdiposeSubcutaneous	0.314565
GTEX-VJYA-1326-SM-3GIJC	AdiposeSC	AdiposeSubcutaneous	0.316651
GTEX-X4XY-0326-SM-46MVZ	AdiposeSC	AdiposeSubcutaneous	0.318425
GTEX-11DXX-2326-SM-5Q5A2	AdiposeSC	AdiposeSubcutaneous	0.32188
GTEX-13PLJ-0126-SM-5L3HU	AdiposeSC	AdiposeSubcutaneous	0.327352
GTEX-OXRP-0226-SM-3NB14	AdiposeSC	AdiposeSubcutaneous	0.328746
GTEX-OIZH-0226-SM-2YUMH	AdiposeSC	AdiposeSubcutaneous	0.333357
GTEX-12WSL-2426-SM-5GCN7	AdiposeSC	AdiposeSubcutaneous	0.335821
GTEX-QEL4-0326-SM-3GAE5	AdiposeSC	AdiposeSubcutaneous	0.355518
GTEX-1AX9K-2426-SM-73KZ4	AdiposeSC	AdiposeSubcutaneous	0.357686
GTEX-1B8SG-0226-SM-7939Q	AdiposeSC	AdiposeSubcutaneous	0.372698
GTEX-OIZI-0226-SM-2XCEE	AdiposeSC	AdiposeSubcutaneous	0.375045
GTEX-14A5H-0526-SM-5TDCN	AdiposeSC	AdiposeSubcutaneous	0.393188
GTEX-14PJ6-2226-SM-6LLIV	AdiposeSC	AdiposeSubcutaneous	0.397077
GTEX-Q734-1826-SM-2I3EL	AdiposeSC	AdiposeSubcutaneous	0.399666
GTEX-13YAN-0426-SM-5O9DR	AdiposeSC	AdiposeSubcutaneous	0.413231
GTEX-T5JC-0526-SM-32PM7	AdiposeSC	AdiposeSubcutaneous	0.424133
GTEX-13O1R-0226-SM-5K7U5	AdiposeSC	AdiposeSubcutaneous	0.430588
GTEX-RWSA-0226-SM-2XCBA	AdiposeSC	AdiposeSubcutaneous	0.435099
GTEX-16YQH-0226-SM-6PALD	AdiposeSC	AdiposeSubcutaneous	0.435472
GTEX-OXRN-0226-SM-2I5EJ	AdiposeSC	AdiposeSubcutaneous	0.43767
GTEX-11O72-0226-SM-59869	AdiposeSC	AdiposeSubcutaneous	0.439023
GTEX-13NYS-0226-SM-5MR49	AdiposeSC	AdiposeSubcutaneous	0.44541
GTEX-13NZB-2426-SM-5K7UF	AdiposeSC	AdiposeSubcutaneous	0.446312
GTEX-RM2N-1726-SM-2TF55	AdiposeSC	AdiposeSubcutaneous	0.45771
GTEX-11UD1-0226-SM-5EQKL	AdiposeSC	AdiposeSubcutaneous	0.457871
GTEX-16GPK-0226-SM-7DUFI	AdiposeSC	AdiposeSubcutaneous	0.460193
GTEX-Y3IK-2526-SM-4WWDM	AdiposeSC	AdiposeSubcutaneous	0.462136
GTEX-OOBJ-0226-SM-2YUMM	AdiposeSC	AdiposeSubcutaneous	0.462627
GTEX-11ZTS-0226-SM-5EQKD	AdiposeSC	AdiposeSubcutaneous	0.463892
GTEX-13113-1826-SM-5LZW4	AdiposeSC	AdiposeSubcutaneous	0.467648
GTEX-OHPM-0226-SM-3LK61	AdiposeSC	AdiposeSubcutaneous	0.468898
GTEX-139D8-0326-SM-5IJCJ	AdiposeSC	AdiposeSubcutaneous	0.473806
GTEX-12ZZY-0326-SM-5LZVQ	AdiposeSC	AdiposeSubcutaneous	0.479065
GTEX-14PJ4-2226-SM-6LLIS	AdiposeSC	AdiposeSubcutaneous	0.479149
GTEX-14PII-0326-SM-6LLIQ	AdiposeSC	AdiposeSubcutaneous	0.485456
GTEX-R53T-1626-SM-3GAEW	AdiposeSC	AdiposeSubcutaneous	0.488545
GTEX-1117F-0226-SM-5GZZ7	AdiposeSC	AdiposeSubcutaneous	0.489621
GTEX-PX3G-0226-SM-3NB2C	AdiposeSC	AdiposeSubcutaneous	0.491234
GTEX-Y8E5-0226-SM-57WCM	AdiposeSC	AdiposeSubcutaneous	0.492018
GTEX-15ER7-0426-SM-6PAM3	AdiposeSC	AdiposeSubcutaneous	0.494272
GTEX-S33H-1126-SM-2XCB6	AdiposeSC	AdiposeSubcutaneous	0.49455
GTEX-QESD-1526-SM-2S1QT	AdiposeSC	AdiposeSubcutaneous	0.497138
GTEX-S7SE-0226-SM-2XCD4	AdiposeSC	AdiposeSubcutaneous	0.497392
GTEX-NL3G-0226-SM-4RGLU	AdiposeSC	AdiposeSubcutaneous	0.498235
GTEX-Y8LW-1926-SM-4WWFZ	AdiposeSC	AdiposeSubcutaneous	0.498479
GTEX-ZYFD-0226-SM-5NQ86	AdiposeSC	AdiposeSubcutaneous	0.500121
GTEX-ZV68-0226-SM-59HJF	AdiposeSC	AdiposeSubcutaneous	0.501571
GTEX-Z93T-0226-SM-5HL5Z	AdiposeSC	AdiposeSubcutaneous	0.50173
GTEX-SIU8-0226-SM-2XCDS	AdiposeSC	AdiposeSubcutaneous	0.50272
GTEX-11ZUS-0726-SM-59886	AdiposeSC	AdiposeSubcutaneous	0.504536
GTEX-YJ89-0226-SM-4TT3Y	AdiposeSC	AdiposeSubcutaneous	0.504688
GTEX-14C5O-0226-SM-5SI6O	AdiposeSC	AdiposeSubcutaneous	0.507102
GTEX-1E1VI-0226-SM-793CZ	AdiposeSC	AdiposeSubcutaneous	0.507352
GTEX-ZF3C-0226-SM-4WWB3	AdiposeSC	AdiposeSubcutaneous	0.509063
GTEX-ZXES-2026-SM-5NQ6R	AdiposeSC	AdiposeSubcutaneous	0.51012
GTEX-ZLV1-1826-SM-5FQU5	AdiposeSC	AdiposeSubcutaneous	0.510954
GTEX-TSE9-0226-SM-3DB84	AdiposeSC	AdiposeSubcutaneous	0.51166
GTEX-131XF-2226-SM-5EQKG	AdiposeSC	AdiposeSubcutaneous	0.511741
GTEX-WFON-2226-SM-3TW8W	AdiposeSC	AdiposeSubcutaneous	0.511972
GTEX-11WQC-2426-SM-5EQKQ	AdiposeSC	AdiposeSubcutaneous	0.51236
GTEX-15ETS-0426-SM-6PANI	AdiposeSC	AdiposeSubcutaneous	0.512572
GTEX-11ZU8-2426-SM-5EQMV	AdiposeSC	AdiposeSubcutaneous	0.515368
GTEX-18A67-0226-SM-7LG67	AdiposeSC	AdiposeSubcutaneous	0.516115
GTEX-11PRG-0626-SM-5BC56	AdiposeSC	AdiposeSubcutaneous	0.517287
GTEX-14E1K-2126-SM-793DU	AdiposeSC	AdiposeSubcutaneous	0.517985
GTEX-XUW1-0526-SM-4BOP3	AdiposeSC	AdiposeSubcutaneous	0.51866
GTEX-Y5V5-2426-SM-5IFJA	AdiposeSC	AdiposeSubcutaneous	0.519969
GTEX-ZYVF-0226-SM-5GIEG	AdiposeSC	AdiposeSubcutaneous	0.520293
GTEX-145MG-0126-SM-5TDDA	AdiposeSC	AdiposeSubcutaneous	0.520491
GTEX-T6MO-1726-SM-33HB8	AdiposeSC	AdiposeSubcutaneous	0.52055
GTEX-1313W-0226-SM-5LZV7	AdiposeSC	AdiposeSubcutaneous	0.520611
GTEX-XYKS-2726-SM-4E3IC	AdiposeSC	AdiposeSubcutaneous	0.520637
GTEX-111VG-2326-SM-5N9BK	AdiposeSC	AdiposeSubcutaneous	0.520727
GTEX-WHPG-2126-SM-4M1ZM	AdiposeSC	AdiposeSubcutaneous	0.520829
GTEX-OHPN-0226-SM-48TBV	AdiposeSC	AdiposeSubcutaneous	0.52117
GTEX-131XW-0526-SM-5PNXZ	AdiposeSC	AdiposeSubcutaneous	0.522124
GTEX-111FC-0226-SM-5N9B8	AdiposeSC	AdiposeSubcutaneous	0.522621
GTEX-X4EO-0426-SM-4QASA	AdiposeSC	AdiposeSubcutaneous	0.522713
GTEX-1B8SF-0526-SM-7939F	AdiposeSC	AdiposeSubcutaneous	0.525553
GTEX-17MF6-0226-SM-7LG4G	AdiposeSC	AdiposeSubcutaneous	0.525953
GTEX-111CU-1826-SM-5GZYN	AdiposeSC	AdiposeSubcutaneous	0.526609
GTEX-12WSA-0326-SM-5BC6I	AdiposeSC	AdiposeSubcutaneous	0.527024
GTEX-Q2AI-1426-SM-2S1P5	AdiposeSC	AdiposeSubcutaneous	0.52758
GTEX-145LT-1826-SM-5QGP4	AdiposeSC	AdiposeSubcutaneous	0.5281
GTEX-14PJ2-0226-SM-6LLH4	AdiposeSC	AdiposeSubcutaneous	0.528446
GTEX-18A6Q-0226-SM-718AS	AdiposeSC	AdiposeSubcutaneous	0.528715
GTEX-XUYS-0226-SM-47JX1	AdiposeSC	AdiposeSubcutaneous	0.528719
GTEX-XQ8I-0526-SM-4BOPS	AdiposeSC	AdiposeSubcutaneous	0.529779
GTEX-ZVE2-0326-SM-57WFC	AdiposeSC	AdiposeSubcutaneous	0.529792
GTEX-ZTPG-0226-SM-5O99I	AdiposeSC	AdiposeSubcutaneous	0.530196
GTEX-183WM-0226-SM-7LT8T	AdiposeSC	AdiposeSubcutaneous	0.530238
GTEX-11ONC-2526-SM-5986W	AdiposeSC	AdiposeSubcutaneous	0.53104
GTEX-POYW-0726-SM-2XCEO	AdiposeSC	AdiposeSubcutaneous	0.531118
GTEX-1C6WA-0226-SM-7IGPO	AdiposeSC	AdiposeSubcutaneous	0.531721
GTEX-T5JW-1726-SM-3GADN	AdiposeSC	AdiposeSubcutaneous	0.531774
GTEX-YFCO-2026-SM-4W21Q	AdiposeSC	AdiposeSubcutaneous	0.532142
GTEX-1A32A-0226-SM-718B2	AdiposeSC	AdiposeSubcutaneous	0.53264
GTEX-OXRK-0326-SM-3NB3R	AdiposeSC	AdiposeSubcutaneous	0.532924
GTEX-1B8KZ-1926-SM-7DUG8	AdiposeSC	AdiposeSubcutaneous	0.533569
GTEX-ZEX8-2326-SM-5S2MN	AdiposeSC	AdiposeSubcutaneous	0.533942
GTEX-1EWIQ-0226-SM-793D3	AdiposeSC	AdiposeSubcutaneous	0.53491
GTEX-YECK-0226-SM-4W215	AdiposeSC	AdiposeSubcutaneous	0.536178
GTEX-13FTY-0626-SM-5L3F8	AdiposeSC	AdiposeSubcutaneous	0.537446
GTEX-P78B-0226-SM-3NB1Z	AdiposeSC	AdiposeSubcutaneous	0.537917
GTEX-Q2AG-0226-SM-2S1P4	AdiposeSC	AdiposeSubcutaneous	0.538101
GTEX-14PKU-2126-SM-7LT8A	AdiposeSC	AdiposeSubcutaneous	0.538391
GTEX-13JVG-0226-SM-5J1MW	AdiposeSC	AdiposeSubcutaneous	0.538418
GTEX-OXRO-0226-SM-3LK6F	AdiposeSC	AdiposeSubcutaneous	0.538505
GTEX-13NZ9-0526-SM-5J1OX	AdiposeSC	AdiposeSubcutaneous	0.53923
GTEX-17HG3-2326-SM-79OKH	AdiposeSC	AdiposeSubcutaneous	0.539584
GTEX-1314G-1626-SM-5EQ67	AdiposeSC	AdiposeSubcutaneous	0.539893
GTEX-15CHQ-0226-SM-6EU2S	AdiposeSC	AdiposeSubcutaneous	0.539952
GTEX-145LS-0226-SM-5O9A5	AdiposeSC	AdiposeSubcutaneous	0.541839
GTEX-13O3Q-2326-SM-5KM3G	AdiposeSC	AdiposeSubcutaneous	0.542231
GTEX-S95S-1326-SM-2XCDK	AdiposeSC	AdiposeSubcutaneous	0.545511
GTEX-17EVP-0426-SM-79OKG	AdiposeSC	AdiposeSubcutaneous	0.545973
GTEX-11P82-1726-SM-5Q5AT	AdiposeSC	AdiposeSubcutaneous	0.546363
GTEX-139TU-0226-SM-5J1NM	AdiposeSC	AdiposeSubcutaneous	0.546657
GTEX-P44H-0326-SM-2XCES	AdiposeSC	AdiposeSubcutaneous	0.54696
GTEX-WFJO-1926-SM-3GILA	AdiposeSC	AdiposeSubcutaneous	0.547029
GTEX-ZAJG-0226-SM-5HL81	AdiposeSC	AdiposeSubcutaneous	0.547505
GTEX-14AS3-2026-SM-5TDD9	AdiposeSC	AdiposeSubcutaneous	0.547894
GTEX-NPJ8-0226-SM-48TBN	AdiposeSC	AdiposeSubcutaneous	0.548197
GTEX-X8HC-0226-SM-4E3K1	AdiposeSC	AdiposeSubcutaneous	0.54843
GTEX-ZPCL-2126-SM-57WFZ	AdiposeSC	AdiposeSubcutaneous	0.548564
GTEX-1122O-2026-SM-5NQ91	AdiposeSC	AdiposeSubcutaneous	0.549394
GTEX-17HGU-0326-SM-7DUER	AdiposeSC	AdiposeSubcutaneous	0.550263
GTEX-14PK6-2026-SM-6LLHP	AdiposeSC	AdiposeSubcutaneous	0.550441
GTEX-16NPX-0326-SM-7EWDI	AdiposeSC	AdiposeSubcutaneous	0.550939
GTEX-13CF2-2626-SM-5LZZA	AdiposeSC	AdiposeSubcutaneous	0.550988
GTEX-13OW6-0526-SM-5L3HY	AdiposeSC	AdiposeSubcutaneous	0.551021
GTEX-XK95-0426-SM-4AT4R	AdiposeSC	AdiposeSubcutaneous	0.551232
GTEX-1AYD5-2326-SM-73KXF	AdiposeSC	AdiposeSubcutaneous	0.551532
GTEX-11EI6-0226-SM-5EQ64	AdiposeSC	AdiposeSubcutaneous	0.552078
GTEX-11EM3-2326-SM-5H12B	AdiposeSC	AdiposeSubcutaneous	0.552238
GTEX-WEY5-1926-SM-3GIL8	AdiposeSC	AdiposeSubcutaneous	0.552342
GTEX-X62O-0226-SM-4E3JB	AdiposeSC	AdiposeSubcutaneous	0.552429
GTEX-11UD2-0126-SM-5EQL2	AdiposeSC	AdiposeSubcutaneous	0.552826
GTEX-13OVJ-0326-SM-5L3GL	AdiposeSC	AdiposeSubcutaneous	0.552934
GTEX-ZYFC-0326-SM-5NQ7H	AdiposeSC	AdiposeSubcutaneous	0.552946
GTEX-QDVJ-1826-SM-2S1P3	AdiposeSC	AdiposeSubcutaneous	0.553125
GTEX-Z9EW-1826-SM-5CVMA	AdiposeSC	AdiposeSubcutaneous	0.553165
GTEX-11EQ8-0226-SM-5EQ5G	AdiposeSC	AdiposeSubcutaneous	0.55414
GTEX-ZE7O-0226-SM-5S2N1	AdiposeSC	AdiposeSubcutaneous	0.554186
GTEX-16NGA-1826-SM-7LG5L	AdiposeSC	AdiposeSubcutaneous	0.554924
GTEX-146FQ-0226-SM-5NQAL	AdiposeSC	AdiposeSubcutaneous	0.554985
GTEX-13QJ3-0426-SM-5RQHP	AdiposeSC	AdiposeSubcutaneous	0.55522
GTEX-14DAQ-0226-SM-664MQ	AdiposeSC	AdiposeSubcutaneous	0.555424
GTEX-1128S-2126-SM-5H12U	AdiposeSC	AdiposeSubcutaneous	0.555534
GTEX-13NZA-0126-SM-5K7UH	AdiposeSC	AdiposeSubcutaneous	0.555886
GTEX-ZVT2-2226-SM-5NQ6P	AdiposeSC	AdiposeSubcutaneous	0.556468
GTEX-16AAH-2026-SM-7LG5F	AdiposeSC	AdiposeSubcutaneous	0.556735
GTEX-13D11-2326-SM-5IJCY	AdiposeSC	AdiposeSubcutaneous	0.556739
GTEX-1211K-2226-SM-5FQU6	AdiposeSC	AdiposeSubcutaneous	0.556854
GTEX-17F9Y-0326-SM-7IGLS	AdiposeSC	AdiposeSubcutaneous	0.557435
GTEX-16MT8-0526-SM-6PAM6	AdiposeSC	AdiposeSubcutaneous	0.557615
GTEX-11OF3-2426-SM-5Q5AS	AdiposeSC	AdiposeSubcutaneous	0.557802
GTEX-REY6-0326-SM-2TF5A	AdiposeSC	AdiposeSubcutaneous	0.55812
GTEX-ZTSS-2026-SM-5987K	AdiposeSC	AdiposeSubcutaneous	0.558276
GTEX-QLQ7-1526-SM-2S1QA	AdiposeSC	AdiposeSubcutaneous	0.558304
GTEX-1269C-2726-SM-5EGJ4	AdiposeSC	AdiposeSubcutaneous	0.558511
GTEX-13X6J-0226-SM-7EPGC	AdiposeSC	AdiposeSubcutaneous	0.558645
GTEX-WVLH-0226-SM-3MJG6	AdiposeSC	AdiposeSubcutaneous	0.558685
GTEX-13S7M-0226-SM-5S2UG	AdiposeSC	AdiposeSubcutaneous	0.559206
GTEX-13O3P-0226-SM-5KM3Z	AdiposeSC	AdiposeSubcutaneous	0.559263
GTEX-TML8-2026-SM-32QOP	AdiposeSC	AdiposeSubcutaneous	0.559419
GTEX-12126-0426-SM-5Q5AP	AdiposeSC	AdiposeSubcutaneous	0.559449
GTEX-ZAK1-0226-SM-5CVMX	AdiposeSC	AdiposeSubcutaneous	0.559545
GTEX-X15G-2326-SM-4PQZS	AdiposeSC	AdiposeSubcutaneous	0.559979
GTEX-XXEK-2426-SM-4BRUS	AdiposeSC	AdiposeSubcutaneous	0.561056
GTEX-1C2JI-2226-SM-7IGPJ	AdiposeSC	AdiposeSubcutaneous	0.561218
GTEX-1A8G7-0226-SM-731AS	AdiposeSC	AdiposeSubcutaneous	0.561497
GTEX-XPVG-2726-SM-4B66W	AdiposeSC	AdiposeSubcutaneous	0.561971
GTEX-VUSG-2426-SM-4KKZG	AdiposeSC	AdiposeSubcutaneous	0.562234
GTEX-ZC5H-0126-SM-4WAYL	AdiposeSC	AdiposeSubcutaneous	0.563123
GTEX-17KNJ-2226-SM-7LG6W	AdiposeSC	AdiposeSubcutaneous	0.563797
GTEX-YFC4-0226-SM-57WD2	AdiposeSC	AdiposeSubcutaneous	0.563867
GTEX-14LLW-0226-SM-62LEL	AdiposeSC	AdiposeSubcutaneous	0.56389
GTEX-ZP4G-2326-SM-57WEM	AdiposeSC	AdiposeSubcutaneous	0.564151
GTEX-XUZC-1826-SM-4BRVO	AdiposeSC	AdiposeSubcutaneous	0.564337
GTEX-QMRM-1726-SM-2S1QG	AdiposeSC	AdiposeSubcutaneous	0.564556
GTEX-13N11-2626-SM-5K7UQ	AdiposeSC	AdiposeSubcutaneous	0.565226
GTEX-S32W-2226-SM-2XCAY	AdiposeSC	AdiposeSubcutaneous	0.565709
GTEX-13NZ8-0926-SM-5MR3U	AdiposeSC	AdiposeSubcutaneous	0.565904
GTEX-U3ZN-2626-SM-3DB7T	AdiposeSC	AdiposeSubcutaneous	0.566147
GTEX-18A7A-0326-SM-731AT	AdiposeSC	AdiposeSubcutaneous	0.566339
GTEX-PWCY-1926-SM-3NB25	AdiposeSC	AdiposeSubcutaneous	0.566531
GTEX-ZE9C-2826-SM-5S2MO	AdiposeSC	AdiposeSubcutaneous	0.566877
GTEX-14ABY-0326-SM-5TDDK	AdiposeSC	AdiposeSubcutaneous	0.56758
GTEX-1A3MX-0226-SM-731C4	AdiposeSC	AdiposeSubcutaneous	0.568238
GTEX-ZPIC-1826-SM-57WFE	AdiposeSC	AdiposeSubcutaneous	0.56876
GTEX-ZPU1-2426-SM-4WWFM	AdiposeSC	AdiposeSubcutaneous	0.56883
GTEX-14PJM-0326-SM-62LF2	AdiposeSC	AdiposeSubcutaneous	0.568851
GTEX-T6MN-0226-SM-32PMD	AdiposeSC	AdiposeSubcutaneous	0.569141
GTEX-148VI-1726-SM-5S2W9	AdiposeSC	AdiposeSubcutaneous	0.569145
GTEX-12ZZX-0226-SM-5DUXU	AdiposeSC	AdiposeSubcutaneous	0.569495
GTEX-12WSC-0226-SM-5EQ52	AdiposeSC	AdiposeSubcutaneous	0.569892
GTEX-13PVR-2426-SM-5RQHN	AdiposeSC	AdiposeSubcutaneous	0.570388
GTEX-11DXW-0326-SM-5H11W	AdiposeSC	AdiposeSubcutaneous	0.570463
GTEX-ZF29-2226-SM-4WWB9	AdiposeSC	AdiposeSubcutaneous	0.57104
GTEX-145MN-2626-SM-5NQAH	AdiposeSC	AdiposeSubcutaneous	0.571141
GTEX-145MI-0426-SM-5O99V	AdiposeSC	AdiposeSubcutaneous	0.571933
GTEX-QEG4-0326-SM-5S2UQ	AdiposeSC	AdiposeSubcutaneous	0.571937
GTEX-T2IS-0226-SM-32QPH	AdiposeSC	AdiposeSubcutaneous	0.572199
GTEX-X4LF-1726-SM-3NMBZ	AdiposeSC	AdiposeSubcutaneous	0.572406
GTEX-YJ8O-2426-SM-5HL7S	AdiposeSC	AdiposeSubcutaneous	0.57263
GTEX-17HII-0326-SM-7LG4X	AdiposeSC	AdiposeSubcutaneous	0.572789
GTEX-15DCD-0226-SM-6LPKC	AdiposeSC	AdiposeSubcutaneous	0.572965
GTEX-ZVZO-0226-SM-5A5LA	AdiposeSC	AdiposeSubcutaneous	0.573168
GTEX-144FL-0226-SM-5Q5D4	AdiposeSC	AdiposeSubcutaneous	0.57438
GTEX-WY7C-2426-SM-3NB2V	AdiposeSC	AdiposeSubcutaneous	0.574466
GTEX-P4QS-0226-SM-3NB1U	AdiposeSC	AdiposeSubcutaneous	0.574607
GTEX-ZZPU-2726-SM-5NQ8O	AdiposeSC	AdiposeSubcutaneous	0.575215
GTEX-13U4I-0226-SM-5SIB1	AdiposeSC	AdiposeSubcutaneous	0.575423
GTEX-XAJ8-0926-SM-47JXZ	AdiposeSC	AdiposeSubcutaneous	0.57575
GTEX-11GSO-2326-SM-5A5LX	AdiposeSC	AdiposeSubcutaneous	0.576022
GTEX-183FY-0326-SM-793BY	AdiposeSC	AdiposeSubcutaneous	0.576255
GTEX-ZF28-0226-SM-5S2OE	AdiposeSC	AdiposeSubcutaneous	0.576294
GTEX-Z93S-0226-SM-5HL7R	AdiposeSC	AdiposeSubcutaneous	0.576305
GTEX-15RIE-2326-SM-7KFSC	AdiposeSC	AdiposeSubcutaneous	0.576766
GTEX-14JIY-0526-SM-62LFH	AdiposeSC	AdiposeSubcutaneous	0.576867
GTEX-14PHX-2426-SM-62LEN	AdiposeSC	AdiposeSubcutaneous	0.577361
GTEX-QLQW-1226-SM-2S1Q9	AdiposeSC	AdiposeSubcutaneous	0.577773
GTEX-11GS4-2626-SM-5A5LD	AdiposeSC	AdiposeSubcutaneous	0.577994
GTEX-SN8G-0226-SM-4DM6B	AdiposeSC	AdiposeSubcutaneous	0.578113
GTEX-11EMC-2826-SM-5PNY6	AdiposeSC	AdiposeSubcutaneous	0.578385
GTEX-14C39-2526-SM-5S2UH	AdiposeSC	AdiposeSubcutaneous	0.578474
GTEX-17F98-1126-SM-79OJS	AdiposeSC	AdiposeSubcutaneous	0.578669
GTEX-1B933-0526-SM-7EPHM	AdiposeSC	AdiposeSubcutaneous	0.578773
GTEX-13FHO-0326-SM-5IJBH	AdiposeSC	AdiposeSubcutaneous	0.579391
GTEX-13PVQ-0226-SM-5SIBG	AdiposeSC	AdiposeSubcutaneous	0.579451
GTEX-18465-0226-SM-7LG5M	AdiposeSC	AdiposeSubcutaneous	0.580016
GTEX-11P81-2426-SM-5GU65	AdiposeSC	AdiposeSubcutaneous	0.580331
GTEX-11LCK-1126-SM-5A5KC	AdiposeSC	AdiposeSubcutaneous	0.580653
GTEX-Y5V6-2526-SM-5IFJV	AdiposeSC	AdiposeSubcutaneous	0.581202
GTEX-RU72-1026-SM-46MUG	AdiposeSC	AdiposeSubcutaneous	0.581314
GTEX-12ZZZ-0526-SM-5DUX6	AdiposeSC	AdiposeSubcutaneous	0.581325
GTEX-13FHP-0226-SM-5K7WD	AdiposeSC	AdiposeSubcutaneous	0.581428
GTEX-1C6VS-0426-SM-79OJV	AdiposeSC	AdiposeSubcutaneous	0.581731
GTEX-O5YV-0226-SM-48TBY	AdiposeSC	AdiposeSubcutaneous	0.582427
GTEX-131XE-2426-SM-5EQ5V	AdiposeSC	AdiposeSubcutaneous	0.582773
GTEX-17F97-0426-SM-7LT9U	AdiposeSC	AdiposeSubcutaneous	0.583434
GTEX-ZVTK-0526-SM-5GZWT	AdiposeSC	AdiposeSubcutaneous	0.583788
GTEX-13VXT-0226-SM-5LU9Q	AdiposeSC	AdiposeSubcutaneous	0.583803
GTEX-14E6D-0226-SM-62LDW	AdiposeSC	AdiposeSubcutaneous	0.583848
GTEX-147JS-0426-SM-5TDD2	AdiposeSC	AdiposeSubcutaneous	0.583899
GTEX-13JUV-2826-SM-5LZWU	AdiposeSC	AdiposeSubcutaneous	0.583972
GTEX-12WSD-0226-SM-59HKO	AdiposeSC	AdiposeSubcutaneous	0.584219
GTEX-13O61-2426-SM-5J1NV	AdiposeSC	AdiposeSubcutaneous	0.584428
GTEX-13X6K-0226-SM-5QGPB	AdiposeSC	AdiposeSubcutaneous	0.584602
GTEX-17F96-1726-SM-7IGMB	AdiposeSC	AdiposeSubcutaneous	0.585118
GTEX-14ICL-2026-SM-62LDN	AdiposeSC	AdiposeSubcutaneous	0.585593
GTEX-PWN1-0226-SM-5SI7O	AdiposeSC	AdiposeSubcutaneous	0.585679
GTEX-1497J-2326-SM-5NQBK	AdiposeSC	AdiposeSubcutaneous	0.585954
GTEX-146FR-1826-SM-5QGPF	AdiposeSC	AdiposeSubcutaneous	0.586218
GTEX-13QBU-2526-SM-5LU4X	AdiposeSC	AdiposeSubcutaneous	0.587111
GTEX-1AMEY-1426-SM-7939I	AdiposeSC	AdiposeSubcutaneous	0.587121
GTEX-13111-1726-SM-5EGJZ	AdiposeSC	AdiposeSubcutaneous	0.588731
GTEX-P4PQ-0226-SM-2S1NK	AdiposeSC	AdiposeSubcutaneous	0.588949
GTEX-QV44-1825-SM-447CF	AdiposeSC	AdiposeSubcutaneous	0.590028
GTEX-1C4CL-0426-SM-7939N	AdiposeSC	AdiposeSubcutaneous	0.590178
GTEX-145MO-0426-SM-5QGP6	AdiposeSC	AdiposeSubcutaneous	0.590545
GTEX-Y3I4-2226-SM-4TT7O	AdiposeSC	AdiposeSubcutaneous	0.590847
GTEX-XQ3S-1626-SM-4WAYN	AdiposeSC	AdiposeSubcutaneous	0.59088
GTEX-11TTK-0226-SM-5N9EC	AdiposeSC	AdiposeSubcutaneous	0.590918
GTEX-14753-0326-SM-5QGQB	AdiposeSC	AdiposeSubcutaneous	0.591303
GTEX-OHPK-0226-SM-3MJH6	AdiposeSC	AdiposeSubcutaneous	0.59193
GTEX-UJHI-1626-SM-3DB9A	AdiposeSC	AdiposeSubcutaneous	0.592582
GTEX-12584-0226-SM-5EQL5	AdiposeSC	AdiposeSubcutaneous	0.592907
GTEX-WFG8-2326-SM-5S2UE	AdiposeSC	AdiposeSubcutaneous	0.59294
GTEX-13OVK-2126-SM-6PAN1	AdiposeSC	AdiposeSubcutaneous	0.593097
GTEX-139T4-0126-SM-5HL5G	AdiposeSC	AdiposeSubcutaneous	0.593188
GTEX-11I78-2626-SM-5Q5AI	AdiposeSC	AdiposeSubcutaneous	0.593218
GTEX-144GO-1626-SM-7EPG5	AdiposeSC	AdiposeSubcutaneous	0.593355
GTEX-U4B1-1726-SM-3DB9F	AdiposeSC	AdiposeSubcutaneous	0.594059
GTEX-YB5E-2126-SM-5IFI7	AdiposeSC	AdiposeSubcutaneous	0.595044
GTEX-U412-0526-SM-3DB9I	AdiposeSC	AdiposeSubcutaneous	0.595228
GTEX-UTHO-0426-SM-5SI7N	AdiposeSC	AdiposeSubcutaneous	0.595797
GTEX-1399T-2726-SM-5K7XK	AdiposeSC	AdiposeSubcutaneous	0.596239
GTEX-QCQG-1826-SM-2S1P2	AdiposeSC	AdiposeSubcutaneous	0.596924
GTEX-ZDTS-0226-SM-5HL7Q	AdiposeSC	AdiposeSubcutaneous	0.596944
GTEX-ZUA1-0226-SM-5NQ9Q	AdiposeSC	AdiposeSubcutaneous	0.596967
GTEX-NFK9-0326-SM-3MJGV	AdiposeSC	AdiposeSubcutaneous	0.597399
GTEX-SJXC-0226-SM-2XCDU	AdiposeSC	AdiposeSubcutaneous	0.597576
GTEX-W5WG-2526-SM-4SOJ2	AdiposeSC	AdiposeSubcutaneous	0.597714
GTEX-13112-2726-SM-5DUW5	AdiposeSC	AdiposeSubcutaneous	0.597861
GTEX-1CB4I-0426-SM-7IGPR	AdiposeSC	AdiposeSubcutaneous	0.598312
GTEX-17EUY-0526-SM-7EWDE	AdiposeSC	AdiposeSubcutaneous	0.598736
GTEX-11EQ9-2526-SM-5HL66	AdiposeSC	AdiposeSubcutaneous	0.599342
GTEX-11H98-0226-SM-5NQ89	AdiposeSC	AdiposeSubcutaneous	0.599427
GTEX-13W3W-2526-SM-5SI9P	AdiposeSC	AdiposeSubcutaneous	0.599452
GTEX-13N1W-0226-SM-5K7W6	AdiposeSC	AdiposeSubcutaneous	0.599975
GTEX-12WSM-0226-SM-5LZV6	AdiposeSC	AdiposeSubcutaneous	0.600177
GTEX-ZVT4-0226-SM-51MSD	AdiposeSC	AdiposeSubcutaneous	0.600386
GTEX-139TT-0226-SM-5K7YH	AdiposeSC	AdiposeSubcutaneous	0.601557
GTEX-18D9U-0726-SM-7LG5J	AdiposeSC	AdiposeSubcutaneous	0.602505
GTEX-W5X1-2626-SM-4LMI8	AdiposeSC	AdiposeSubcutaneous	0.602788
GTEX-ZLWG-2226-SM-5DUWO	AdiposeSC	AdiposeSubcutaneous	0.60287
GTEX-15DDE-0226-SM-6LLJ6	AdiposeSC	AdiposeSubcutaneous	0.603004
GTEX-14BMV-0226-SM-5S2N2	AdiposeSC	AdiposeSubcutaneous	0.603086
GTEX-13OW7-0226-SM-5MR3N	AdiposeSC	AdiposeSubcutaneous	0.603687
GTEX-139T6-2126-SM-5KM37	AdiposeSC	AdiposeSubcutaneous	0.603783
GTEX-17HHY-0226-SM-793BQ	AdiposeSC	AdiposeSubcutaneous	0.604422
GTEX-ZDXO-2426-SM-5S2NJ	AdiposeSC	AdiposeSubcutaneous	0.604615
GTEX-1C64O-0226-SM-73KXB	AdiposeSC	AdiposeSubcutaneous	0.60475
GTEX-1A3MW-0226-SM-7939O	AdiposeSC	AdiposeSubcutaneous	0.605563
GTEX-17MFQ-1826-SM-7DHLS	AdiposeSC	AdiposeSubcutaneous	0.606117
GTEX-1A3MV-2126-SM-718BV	AdiposeSC	AdiposeSubcutaneous	0.606355
GTEX-QV31-1326-SM-2S1QE	AdiposeSC	AdiposeSubcutaneous	0.606407
GTEX-XBED-2326-SM-47JYR	AdiposeSC	AdiposeSubcutaneous	0.607172
GTEX-ZYT6-0326-SM-7LG5R	AdiposeSC	AdiposeSubcutaneous	0.607469
GTEX-13PDP-0226-SM-5K7W9	AdiposeSC	AdiposeSubcutaneous	0.608247
GTEX-11DZ1-0226-SM-5A5KF	AdiposeSC	AdiposeSubcutaneous	0.608988
GTEX-15G19-0226-SM-6PAL2	AdiposeSC	AdiposeSubcutaneous	0.609048
GTEX-Y9LG-2026-SM-62LFS	AdiposeSC	AdiposeSubcutaneous	0.609374
GTEX-ZXG5-0226-SM-59HJI	AdiposeSC	AdiposeSubcutaneous	0.60957
GTEX-Y114-2326-SM-4TT7X	AdiposeSC	AdiposeSubcutaneous	0.609693
GTEX-Y8E4-0726-SM-4WWFN	AdiposeSC	AdiposeSubcutaneous	0.60988
GTEX-11XUK-2126-SM-5EQLR	AdiposeSC	AdiposeSubcutaneous	0.609946
GTEX-1BAJH-0426-SM-73KWY	AdiposeSC	AdiposeSubcutaneous	0.610717
GTEX-ZYW4-0226-SM-5E44M	AdiposeSC	AdiposeSubcutaneous	0.610777
GTEX-YF7O-2426-SM-5IFJL	AdiposeSC	AdiposeSubcutaneous	0.611181
GTEX-Y111-0226-SM-4SOIW	AdiposeSC	AdiposeSubcutaneous	0.611417
GTEX-XBEC-0326-SM-4AT4M	AdiposeSC	AdiposeSubcutaneous	0.611892
GTEX-RTLS-0226-SM-2TF5E	AdiposeSC	AdiposeSubcutaneous	0.613141
GTEX-YB5K-2226-SM-4WWG1	AdiposeSC	AdiposeSubcutaneous	0.613599
GTEX-13O21-1526-SM-5K7W4	AdiposeSC	AdiposeSubcutaneous	0.613707
GTEX-145MF-0526-SM-5LUA6	AdiposeSC	AdiposeSubcutaneous	0.61466
GTEX-14BIN-0726-SM-793DQ	AdiposeSC	AdiposeSubcutaneous	0.615088
GTEX-14E6E-1926-SM-664N4	AdiposeSC	AdiposeSubcutaneous	0.615326
GTEX-ZVZP-2326-SM-59HL4	AdiposeSC	AdiposeSubcutaneous	0.616359
GTEX-17HHE-1926-SM-7EPGW	AdiposeSC	AdiposeSubcutaneous	0.617245
GTEX-ZDTT-2626-SM-5S2OP	AdiposeSC	AdiposeSubcutaneous	0.617264
GTEX-ZT9X-1926-SM-57WE7	AdiposeSC	AdiposeSubcutaneous	0.617981
GTEX-139T8-0226-SM-5L3EA	AdiposeSC	AdiposeSubcutaneous	0.618664
GTEX-13IVO-0226-SM-5LZXU	AdiposeSC	AdiposeSubcutaneous	0.619913
GTEX-YEC3-1226-SM-5IFI8	AdiposeSC	AdiposeSubcutaneous	0.619938
GTEX-T8EM-1126-SM-3DB7D	AdiposeSC	AdiposeSubcutaneous	0.62012
GTEX-145ME-1926-SM-5SI9S	AdiposeSC	AdiposeSubcutaneous	0.620606
GTEX-XLM4-0226-SM-4AT4N	AdiposeSC	AdiposeSubcutaneous	0.620679
GTEX-13SLX-0426-SM-5QGRC	AdiposeSC	AdiposeSubcutaneous	0.621304
GTEX-QEG5-0326-SM-2S1PB	AdiposeSC	AdiposeSubcutaneous	0.621371
GTEX-1212Z-2426-SM-5EQ5D	AdiposeSC	AdiposeSubcutaneous	0.621529
GTEX-14DAR-1926-SM-5S2NQ	AdiposeSC	AdiposeSubcutaneous	0.621863
GTEX-139YR-2426-SM-5J1OB	AdiposeSC	AdiposeSubcutaneous	0.622076
GTEX-12696-2526-SM-5EQLN	AdiposeSC	AdiposeSubcutaneous	0.622213
GTEX-16MTA-2126-SM-6PALC	AdiposeSC	AdiposeSubcutaneous	0.622252
GTEX-ZQG8-1526-SM-5HL65	AdiposeSC	AdiposeSubcutaneous	0.623417
GTEX-ZTX8-1526-SM-5N9GI	AdiposeSC	AdiposeSubcutaneous	0.623708
GTEX-15UKP-0526-SM-7KFRO	AdiposeSC	AdiposeSubcutaneous	0.623769
GTEX-XMD2-0226-SM-4WWEE	AdiposeSC	AdiposeSubcutaneous	0.624017
GTEX-13N2G-2726-SM-5J1MG	AdiposeSC	AdiposeSubcutaneous	0.624079
GTEX-X5EB-2426-SM-4E3HX	AdiposeSC	AdiposeSubcutaneous	0.625024
GTEX-P4PP-0226-SM-5S2VR	AdiposeSC	AdiposeSubcutaneous	0.625339
GTEX-ZDYS-2126-SM-5S2OD	AdiposeSC	AdiposeSubcutaneous	0.625697
GTEX-1399R-2626-SM-5KLZ7	AdiposeSC	AdiposeSubcutaneous	0.625871
GTEX-YEC4-2426-SM-57WFO	AdiposeSC	AdiposeSubcutaneous	0.625961
GTEX-13CF3-2326-SM-5IFGL	AdiposeSC	AdiposeSubcutaneous	0.626183
GTEX-XBEW-0726-SM-4QARX	AdiposeSC	AdiposeSubcutaneous	0.626694
GTEX-R55D-0326-SM-48FES	AdiposeSC	AdiposeSubcutaneous	0.627904
GTEX-13VXU-0226-SM-5SI9R	AdiposeSC	AdiposeSubcutaneous	0.628227
GTEX-14JG6-2326-SM-6LLH3	AdiposeSC	AdiposeSubcutaneous	0.628506
GTEX-13OVL-0326-SM-5IJCS	AdiposeSC	AdiposeSubcutaneous	0.628586
GTEX-16BQI-0526-SM-6PAM8	AdiposeSC	AdiposeSubcutaneous	0.628651
GTEX-15SDE-2426-SM-7KFRC	AdiposeSC	AdiposeSubcutaneous	0.62993
GTEX-R55C-1626-SM-48FEG	AdiposeSC	AdiposeSubcutaneous	0.629988
GTEX-N7MS-0326-SM-4E3K2	AdiposeSC	AdiposeSubcutaneous	0.630163
GTEX-1B97I-1726-SM-7939V	AdiposeSC	AdiposeSubcutaneous	0.630812
GTEX-13SLW-0226-SM-5S2NA	AdiposeSC	AdiposeSubcutaneous	0.631467
GTEX-SNOS-1426-SM-32PLY	AdiposeSC	AdiposeSubcutaneous	0.631648
GTEX-Q2AH-1726-SM-3NB2B	AdiposeSC	AdiposeSubcutaneous	0.63251
GTEX-147F3-0626-SM-5NQ9I	AdiposeSC	AdiposeSubcutaneous	0.633904
GTEX-14H4A-1026-SM-62LDY	AdiposeSC	AdiposeSubcutaneous	0.633989
GTEX-PLZ4-0226-SM-5SI7M	AdiposeSC	AdiposeSubcutaneous	0.634229
GTEX-131YS-0226-SM-5IJEH	AdiposeSC	AdiposeSubcutaneous	0.634411
GTEX-13G51-2626-SM-5LZYW	AdiposeSC	AdiposeSubcutaneous	0.635841
GTEX-WL46-0326-SM-3LK6Y	AdiposeSC	AdiposeSubcutaneous	0.635914
GTEX-132QS-2526-SM-62LFJ	AdiposeSC	AdiposeSubcutaneous	0.637094
GTEX-111YS-2426-SM-5GZZQ	AdiposeSC	AdiposeSubcutaneous	0.637216
GTEX-13OW8-1226-SM-5K7XD	AdiposeSC	AdiposeSubcutaneous	0.638902
GTEX-OXRL-0226-SM-3NB18	AdiposeSC	AdiposeSubcutaneous	0.638946
GTEX-13FTW-2526-SM-5IJC8	AdiposeSC	AdiposeSubcutaneous	0.639044
GTEX-1C475-1926-SM-7DUFV	AdiposeSC	AdiposeSubcutaneous	0.639665
GTEX-12KS4-0426-SM-5EQMC	AdiposeSC	AdiposeSubcutaneous	0.639878
GTEX-1AX9J-0326-SM-73KXY	AdiposeSC	AdiposeSubcutaneous	0.6403
GTEX-1AMFI-2126-SM-731BT	AdiposeSC	AdiposeSubcutaneous	0.640601
GTEX-XGQ4-2226-SM-4AT4Y	AdiposeSC	AdiposeSubcutaneous	0.641198
GTEX-14JG1-0526-SM-6LLHW	AdiposeSC	AdiposeSubcutaneous	0.641295
GTEX-18D9A-2026-SM-718BL	AdiposeSC	AdiposeSubcutaneous	0.642579
GTEX-14PJ3-1926-SM-62LEY	AdiposeSC	AdiposeSubcutaneous	0.642737
GTEX-ZVP2-1826-SM-5GU62	AdiposeSC	AdiposeSubcutaneous	0.643763
GTEX-14BIL-0226-SM-5SI9E	AdiposeSC	AdiposeSubcutaneous	0.645461
GTEX-TKQ1-1126-SM-4GIAZ	AdiposeSC	AdiposeSubcutaneous	0.645924
GTEX-1B8KE-2526-SM-73KYQ	AdiposeSC	AdiposeSubcutaneous	0.646311
GTEX-ZZ64-1626-SM-5E43W	AdiposeSC	AdiposeSubcutaneous	0.647876
GTEX-WH7G-2226-SM-3NMBN	AdiposeSC	AdiposeSubcutaneous	0.648507
GTEX-13FH7-2226-SM-5IJD4	AdiposeSC	AdiposeSubcutaneous	0.648986
GTEX-PLZ6-1326-SM-3NB24	AdiposeSC	AdiposeSubcutaneous	0.651343
GTEX-14PN3-2526-SM-6EU15	AdiposeSC	AdiposeSubcutaneous	0.651359
GTEX-11P7K-2026-SM-5GU74	AdiposeSC	AdiposeSubcutaneous	0.651886
GTEX-13RTJ-2526-SM-5S2Q3	AdiposeSC	AdiposeSubcutaneous	0.652702
GTEX-14BMU-2126-SM-5S2TS	AdiposeSC	AdiposeSubcutaneous	0.652847
GTEX-16XZY-2526-SM-7DHL2	AdiposeSC	AdiposeSubcutaneous	0.654253
GTEX-POMQ-2326-SM-5S2VS	AdiposeSC	AdiposeSubcutaneous	0.655876
GTEX-117YX-2226-SM-5EGJJ	AdiposeSC	AdiposeSubcutaneous	0.65735
GTEX-ZYY3-0226-SM-5E45M	AdiposeSC	AdiposeSubcutaneous	0.657356
GTEX-18A66-0326-SM-718BE	AdiposeSC	AdiposeSubcutaneous	0.659795
GTEX-11ZTT-2526-SM-5EQM9	AdiposeSC	AdiposeSubcutaneous	0.663902
GTEX-147GR-0426-SM-5S2OL	AdiposeSC	AdiposeSubcutaneous	0.664534
GTEX-12C56-1626-SM-5FQUO	AdiposeSC	AdiposeSubcutaneous	0.666265
GTEX-WVJS-0226-SM-4MVOU	AdiposeSC	AdiposeSubcutaneous	0.667528
GTEX-X261-0226-SM-3NMD2	AdiposeSC	AdiposeSubcutaneous	0.66787
GTEX-O5YT-0226-SM-32PK5	AdiposeSC	AdiposeSubcutaneous	0.673132
GTEX-1399U-2426-SM-5K7XB	AdiposeSC	AdiposeSubcutaneous	0.676779
GTEX-14ICK-0326-SM-6LLIZ	AdiposeSC	AdiposeSubcutaneous	0.677023
GTEX-PSDG-0326-SM-48TCP	AdiposeSC	AdiposeSubcutaneous	0.683627
GTEX-WWTW-1326-SM-4MVNT	AdiposeVisceral	AdiposeVisceral	0.0953534
GTEX-WL46-2026-SM-3LK7U	AdiposeVisceral	AdiposeVisceral	0.185072
GTEX-14753-2526-SM-5LU97	AdiposeVisceral	AdiposeVisceral	0.185545
GTEX-14E6C-1226-SM-5ZZUN	AdiposeVisceral	AdiposeVisceral	0.188824
GTEX-1A8G7-1226-SM-73KYP	AdiposeVisceral	AdiposeVisceral	0.202454
GTEX-1212Z-0526-SM-5FQSQ	AdiposeVisceral	AdiposeVisceral	0.202989
GTEX-147JS-1026-SM-5S2MP	AdiposeVisceral	AdiposeVisceral	0.209452
GTEX-132NY-1126-SM-5PNVE	AdiposeVisceral	AdiposeVisceral	0.218511
GTEX-ZAB5-1126-SM-5Q5AD	AdiposeVisceral	AdiposeVisceral	0.223382
GTEX-ZF28-1426-SM-5S2OG	AdiposeVisceral	AdiposeVisceral	0.230005
GTEX-1BAJH-2126-SM-7EWFB	AdiposeVisceral	AdiposeVisceral	0.23355
GTEX-17F97-1226-SM-79OJT	AdiposeVisceral	AdiposeVisceral	0.242317
GTEX-113JC-0726-SM-5GZZR	AdiposeVisceral	AdiposeVisceral	0.244835
GTEX-14AS3-0426-SM-5QGQK	AdiposeVisceral	AdiposeVisceral	0.246198
GTEX-ZF3C-1026-SM-5S2OC	AdiposeVisceral	AdiposeVisceral	0.251145
GTEX-13PL7-1226-SM-5SIAR	AdiposeVisceral	AdiposeVisceral	0.253608
GTEX-ZPCL-1026-SM-5GCOX	AdiposeVisceral	AdiposeVisceral	0.254621
GTEX-15CHQ-1126-SM-686YY	AdiposeVisceral	AdiposeVisceral	0.255691
GTEX-11WQK-1526-SM-5EGKN	AdiposeVisceral	AdiposeVisceral	0.259166
GTEX-13PL6-0926-SM-5KLYY	AdiposeVisceral	AdiposeVisceral	0.25939
GTEX-16AAH-1526-SM-7LT9W	AdiposeVisceral	AdiposeVisceral	0.259462
GTEX-145LT-1526-SM-5O98P	AdiposeVisceral	AdiposeVisceral	0.267412
GTEX-14BIM-1626-SM-7EWD2	AdiposeVisceral	AdiposeVisceral	0.268753
GTEX-1A8G6-2026-SM-73KYC	AdiposeVisceral	AdiposeVisceral	0.269281
GTEX-ZQG8-1026-SM-51MR9	AdiposeVisceral	AdiposeVisceral	0.277599
GTEX-WFJO-1026-SM-3GIKL	AdiposeVisceral	AdiposeVisceral	0.277978
GTEX-1A3MV-0626-SM-731CH	AdiposeVisceral	AdiposeVisceral	0.279783
GTEX-11NUK-2026-SM-5PNVZ	AdiposeVisceral	AdiposeVisceral	0.281771
GTEX-1AMFI-1026-SM-73KYM	AdiposeVisceral	AdiposeVisceral	0.284486
GTEX-17F96-0726-SM-793CB	AdiposeVisceral	AdiposeVisceral	0.289791
GTEX-XV7Q-1726-SM-4BRUU	AdiposeVisceral	AdiposeVisceral	0.290459
GTEX-1EU9M-1126-SM-793DE	AdiposeVisceral	AdiposeVisceral	0.290661
GTEX-X585-2526-SM-4QAS1	AdiposeVisceral	AdiposeVisceral	0.294358
GTEX-ZYFG-1426-SM-5GICS	AdiposeVisceral	AdiposeVisceral	0.300309
GTEX-16NPV-0626-SM-7IGOR	AdiposeVisceral	AdiposeVisceral	0.300767
GTEX-1AX9K-0926-SM-7939G	AdiposeVisceral	AdiposeVisceral	0.30255
GTEX-ZGAY-1326-SM-5S2NS	AdiposeVisceral	AdiposeVisceral	0.310345
GTEX-14PJO-1626-SM-69LPQ	AdiposeVisceral	AdiposeVisceral	0.311589
GTEX-W5X1-1426-SM-3GIKH	AdiposeVisceral	AdiposeVisceral	0.31803
GTEX-1CAMR-0326-SM-793AH	AdiposeVisceral	AdiposeVisceral	0.318179
GTEX-13YAN-1126-SM-5TDC7	AdiposeVisceral	AdiposeVisceral	0.321087
GTEX-13CF3-1126-SM-5LZXB	AdiposeVisceral	AdiposeVisceral	0.324442
GTEX-13FHO-2026-SM-5J1OA	AdiposeVisceral	AdiposeVisceral	0.326409
GTEX-UTHO-1826-SM-3GAFE	AdiposeVisceral	AdiposeVisceral	0.334479
GTEX-1B8KE-0826-SM-72D6S	AdiposeVisceral	AdiposeVisceral	0.337192
GTEX-117YX-0726-SM-5GIET	AdiposeVisceral	AdiposeVisceral	0.350122
GTEX-17HII-0826-SM-7DUFH	AdiposeVisceral	AdiposeVisceral	0.370092
GTEX-16GPK-1326-SM-7KUE4	AdiposeVisceral	AdiposeVisceral	0.37703
GTEX-1C6VS-1826-SM-73KXN	AdiposeVisceral	AdiposeVisceral	0.381931
GTEX-17HHY-1026-SM-7LG5E	AdiposeVisceral	AdiposeVisceral	0.388977
GTEX-11OF3-0826-SM-5BC51	AdiposeVisceral	AdiposeVisceral	0.391093
GTEX-16XZZ-1626-SM-7KUEC	AdiposeVisceral	AdiposeVisceral	0.398816
GTEX-ZC5H-1626-SM-5HL7L	AdiposeVisceral	AdiposeVisceral	0.400149
GTEX-ZTX8-0726-SM-59HL9	AdiposeVisceral	AdiposeVisceral	0.400796
GTEX-13FXS-1326-SM-62LFR	AdiposeVisceral	AdiposeVisceral	0.402951
GTEX-1C6VR-1126-SM-7EPHD	AdiposeVisceral	AdiposeVisceral	0.404214
GTEX-15SKB-1626-SM-6PAL6	AdiposeVisceral	AdiposeVisceral	0.410047
GTEX-1A32A-0926-SM-718AB	AdiposeVisceral	AdiposeVisceral	0.410519
GTEX-1B933-1326-SM-7939U	AdiposeVisceral	AdiposeVisceral	0.411022
GTEX-15DZA-0626-SM-6PANC	AdiposeVisceral	AdiposeVisceral	0.415184
GTEX-1EN7A-1626-SM-79OLV	AdiposeVisceral	AdiposeVisceral	0.416368
GTEX-ZAJG-1626-SM-5HL7I	AdiposeVisceral	AdiposeVisceral	0.417449
GTEX-1EWIQ-2526-SM-7EPIJ	AdiposeVisceral	AdiposeVisceral	0.418394
GTEX-14PK6-0926-SM-62LF4	AdiposeVisceral	AdiposeVisceral	0.418545
GTEX-Y9LG-1226-SM-4VBQA	AdiposeVisceral	AdiposeVisceral	0.422556
GTEX-1A3MX-0826-SM-72D64	AdiposeVisceral	AdiposeVisceral	0.423141
GTEX-1117F-1326-SM-5EGHH	AdiposeVisceral	AdiposeVisceral	0.424211
GTEX-131XH-0826-SM-5GCN8	AdiposeVisceral	AdiposeVisceral	0.42436
GTEX-145MF-1026-SM-5Q5EQ	AdiposeVisceral	AdiposeVisceral	0.430934
GTEX-15D1Q-1326-SM-69LOA	AdiposeVisceral	AdiposeVisceral	0.431483
GTEX-12WSF-1526-SM-6PAN6	AdiposeVisceral	AdiposeVisceral	0.432321
GTEX-13X6J-1926-SM-5TDCU	AdiposeVisceral	AdiposeVisceral	0.433599
GTEX-ZA64-0926-SM-5HL7H	AdiposeVisceral	AdiposeVisceral	0.43415
GTEX-13NYS-0726-SM-5J1OR	AdiposeVisceral	AdiposeVisceral	0.436247
GTEX-117YW-0826-SM-5H11O	AdiposeVisceral	AdiposeVisceral	0.443895
GTEX-12ZZW-2326-SM-5DUW2	AdiposeVisceral	AdiposeVisceral	0.444938
GTEX-WEY5-1326-SM-3GILS	AdiposeVisceral	AdiposeVisceral	0.445704
GTEX-14DAR-0426-SM-664MW	AdiposeVisceral	AdiposeVisceral	0.446758
GTEX-VUSG-1426-SM-3GIJN	AdiposeVisceral	AdiposeVisceral	0.448097
GTEX-ZF2S-1526-SM-5S2OO	AdiposeVisceral	AdiposeVisceral	0.448413
GTEX-13112-1126-SM-5GCMY	AdiposeVisceral	AdiposeVisceral	0.44856
GTEX-13O3P-0926-SM-5IFFI	AdiposeVisceral	AdiposeVisceral	0.448955
GTEX-WOFM-0726-SM-3MJF8	AdiposeVisceral	AdiposeVisceral	0.449504
GTEX-11ZUS-1826-SM-5FQTR	AdiposeVisceral	AdiposeVisceral	0.451759
GTEX-15ER7-1026-SM-7KUMD	AdiposeVisceral	AdiposeVisceral	0.451896
GTEX-14PN3-0326-SM-6EU1X	AdiposeVisceral	AdiposeVisceral	0.452843
GTEX-YJ89-1926-SM-5IFJ6	AdiposeVisceral	AdiposeVisceral	0.452915
GTEX-1CB4G-2126-SM-7IGQ8	AdiposeVisceral	AdiposeVisceral	0.453315
GTEX-ZV7C-0826-SM-59HK8	AdiposeVisceral	AdiposeVisceral	0.454199
GTEX-12ZZX-1726-SM-5BC63	AdiposeVisceral	AdiposeVisceral	0.454312
GTEX-18A6Q-1026-SM-7LT9S	AdiposeVisceral	AdiposeVisceral	0.454942
GTEX-18465-1826-SM-731BB	AdiposeVisceral	AdiposeVisceral	0.455207
GTEX-1445S-2426-SM-79ON2	AdiposeVisceral	AdiposeVisceral	0.455547
GTEX-1AMEY-0526-SM-72D62	AdiposeVisceral	AdiposeVisceral	0.456073
GTEX-11DXZ-1426-SM-5H12A	AdiposeVisceral	AdiposeVisceral	0.458823
GTEX-11NV4-1426-SM-5BC4W	AdiposeVisceral	AdiposeVisceral	0.458986
GTEX-15CHC-0826-SM-686YW	AdiposeVisceral	AdiposeVisceral	0.45995
GTEX-15G19-1126-SM-7KUEL	AdiposeVisceral	AdiposeVisceral	0.460073
GTEX-139TU-1426-SM-5LZY9	AdiposeVisceral	AdiposeVisceral	0.461055
GTEX-13OVK-0326-SM-7KUEJ	AdiposeVisceral	AdiposeVisceral	0.463221
GTEX-ZVP2-0226-SM-57WBD	AdiposeVisceral	AdiposeVisceral	0.46449
GTEX-14BIL-2426-SM-5QGQR	AdiposeVisceral	AdiposeVisceral	0.464967
GTEX-13W46-1226-SM-5SIAS	AdiposeVisceral	AdiposeVisceral	0.465541
GTEX-139D8-1626-SM-5IJFZ	AdiposeVisceral	AdiposeVisceral	0.466138
GTEX-14ABY-1926-SM-62LDJ	AdiposeVisceral	AdiposeVisceral	0.46632
GTEX-WHPG-0626-SM-3NMBD	AdiposeVisceral	AdiposeVisceral	0.466355
GTEX-11DYG-2026-SM-5EGGX	AdiposeVisceral	AdiposeVisceral	0.46688
GTEX-18QFQ-1326-SM-731CF	AdiposeVisceral	AdiposeVisceral	0.467329
GTEX-X3Y1-0926-SM-3P5YT	AdiposeVisceral	AdiposeVisceral	0.467489
GTEX-17EVQ-0626-SM-7KFTB	AdiposeVisceral	AdiposeVisceral	0.468942
GTEX-14PJ2-1426-SM-62LFF	AdiposeVisceral	AdiposeVisceral	0.468951
GTEX-Y8E4-1226-SM-5IFIM	AdiposeVisceral	AdiposeVisceral	0.468997
GTEX-XQ3S-2426-SM-4WAYB	AdiposeVisceral	AdiposeVisceral	0.47
GTEX-11DXY-0326-SM-5H12F	AdiposeVisceral	AdiposeVisceral	0.470096
GTEX-13OW7-1126-SM-5K7V6	AdiposeVisceral	AdiposeVisceral	0.470645
GTEX-13FH7-1926-SM-5J2OL	AdiposeVisceral	AdiposeVisceral	0.470972
GTEX-ZF29-0826-SM-5S2NP	AdiposeVisceral	AdiposeVisceral	0.471664
GTEX-132AR-0526-SM-5J2MJ	AdiposeVisceral	AdiposeVisceral	0.471912
GTEX-15EOM-2326-SM-7KUMV	AdiposeVisceral	AdiposeVisceral	0.471985
GTEX-ZVT2-0226-SM-5GIE3	AdiposeVisceral	AdiposeVisceral	0.472204
GTEX-13NZ9-2026-SM-5KM1U	AdiposeVisceral	AdiposeVisceral	0.473623
GTEX-17JCI-1626-SM-7EPGZ	AdiposeVisceral	AdiposeVisceral	0.473745
GTEX-178AV-0626-SM-6PAM1	AdiposeVisceral	AdiposeVisceral	0.473838
GTEX-XOT4-0826-SM-4B66Y	AdiposeVisceral	AdiposeVisceral	0.475478
GTEX-13OW6-2426-SM-5K7WO	AdiposeVisceral	AdiposeVisceral	0.477276
GTEX-WFON-1226-SM-3TW8F	AdiposeVisceral	AdiposeVisceral	0.4788
GTEX-17F9Y-0726-SM-7LT9G	AdiposeVisceral	AdiposeVisceral	0.479895
GTEX-13QBU-1326-SM-5LU4K	AdiposeVisceral	AdiposeVisceral	0.480218
GTEX-XGQ4-1026-SM-4AT4L	AdiposeVisceral	AdiposeVisceral	0.481785
GTEX-13PVQ-2226-SM-5L3G9	AdiposeVisceral	AdiposeVisceral	0.483484
GTEX-15SHW-1726-SM-6LPJ2	AdiposeVisceral	AdiposeVisceral	0.483581
GTEX-15DCZ-1726-SM-69LPX	AdiposeVisceral	AdiposeVisceral	0.485096
GTEX-1CAV2-0226-SM-7IGPQ	AdiposeVisceral	AdiposeVisceral	0.485477
GTEX-12WSC-1726-SM-5GCN3	AdiposeVisceral	AdiposeVisceral	0.485827
GTEX-XLM4-1026-SM-4AT51	AdiposeVisceral	AdiposeVisceral	0.486979
GTEX-17MFQ-1126-SM-7LT9O	AdiposeVisceral	AdiposeVisceral	0.486993
GTEX-ZEX8-1226-SM-5S2OK	AdiposeVisceral	AdiposeVisceral	0.487098
GTEX-11EQ9-1126-SM-5987I	AdiposeVisceral	AdiposeVisceral	0.488075
GTEX-14BMV-1626-SM-73KVQ	AdiposeVisceral	AdiposeVisceral	0.488132
GTEX-15SHU-2326-SM-7KUMC	AdiposeVisceral	AdiposeVisceral	0.488571
GTEX-1C6VQ-1526-SM-73KU9	AdiposeVisceral	AdiposeVisceral	0.489671
GTEX-XQ8I-1426-SM-4BOPW	AdiposeVisceral	AdiposeVisceral	0.489687
GTEX-18A7B-1226-SM-718AU	AdiposeVisceral	AdiposeVisceral	0.489723
GTEX-ZYFC-1826-SM-5GZZA	AdiposeVisceral	AdiposeVisceral	0.489775
GTEX-132Q8-1726-SM-5EGK8	AdiposeVisceral	AdiposeVisceral	0.490265
GTEX-1CB4E-0826-SM-793CS	AdiposeVisceral	AdiposeVisceral	0.491088
GTEX-Y5V5-0226-SM-5S2N8	AdiposeVisceral	AdiposeVisceral	0.49202
GTEX-YEC4-0926-SM-5PNXY	AdiposeVisceral	AdiposeVisceral	0.492917
GTEX-14E7W-2326-SM-69LQC	AdiposeVisceral	AdiposeVisceral	0.493501
GTEX-ZT9X-0926-SM-5O9C4	AdiposeVisceral	AdiposeVisceral	0.496705
GTEX-14PJ4-0126-SM-62LEZ	AdiposeVisceral	AdiposeVisceral	0.496847
GTEX-14DAQ-2526-SM-5RQIO	AdiposeVisceral	AdiposeVisceral	0.497304
GTEX-11ZTS-1326-SM-5EQMA	AdiposeVisceral	AdiposeVisceral	0.49743
GTEX-13OW8-0326-SM-5L3FB	AdiposeVisceral	AdiposeVisceral	0.4976
GTEX-ZPU1-1226-SM-5HL71	AdiposeVisceral	AdiposeVisceral	0.497647
GTEX-13113-1126-SM-5LZU9	AdiposeVisceral	AdiposeVisceral	0.498695
GTEX-13VXT-0926-SM-5LU5K	AdiposeVisceral	AdiposeVisceral	0.498839
GTEX-WH7G-1126-SM-3NMBK	AdiposeVisceral	AdiposeVisceral	0.5005
GTEX-WYBS-1026-SM-4ONCY	AdiposeVisceral	AdiposeVisceral	0.501031
GTEX-ZUA1-2126-SM-57YRB	AdiposeVisceral	AdiposeVisceral	0.501385
GTEX-11P82-0326-SM-5HL51	AdiposeVisceral	AdiposeVisceral	0.501434
GTEX-17EVP-1426-SM-79OMN	AdiposeVisceral	AdiposeVisceral	0.501945
GTEX-13N2G-1926-SM-5J1O3	AdiposeVisceral	AdiposeVisceral	0.502676
GTEX-WY7C-0926-SM-3NB34	AdiposeVisceral	AdiposeVisceral	0.502707
GTEX-13G51-0526-SM-5IJCQ	AdiposeVisceral	AdiposeVisceral	0.502847
GTEX-13O3Q-1126-SM-5K7YK	AdiposeVisceral	AdiposeVisceral	0.503124
GTEX-11GSO-0226-SM-5A5LV	AdiposeVisceral	AdiposeVisceral	0.503423
GTEX-11GS4-1026-SM-5N9DE	AdiposeVisceral	AdiposeVisceral	0.503857
GTEX-131XF-0726-SM-5GIE5	AdiposeVisceral	AdiposeVisceral	0.504337
GTEX-11DXX-2026-SM-5EGJL	AdiposeVisceral	AdiposeVisceral	0.504706
GTEX-1AYCT-1126-SM-79OO8	AdiposeVisceral	AdiposeVisceral	0.504802
GTEX-12WSI-1526-SM-5GCNM	AdiposeVisceral	AdiposeVisceral	0.504929
GTEX-14B4R-0526-SM-5QGQT	AdiposeVisceral	AdiposeVisceral	0.505977
GTEX-13NZB-0826-SM-5K7X5	AdiposeVisceral	AdiposeVisceral	0.5063
GTEX-13U4I-1726-SM-5J1MF	AdiposeVisceral	AdiposeVisceral	0.506666
GTEX-111YS-1326-SM-5EGGK	AdiposeVisceral	AdiposeVisceral	0.507446
GTEX-1192X-1526-SM-5H11I	AdiposeVisceral	AdiposeVisceral	0.507622
GTEX-11VI4-1226-SM-5EQMP	AdiposeVisceral	AdiposeVisceral	0.507725
GTEX-11EM3-1126-SM-5A5KM	AdiposeVisceral	AdiposeVisceral	0.508297
GTEX-14A6H-1026-SM-5SIAZ	AdiposeVisceral	AdiposeVisceral	0.508716
GTEX-13O61-1926-SM-5KM1R	AdiposeVisceral	AdiposeVisceral	0.508788
GTEX-111CU-1026-SM-5EGIL	AdiposeVisceral	AdiposeVisceral	0.509098
GTEX-ZYW4-2226-SM-5GZYG	AdiposeVisceral	AdiposeVisceral	0.509307
GTEX-X8HC-2326-SM-4QAS4	AdiposeVisceral	AdiposeVisceral	0.50981
GTEX-ZDTT-0526-SM-5HL4M	AdiposeVisceral	AdiposeVisceral	0.509853
GTEX-13N1W-1226-SM-5K7UM	AdiposeVisceral	AdiposeVisceral	0.510526
GTEX-ZYVF-1026-SM-5E44V	AdiposeVisceral	AdiposeVisceral	0.511008
GTEX-14PJ3-0726-SM-69LQE	AdiposeVisceral	AdiposeVisceral	0.511019
GTEX-13IVO-2426-SM-5K7V9	AdiposeVisceral	AdiposeVisceral	0.511234
GTEX-1399T-1326-SM-5PNVH	AdiposeVisceral	AdiposeVisceral	0.511254
GTEX-18A7A-0926-SM-7LT8H	AdiposeVisceral	AdiposeVisceral	0.512108
GTEX-ZDTS-1826-SM-5S2N6	AdiposeVisceral	AdiposeVisceral	0.513864
GTEX-1EH9U-1326-SM-79OM3	AdiposeVisceral	AdiposeVisceral	0.514126
GTEX-13X6I-1526-SM-5SIAC	AdiposeVisceral	AdiposeVisceral	0.515168
GTEX-144GM-0626-SM-79OKY	AdiposeVisceral	AdiposeVisceral	0.51519
GTEX-WK11-2426-SM-3NMAA	AdiposeVisceral	AdiposeVisceral	0.515731
GTEX-17KNJ-0426-SM-718AK	AdiposeVisceral	AdiposeVisceral	0.515809
GTEX-14PKU-0226-SM-6EU16	AdiposeVisceral	AdiposeVisceral	0.516476
GTEX-1B932-1726-SM-793A5	AdiposeVisceral	AdiposeVisceral	0.517064
GTEX-14PJM-1226-SM-686Z7	AdiposeVisceral	AdiposeVisceral	0.517339
GTEX-1AYD5-0126-SM-7DUG5	AdiposeVisceral	AdiposeVisceral	0.517765
GTEX-Y5V6-0626-SM-4WWFY	AdiposeVisceral	AdiposeVisceral	0.518023
GTEX-15RIE-0126-SM-7KUF8	AdiposeVisceral	AdiposeVisceral	0.518612
GTEX-14PJN-0626-SM-6EU13	AdiposeVisceral	AdiposeVisceral	0.518859
GTEX-ZVE2-1826-SM-51MRZ	AdiposeVisceral	AdiposeVisceral	0.519004
GTEX-13FTW-0426-SM-5K7X2	AdiposeVisceral	AdiposeVisceral	0.519237
GTEX-13S86-0926-SM-5SI6I	AdiposeVisceral	AdiposeVisceral	0.519271
GTEX-139YR-0326-SM-5J1MC	AdiposeVisceral	AdiposeVisceral	0.519545
GTEX-1128S-0926-SM-5GZZU	AdiposeVisceral	AdiposeVisceral	0.520571
GTEX-14JIY-1426-SM-6EU29	AdiposeVisceral	AdiposeVisceral	0.520687
GTEX-169BO-0426-SM-7EPI1	AdiposeVisceral	AdiposeVisceral	0.521659
GTEX-146FH-2026-SM-5SI9I	AdiposeVisceral	AdiposeVisceral	0.522014
GTEX-18D9U-0426-SM-731AN	AdiposeVisceral	AdiposeVisceral	0.522168
GTEX-WYVS-0626-SM-4SOJY	AdiposeVisceral	AdiposeVisceral	0.522652
GTEX-14E6D-1326-SM-62LES	AdiposeVisceral	AdiposeVisceral	0.522861
GTEX-14C39-0826-SM-5TDDU	AdiposeVisceral	AdiposeVisceral	0.524205
GTEX-ZPIC-0726-SM-57WFM	AdiposeVisceral	AdiposeVisceral	0.524637
GTEX-17HGU-1726-SM-79OKM	AdiposeVisceral	AdiposeVisceral	0.524886
GTEX-12WSG-0426-SM-5FQSE	AdiposeVisceral	AdiposeVisceral	0.525002
GTEX-12696-1826-SM-5EGJS	AdiposeVisceral	AdiposeVisceral	0.526048
GTEX-ZXES-0926-SM-5E43O	AdiposeVisceral	AdiposeVisceral	0.526596
GTEX-ZVZP-1126-SM-5GICU	AdiposeVisceral	AdiposeVisceral	0.527628
GTEX-ZXG5-1626-SM-59HJK	AdiposeVisceral	AdiposeVisceral	0.52776
GTEX-ZTSS-1026-SM-5985N	AdiposeVisceral	AdiposeVisceral	0.527934
GTEX-14JG6-0526-SM-6LLIH	AdiposeVisceral	AdiposeVisceral	0.527967
GTEX-ZQUD-0526-SM-57WG4	AdiposeVisceral	AdiposeVisceral	0.528585
GTEX-13PDP-1226-SM-5K7TW	AdiposeVisceral	AdiposeVisceral	0.529145
GTEX-Y111-0926-SM-4SOIU	AdiposeVisceral	AdiposeVisceral	0.530043
GTEX-XYKS-1826-SM-4E3JV	AdiposeVisceral	AdiposeVisceral	0.53012
GTEX-12584-2126-SM-5FQUM	AdiposeVisceral	AdiposeVisceral	0.531042
GTEX-ZAB4-1426-SM-5CVN6	AdiposeVisceral	AdiposeVisceral	0.531532
GTEX-131XE-2026-SM-5LZW1	AdiposeVisceral	AdiposeVisceral	0.53251
GTEX-1B8SF-1726-SM-73KZ5	AdiposeVisceral	AdiposeVisceral	0.532681
GTEX-1AX8Z-1626-SM-73KWD	AdiposeVisceral	AdiposeVisceral	0.532897
GTEX-ZTPG-2326-SM-57WFL	AdiposeVisceral	AdiposeVisceral	0.533005
GTEX-13N11-1826-SM-5IJDS	AdiposeVisceral	AdiposeVisceral	0.533356
GTEX-1211K-1226-SM-5EQ4N	AdiposeVisceral	AdiposeVisceral	0.533858
GTEX-13PVR-0526-SM-5S2OB	AdiposeVisceral	AdiposeVisceral	0.534382
GTEX-15DYW-1526-SM-7KUEP	AdiposeVisceral	AdiposeVisceral	0.535024
GTEX-145MI-0826-SM-5SI95	AdiposeVisceral	AdiposeVisceral	0.535487
GTEX-13OVJ-0926-SM-5K7U1	AdiposeVisceral	AdiposeVisceral	0.53615
GTEX-16NGA-0526-SM-731AJ	AdiposeVisceral	AdiposeVisceral	0.536209
GTEX-1B8SG-1426-SM-7EWEM	AdiposeVisceral	AdiposeVisceral	0.536637
GTEX-XMK1-0926-SM-4B66X	AdiposeVisceral	AdiposeVisceral	0.536844
GTEX-13111-0626-SM-5LZVR	AdiposeVisceral	AdiposeVisceral	0.537129
GTEX-YEC3-0926-SM-5Q5AC	AdiposeVisceral	AdiposeVisceral	0.537331
GTEX-YECK-1426-SM-5IFHE	AdiposeVisceral	AdiposeVisceral	0.537538
GTEX-1399S-1426-SM-5PNYQ	AdiposeVisceral	AdiposeVisceral	0.5376
GTEX-14PN4-1426-SM-6LLJ4	AdiposeVisceral	AdiposeVisceral	0.537938
GTEX-16NPX-1026-SM-6PAM7	AdiposeVisceral	AdiposeVisceral	0.538606
GTEX-13D11-0526-SM-5LZYM	AdiposeVisceral	AdiposeVisceral	0.540059
GTEX-UPK5-1826-SM-3GAEB	AdiposeVisceral	AdiposeVisceral	0.542553
GTEX-17F9E-1326-SM-7DHL4	AdiposeVisceral	AdiposeVisceral	0.542746
GTEX-Y114-1326-SM-4TT9A	AdiposeVisceral	AdiposeVisceral	0.54297
GTEX-XBED-1326-SM-4AT4F	AdiposeVisceral	AdiposeVisceral	0.54531
GTEX-12WSM-0626-SM-5GCOK	AdiposeVisceral	AdiposeVisceral	0.545632
GTEX-ZLV1-0926-SM-5S2MR	AdiposeVisceral	AdiposeVisceral	0.545987
GTEX-18A67-1326-SM-7LT8V	AdiposeVisceral	AdiposeVisceral	0.546935
GTEX-1AX9I-1726-SM-731BX	AdiposeVisceral	AdiposeVisceral	0.547001
GTEX-1313W-1626-SM-5J1OE	AdiposeVisceral	AdiposeVisceral	0.547169
GTEX-ZYT6-2126-SM-5GZZ4	AdiposeVisceral	AdiposeVisceral	0.547595
GTEX-ZT9W-1026-SM-57WG5	AdiposeVisceral	AdiposeVisceral	0.547835
GTEX-146FR-0226-SM-5Q5F6	AdiposeVisceral	AdiposeVisceral	0.548009
GTEX-145LU-1226-SM-5LU9B	AdiposeVisceral	AdiposeVisceral	0.548151
GTEX-ZZ64-0626-SM-5GZWR	AdiposeVisceral	AdiposeVisceral	0.549354
GTEX-11PRG-1526-SM-5HL6Z	AdiposeVisceral	AdiposeVisceral	0.550441
GTEX-16BQI-1126-SM-7KULF	AdiposeVisceral	AdiposeVisceral	0.5506
GTEX-14E6E-0226-SM-7DUEF	AdiposeVisceral	AdiposeVisceral	0.551103
GTEX-U8XE-1926-SM-3DB98	AdiposeVisceral	AdiposeVisceral	0.551874
GTEX-13W3W-1126-SM-5L3DO	AdiposeVisceral	AdiposeVisceral	0.55219
GTEX-1B996-1226-SM-73KWZ	AdiposeVisceral	AdiposeVisceral	0.552258
GTEX-12KS4-1526-SM-5EQ6E	AdiposeVisceral	AdiposeVisceral	0.552383
GTEX-133LE-0926-SM-5P9J1	AdiposeVisceral	AdiposeVisceral	0.552998
GTEX-12BJ1-0826-SM-5EQ5P	AdiposeVisceral	AdiposeVisceral	0.554899
GTEX-YFCO-1126-SM-5S2N9	AdiposeVisceral	AdiposeVisceral	0.555181
GTEX-145ME-0726-SM-5O9A3	AdiposeVisceral	AdiposeVisceral	0.555397
GTEX-XUZC-1126-SM-4BOPZ	AdiposeVisceral	AdiposeVisceral	0.555756
GTEX-WRHK-0826-SM-3MJFG	AdiposeVisceral	AdiposeVisceral	0.556069
GTEX-17F98-0326-SM-7DHLH	AdiposeVisceral	AdiposeVisceral	0.55652
GTEX-ZDXO-2326-SM-5LU9W	AdiposeVisceral	AdiposeVisceral	0.557297
GTEX-13S7M-0826-SM-5QGQX	AdiposeVisceral	AdiposeVisceral	0.558282
GTEX-17GQL-0826-SM-731AM	AdiposeVisceral	AdiposeVisceral	0.558532
GTEX-144GN-0726-SM-5O98O	AdiposeVisceral	AdiposeVisceral	0.56005
GTEX-Y8LW-0926-SM-4VBQ8	AdiposeVisceral	AdiposeVisceral	0.560822
GTEX-11I78-0226-SM-5HL6R	AdiposeVisceral	AdiposeVisceral	0.561645
GTEX-ZE9C-1326-SM-5S2OW	AdiposeVisceral	AdiposeVisceral	0.562217
GTEX-WXYG-0926-SM-3NB2O	AdiposeVisceral	AdiposeVisceral	0.562905
GTEX-Z9EW-0826-SM-5HL9T	AdiposeVisceral	AdiposeVisceral	0.563089
GTEX-WHWD-0826-SM-3LK6R	AdiposeVisceral	AdiposeVisceral	0.56384
GTEX-14PJ5-0426-SM-5ZZW2	AdiposeVisceral	AdiposeVisceral	0.564413
GTEX-14PHW-1626-SM-6EU2H	AdiposeVisceral	AdiposeVisceral	0.564493
GTEX-18D9A-0726-SM-7LTA7	AdiposeVisceral	AdiposeVisceral	0.564511
GTEX-12WSL-1126-SM-5CVNK	AdiposeVisceral	AdiposeVisceral	0.565923
GTEX-XXEK-1426-SM-4BRW1	AdiposeVisceral	AdiposeVisceral	0.566324
GTEX-13JUV-0626-SM-5J1MQ	AdiposeVisceral	AdiposeVisceral	0.567308
GTEX-132QS-0826-SM-5K7WV	AdiposeVisceral	AdiposeVisceral	0.56733
GTEX-14BMU-0626-SM-73KZ6	AdiposeVisceral	AdiposeVisceral	0.567711
GTEX-1B97I-0526-SM-73KXE	AdiposeVisceral	AdiposeVisceral	0.570034
GTEX-ZE7O-1526-SM-5J1NH	AdiposeVisceral	AdiposeVisceral	0.570616
GTEX-11LCK-0326-SM-5A5M7	AdiposeVisceral	AdiposeVisceral	0.571047
GTEX-131YS-1726-SM-5HL7G	AdiposeVisceral	AdiposeVisceral	0.571214
GTEX-1AX9J-2226-SM-731CW	AdiposeVisceral	AdiposeVisceral	0.571437
GTEX-14C5O-0926-SM-793DM	AdiposeVisceral	AdiposeVisceral	0.571795
GTEX-ZDYS-2226-SM-5S2MI	AdiposeVisceral	AdiposeVisceral	0.571817
GTEX-1CB4F-1126-SM-79OLG	AdiposeVisceral	AdiposeVisceral	0.572212
GTEX-1122O-0926-SM-5N9C9	AdiposeVisceral	AdiposeVisceral	0.573214
GTEX-14PHX-1626-SM-69LQB	AdiposeVisceral	AdiposeVisceral	0.574117
GTEX-14ICL-0926-SM-5S2TU	AdiposeVisceral	AdiposeVisceral	0.574404
GTEX-13FTX-0626-SM-5J2NS	AdiposeVisceral	AdiposeVisceral	0.575085
GTEX-ZP4G-1326-SM-5EGIW	AdiposeVisceral	AdiposeVisceral	0.57543
GTEX-ZZPU-0326-SM-5N9BJ	AdiposeVisceral	AdiposeVisceral	0.575719
GTEX-13X6K-0726-SM-5LU2Z	AdiposeVisceral	AdiposeVisceral	0.576736
GTEX-13OVG-1326-SM-5K7Y3	AdiposeVisceral	AdiposeVisceral	0.576887
GTEX-13O21-3126-SM-5J1OI	AdiposeVisceral	AdiposeVisceral	0.577255
GTEX-11TT1-1926-SM-5PNYN	AdiposeVisceral	AdiposeVisceral	0.578983
GTEX-XBEW-1726-SM-4RGMA	AdiposeVisceral	AdiposeVisceral	0.579949
GTEX-1339X-0726-SM-5L3FF	AdiposeVisceral	AdiposeVisceral	0.580893
GTEX-11P7K-0826-SM-5BC5F	AdiposeVisceral	AdiposeVisceral	0.581309
GTEX-XBEC-1826-SM-4QASN	AdiposeVisceral	AdiposeVisceral	0.581513
GTEX-1C2JI-0826-SM-7EPHB	AdiposeVisceral	AdiposeVisceral	0.581562
GTEX-12WSK-1026-SM-5CVNR	AdiposeVisceral	AdiposeVisceral	0.581902
GTEX-13OVH-1126-SM-5K7YP	AdiposeVisceral	AdiposeVisceral	0.582589
GTEX-131XG-0126-SM-5K7UJ	AdiposeVisceral	AdiposeVisceral	0.584812
GTEX-13VXU-1026-SM-5KLZE	AdiposeVisceral	AdiposeVisceral	0.584889
GTEX-16MTA-1326-SM-6PALX	AdiposeVisceral	AdiposeVisceral	0.586552
GTEX-1C64O-1526-SM-7EWES	AdiposeVisceral	AdiposeVisceral	0.586778
GTEX-13RTK-0726-SM-5Q5EN	AdiposeVisceral	AdiposeVisceral	0.589271
GTEX-14E1K-0426-SM-5S2PF	AdiposeVisceral	AdiposeVisceral	0.59046
GTEX-XAJ8-0226-SM-4GIB2	AdiposeVisceral	AdiposeVisceral	0.59154
GTEX-14BIN-1226-SM-5S2OM	AdiposeVisceral	AdiposeVisceral	0.591579
GTEX-17MF6-1326-SM-79ONE	AdiposeVisceral	AdiposeVisceral	0.592579
GTEX-12WSA-1626-SM-5EGJV	AdiposeVisceral	AdiposeVisceral	0.59496
GTEX-WYJK-1426-SM-3NM8V	AdiposeVisceral	AdiposeVisceral	0.594973
GTEX-183FY-1226-SM-7DHLK	AdiposeVisceral	AdiposeVisceral	0.595507
GTEX-139T6-0526-SM-5IJC9	AdiposeVisceral	AdiposeVisceral	0.595523
GTEX-14ICK-1726-SM-6AJA5	AdiposeVisceral	AdiposeVisceral	0.596326
GTEX-13X6H-1726-SM-5Q5EH	AdiposeVisceral	AdiposeVisceral	0.59861
GTEX-ZG7Y-1626-SM-5S2NO	AdiposeVisceral	AdiposeVisceral	0.599271
GTEX-ZV6S-1626-SM-5NQ81	AdiposeVisceral	AdiposeVisceral	0.601742
GTEX-15EU6-1726-SM-6M48H	AdiposeVisceral	AdiposeVisceral	0.602014
GTEX-1B8KZ-1026-SM-73KYN	AdiposeVisceral	AdiposeVisceral	0.603893
GTEX-18D9B-1726-SM-7LTAP	AdiposeVisceral	AdiposeVisceral	0.604504
GTEX-15UKP-1426-SM-7KUDX	AdiposeVisceral	AdiposeVisceral	0.608428
GTEX-14PHY-1026-SM-62LEV	AdiposeVisceral	AdiposeVisceral	0.610101
GTEX-11XUK-1726-SM-5GU61	AdiposeVisceral	AdiposeVisceral	0.612516
GTEX-13OVL-0826-SM-5L3GV	AdiposeVisceral	AdiposeVisceral	0.613936
GTEX-11P81-0726-SM-5PNYH	AdiposeVisceral	AdiposeVisceral	0.621902
GTEX-17HHE-1526-SM-793AS	AdiposeVisceral	AdiposeVisceral	0.62516
GTEX-14C38-1026-SM-73KY7	AdiposeVisceral	AdiposeVisceral	0.626195
GTEX-145LV-1026-SM-5O9AE	AdiposeVisceral	AdiposeVisceral	0.630209
GTEX-ZLWG-0726-SM-5S2NG	AdiposeVisceral	AdiposeVisceral	0.632514
GTEX-Y5LM-0826-SM-4VDSW	AdiposeVisceral	AdiposeVisceral	0.634793
GTEX-12C56-0826-SM-5EGJ5	AdiposeVisceral	AdiposeVisceral	0.646009
GTEX-Y3I4-0726-SM-4TT7M	AdiposeVisceral	AdiposeVisceral	0.653465
GTEX-18A66-1926-SM-7LTAG	AdiposeVisceral	AdiposeVisceral	0.657484
GTEX-11XUK-0126-SM-5CVLK	Adrenal_GD	Adrenal_GD	0.153016
GTEX-WFG8-0126-SM-4LVMH	Adrenal_GD	Adrenal_GD	0.173886
GTEX-1BAJH-2626-SM-7EPG6	Adrenal_GD	Adrenal_GD	0.201461
GTEX-132NY-2226-SM-5J2LZ	Adrenal_GD	Adrenal_GD	0.204071
GTEX-REY6-1726-SM-48FDL	Adrenal_GD	Adrenal_GD	0.209086
GTEX-YF7O-0126-SM-5IFIR	Adrenal_GD	Adrenal_GD	0.211799
GTEX-PX3G-1326-SM-48U18	Adrenal_GD	Adrenal_GD	0.219352
GTEX-13CF3-0126-SM-5IFFM	Adrenal_GD	Adrenal_GD	0.225146
GTEX-13FTW-0126-SM-5IJED	Adrenal_GD	Adrenal_GD	0.227903
GTEX-16MT8-1626-SM-7EWDW	Adrenal_GD	Adrenal_GD	0.2397
GTEX-ZA64-0226-SM-5HL9C	Adrenal_GD	Adrenal_GD	0.240068
GTEX-14DAQ-1826-SM-5S2VV	Adrenal_GD	Adrenal_GD	0.240637
GTEX-12WSK-0326-SM-5GCOJ	Adrenal_GD	Adrenal_GD	0.242278
GTEX-ZLV1-0226-SM-4WWC1	Adrenal_GD	Adrenal_GD	0.24458
GTEX-12696-0626-SM-5EGGD	Adrenal_GD	Adrenal_GD	0.24585
GTEX-147F4-2526-SM-5NQBB	Adrenal_GD	Adrenal_GD	0.250539
GTEX-QCQG-0126-SM-48U27	Adrenal_GD	Adrenal_GD	0.252305
GTEX-R55G-0126-SM-48FDS	Adrenal_GD	Adrenal_GD	0.263259
GTEX-11NSD-0226-SM-5A5LR	Adrenal_GD	Adrenal_GD	0.263413
GTEX-1AX9J-0626-SM-72D7L	Adrenal_GD	Adrenal_GD	0.265281
GTEX-11P7K-0126-SM-5986E	Adrenal_GD	Adrenal_GD	0.266177
GTEX-PW2O-0226-SM-48TC7	Adrenal_GD	Adrenal_GD	0.269013
GTEX-ZVT2-0826-SM-5GIEO	Adrenal_GD	Adrenal_GD	0.271296
GTEX-14H4A-0226-SM-5SI6Q	Adrenal_GD	Adrenal_GD	0.271827
GTEX-13FH7-0226-SM-5IFGG	Adrenal_GD	Adrenal_GD	0.272448
GTEX-13O21-0126-SM-5IJE8	Adrenal_GD	Adrenal_GD	0.272913
GTEX-13QBU-0526-SM-5IJFE	Adrenal_GD	Adrenal_GD	0.274711
GTEX-UJMC-0226-SM-4IHLH	Adrenal_GD	Adrenal_GD	0.277586
GTEX-1399U-0226-SM-5P9J2	Adrenal_GD	Adrenal_GD	0.277844
GTEX-13OW7-2726-SM-5L3HN	Adrenal_GD	Adrenal_GD	0.278729
GTEX-14PKV-0726-SM-686ZF	Adrenal_GD	Adrenal_GD	0.280808
GTEX-15ER7-1126-SM-6M47F	Adrenal_GD	Adrenal_GD	0.280827
GTEX-ZVP2-0126-SM-5NQ7D	Adrenal_GD	Adrenal_GD	0.281479
GTEX-12WSJ-0126-SM-5GCOM	Adrenal_GD	Adrenal_GD	0.283491
GTEX-ZT9X-0126-SM-4YCFC	Adrenal_GD	Adrenal_GD	0.285238
GTEX-15EU6-0326-SM-6M48I	Adrenal_GD	Adrenal_GD	0.285542
GTEX-14PJ4-0426-SM-6871F	Adrenal_GD	Adrenal_GD	0.287891
GTEX-QDVN-0426-SM-48TZ6	Adrenal_GD	Adrenal_GD	0.289506
GTEX-1C475-0126-SM-731DC	Adrenal_GD	Adrenal_GD	0.297255
GTEX-QMRM-0126-SM-4R1K9	Adrenal_GD	Adrenal_GD	0.297652
GTEX-ZUA1-1926-SM-5E45E	Adrenal_GD	Adrenal_GD	0.298946
GTEX-ZZPU-1226-SM-5N9CK	Adrenal_GD	Adrenal_GD	0.303222
GTEX-17HHY-2226-SM-7KFS4	Adrenal_GD	Adrenal_GD	0.306233
GTEX-12WSN-0926-SM-5GCN1	Adrenal_GD	Adrenal_GD	0.306256
GTEX-12WSL-0326-SM-5CVMK	Adrenal_GD	Adrenal_GD	0.307042
GTEX-14BMU-0126-SM-5S2Q9	Adrenal_GD	Adrenal_GD	0.31018
GTEX-ZTSS-0326-SM-5987M	Adrenal_GD	Adrenal_GD	0.31629
GTEX-13PVR-0226-SM-5RQJI	Adrenal_GD	Adrenal_GD	0.328433
GTEX-132QS-0126-SM-5IFH9	Adrenal_GD	Adrenal_GD	0.364786
GTEX-17KNJ-0326-SM-7KFS5	Adrenal_GD	Adrenal_GD	0.373335
GTEX-13O3O-1626-SM-5KM1O	Adrenal_GD	Adrenal_GD	0.38292
GTEX-13OW6-1726-SM-5IJGI	Adrenal_GD	Adrenal_GD	0.391711
GTEX-11DXZ-0226-SM-5EGGZ	Adrenal_GD	Adrenal_GD	0.391714
GTEX-R55C-0226-SM-48FEO	Adrenal_GD	Adrenal_GD	0.392846
GTEX-Y3IK-0226-SM-51MRJ	Adrenal_GD	Adrenal_GD	0.403127
GTEX-Y5V6-1926-SM-5IFIL	Adrenal_GD	Adrenal_GD	0.403536
GTEX-1B8L1-1326-SM-7MKG6	Adrenal_GD	Adrenal_GD	0.404204
GTEX-T6MO-0126-SM-4DM6X	Adrenal_GD	Adrenal_GD	0.410476
GTEX-18A7A-1826-SM-7KFTU	Adrenal_GD	Adrenal_GD	0.411325
GTEX-132AR-1726-SM-5EGHQ	Adrenal_GD	Adrenal_GD	0.415979
GTEX-12ZZZ-0926-SM-5N9EQ	Adrenal_GD	Adrenal_GD	0.41601
GTEX-1AX8Z-2426-SM-72D7D	Adrenal_GD	Adrenal_GD	0.420031
GTEX-VUSG-1526-SM-4KKZH	Adrenal_GD	Adrenal_GD	0.421602
GTEX-ZDTT-0126-SM-4WKHA	Adrenal_GD	Adrenal_GD	0.423793
GTEX-Y5LM-0126-SM-4VBRL	Adrenal_GD	Adrenal_GD	0.426187
GTEX-12WSD-2126-SM-5LZWK	Adrenal_GD	Adrenal_GD	0.42632
GTEX-14PN3-1426-SM-686Z8	Adrenal_GD	Adrenal_GD	0.427537
GTEX-11DXX-0126-SM-5EGH7	Adrenal_GD	Adrenal_GD	0.428818
GTEX-11I78-1826-SM-5A5M4	Adrenal_GD	Adrenal_GD	0.430487
GTEX-PLZ6-0226-SM-3P61I	Adrenal_GD	Adrenal_GD	0.431787
GTEX-14753-1726-SM-5NQ9X	Adrenal_GD	Adrenal_GD	0.43237
GTEX-1A3MV-0226-SM-731FS	Adrenal_GD	Adrenal_GD	0.433408
GTEX-ZP4G-0126-SM-4YCE3	Adrenal_GD	Adrenal_GD	0.434243
GTEX-PLZ5-0326-SM-3P614	Adrenal_GD	Adrenal_GD	0.437146
GTEX-11GSP-0326-SM-5A5KW	Adrenal_GD	Adrenal_GD	0.438834
GTEX-18D9B-1926-SM-7KFSV	Adrenal_GD	Adrenal_GD	0.439322
GTEX-18A6Q-1826-SM-72D6I	Adrenal_GD	Adrenal_GD	0.439576
GTEX-ZLFU-0826-SM-4WWBP	Adrenal_GD	Adrenal_GD	0.43998
GTEX-1EKGG-2126-SM-7MKFT	Adrenal_GD	Adrenal_GD	0.440259
GTEX-XMK1-0226-SM-4B65D	Adrenal_GD	Adrenal_GD	0.44389
GTEX-XV7Q-0226-SM-4BRVL	Adrenal_GD	Adrenal_GD	0.444877
GTEX-131YS-2026-SM-5P9J8	Adrenal_GD	Adrenal_GD	0.44526
GTEX-13O61-0126-SM-5KM4P	Adrenal_GD	Adrenal_GD	0.445306
GTEX-131XG-1326-SM-5DUX4	Adrenal_GD	Adrenal_GD	0.446735
GTEX-13OVI-1226-SM-5J2ME	Adrenal_GD	Adrenal_GD	0.446926
GTEX-14C39-2026-SM-664OG	Adrenal_GD	Adrenal_GD	0.44714
GTEX-O5YV-1126-SM-3LK73	Adrenal_GD	Adrenal_GD	0.447314
GTEX-QDVJ-1126-SM-48U1U	Adrenal_GD	Adrenal_GD	0.448266
GTEX-13N11-0826-SM-5IJFP	Adrenal_GD	Adrenal_GD	0.448428
GTEX-14E6E-0126-SM-73KXH	Adrenal_GD	Adrenal_GD	0.449677
GTEX-OHPK-1326-SM-3MJGN	Adrenal_GD	Adrenal_GD	0.450152
GTEX-R53T-0226-SM-48FEH	Adrenal_GD	Adrenal_GD	0.45154
GTEX-13D11-0426-SM-5LZYA	Adrenal_GD	Adrenal_GD	0.454293
GTEX-X4LF-0126-SM-4QAS7	Adrenal_GD	Adrenal_GD	0.454906
GTEX-139YR-0126-SM-5IJEY	Adrenal_GD	Adrenal_GD	0.455576
GTEX-S3XE-0126-SM-4AD4R	Adrenal_GD	Adrenal_GD	0.456205
GTEX-S341-0126-SM-4AD64	Adrenal_GD	Adrenal_GD	0.460994
GTEX-1339X-0826-SM-5J2O6	Adrenal_GD	Adrenal_GD	0.462469
GTEX-Y9LG-0126-SM-5Q59W	Adrenal_GD	Adrenal_GD	0.462575
GTEX-117YX-0126-SM-5EGH5	Adrenal_GD	Adrenal_GD	0.462692
GTEX-QEG5-1826-SM-4R1JP	Adrenal_GD	Adrenal_GD	0.463501
GTEX-Y5V5-1326-SM-4V6G9	Adrenal_GD	Adrenal_GD	0.463691
GTEX-U4B1-0126-SM-4DXSN	Adrenal_GD	Adrenal_GD	0.465365
GTEX-S32W-0126-SM-4AD61	Adrenal_GD	Adrenal_GD	0.46553
GTEX-V1D1-0226-SM-4JBHG	Adrenal_GD	Adrenal_GD	0.466006
GTEX-144GL-1826-SM-79OMB	Adrenal_GD	Adrenal_GD	0.469776
GTEX-1CAMS-0226-SM-79397	Adrenal_GD	Adrenal_GD	0.469819
GTEX-VJYA-0526-SM-4KL1R	Adrenal_GD	Adrenal_GD	0.469881
GTEX-U3ZM-0226-SM-4DXTA	Adrenal_GD	Adrenal_GD	0.471778
GTEX-OHPL-1326-SM-3MJGG	Adrenal_GD	Adrenal_GD	0.47194
GTEX-YB5E-0226-SM-5IFHI	Adrenal_GD	Adrenal_GD	0.47248
GTEX-ZLWG-0126-SM-4WWC5	Adrenal_GD	Adrenal_GD	0.472958
GTEX-14PK6-0126-SM-664O1	Adrenal_GD	Adrenal_GD	0.473426
GTEX-P4QT-1326-SM-3NMD3	Adrenal_GD	Adrenal_GD	0.474233
GTEX-NFK9-1726-SM-3TW8P	Adrenal_GD	Adrenal_GD	0.47551
GTEX-1F5PL-2326-SM-7MKFC	Adrenal_GD	Adrenal_GD	0.475579
GTEX-QLQW-0226-SM-447BJ	Adrenal_GD	Adrenal_GD	0.475752
GTEX-1B8KE-0926-SM-7189I	Adrenal_GD	Adrenal_GD	0.477384
GTEX-111YS-0126-SM-5987T	Adrenal_GD	Adrenal_GD	0.477951
GTEX-11DXY-1626-SM-5H12L	Adrenal_GD	Adrenal_GD	0.478044
GTEX-16NGA-0126-SM-72D6U	Adrenal_GD	Adrenal_GD	0.478181
GTEX-11EQ9-0126-SM-5986I	Adrenal_GD	Adrenal_GD	0.479938
GTEX-111CU-0126-SM-5GZWZ	Adrenal_GD	Adrenal_GD	0.481323
GTEX-ZYFG-0926-SM-5BC5U	Adrenal_GD	Adrenal_GD	0.483604
GTEX-15SHU-1926-SM-7KUMO	Adrenal_GD	Adrenal_GD	0.483687
GTEX-1399S-0426-SM-5IFG5	Adrenal_GD	Adrenal_GD	0.484058
GTEX-145MN-0226-SM-5QGPY	Adrenal_GD	Adrenal_GD	0.484581
GTEX-RM2N-0126-SM-48FDD	Adrenal_GD	Adrenal_GD	0.485267
GTEX-14JG6-0126-SM-68726	Adrenal_GD	Adrenal_GD	0.486206
GTEX-QLQ7-0126-SM-4R1JW	Adrenal_GD	Adrenal_GD	0.487269
GTEX-Q734-0126-SM-48U1E	Adrenal_GD	Adrenal_GD	0.488756
GTEX-P4QS-1326-SM-3NMCD	Adrenal_GD	Adrenal_GD	0.489636
GTEX-145LT-0126-SM-5S2QJ	Adrenal_GD	Adrenal_GD	0.489671
GTEX-14E1K-0626-SM-5S2PG	Adrenal_GD	Adrenal_GD	0.492462
GTEX-Y114-0526-SM-4TT8V	Adrenal_GD	Adrenal_GD	0.494842
GTEX-12BJ1-0526-SM-5FQUD	Adrenal_GD	Adrenal_GD	0.49637
GTEX-146FR-1526-SM-5SIB8	Adrenal_GD	Adrenal_GD	0.496662
GTEX-XUZC-0226-SM-4BOO7	Adrenal_GD	Adrenal_GD	0.496983
GTEX-ZF2S-0126-SM-4WKFO	Adrenal_GD	Adrenal_GD	0.497331
GTEX-16AAH-0226-SM-793A8	Adrenal_GD	Adrenal_GD	0.497656
GTEX-WYVS-0226-SM-4ONDK	Adrenal_GD	Adrenal_GD	0.498477
GTEX-131XF-0126-SM-5DUVF	Adrenal_GD	Adrenal_GD	0.499987
GTEX-14DAR-1726-SM-664MZ	Adrenal_GD	Adrenal_GD	0.500365
GTEX-14A5I-2126-SM-5NQA8	Adrenal_GD	Adrenal_GD	0.501294
GTEX-ZY6K-0126-SM-5SIAM	Adrenal_GD	Adrenal_GD	0.501453
GTEX-1122O-0326-SM-5H124	Adrenal_GD	Adrenal_GD	0.502634
GTEX-WY7C-0326-SM-4OND5	Adrenal_GD	Adrenal_GD	0.502758
GTEX-11EM3-0326-SM-5A5KJ	Adrenal_GD	Adrenal_GD	0.503293
GTEX-ZYVF-1626-SM-5N9EH	Adrenal_GD	Adrenal_GD	0.507449
GTEX-17HGU-0126-SM-7DHLV	Adrenal_GD	Adrenal_GD	0.507473
GTEX-PWCY-0226-SM-48TD8	Adrenal_GD	Adrenal_GD	0.507631
GTEX-TMMY-0126-SM-4DXTP	Adrenal_GD	Adrenal_GD	0.514731
GTEX-U3ZN-0826-SM-4DXSZ	Adrenal_GD	Adrenal_GD	0.516729
GTEX-WHPG-1526-SM-4M1ZK	Adrenal_GD	Adrenal_GD	0.51749
GTEX-S4Z8-0126-SM-4GICC	Adrenal_GD	Adrenal_GD	0.520858
GTEX-WQUQ-0126-SM-4OOSS	Adrenal_GD	Adrenal_GD	0.521377
GTEX-ZT9W-0126-SM-4YCFD	Adrenal_GD	Adrenal_GD	0.522202
GTEX-12WSG-0726-SM-5EGIG	Adrenal_GD	Adrenal_GD	0.522277
GTEX-OIZH-1326-SM-3NB1H	Adrenal_GD	Adrenal_GD	0.524316
GTEX-Q2AH-0126-SM-48U2B	Adrenal_GD	Adrenal_GD	0.524853
GTEX-1211K-0126-SM-59HJE	Adrenal_GD	Adrenal_GD	0.525523
GTEX-S4Q7-0226-SM-4AD5O	Adrenal_GD	Adrenal_GD	0.525905
GTEX-YFCO-0126-SM-4W1YT	Adrenal_GD	Adrenal_GD	0.527228
GTEX-13PL7-1026-SM-5MR5C	Adrenal_GD	Adrenal_GD	0.527369
GTEX-S33H-1326-SM-4AD6A	Adrenal_GD	Adrenal_GD	0.527649
GTEX-1AMFI-0626-SM-731DR	Adrenal_GD	Adrenal_GD	0.52766
GTEX-O5YT-1326-SM-3MJGR	Adrenal_GD	Adrenal_GD	0.529199
GTEX-14C38-1726-SM-5RQJC	Adrenal_GD	Adrenal_GD	0.530246
GTEX-14PJ6-0126-SM-686Z5	Adrenal_GD	Adrenal_GD	0.531592
GTEX-1CAMR-0126-SM-79391	Adrenal_GD	Adrenal_GD	0.533717
GTEX-XQ3S-1726-SM-4BOOD	Adrenal_GD	Adrenal_GD	0.534051
GTEX-15DYW-2126-SM-6M47B	Adrenal_GD	Adrenal_GD	0.535721
GTEX-11EMC-0526-SM-5EGJN	Adrenal_GD	Adrenal_GD	0.537364
GTEX-1B8KZ-0126-SM-7DHM5	Adrenal_GD	Adrenal_GD	0.537599
GTEX-XYKS-0926-SM-4BRVG	Adrenal_GD	Adrenal_GD	0.538721
GTEX-Q2AI-0226-SM-48U1D	Adrenal_GD	Adrenal_GD	0.538947
GTEX-OOBK-3125-SM-3LK5R	Adrenal_GD	Adrenal_GD	0.542164
GTEX-V955-0126-SM-4JBH5	Adrenal_GD	Adrenal_GD	0.542558
GTEX-1399R-0326-SM-5KM1X	Adrenal_GD	Adrenal_GD	0.546582
GTEX-15CHR-0626-SM-7938V	Adrenal_GD	Adrenal_GD	0.547686
GTEX-RUSQ-0226-SM-47JWT	Adrenal_GD	Adrenal_GD	0.553211
GTEX-TKQ2-0226-SM-4DM6V	Adrenal_GD	Adrenal_GD	0.556197
GTEX-14XAO-0326-SM-6ETZN	Adrenal_GD	Adrenal_GD	0.561177
GTEX-13111-0326-SM-5DUXF	Adrenal_GD	Adrenal_GD	0.56492
GTEX-11TT1-0126-SM-5LUAA	Adrenal_GD	Adrenal_GD	0.566964
GTEX-17HHE-0226-SM-79399	Adrenal_GD	Adrenal_GD	0.57583
GTEX-1A3MW-2126-SM-731DO	Adrenal_GD	Adrenal_GD	0.595731
GTEX-OXRK-0126-SM-3NB1E	Adrenal_GD	Adrenal_GD	0.603383
GTEX-13W3W-1326-SM-5LU4T	Adrenal_GD	Adrenal_GD	0.623105
GTEX-W5WG-1126-SM-4LMK4	Adrenal_GD	Adrenal_GD	0.631004
GTEX-11ONC-0926-SM-5BC5E	ArteryAorta	ArteryAorta	0.109572
GTEX-11ZVC-0326-SM-5CVLC	ArteryAorta	ArteryAorta	0.122768
GTEX-14C39-0126-SM-6128R	ArteryAorta	ArteryAorta	0.13428
GTEX-16XZZ-1426-SM-7KUE3	ArteryAorta	ArteryAorta	0.13787
GTEX-QEG4-0926-SM-4R1JO	ArteryAorta	ArteryAorta	0.144093
GTEX-RUSQ-0326-SM-47JWS	ArteryAorta	ArteryAorta	0.149775
GTEX-O5YW-0426-SM-3MJHJ	ArteryAorta	ArteryAorta	0.151052
GTEX-QXCU-0926-SM-48FEP	ArteryAorta	ArteryAorta	0.151253
GTEX-14A5I-1326-SM-5SIAQ	ArteryAorta	ArteryAorta	0.152852
GTEX-YEC4-0726-SM-5CVLV	ArteryAorta	ArteryAorta	0.156545
GTEX-14PJ2-1226-SM-62LFE	ArteryAorta	ArteryAorta	0.15778
GTEX-13OW6-1526-SM-5L3HX	ArteryAorta	ArteryAorta	0.159563
GTEX-17KNJ-0526-SM-7LTA8	ArteryAorta	ArteryAorta	0.163747
GTEX-ZYVF-2126-SM-5E44N	ArteryAorta	ArteryAorta	0.167109
GTEX-17HII-1826-SM-7DUFQ	ArteryAorta	ArteryAorta	0.172918
GTEX-QLQ7-0426-SM-4R1JU	ArteryAorta	ArteryAorta	0.17341
GTEX-11WQK-0326-SM-5EQL1	ArteryAorta	ArteryAorta	0.175324
GTEX-17EVQ-1626-SM-79ONH	ArteryAorta	ArteryAorta	0.176359
GTEX-ZYY3-1226-SM-5EQKM	ArteryAorta	ArteryAorta	0.185357
GTEX-ZC5H-1026-SM-5CVN1	ArteryAorta	ArteryAorta	0.189875
GTEX-146FR-1026-SM-5NQ9T	ArteryAorta	ArteryAorta	0.191019
GTEX-ZE9C-0726-SM-4WKGA	ArteryAorta	ArteryAorta	0.196393
GTEX-11DYG-1226-SM-5N9DC	ArteryAorta	ArteryAorta	0.197431
GTEX-14ASI-1126-SM-5QGPN	ArteryAorta	ArteryAorta	0.197456
GTEX-14C5O-1526-SM-7DHKT	ArteryAorta	ArteryAorta	0.200438
GTEX-YJ8O-0226-SM-5S2NL	ArteryAorta	ArteryAorta	0.201919
GTEX-ZYW4-1226-SM-5E45B	ArteryAorta	ArteryAorta	0.205868
GTEX-ZDTS-1426-SM-5K7WC	ArteryAorta	ArteryAorta	0.206184
GTEX-S33H-0726-SM-4AD6M	ArteryAorta	ArteryAorta	0.212629
GTEX-117YW-0226-SM-5N9CM	ArteryAorta	ArteryAorta	0.215025
GTEX-ZAK1-1226-SM-5Q5AA	ArteryAorta	ArteryAorta	0.217413
GTEX-15CHC-0626-SM-686YV	ArteryAorta	ArteryAorta	0.218774
GTEX-139UW-0426-SM-5K7V4	ArteryAorta	ArteryAorta	0.221587
GTEX-1C6VQ-1326-SM-7939X	ArteryAorta	ArteryAorta	0.22704
GTEX-11ZTS-0826-SM-5EQ49	ArteryAorta	ArteryAorta	0.22851
GTEX-147F4-1026-SM-5Q5F9	ArteryAorta	ArteryAorta	0.228607
GTEX-REY6-1126-SM-48FDU	ArteryAorta	ArteryAorta	0.23099
GTEX-Y8LW-0426-SM-4VBQ6	ArteryAorta	ArteryAorta	0.231983
GTEX-13W46-1826-SM-5K7VA	ArteryAorta	ArteryAorta	0.233299
GTEX-13O3O-1126-SM-5KM4Q	ArteryAorta	ArteryAorta	0.23743
GTEX-14PK6-0626-SM-6AJ9P	ArteryAorta	ArteryAorta	0.238747
GTEX-ZPIC-1026-SM-59HKZ	ArteryAorta	ArteryAorta	0.238889
GTEX-13W3W-0226-SM-731ET	ArteryAorta	ArteryAorta	0.244906
GTEX-14BMV-1226-SM-5TDDY	ArteryAorta	ArteryAorta	0.247849
GTEX-12KS4-0626-SM-5PNY4	ArteryAorta	ArteryAorta	0.2497
GTEX-18A7A-1426-SM-731AP	ArteryAorta	ArteryAorta	0.253463
GTEX-14E6C-0626-SM-664NA	ArteryAorta	ArteryAorta	0.257514
GTEX-UPJH-0926-SM-4IHKA	ArteryAorta	ArteryAorta	0.263462
GTEX-117XS-0426-SM-5GZZN	ArteryAorta	ArteryAorta	0.264789
GTEX-14PJM-1426-SM-62LF3	ArteryAorta	ArteryAorta	0.26691
GTEX-1128S-0326-SM-5GZZF	ArteryAorta	ArteryAorta	0.269693
GTEX-13FTZ-0126-SM-5K7V3	ArteryAorta	ArteryAorta	0.272577
GTEX-15F5U-0226-SM-6PANK	ArteryAorta	ArteryAorta	0.277301
GTEX-OXRL-0426-SM-3NM97	ArteryAorta	ArteryAorta	0.282085
GTEX-13X6K-1926-SM-5LU4O	ArteryAorta	ArteryAorta	0.291863
GTEX-NPJ8-0526-SM-3MJHN	ArteryAorta	ArteryAorta	0.29217
GTEX-Y9LG-0226-SM-4VBS4	ArteryAorta	ArteryAorta	0.295201
GTEX-1212Z-0826-SM-5EQ51	ArteryAorta	ArteryAorta	0.302616
GTEX-ZF28-1026-SM-4WKGV	ArteryAorta	ArteryAorta	0.308929
GTEX-15SHU-1226-SM-718BY	ArteryAorta	ArteryAorta	0.311375
GTEX-13RTK-0126-SM-5RQHQ	ArteryAorta	ArteryAorta	0.313929
GTEX-Q2AH-0326-SM-48U1K	ArteryAorta	ArteryAorta	0.315949
GTEX-OHPM-0426-SM-3TW8V	ArteryAorta	ArteryAorta	0.328521
GTEX-XXEK-0726-SM-4BRWF	ArteryAorta	ArteryAorta	0.338849
GTEX-YFC4-0326-SM-4TT3U	ArteryAorta	ArteryAorta	0.343497
GTEX-ZVZP-0126-SM-5NQ6Q	ArteryAorta	ArteryAorta	0.344129
GTEX-13YAN-1526-SM-5LU3E	ArteryAorta	ArteryAorta	0.346311
GTEX-1B933-1126-SM-73KX2	ArteryAorta	ArteryAorta	0.350466
GTEX-ZA64-0126-SM-5HL8Z	ArteryAorta	ArteryAorta	0.352341
GTEX-Q2AG-0926-SM-48U1Q	ArteryAorta	ArteryAorta	0.353984
GTEX-13113-0526-SM-5GCN2	ArteryAorta	ArteryAorta	0.355849
GTEX-18A6Q-1426-SM-7LG63	ArteryAorta	ArteryAorta	0.356795
GTEX-1497J-1026-SM-5NQAV	ArteryAorta	ArteryAorta	0.357511
GTEX-15ER7-2026-SM-793B8	ArteryAorta	ArteryAorta	0.358239
GTEX-15RJE-2426-SM-6PAM9	ArteryAorta	ArteryAorta	0.358763
GTEX-ZDXO-2726-SM-4WKFA	ArteryAorta	ArteryAorta	0.360382
GTEX-145MH-1026-SM-5Q5CI	ArteryAorta	ArteryAorta	0.363073
GTEX-18D9U-1326-SM-731BI	ArteryAorta	ArteryAorta	0.363771
GTEX-Y3IK-0726-SM-4WWE5	ArteryAorta	ArteryAorta	0.363917
GTEX-1313W-1026-SM-5EQ5I	ArteryAorta	ArteryAorta	0.364162
GTEX-139D8-1226-SM-5L3ED	ArteryAorta	ArteryAorta	0.366667
GTEX-ZYFD-2126-SM-5E43D	ArteryAorta	ArteryAorta	0.368133
GTEX-12ZZY-1326-SM-5GCNW	ArteryAorta	ArteryAorta	0.369263
GTEX-X4EO-1026-SM-4QARP	ArteryAorta	ArteryAorta	0.370653
GTEX-WYVS-0426-SM-4ONDL	ArteryAorta	ArteryAorta	0.371703
GTEX-T6MN-1126-SM-4DM71	ArteryAorta	ArteryAorta	0.371847
GTEX-15FZZ-0426-SM-6PANM	ArteryAorta	ArteryAorta	0.371893
GTEX-14AS3-0526-SM-5QGQQ	ArteryAorta	ArteryAorta	0.372844
GTEX-1EU9M-1726-SM-7EWF3	ArteryAorta	ArteryAorta	0.374655
GTEX-14BIM-2626-SM-5S2OF	ArteryAorta	ArteryAorta	0.374943
GTEX-PW2O-0426-SM-48TCC	ArteryAorta	ArteryAorta	0.375592
GTEX-17MF6-1026-SM-7EWE1	ArteryAorta	ArteryAorta	0.376402
GTEX-P4PP-0426-SM-3NM9H	ArteryAorta	ArteryAorta	0.378585
GTEX-Y114-0426-SM-4TT6V	ArteryAorta	ArteryAorta	0.378707
GTEX-X4XY-1526-SM-4QASE	ArteryAorta	ArteryAorta	0.37902
GTEX-13FLV-1426-SM-5J1N4	ArteryAorta	ArteryAorta	0.379507
GTEX-QDVN-0226-SM-48TZ9	ArteryAorta	ArteryAorta	0.379885
GTEX-11GSP-1126-SM-5A5LM	ArteryAorta	ArteryAorta	0.380814
GTEX-1B8KE-0226-SM-7EWEK	ArteryAorta	ArteryAorta	0.380933
GTEX-1399T-0526-SM-5J1NC	ArteryAorta	ArteryAorta	0.381442
GTEX-1211K-0326-SM-5FQT1	ArteryAorta	ArteryAorta	0.383033
GTEX-13NYB-0426-SM-5IJDD	ArteryAorta	ArteryAorta	0.383758
GTEX-V1D1-0326-SM-4JBIY	ArteryAorta	ArteryAorta	0.384712
GTEX-OHPK-0426-SM-3MJH3	ArteryAorta	ArteryAorta	0.389588
GTEX-11NUK-0726-SM-5A5ME	ArteryAorta	ArteryAorta	0.391062
GTEX-12696-0426-SM-5EGL5	ArteryAorta	ArteryAorta	0.393492
GTEX-13NZ9-1226-SM-5MR3J	ArteryAorta	ArteryAorta	0.393908
GTEX-SJXC-1126-SM-4DM6Y	ArteryAorta	ArteryAorta	0.394081
GTEX-1C2JI-0426-SM-79OOF	ArteryAorta	ArteryAorta	0.394399
GTEX-13PVQ-1426-SM-5J1O4	ArteryAorta	ArteryAorta	0.394657
GTEX-PSDG-1026-SM-48TCV	ArteryAorta	ArteryAorta	0.394741
GTEX-145MO-1226-SM-5QGPC	ArteryAorta	ArteryAorta	0.3969
GTEX-11EMC-0926-SM-59863	ArteryAorta	ArteryAorta	0.397267
GTEX-QDT8-1026-SM-43V6X	ArteryAorta	ArteryAorta	0.397691
GTEX-P44H-1026-SM-3NM96	ArteryAorta	ArteryAorta	0.39794
GTEX-WRHU-1326-SM-4E3K7	ArteryAorta	ArteryAorta	0.398753
GTEX-11GS4-0326-SM-5N9F7	ArteryAorta	ArteryAorta	0.399639
GTEX-1EN7A-1126-SM-7IGQ1	ArteryAorta	ArteryAorta	0.401953
GTEX-Y5V6-0426-SM-4VBRZ	ArteryAorta	ArteryAorta	0.402889
GTEX-13O3P-1126-SM-5L3FG	ArteryAorta	ArteryAorta	0.403614
GTEX-OIZI-1126-SM-3NB1F	ArteryAorta	ArteryAorta	0.403909
GTEX-OHPL-0426-SM-3TW8X	ArteryAorta	ArteryAorta	0.404219
GTEX-UJMC-0626-SM-4IHJQ	ArteryAorta	ArteryAorta	0.405518
GTEX-VUSG-0526-SM-4KL22	ArteryAorta	ArteryAorta	0.405707
GTEX-132AR-2126-SM-5K7XG	ArteryAorta	ArteryAorta	0.405973
GTEX-N7MT-1426-SM-3LK5M	ArteryAorta	ArteryAorta	0.40676
GTEX-OOBJ-0426-SM-3NB1S	ArteryAorta	ArteryAorta	0.407398
GTEX-13FH7-0326-SM-5J1MR	ArteryAorta	ArteryAorta	0.408928
GTEX-14E7W-1426-SM-6LLJ2	ArteryAorta	ArteryAorta	0.410183
GTEX-1AYCT-0326-SM-73KVN	ArteryAorta	ArteryAorta	0.410248
GTEX-S32W-0426-SM-4AD6H	ArteryAorta	ArteryAorta	0.410478
GTEX-WQUQ-1526-SM-4OOSM	ArteryAorta	ArteryAorta	0.411384
GTEX-15UF6-0226-SM-7KUF6	ArteryAorta	ArteryAorta	0.411445
GTEX-QMRM-0626-SM-447BQ	ArteryAorta	ArteryAorta	0.41242
GTEX-ZDTT-0226-SM-4WKHM	ArteryAorta	ArteryAorta	0.412697
GTEX-139TU-1126-SM-5J1NY	ArteryAorta	ArteryAorta	0.414211
GTEX-R53T-0826-SM-48FCP	ArteryAorta	ArteryAorta	0.414456
GTEX-QEG5-1226-SM-447AR	ArteryAorta	ArteryAorta	0.415484
GTEX-15G19-1026-SM-6PALM	ArteryAorta	ArteryAorta	0.415658
GTEX-17EVP-0926-SM-7IGOY	ArteryAorta	ArteryAorta	0.416341
GTEX-ZG7Y-0126-SM-4WWEX	ArteryAorta	ArteryAorta	0.416394
GTEX-POMQ-0426-SM-3P61G	ArteryAorta	ArteryAorta	0.4179
GTEX-P4QS-0426-SM-3NMCQ	ArteryAorta	ArteryAorta	0.421531
GTEX-ZP4G-0526-SM-4YCED	ArteryAorta	ArteryAorta	0.422779
GTEX-11DXX-0426-SM-5EQ5F	ArteryAorta	ArteryAorta	0.422894
GTEX-13PVR-0826-SM-5S2PV	ArteryAorta	ArteryAorta	0.423338
GTEX-XQ8I-1326-SM-4BOPV	ArteryAorta	ArteryAorta	0.423877
GTEX-13O1R-1026-SM-5KM2L	ArteryAorta	ArteryAorta	0.424139
GTEX-11P81-0326-SM-5HL6B	ArteryAorta	ArteryAorta	0.424164
GTEX-NFK9-1326-SM-3LK5I	ArteryAorta	ArteryAorta	0.424509
GTEX-PX3G-0426-SM-48U1C	ArteryAorta	ArteryAorta	0.424622
GTEX-R55G-0626-SM-48FDB	ArteryAorta	ArteryAorta	0.4249
GTEX-YEC3-0526-SM-5IFHN	ArteryAorta	ArteryAorta	0.427542
GTEX-15DYW-1226-SM-6PALV	ArteryAorta	ArteryAorta	0.431027
GTEX-ZYFG-0326-SM-5E45Z	ArteryAorta	ArteryAorta	0.431096
GTEX-V955-0926-SM-4JBJ8	ArteryAorta	ArteryAorta	0.432337
GTEX-14PJ4-0826-SM-6LLH5	ArteryAorta	ArteryAorta	0.432338
GTEX-XBED-0726-SM-4GIAR	ArteryAorta	ArteryAorta	0.432393
GTEX-14ICL-0326-SM-5S2OS	ArteryAorta	ArteryAorta	0.432557
GTEX-13OW5-0826-SM-5J1NE	ArteryAorta	ArteryAorta	0.433403
GTEX-1EKGG-0826-SM-79OLL	ArteryAorta	ArteryAorta	0.433546
GTEX-1EMGI-0926-SM-7IGPV	ArteryAorta	ArteryAorta	0.435771
GTEX-XPT6-0326-SM-4B66V	ArteryAorta	ArteryAorta	0.436276
GTEX-11UD2-0826-SM-5EQKS	ArteryAorta	ArteryAorta	0.438524
GTEX-1CB4I-1826-SM-793CX	ArteryAorta	ArteryAorta	0.438591
GTEX-UPK5-1526-SM-4JBJA	ArteryAorta	ArteryAorta	0.439686
GTEX-Y8E4-1126-SM-5IFIA	ArteryAorta	ArteryAorta	0.439797
GTEX-131XF-0626-SM-5GIDS	ArteryAorta	ArteryAorta	0.440447
GTEX-12WSK-0426-SM-5GCNS	ArteryAorta	ArteryAorta	0.440923
GTEX-17GQL-2326-SM-731EJ	ArteryAorta	ArteryAorta	0.441336
GTEX-15DZA-1226-SM-7KFS1	ArteryAorta	ArteryAorta	0.44156
GTEX-QV31-0326-SM-447BM	ArteryAorta	ArteryAorta	0.441967
GTEX-VJYA-0226-SM-4KL1Q	ArteryAorta	ArteryAorta	0.442545
GTEX-15SHV-0826-SM-7KUFA	ArteryAorta	ArteryAorta	0.442555
GTEX-POYW-1126-SM-48TCI	ArteryAorta	ArteryAorta	0.44275
GTEX-13X6I-0926-SM-5LUAB	ArteryAorta	ArteryAorta	0.444351
GTEX-139TS-0226-SM-5K7W5	ArteryAorta	ArteryAorta	0.444453
GTEX-Z9EW-0126-SM-5CVM6	ArteryAorta	ArteryAorta	0.44497
GTEX-13FTX-0226-SM-5K7TX	ArteryAorta	ArteryAorta	0.445764
GTEX-QV44-0626-SM-4R1KJ	ArteryAorta	ArteryAorta	0.446938
GTEX-14E1K-0726-SM-62LDU	ArteryAorta	ArteryAorta	0.448514
GTEX-Y5V5-0426-SM-4VBPU	ArteryAorta	ArteryAorta	0.448685
GTEX-QDVJ-0626-SM-48U1T	ArteryAorta	ArteryAorta	0.448855
GTEX-XBEW-0526-SM-4QASO	ArteryAorta	ArteryAorta	0.450289
GTEX-QCQG-1526-SM-48U25	ArteryAorta	ArteryAorta	0.452437
GTEX-18A66-1326-SM-7LG4M	ArteryAorta	ArteryAorta	0.452754
GTEX-YECK-1326-SM-4W1ZF	ArteryAorta	ArteryAorta	0.453035
GTEX-U3ZH-0626-SM-4DXT3	ArteryAorta	ArteryAorta	0.453464
GTEX-12ZZX-1026-SM-5LZUW	ArteryAorta	ArteryAorta	0.45363
GTEX-14PJ3-0226-SM-6EU37	ArteryAorta	ArteryAorta	0.456522
GTEX-1A3MV-0426-SM-73KXL	ArteryAorta	ArteryAorta	0.456874
GTEX-X4EP-1426-SM-4PQZP	ArteryAorta	ArteryAorta	0.457156
GTEX-ZAB4-0526-SM-5HL7Z	ArteryAorta	ArteryAorta	0.457598
GTEX-12WSN-0326-SM-5GCP6	ArteryAorta	ArteryAorta	0.45766
GTEX-XQ3S-0126-SM-4BOO9	ArteryAorta	ArteryAorta	0.45797
GTEX-13D11-1426-SM-5K7Y9	ArteryAorta	ArteryAorta	0.459384
GTEX-ZYT6-1026-SM-7LG6X	ArteryAorta	ArteryAorta	0.459477
GTEX-XV7Q-0526-SM-4BRWR	ArteryAorta	ArteryAorta	0.459615
GTEX-14PJ6-0526-SM-6LLIU	ArteryAorta	ArteryAorta	0.461561
GTEX-11LCK-0726-SM-5PNYC	ArteryAorta	ArteryAorta	0.462188
GTEX-1AMFI-0426-SM-731C7	ArteryAorta	ArteryAorta	0.462964
GTEX-WFG8-0826-SM-4LVN5	ArteryAorta	ArteryAorta	0.466487
GTEX-WZTO-1626-SM-4PQYR	ArteryAorta	ArteryAorta	0.467298
GTEX-13OVG-0826-SM-5L3D8	ArteryAorta	ArteryAorta	0.469913
GTEX-S95S-0226-SM-4B656	ArteryAorta	ArteryAorta	0.471442
GTEX-Y5LM-0226-SM-4VBRM	ArteryAorta	ArteryAorta	0.471659
GTEX-1C4CL-1226-SM-7DUFT	ArteryAorta	ArteryAorta	0.472904
GTEX-ZAJG-1226-SM-5S2MH	ArteryAorta	ArteryAorta	0.473458
GTEX-UJHI-0226-SM-4IHJL	ArteryAorta	ArteryAorta	0.473666
GTEX-WHSB-0226-SM-4M1XE	ArteryAorta	ArteryAorta	0.47399
GTEX-XUZC-0626-SM-4BOPG	ArteryAorta	ArteryAorta	0.474075
GTEX-ZF3C-1426-SM-4WWCD	ArteryAorta	ArteryAorta	0.474254
GTEX-R55E-1126-SM-48FDZ	ArteryAorta	ArteryAorta	0.474265
GTEX-14B4R-0226-SM-5TDDO	ArteryAorta	ArteryAorta	0.474266
GTEX-XUW1-1126-SM-4BONZ	ArteryAorta	ArteryAorta	0.475138
GTEX-18A67-0926-SM-7LG5Y	ArteryAorta	ArteryAorta	0.475385
GTEX-P4PQ-0426-SM-3NMCI	ArteryAorta	ArteryAorta	0.476897
GTEX-111YS-0526-SM-5GZXJ	ArteryAorta	ArteryAorta	0.47776
GTEX-QEL4-1126-SM-4R1JJ	ArteryAorta	ArteryAorta	0.478231
GTEX-U3ZM-0326-SM-4DXUJ	ArteryAorta	ArteryAorta	0.478741
GTEX-139YR-0626-SM-5IJBT	ArteryAorta	ArteryAorta	0.479394
GTEX-Y3I4-0326-SM-4TT28	ArteryAorta	ArteryAorta	0.480296
GTEX-WY7C-0626-SM-4ONCT	ArteryAorta	ArteryAorta	0.483883
GTEX-XYKS-0426-SM-4BRW4	ArteryAorta	ArteryAorta	0.484065
GTEX-13U4I-1026-SM-5LU3G	ArteryAorta	ArteryAorta	0.485347
GTEX-13QBU-0326-SM-5LU3F	ArteryAorta	ArteryAorta	0.485844
GTEX-ZQUD-0226-SM-4YCEB	ArteryAorta	ArteryAorta	0.486069
GTEX-WFG7-0926-SM-4LMK7	ArteryAorta	ArteryAorta	0.486195
GTEX-13FHO-1626-SM-5IJGB	ArteryAorta	ArteryAorta	0.487136
GTEX-1399U-0426-SM-5K7UU	ArteryAorta	ArteryAorta	0.48722
GTEX-U3ZN-0526-SM-4DXTH	ArteryAorta	ArteryAorta	0.487276
GTEX-17F98-0726-SM-793BJ	ArteryAorta	ArteryAorta	0.489667
GTEX-S3XE-0326-SM-4AD6L	ArteryAorta	ArteryAorta	0.490198
GTEX-ZF29-0326-SM-4WKFB	ArteryAorta	ArteryAorta	0.491495
GTEX-S4Z8-0626-SM-4AD6J	ArteryAorta	ArteryAorta	0.495966
GTEX-13CF3-0526-SM-5IJBV	ArteryAorta	ArteryAorta	0.496908
GTEX-12C56-0226-SM-5N9FB	ArteryAorta	ArteryAorta	0.496975
GTEX-13OW8-1826-SM-5L3H1	ArteryAorta	ArteryAorta	0.497356
GTEX-1339X-0526-SM-5KLYW	ArteryAorta	ArteryAorta	0.498768
GTEX-12WSD-1326-SM-5GCNU	ArteryAorta	ArteryAorta	0.49912
GTEX-11DXZ-0426-SM-5987Y	ArteryAorta	ArteryAorta	0.499755
GTEX-11EM3-0226-SM-5985Y	ArteryAorta	ArteryAorta	0.500216
GTEX-WHWD-0526-SM-4OORW	ArteryAorta	ArteryAorta	0.500825
GTEX-13N2G-0526-SM-5MR5L	ArteryAorta	ArteryAorta	0.504364
GTEX-U8XE-1226-SM-4E3HN	ArteryAorta	ArteryAorta	0.504496
GTEX-QVUS-0426-SM-48FE3	ArteryAorta	ArteryAorta	0.504955
GTEX-13O61-0326-SM-5KM2O	ArteryAorta	ArteryAorta	0.505391
GTEX-146FQ-0826-SM-5LUAJ	ArteryAorta	ArteryAorta	0.507312
GTEX-ZDYS-0526-SM-5L3EE	ArteryAorta	ArteryAorta	0.508845
GTEX-P78B-0826-SM-3NMCA	ArteryAorta	ArteryAorta	0.509963
GTEX-15RIF-0126-SM-7KUG3	ArteryAorta	ArteryAorta	0.510307
GTEX-QVJO-0526-SM-447CE	ArteryAorta	ArteryAorta	0.510529
GTEX-11TUW-0926-SM-5EQMW	ArteryAorta	ArteryAorta	0.510585
GTEX-R55D-1026-SM-3GAEQ	ArteryAorta	ArteryAorta	0.511902
GTEX-14DAQ-1326-SM-5RQIM	ArteryAorta	ArteryAorta	0.512507
GTEX-144GN-0326-SM-5O9AD	ArteryAorta	ArteryAorta	0.514903
GTEX-17F96-1126-SM-7EWDF	ArteryAorta	ArteryAorta	0.515418
GTEX-11P82-0126-SM-5HL72	ArteryAorta	ArteryAorta	0.515573
GTEX-T5JC-0326-SM-4DM5C	ArteryAorta	ArteryAorta	0.516077
GTEX-ZVT2-0726-SM-5GIER	ArteryAorta	ArteryAorta	0.516498
GTEX-11I78-0726-SM-5A5M1	ArteryAorta	ArteryAorta	0.519493
GTEX-RWSA-0926-SM-47JXW	ArteryAorta	ArteryAorta	0.520094
GTEX-1399R-0626-SM-5K7UZ	ArteryAorta	ArteryAorta	0.521595
GTEX-1AX9I-1226-SM-731CJ	ArteryAorta	ArteryAorta	0.521768
GTEX-YB5K-0326-SM-5IFJQ	ArteryAorta	ArteryAorta	0.52232
GTEX-OOBK-0425-SM-3LK5O	ArteryAorta	ArteryAorta	0.522342
GTEX-13VXT-0826-SM-5SIAP	ArteryAorta	ArteryAorta	0.523725
GTEX-1AMEY-0726-SM-72D5X	ArteryAorta	ArteryAorta	0.529407
GTEX-PLZ5-0426-SM-3P612	ArteryAorta	ArteryAorta	0.533584
GTEX-11TT1-1226-SM-5Q5AV	ArteryAorta	ArteryAorta	0.533751
GTEX-OIZG-0426-SM-3LK5W	ArteryAorta	ArteryAorta	0.533957
GTEX-ZF2S-0926-SM-4WWBJ	ArteryAorta	ArteryAorta	0.534905
GTEX-1B8SG-0626-SM-79OL3	ArteryAorta	ArteryAorta	0.534911
GTEX-13O21-0426-SM-5K7VR	ArteryAorta	ArteryAorta	0.53887
GTEX-WH7G-0626-SM-4LVMO	ArteryAorta	ArteryAorta	0.539235
GTEX-1122O-1126-SM-5NQ8X	ArteryAorta	ArteryAorta	0.53961
GTEX-O5YT-0426-SM-3MJHD	ArteryAorta	ArteryAorta	0.540208
GTEX-PLZ6-0326-SM-3P61J	ArteryAorta	ArteryAorta	0.541671
GTEX-O5YV-0626-SM-3LK64	ArteryAorta	ArteryAorta	0.54274
GTEX-131XW-2226-SM-5PNY1	ArteryAorta	ArteryAorta	0.548498
GTEX-1AX8Z-1226-SM-7DHM7	ArteryAorta	ArteryAorta	0.54921
GTEX-PWCY-0326-SM-43IRU	ArteryAorta	ArteryAorta	0.550349
GTEX-QESD-0426-SM-4R1JZ	ArteryAorta	ArteryAorta	0.552848
GTEX-S4P3-0326-SM-4AD6P	ArteryAorta	ArteryAorta	0.55309
GTEX-WYJK-1226-SM-4ONCP	ArteryAorta	ArteryAorta	0.553782
GTEX-SNOS-0326-SM-4DM6C	ArteryAorta	ArteryAorta	0.554352
GTEX-146FH-1326-SM-5NQBI	ArteryAorta	ArteryAorta	0.554889
GTEX-132QS-0626-SM-62LFM	ArteryAorta	ArteryAorta	0.556194
GTEX-14BMU-0326-SM-793DO	ArteryAorta	ArteryAorta	0.559043
GTEX-WFON-0526-SM-4LVLY	ArteryAorta	ArteryAorta	0.562343
GTEX-RWS6-0526-SM-4GIAJ	ArteryAorta	ArteryAorta	0.56621
GTEX-131YS-1126-SM-5N9FQ	ArteryAorta	ArteryAorta	0.567352
GTEX-13111-0526-SM-5LZVF	ArteryAorta	ArteryAorta	0.570108
GTEX-X3Y1-0326-SM-4PQZ7	ArteryAorta	ArteryAorta	0.570833
GTEX-133LE-0226-SM-5PNY3	ArteryAorta	ArteryAorta	0.572128
GTEX-TMMY-1026-SM-4DXTI	ArteryAorta	ArteryAorta	0.589812
GTEX-T8EM-0426-SM-4DM7E	ArteryAorta	ArteryAorta	0.589897
GTEX-15DDE-1326-SM-6LLJM	ArteryAorta	ArteryAorta	0.591523
GTEX-15ETS-0726-SM-6LPKL	ArteryAorta	ArteryAorta	0.594702
GTEX-14C5O-1426-SM-5RQI8	ArteryCoronary	ArteryCoronary	0.116727
GTEX-16YQH-0826-SM-7938J	ArteryCoronary	ArteryCoronary	0.146892
GTEX-UPK5-0126-SM-3GADM	ArteryCoronary	ArteryCoronary	0.152618
GTEX-13FTW-0926-SM-5J2NJ	ArteryCoronary	ArteryCoronary	0.17793
GTEX-1399S-0926-SM-5PNVQ	ArteryCoronary	ArteryCoronary	0.181544
GTEX-17F9E-1226-SM-7EWDG	ArteryCoronary	ArteryCoronary	0.193877
GTEX-1445S-1126-SM-5QGOW	ArteryCoronary	ArteryCoronary	0.196887
GTEX-U8XE-1026-SM-4E3HM	ArteryCoronary	ArteryCoronary	0.202253
GTEX-13S86-0526-SM-5QGPZ	ArteryCoronary	ArteryCoronary	0.214699
GTEX-QV44-0726-SM-4R1KP	ArteryCoronary	ArteryCoronary	0.214912
GTEX-15ER7-1426-SM-6PAMA	ArteryCoronary	ArteryCoronary	0.215731
GTEX-12WSD-1026-SM-5EQ42	ArteryCoronary	ArteryCoronary	0.218805
GTEX-11DXZ-0526-SM-5GU7J	ArteryCoronary	ArteryCoronary	0.221846
GTEX-U3ZH-0426-SM-4DXSE	ArteryCoronary	ArteryCoronary	0.223586
GTEX-11ZUS-0526-SM-59884	ArteryCoronary	ArteryCoronary	0.227443
GTEX-11GS4-0626-SM-5A5LC	ArteryCoronary	ArteryCoronary	0.230331
GTEX-QLQ7-0326-SM-4R1JV	ArteryCoronary	ArteryCoronary	0.233139
GTEX-14BMV-0926-SM-7DHKM	ArteryCoronary	ArteryCoronary	0.234631
GTEX-11ZTS-1026-SM-5LU8O	ArteryCoronary	ArteryCoronary	0.236919
GTEX-1A32A-1726-SM-731BW	ArteryCoronary	ArteryCoronary	0.23788
GTEX-11DYG-0926-SM-5EGGW	ArteryCoronary	ArteryCoronary	0.244002
GTEX-O5YW-3026-SM-3MJHI	ArteryCoronary	ArteryCoronary	0.244541
GTEX-11EM3-0526-SM-5H12N	ArteryCoronary	ArteryCoronary	0.246502
GTEX-11DXX-0826-SM-5GZZP	ArteryCoronary	ArteryCoronary	0.248677
GTEX-RU72-0226-SM-46MUD	ArteryCoronary	ArteryCoronary	0.248727
GTEX-13NZA-1126-SM-5MR4K	ArteryCoronary	ArteryCoronary	0.249234
GTEX-14PJM-1026-SM-6ETZT	ArteryCoronary	ArteryCoronary	0.253004
GTEX-XV7Q-0626-SM-4BRV5	ArteryCoronary	ArteryCoronary	0.255119
GTEX-14PJ4-1026-SM-6AJ97	ArteryCoronary	ArteryCoronary	0.257868
GTEX-ZUA1-0426-SM-5NQAF	ArteryCoronary	ArteryCoronary	0.267262
GTEX-13QBU-0126-SM-5LU3V	ArteryCoronary	ArteryCoronary	0.268623
GTEX-13PL7-1826-SM-5IJDV	ArteryCoronary	ArteryCoronary	0.275255
GTEX-ZAB4-0726-SM-5HL8I	ArteryCoronary	ArteryCoronary	0.300069
GTEX-S3XE-0226-SM-4AD6I	ArteryCoronary	ArteryCoronary	0.308244
GTEX-13VXU-1926-SM-5LU5J	ArteryCoronary	ArteryCoronary	0.327078
GTEX-11ONC-1126-SM-5GU6G	ArteryCoronary	ArteryCoronary	0.359621
GTEX-15SHU-1026-SM-6PAL7	ArteryCoronary	ArteryCoronary	0.365089
GTEX-ZYFG-0126-SM-5GIDH	ArteryCoronary	ArteryCoronary	0.365945
GTEX-PSDG-0826-SM-48TCZ	ArteryCoronary	ArteryCoronary	0.366068
GTEX-YJ8O-0126-SM-5QGRG	ArteryCoronary	ArteryCoronary	0.369599
GTEX-18A7B-0926-SM-7189F	ArteryCoronary	ArteryCoronary	0.373247
GTEX-17HII-1126-SM-7IGOP	ArteryCoronary	ArteryCoronary	0.374281
GTEX-RN64-0726-SM-48FCV	ArteryCoronary	ArteryCoronary	0.37693
GTEX-RUSQ-0426-SM-47JWR	ArteryCoronary	ArteryCoronary	0.378877
GTEX-ZLFU-0126-SM-5EQMN	ArteryCoronary	ArteryCoronary	0.381799
GTEX-1399R-1826-SM-5J2M9	ArteryCoronary	ArteryCoronary	0.383248
GTEX-15CHQ-1626-SM-6LLJR	ArteryCoronary	ArteryCoronary	0.384573
GTEX-Y3IK-0926-SM-51MQU	ArteryCoronary	ArteryCoronary	0.385814
GTEX-12696-0526-SM-5EQ3Z	ArteryCoronary	ArteryCoronary	0.405235
GTEX-ZYFC-1226-SM-5GIE4	ArteryCoronary	ArteryCoronary	0.408774
GTEX-13FXS-1126-SM-5IJBB	ArteryCoronary	ArteryCoronary	0.408962
GTEX-1C64O-1126-SM-7IGMY	ArteryCoronary	ArteryCoronary	0.41053
GTEX-13QJC-0626-SM-5S2O9	ArteryCoronary	ArteryCoronary	0.411144
GTEX-12ZZX-0626-SM-5EQ46	ArteryCoronary	ArteryCoronary	0.411672
GTEX-15CHR-0526-SM-79OLJ	ArteryCoronary	ArteryCoronary	0.4118
GTEX-18A66-1026-SM-731B8	ArteryCoronary	ArteryCoronary	0.412498
GTEX-OIZH-3026-SM-3NB1G	ArteryCoronary	ArteryCoronary	0.41332
GTEX-1C6WA-1126-SM-7IGP6	ArteryCoronary	ArteryCoronary	0.415098
GTEX-13S7M-2226-SM-5S2WB	ArteryCoronary	ArteryCoronary	0.416657
GTEX-U3ZN-0426-SM-4DXSH	ArteryCoronary	ArteryCoronary	0.41843
GTEX-ZPU1-0526-SM-4YCDA	ArteryCoronary	ArteryCoronary	0.419674
GTEX-13PVR-1126-SM-5S2NX	ArteryCoronary	ArteryCoronary	0.420235
GTEX-OOBJ-3026-SM-3NB1D	ArteryCoronary	ArteryCoronary	0.42045
GTEX-14PN3-0426-SM-6LLIY	ArteryCoronary	ArteryCoronary	0.421814
GTEX-1CAMS-1226-SM-79393	ArteryCoronary	ArteryCoronary	0.421978
GTEX-Q2AH-0626-SM-48TZJ	ArteryCoronary	ArteryCoronary	0.425699
GTEX-ZF29-0126-SM-4WKGZ	ArteryCoronary	ArteryCoronary	0.427572
GTEX-VUSG-0626-SM-4KL1Z	ArteryCoronary	ArteryCoronary	0.42781
GTEX-R53T-0726-SM-48FCS	ArteryCoronary	ArteryCoronary	0.429471
GTEX-XPVG-0926-SM-4B651	ArteryCoronary	ArteryCoronary	0.430329
GTEX-QEL4-1026-SM-4R1JK	ArteryCoronary	ArteryCoronary	0.432408
GTEX-XQ8I-0326-SM-4BOPN	ArteryCoronary	ArteryCoronary	0.432984
GTEX-UJHI-0326-SM-4IHJE	ArteryCoronary	ArteryCoronary	0.433195
GTEX-1B8KE-0426-SM-7189G	ArteryCoronary	ArteryCoronary	0.435529
GTEX-1A8G6-1726-SM-73KXZ	ArteryCoronary	ArteryCoronary	0.437041
GTEX-13RTJ-0626-SM-5S2NB	ArteryCoronary	ArteryCoronary	0.437064
GTEX-WRHU-1126-SM-4E3I1	ArteryCoronary	ArteryCoronary	0.437133
GTEX-14C38-1226-SM-5S2UK	ArteryCoronary	ArteryCoronary	0.437469
GTEX-P4PP-3026-SM-3P61O	ArteryCoronary	ArteryCoronary	0.43848
GTEX-ZF3C-1326-SM-5A5MF	ArteryCoronary	ArteryCoronary	0.438933
GTEX-13X6J-1326-SM-5QGOV	ArteryCoronary	ArteryCoronary	0.440483
GTEX-XGQ4-0626-SM-4AT56	ArteryCoronary	ArteryCoronary	0.440961
GTEX-X5EB-0326-SM-4QASF	ArteryCoronary	ArteryCoronary	0.441662
GTEX-QDVN-0126-SM-4GIC9	ArteryCoronary	ArteryCoronary	0.444292
GTEX-WHPG-0726-SM-4M1XX	ArteryCoronary	ArteryCoronary	0.444709
GTEX-OHPL-3026-SM-3MJGS	ArteryCoronary	ArteryCoronary	0.444945
GTEX-Y114-0326-SM-4TT99	ArteryCoronary	ArteryCoronary	0.445251
GTEX-13FHP-1126-SM-5IJDO	ArteryCoronary	ArteryCoronary	0.445905
GTEX-147F4-1326-SM-5LU9V	ArteryCoronary	ArteryCoronary	0.446084
GTEX-WY7C-1526-SM-4OND2	ArteryCoronary	ArteryCoronary	0.448201
GTEX-14PJ6-1226-SM-6LLHJ	ArteryCoronary	ArteryCoronary	0.448681
GTEX-ZV7C-0426-SM-51MQY	ArteryCoronary	ArteryCoronary	0.449637
GTEX-SE5C-0426-SM-4BRUI	ArteryCoronary	ArteryCoronary	0.450824
GTEX-R55G-0426-SM-48FDH	ArteryCoronary	ArteryCoronary	0.451141
GTEX-Y8E4-0226-SM-4VBQ3	ArteryCoronary	ArteryCoronary	0.451412
GTEX-ZPCL-0326-SM-5FQSG	ArteryCoronary	ArteryCoronary	0.451701
GTEX-11UD2-1126-SM-5EQM6	ArteryCoronary	ArteryCoronary	0.452491
GTEX-14E7W-1026-SM-62LEK	ArteryCoronary	ArteryCoronary	0.454019
GTEX-O5YV-0426-SM-3LK66	ArteryCoronary	ArteryCoronary	0.454159
GTEX-PX3G-3026-SM-48TZR	ArteryCoronary	ArteryCoronary	0.456035
GTEX-U4B1-0226-SM-4DXU8	ArteryCoronary	ArteryCoronary	0.456049
GTEX-REY6-0926-SM-48FDA	ArteryCoronary	ArteryCoronary	0.457848
GTEX-15CHC-0526-SM-6EU23	ArteryCoronary	ArteryCoronary	0.460869
GTEX-18A67-1426-SM-718BC	ArteryCoronary	ArteryCoronary	0.460958
GTEX-12WSC-0926-SM-5EQ63	ArteryCoronary	ArteryCoronary	0.461173
GTEX-RTLS-0726-SM-46MV4	ArteryCoronary	ArteryCoronary	0.462389
GTEX-ZDYS-0126-SM-5HL6X	ArteryCoronary	ArteryCoronary	0.465746
GTEX-13O61-0626-SM-5L3D1	ArteryCoronary	ArteryCoronary	0.468085
GTEX-131YS-1226-SM-5K7VE	ArteryCoronary	ArteryCoronary	0.468614
GTEX-131XF-0526-SM-5HL87	ArteryCoronary	ArteryCoronary	0.468829
GTEX-WYJK-0926-SM-4ONCF	ArteryCoronary	ArteryCoronary	0.469252
GTEX-S4Z8-0926-SM-4AD6Q	ArteryCoronary	ArteryCoronary	0.470451
GTEX-ZT9W-0426-SM-57WF4	ArteryCoronary	ArteryCoronary	0.471939
GTEX-WFG7-0626-SM-4LMK6	ArteryCoronary	ArteryCoronary	0.476358
GTEX-Y5V6-0326-SM-4VBRW	ArteryCoronary	ArteryCoronary	0.476852
GTEX-13CF3-0626-SM-5J1NO	ArteryCoronary	ArteryCoronary	0.480686
GTEX-YEC4-0426-SM-4W1ZH	ArteryCoronary	ArteryCoronary	0.484342
GTEX-13FH7-0426-SM-5KM4M	ArteryCoronary	ArteryCoronary	0.485467
GTEX-YF7O-0226-SM-5IFJ4	ArteryCoronary	ArteryCoronary	0.486347
GTEX-1CB4E-0726-SM-7EWEY	ArteryCoronary	ArteryCoronary	0.491078
GTEX-15SHV-0726-SM-6PAMO	ArteryCoronary	ArteryCoronary	0.491177
GTEX-PWCY-0426-SM-48TCW	ArteryCoronary	ArteryCoronary	0.491845
GTEX-17F9Y-1426-SM-7IGOO	ArteryCoronary	ArteryCoronary	0.492057
GTEX-NPJ7-1326-SM-3MJHO	ArteryCoronary	ArteryCoronary	0.492129
GTEX-WHWD-0226-SM-4OORT	ArteryCoronary	ArteryCoronary	0.492555
GTEX-117YX-1726-SM-5GZZS	ArteryCoronary	ArteryCoronary	0.492589
GTEX-UJMC-0426-SM-4IHJF	ArteryCoronary	ArteryCoronary	0.493207
GTEX-ZQG8-0626-SM-57WF3	ArteryCoronary	ArteryCoronary	0.493541
GTEX-13N11-0626-SM-5J1OL	ArteryCoronary	ArteryCoronary	0.493758
GTEX-YFC4-0726-SM-62LF6	ArteryCoronary	ArteryCoronary	0.497874
GTEX-18A7A-1126-SM-7LT8O	ArteryCoronary	ArteryCoronary	0.49799
GTEX-ZYT6-0826-SM-5E43I	ArteryCoronary	ArteryCoronary	0.498514
GTEX-14XAO-1026-SM-6LLJ7	ArteryCoronary	ArteryCoronary	0.498888
GTEX-17GQL-0426-SM-7LG5V	ArteryCoronary	ArteryCoronary	0.501231
GTEX-139YR-0726-SM-62LFN	ArteryCoronary	ArteryCoronary	0.501955
GTEX-12WSE-1126-SM-7DUEH	ArteryCoronary	ArteryCoronary	0.504411
GTEX-SNMC-0226-SM-4DM6F	ArteryCoronary	ArteryCoronary	0.504861
GTEX-1AX9K-0326-SM-7DHM9	ArteryCoronary	ArteryCoronary	0.505198
GTEX-132AR-1326-SM-5K7YC	ArteryCoronary	ArteryCoronary	0.507252
GTEX-YEC3-0326-SM-5IFJJ	ArteryCoronary	ArteryCoronary	0.50775
GTEX-11DXY-1126-SM-5987W	ArteryCoronary	ArteryCoronary	0.509345
GTEX-13U4I-0926-SM-5LU5A	ArteryCoronary	ArteryCoronary	0.511577
GTEX-ZVT2-0526-SM-5E455	ArteryCoronary	ArteryCoronary	0.512034
GTEX-14H4A-0526-SM-62LEU	ArteryCoronary	ArteryCoronary	0.512682
GTEX-146FH-0926-SM-5SI96	ArteryCoronary	ArteryCoronary	0.513116
GTEX-14E1K-0926-SM-5S2U4	ArteryCoronary	ArteryCoronary	0.515246
GTEX-XPT6-0426-SM-4B672	ArteryCoronary	ArteryCoronary	0.518794
GTEX-13OVG-0726-SM-5IJBY	ArteryCoronary	ArteryCoronary	0.519101
GTEX-QMRM-0426-SM-4R1K2	ArteryCoronary	ArteryCoronary	0.52037
GTEX-12WSL-0926-SM-5N9EK	ArteryCoronary	ArteryCoronary	0.521672
GTEX-1AX8Z-1426-SM-7939T	ArteryCoronary	ArteryCoronary	0.522311
GTEX-13O21-2926-SM-5J1OU	ArteryCoronary	ArteryCoronary	0.524719
GTEX-1117F-0626-SM-5N9CS	ArteryCoronary	ArteryCoronary	0.526521
GTEX-15RJ7-0526-SM-6PANP	ArteryCoronary	ArteryCoronary	0.528778
GTEX-1122O-0426-SM-5H12G	ArteryCoronary	ArteryCoronary	0.529077
GTEX-1B8SG-0926-SM-73KV6	ArteryCoronary	ArteryCoronary	0.529879
GTEX-11TT1-1526-SM-5EQKU	ArteryCoronary	ArteryCoronary	0.532111
GTEX-1AX9I-0926-SM-73KX8	ArteryCoronary	ArteryCoronary	0.532762
GTEX-131XG-0826-SM-5LZVS	ArteryCoronary	ArteryCoronary	0.536168
GTEX-QESD-0326-SM-47J4F	ArteryCoronary	ArteryCoronary	0.539768
GTEX-12WSK-0726-SM-5LZUV	ArteryCoronary	ArteryCoronary	0.541543
GTEX-NPJ8-1326-SM-3LK6B	ArteryCoronary	ArteryCoronary	0.547815
GTEX-QEG5-1026-SM-4R1KT	ArteryCoronary	ArteryCoronary	0.550848
GTEX-11ZTT-0426-SM-5EQLK	ArteryCoronary	ArteryCoronary	0.556847
GTEX-WEY5-0326-SM-4LMI7	ArteryCoronary	ArteryCoronary	0.560548
GTEX-13W3W-0626-SM-5LU45	ArteryCoronary	ArteryCoronary	0.561849
GTEX-11I78-1026-SM-5HL74	ArteryCoronary	ArteryCoronary	0.563303
GTEX-1399U-0626-SM-5J1NZ	ArteryCoronary	ArteryCoronary	0.572365
GTEX-15DDE-1226-SM-6PAN8	ArteryCoronary	ArteryCoronary	0.572704
GTEX-1AYCT-0626-SM-7EPI5	ArteryCoronary	ArteryCoronary	0.585807
GTEX-ZGAY-0426-SM-4WWAM	ArteryCoronary	ArteryCoronary	0.589361
GTEX-RWS6-0426-SM-47JXH	ArteryCoronary	ArteryCoronary	0.640427
GTEX-YB5K-0426-SM-5LUA4	ArteryCoronary	ArteryCoronary	0.640447
GTEX-13NYB-2926-SM-5K7VH	ArteryTibial	ArteryTibial	0.103451
GTEX-15D1Q-1226-SM-686Z1	ArteryTibial	ArteryTibial	0.154151
GTEX-XUZC-2026-SM-4BRW9	ArteryTibial	ArteryTibial	0.155668
GTEX-13NZ8-1626-SM-5IJBC	ArteryTibial	ArteryTibial	0.155993
GTEX-18A67-0526-SM-7LT9X	ArteryTibial	ArteryTibial	0.158838
GTEX-VUSG-2826-SM-4KKZM	ArteryTibial	ArteryTibial	0.159235
GTEX-ZC5H-0426-SM-5HL9R	ArteryTibial	ArteryTibial	0.16054
GTEX-12126-0726-SM-5FQTX	ArteryTibial	ArteryTibial	0.164202
GTEX-139YR-2726-SM-5K7VV	ArteryTibial	ArteryTibial	0.168895
GTEX-OXRO-1926-SM-2S1O3	ArteryTibial	ArteryTibial	0.172418
GTEX-16XZZ-0426-SM-793BW	ArteryTibial	ArteryTibial	0.172874
GTEX-1269C-2826-SM-5EQ5O	ArteryTibial	ArteryTibial	0.175017
GTEX-13QBU-2226-SM-5K7WI	ArteryTibial	ArteryTibial	0.177218
GTEX-11EQ9-2226-SM-5987H	ArteryTibial	ArteryTibial	0.181759
GTEX-Q2AI-1726-SM-2S1PZ	ArteryTibial	ArteryTibial	0.182984
GTEX-147F4-0126-SM-5QGPV	ArteryTibial	ArteryTibial	0.183894
GTEX-14C39-2626-SM-5S2QD	ArteryTibial	ArteryTibial	0.184483
GTEX-SNOS-1726-SM-32PLN	ArteryTibial	ArteryTibial	0.185385
GTEX-X88G-0426-SM-47JZ5	ArteryTibial	ArteryTibial	0.18556
GTEX-1C2JI-1926-SM-73KXO	ArteryTibial	ArteryTibial	0.186436
GTEX-17EVP-1226-SM-793BF	ArteryTibial	ArteryTibial	0.186488
GTEX-T6MN-0426-SM-32PMF	ArteryTibial	ArteryTibial	0.186645
GTEX-17HHY-0526-SM-793BZ	ArteryTibial	ArteryTibial	0.186916
GTEX-U4B1-1926-SM-3DB9E	ArteryTibial	ArteryTibial	0.187266
GTEX-RUSQ-1926-SM-2TF6K	ArteryTibial	ArteryTibial	0.189064
GTEX-T5JC-0226-SM-32PMA	ArteryTibial	ArteryTibial	0.189895
GTEX-14A6H-2726-SM-5QGPL	ArteryTibial	ArteryTibial	0.190469
GTEX-ZA64-2226-SM-5Q5A9	ArteryTibial	ArteryTibial	0.191553
GTEX-13CF3-2226-SM-5J2MX	ArteryTibial	ArteryTibial	0.193659
GTEX-15UF7-2326-SM-7KUFO	ArteryTibial	ArteryTibial	0.194456
GTEX-12ZZY-0526-SM-5EQ5H	ArteryTibial	ArteryTibial	0.195935
GTEX-13NYC-0826-SM-5N9FP	ArteryTibial	ArteryTibial	0.199752
GTEX-11O72-0426-SM-5BC5B	ArteryTibial	ArteryTibial	0.200171
GTEX-SNMC-1526-SM-2XCFN	ArteryTibial	ArteryTibial	0.201389
GTEX-U8XE-0626-SM-3DB8U	ArteryTibial	ArteryTibial	0.20242
GTEX-OHPK-1826-SM-2YUMR	ArteryTibial	ArteryTibial	0.203774
GTEX-ZAB4-1926-SM-57WD8	ArteryTibial	ArteryTibial	0.205096
GTEX-QDT8-0426-SM-32PKZ	ArteryTibial	ArteryTibial	0.208636
GTEX-1AYD5-2126-SM-73KWQ	ArteryTibial	ArteryTibial	0.208638
GTEX-13OVL-1326-SM-5IJCZ	ArteryTibial	ArteryTibial	0.209428
GTEX-XPT6-2226-SM-4B66R	ArteryTibial	ArteryTibial	0.210235
GTEX-P44H-0626-SM-2XCF2	ArteryTibial	ArteryTibial	0.211082
GTEX-14PK6-2326-SM-69LOG	ArteryTibial	ArteryTibial	0.212084
GTEX-N7MS-0626-SM-2YUN7	ArteryTibial	ArteryTibial	0.213678
GTEX-1B8L1-2826-SM-793D2	ArteryTibial	ArteryTibial	0.213925
GTEX-16MTA-1926-SM-7KUG1	ArteryTibial	ArteryTibial	0.214424
GTEX-18A7B-0526-SM-7LG68	ArteryTibial	ArteryTibial	0.215738
GTEX-Q734-2226-SM-3GAD9	ArteryTibial	ArteryTibial	0.219526
GTEX-13FTW-2226-SM-5J1OH	ArteryTibial	ArteryTibial	0.221096
GTEX-RM2N-1826-SM-2TF5B	ArteryTibial	ArteryTibial	0.221637
GTEX-WYVS-2526-SM-3NMAT	ArteryTibial	ArteryTibial	0.223003
GTEX-18A6Q-0526-SM-7LG4O	ArteryTibial	ArteryTibial	0.22349
GTEX-PX3G-1826-SM-2S1PK	ArteryTibial	ArteryTibial	0.224298
GTEX-ZPIC-2426-SM-5DUW1	ArteryTibial	ArteryTibial	0.224331
GTEX-R53T-2026-SM-3GIJF	ArteryTibial	ArteryTibial	0.225951
GTEX-13113-2126-SM-5EQ4U	ArteryTibial	ArteryTibial	0.226913
GTEX-PWN1-1826-SM-2S1PE	ArteryTibial	ArteryTibial	0.233985
GTEX-1339X-2626-SM-5K7YX	ArteryTibial	ArteryTibial	0.236029
GTEX-13S86-2526-SM-5S2V5	ArteryTibial	ArteryTibial	0.236286
GTEX-PWCY-2226-SM-2S1OP	ArteryTibial	ArteryTibial	0.23732
GTEX-11GS4-2926-SM-5A5LF	ArteryTibial	ArteryTibial	0.237752
GTEX-OHPM-1826-SM-2YUNF	ArteryTibial	ArteryTibial	0.237752
GTEX-WFON-2526-SM-3LK7P	ArteryTibial	ArteryTibial	0.237783
GTEX-145MN-2326-SM-5SIB7	ArteryTibial	ArteryTibial	0.238911
GTEX-ZDTS-0426-SM-4WAYH	ArteryTibial	ArteryTibial	0.240308
GTEX-U3ZN-2526-SM-3DB7V	ArteryTibial	ArteryTibial	0.242681
GTEX-12WSN-2726-SM-5LZUK	ArteryTibial	ArteryTibial	0.244804
GTEX-1117F-0526-SM-5EGHJ	ArteryTibial	ArteryTibial	0.244822
GTEX-RVPV-0226-SM-2TF6W	ArteryTibial	ArteryTibial	0.249624
GTEX-147JS-0726-SM-5S2UL	ArteryTibial	ArteryTibial	0.249686
GTEX-12ZZW-0426-SM-5GCO9	ArteryTibial	ArteryTibial	0.251753
GTEX-WY7C-2826-SM-3NB3Q	ArteryTibial	ArteryTibial	0.254748
GTEX-14DAR-2126-SM-5RQID	ArteryTibial	ArteryTibial	0.254841
GTEX-12WSC-0526-SM-5BC5X	ArteryTibial	ArteryTibial	0.25728
GTEX-QV44-2226-SM-447A3	ArteryTibial	ArteryTibial	0.258569
GTEX-ZLWG-2426-SM-57WG6	ArteryTibial	ArteryTibial	0.259873
GTEX-OXRP-2426-SM-2S1NR	ArteryTibial	ArteryTibial	0.26029
GTEX-16YQH-0626-SM-7938I	ArteryTibial	ArteryTibial	0.261844
GTEX-XUYS-0426-SM-47JX3	ArteryTibial	ArteryTibial	0.262503
GTEX-132NY-0626-SM-5L3D9	ArteryTibial	ArteryTibial	0.263685
GTEX-RU72-1226-SM-2TF6N	ArteryTibial	ArteryTibial	0.263917
GTEX-XMK1-2526-SM-4B666	ArteryTibial	ArteryTibial	0.264911
GTEX-XGQ4-2426-SM-4AT55	ArteryTibial	ArteryTibial	0.265018
GTEX-13O61-2526-SM-5J1O8	ArteryTibial	ArteryTibial	0.265204
GTEX-W5WG-2226-SM-4LMI3	ArteryTibial	ArteryTibial	0.267432
GTEX-13VXU-0526-SM-5K7V1	ArteryTibial	ArteryTibial	0.268297
GTEX-UJHI-1926-SM-3DB8Z	ArteryTibial	ArteryTibial	0.270616
GTEX-11EMC-3026-SM-5EQ4R	ArteryTibial	ArteryTibial	0.271093
GTEX-133LE-2226-SM-5IFGU	ArteryTibial	ArteryTibial	0.274107
GTEX-14B4R-2026-SM-5QGQL	ArteryTibial	ArteryTibial	0.275029
GTEX-ZZ64-1326-SM-5E444	ArteryTibial	ArteryTibial	0.275753
GTEX-1A3MW-0426-SM-731AI	ArteryTibial	ArteryTibial	0.276563
GTEX-12WSK-2726-SM-5CVND	ArteryTibial	ArteryTibial	0.277739
GTEX-RTLS-0426-SM-2TF5K	ArteryTibial	ArteryTibial	0.279387
GTEX-113IC-0426-SM-5HL5O	ArteryTibial	ArteryTibial	0.280201
GTEX-WHWD-2426-SM-3LK6S	ArteryTibial	ArteryTibial	0.280617
GTEX-14AS3-2326-SM-5S2NZ	ArteryTibial	ArteryTibial	0.280799
GTEX-1B8KZ-2226-SM-73KYS	ArteryTibial	ArteryTibial	0.282709
GTEX-1B932-0426-SM-73KX4	ArteryTibial	ArteryTibial	0.283101
GTEX-OIZI-0526-SM-2XCEG	ArteryTibial	ArteryTibial	0.284685
GTEX-QEG5-0626-SM-2S1PP	ArteryTibial	ArteryTibial	0.294359
GTEX-S33H-2426-SM-2XCB2	ArteryTibial	ArteryTibial	0.295535
GTEX-145LU-0826-SM-79OJJ	ArteryTibial	ArteryTibial	0.296167
GTEX-13O3Q-2526-SM-5IJC4	ArteryTibial	ArteryTibial	0.297135
GTEX-RWS6-2326-SM-2XCB4	ArteryTibial	ArteryTibial	0.297744
GTEX-178AV-1926-SM-7KUL9	ArteryTibial	ArteryTibial	0.298699
GTEX-OXRL-1826-SM-2YUMV	ArteryTibial	ArteryTibial	0.299522
GTEX-ZT9X-2026-SM-57WEJ	ArteryTibial	ArteryTibial	0.302003
GTEX-O5YT-1826-SM-32PK9	ArteryTibial	ArteryTibial	0.303416
GTEX-YBZK-0226-SM-59HLO	ArteryTibial	ArteryTibial	0.304133
GTEX-13O21-2526-SM-5J1OZ	ArteryTibial	ArteryTibial	0.305273
GTEX-QXCU-0226-SM-2TC5W	ArteryTibial	ArteryTibial	0.305353
GTEX-PLZ4-1326-SM-2S1O7	ArteryTibial	ArteryTibial	0.305806
GTEX-P4QS-1826-SM-2S1NI	ArteryTibial	ArteryTibial	0.310435
GTEX-14PJN-2226-SM-6872I	ArteryTibial	ArteryTibial	0.315383
GTEX-U3ZH-1726-SM-3DB79	ArteryTibial	ArteryTibial	0.317971
GTEX-131XW-0226-SM-5IJCA	ArteryTibial	ArteryTibial	0.319989
GTEX-SN8G-0526-SM-32PLE	ArteryTibial	ArteryTibial	0.324163
GTEX-P4QT-1826-SM-2S1NJ	ArteryTibial	ArteryTibial	0.330849
GTEX-O5YV-1626-SM-2YUNJ	ArteryTibial	ArteryTibial	0.331033
GTEX-UJMC-2026-SM-3GADR	ArteryTibial	ArteryTibial	0.333304
GTEX-QEL4-0526-SM-3GIJ4	ArteryTibial	ArteryTibial	0.334908
GTEX-Z9EW-1926-SM-5CVMP	ArteryTibial	ArteryTibial	0.337353
GTEX-14753-0226-SM-5Q5CH	ArteryTibial	ArteryTibial	0.34126
GTEX-PVOW-0726-SM-2XCF5	ArteryTibial	ArteryTibial	0.341793
GTEX-15DZA-2226-SM-7KUMY	ArteryTibial	ArteryTibial	0.345579
GTEX-OXRK-0526-SM-3NB2F	ArteryTibial	ArteryTibial	0.34764
GTEX-QDVN-2326-SM-2S1PF	ArteryTibial	ArteryTibial	0.35715
GTEX-14BIN-0926-SM-5S2OZ	ArteryTibial	ArteryTibial	0.358233
GTEX-132Q8-0526-SM-5IJBQ	ArteryTibial	ArteryTibial	0.35854
GTEX-O5YW-1826-SM-2YUN2	ArteryTibial	ArteryTibial	0.362105
GTEX-11ONC-2726-SM-5N9DZ	ArteryTibial	ArteryTibial	0.363249
GTEX-SJXC-0426-SM-2XCFH	ArteryTibial	ArteryTibial	0.368465
GTEX-17F9Y-0826-SM-7LG52	ArteryTibial	ArteryTibial	0.370109
GTEX-QEG4-1226-SM-2S1P6	ArteryTibial	ArteryTibial	0.371068
GTEX-YFC4-0926-SM-5S2U7	ArteryTibial	ArteryTibial	0.37108
GTEX-13O3P-0526-SM-5K7UT	ArteryTibial	ArteryTibial	0.37163
GTEX-11ZVC-2926-SM-5986H	ArteryTibial	ArteryTibial	0.379535
GTEX-S95S-1626-SM-2XCDJ	ArteryTibial	ArteryTibial	0.380188
GTEX-13OVH-0426-SM-5K7UC	ArteryTibial	ArteryTibial	0.381102
GTEX-14PKU-2226-SM-7LG5T	ArteryTibial	ArteryTibial	0.386089
GTEX-11DXZ-2626-SM-59882	ArteryTibial	ArteryTibial	0.386396
GTEX-11EM3-2226-SM-5H11Y	ArteryTibial	ArteryTibial	0.387011
GTEX-TKQ2-1026-SM-33HB7	ArteryTibial	ArteryTibial	0.387326
GTEX-1AMFI-2426-SM-73KWO	ArteryTibial	ArteryTibial	0.388416
GTEX-13NYS-0526-SM-5J1OF	ArteryTibial	ArteryTibial	0.388877
GTEX-S341-2026-SM-2XCAA	ArteryTibial	ArteryTibial	0.389155
GTEX-ZY6K-1926-SM-5GZXW	ArteryTibial	ArteryTibial	0.389294
GTEX-OIZH-1826-SM-2YUNP	ArteryTibial	ArteryTibial	0.390182
GTEX-14PJ3-2126-SM-5ZZVL	ArteryTibial	ArteryTibial	0.390218
GTEX-11NUK-0526-SM-5A5L5	ArteryTibial	ArteryTibial	0.390226
GTEX-12584-0426-SM-5FQTT	ArteryTibial	ArteryTibial	0.391493
GTEX-14E6E-2126-SM-664N6	ArteryTibial	ArteryTibial	0.392541
GTEX-13JVG-0426-SM-5MR59	ArteryTibial	ArteryTibial	0.39265
GTEX-13OVK-1726-SM-7KUE9	ArteryTibial	ArteryTibial	0.394293
GTEX-13VXT-0526-SM-5SI9O	ArteryTibial	ArteryTibial	0.394738
GTEX-SSA3-0426-SM-32QPI	ArteryTibial	ArteryTibial	0.395042
GTEX-11WQC-2726-SM-5CVLG	ArteryTibial	ArteryTibial	0.39606
GTEX-12WSL-2626-SM-5GCNV	ArteryTibial	ArteryTibial	0.396114
GTEX-16AAH-1926-SM-7LG4C	ArteryTibial	ArteryTibial	0.397421
GTEX-17GQL-2226-SM-718BB	ArteryTibial	ArteryTibial	0.398505
GTEX-11ZUS-1326-SM-5FQUC	ArteryTibial	ArteryTibial	0.400662
GTEX-12696-2726-SM-5FQUL	ArteryTibial	ArteryTibial	0.401121
GTEX-WHSE-1126-SM-3NMBU	ArteryTibial	ArteryTibial	0.403135
GTEX-145LS-0426-SM-5LU8M	ArteryTibial	ArteryTibial	0.403319
GTEX-1A8G6-0226-SM-79ONQ	ArteryTibial	ArteryTibial	0.403783
GTEX-18QFQ-0526-SM-718AV	ArteryTibial	ArteryTibial	0.404949
GTEX-131XF-2526-SM-5EQ68	ArteryTibial	ArteryTibial	0.405238
GTEX-11GSP-2926-SM-5N9C2	ArteryTibial	ArteryTibial	0.405547
GTEX-13QIC-1626-SM-5K7TZ	ArteryTibial	ArteryTibial	0.407001
GTEX-ZDTT-2426-SM-4WKFX	ArteryTibial	ArteryTibial	0.408229
GTEX-NFK9-0526-SM-2YUNL	ArteryTibial	ArteryTibial	0.40829
GTEX-13PVQ-0526-SM-5LU8Q	ArteryTibial	ArteryTibial	0.409751
GTEX-1A3MV-2226-SM-731CP	ArteryTibial	ArteryTibial	0.409905
GTEX-13NZB-2226-SM-5MR5B	ArteryTibial	ArteryTibial	0.411087
GTEX-16GPK-0426-SM-6PAMW	ArteryTibial	ArteryTibial	0.412764
GTEX-PSDG-0526-SM-2S1OH	ArteryTibial	ArteryTibial	0.413048
GTEX-12ZZX-0526-SM-5DUW6	ArteryTibial	ArteryTibial	0.41421
GTEX-ZT9W-2726-SM-57WG8	ArteryTibial	ArteryTibial	0.414448
GTEX-13FH7-2326-SM-5KM1E	ArteryTibial	ArteryTibial	0.415949
GTEX-ZAKK-0426-SM-5EGHB	ArteryTibial	ArteryTibial	0.417545
GTEX-17F98-0926-SM-7DHLT	ArteryTibial	ArteryTibial	0.418781
GTEX-Z93T-0426-SM-5HL6G	ArteryTibial	ArteryTibial	0.419469
GTEX-OOBJ-1826-SM-3NB1C	ArteryTibial	ArteryTibial	0.419477
GTEX-17HII-0626-SM-7LT9H	ArteryTibial	ArteryTibial	0.420097
GTEX-13U4I-0426-SM-5LU4W	ArteryTibial	ArteryTibial	0.420405
GTEX-11EI6-0526-SM-5985S	ArteryTibial	ArteryTibial	0.420538
GTEX-14E7W-0526-SM-5S2W8	ArteryTibial	ArteryTibial	0.420835
GTEX-17EVQ-1126-SM-7LG58	ArteryTibial	ArteryTibial	0.420898
GTEX-WZTO-1126-SM-3NM93	ArteryTibial	ArteryTibial	0.421009
GTEX-11LCK-1426-SM-5HL5R	ArteryTibial	ArteryTibial	0.423486
GTEX-14PII-0526-SM-6EU2A	ArteryTibial	ArteryTibial	0.423935
GTEX-VJYA-1826-SM-4KL1W	ArteryTibial	ArteryTibial	0.424942
GTEX-1C4CL-0126-SM-7IGN5	ArteryTibial	ArteryTibial	0.427
GTEX-ZF3C-0526-SM-4WWBG	ArteryTibial	ArteryTibial	0.42744
GTEX-14JG1-0326-SM-62LDO	ArteryTibial	ArteryTibial	0.427929
GTEX-183FY-0526-SM-7939Z	ArteryTibial	ArteryTibial	0.42881
GTEX-1C6VR-2826-SM-7EWEE	ArteryTibial	ArteryTibial	0.429272
GTEX-1C6VQ-0726-SM-7EPI6	ArteryTibial	ArteryTibial	0.430047
GTEX-1CAMQ-0426-SM-7IGPL	ArteryTibial	ArteryTibial	0.430397
GTEX-ZTPG-0426-SM-5O98K	ArteryTibial	ArteryTibial	0.430776
GTEX-14C5O-0526-SM-62LEI	ArteryTibial	ArteryTibial	0.433347
GTEX-WRHU-0726-SM-3MJFL	ArteryTibial	ArteryTibial	0.433715
GTEX-13JUV-2426-SM-5J1NS	ArteryTibial	ArteryTibial	0.433723
GTEX-13N11-2926-SM-5K7VD	ArteryTibial	ArteryTibial	0.433963
GTEX-13PLJ-0526-SM-5K7VW	ArteryTibial	ArteryTibial	0.433985
GTEX-1399S-2626-SM-5L3DU	ArteryTibial	ArteryTibial	0.434109
GTEX-XYKS-2626-SM-4BRUT	ArteryTibial	ArteryTibial	0.434293
GTEX-145MF-0426-SM-5LU9T	ArteryTibial	ArteryTibial	0.435155
GTEX-15SKB-0526-SM-6PAMP	ArteryTibial	ArteryTibial	0.43537
GTEX-YECK-0526-SM-4W1ZD	ArteryTibial	ArteryTibial	0.435614
GTEX-15EU6-0726-SM-7KUFU	ArteryTibial	ArteryTibial	0.435751
GTEX-Y5LM-2326-SM-5S2NK	ArteryTibial	ArteryTibial	0.436268
GTEX-11UD2-0526-SM-5GU69	ArteryTibial	ArteryTibial	0.436679
GTEX-ZGAY-0926-SM-4WWBQ	ArteryTibial	ArteryTibial	0.436823
GTEX-131XH-2426-SM-5PNZ6	ArteryTibial	ArteryTibial	0.438742
GTEX-ZPU1-2726-SM-4WWFT	ArteryTibial	ArteryTibial	0.439219
GTEX-15DDE-0426-SM-6M48M	ArteryTibial	ArteryTibial	0.439471
GTEX-13FTX-2226-SM-5J1OP	ArteryTibial	ArteryTibial	0.439754
GTEX-14E1K-2526-SM-5ZZWA	ArteryTibial	ArteryTibial	0.439859
GTEX-17MFQ-2126-SM-7LG5W	ArteryTibial	ArteryTibial	0.440645
GTEX-ZLV1-1926-SM-5FQSF	ArteryTibial	ArteryTibial	0.441664
GTEX-12BJ1-2726-SM-5HL9M	ArteryTibial	ArteryTibial	0.441773
GTEX-13FHP-0426-SM-5J1O5	ArteryTibial	ArteryTibial	0.441941
GTEX-16NPV-0526-SM-79OKI	ArteryTibial	ArteryTibial	0.442032
GTEX-ZV6S-2026-SM-5NQ8P	ArteryTibial	ArteryTibial	0.442054
GTEX-RWSA-0526-SM-2XCBC	ArteryTibial	ArteryTibial	0.442173
GTEX-11VI4-2026-SM-5CVLJ	ArteryTibial	ArteryTibial	0.443073
GTEX-11DXW-0526-SM-5H127	ArteryTibial	ArteryTibial	0.443456
GTEX-PLZ6-1626-SM-3NB23	ArteryTibial	ArteryTibial	0.443564
GTEX-15CHQ-0626-SM-6AJ9E	ArteryTibial	ArteryTibial	0.443806
GTEX-11P81-2726-SM-59876	ArteryTibial	ArteryTibial	0.444147
GTEX-16MT8-0126-SM-7DHLD	ArteryTibial	ArteryTibial	0.444155
GTEX-UPJH-0726-SM-4IHJW	ArteryTibial	ArteryTibial	0.444267
GTEX-XLM4-0426-SM-4AT54	ArteryTibial	ArteryTibial	0.444466
GTEX-11NV4-0526-SM-5N9BF	ArteryTibial	ArteryTibial	0.445133
GTEX-1A8G7-0426-SM-731B5	ArteryTibial	ArteryTibial	0.445171
GTEX-13W3W-2826-SM-731E5	ArteryTibial	ArteryTibial	0.445253
GTEX-12WSM-0526-SM-5GCO8	ArteryTibial	ArteryTibial	0.445377
GTEX-Y5V5-2726-SM-4VDS2	ArteryTibial	ArteryTibial	0.445464
GTEX-XPVG-2926-SM-4B66G	ArteryTibial	ArteryTibial	0.446686
GTEX-YEC4-2326-SM-5IFHV	ArteryTibial	ArteryTibial	0.447523
GTEX-1B996-0626-SM-79OJP	ArteryTibial	ArteryTibial	0.447621
GTEX-T6MO-1926-SM-32QOJ	ArteryTibial	ArteryTibial	0.448393
GTEX-P78B-0726-SM-2S1O2	ArteryTibial	ArteryTibial	0.4494
GTEX-13N1W-0326-SM-5IJDJ	ArteryTibial	ArteryTibial	0.449628
GTEX-14PN4-0426-SM-6AJ9N	ArteryTibial	ArteryTibial	0.450829
GTEX-12WSH-2826-SM-5GCP5	ArteryTibial	ArteryTibial	0.451126
GTEX-XBEW-0826-SM-4QASQ	ArteryTibial	ArteryTibial	0.451191
GTEX-OXRN-1226-SM-2I5EL	ArteryTibial	ArteryTibial	0.451373
GTEX-1399T-2626-SM-5L3E4	ArteryTibial	ArteryTibial	0.451654
GTEX-15RJE-0526-SM-6PAMN	ArteryTibial	ArteryTibial	0.451837
GTEX-XUW1-0726-SM-4BOP5	ArteryTibial	ArteryTibial	0.451898
GTEX-146FH-0426-SM-5QGPS	ArteryTibial	ArteryTibial	0.45352
GTEX-QV31-1626-SM-2S1QC	ArteryTibial	ArteryTibial	0.453671
GTEX-XAJ8-1226-SM-47JYS	ArteryTibial	ArteryTibial	0.454364
GTEX-S7SE-0526-SM-2XCD8	ArteryTibial	ArteryTibial	0.454786
GTEX-WWYW-0426-SM-3NB31	ArteryTibial	ArteryTibial	0.454963
GTEX-NPJ8-1826-SM-2YUNC	ArteryTibial	ArteryTibial	0.455044
GTEX-Q2AG-0526-SM-2S1PW	ArteryTibial	ArteryTibial	0.455224
GTEX-1B8SF-0726-SM-73KYZ	ArteryTibial	ArteryTibial	0.455897
GTEX-1C64O-0526-SM-793D6	ArteryTibial	ArteryTibial	0.45753
GTEX-13OVG-2326-SM-5J1OV	ArteryTibial	ArteryTibial	0.457985
GTEX-14PJ5-1926-SM-6LLIM	ArteryTibial	ArteryTibial	0.458818
GTEX-132AR-0726-SM-5EQ6J	ArteryTibial	ArteryTibial	0.458831
GTEX-13OW6-0326-SM-5L3H9	ArteryTibial	ArteryTibial	0.459294
GTEX-145MO-0626-SM-5NQAW	ArteryTibial	ArteryTibial	0.460813
GTEX-OHPN-2826-SM-3LK67	ArteryTibial	ArteryTibial	0.461337
GTEX-QDVJ-2126-SM-5S2U2	ArteryTibial	ArteryTibial	0.461353
GTEX-P4PP-1826-SM-2S1NT	ArteryTibial	ArteryTibial	0.461919
GTEX-RN64-0526-SM-2TC5P	ArteryTibial	ArteryTibial	0.462469
GTEX-RU1J-1926-SM-2TF6S	ArteryTibial	ArteryTibial	0.463467
GTEX-WL46-0526-SM-3LK7W	ArteryTibial	ArteryTibial	0.46421
GTEX-XQ8I-0826-SM-4BOOE	ArteryTibial	ArteryTibial	0.464348
GTEX-WRHK-1726-SM-3MJFK	ArteryTibial	ArteryTibial	0.464469
GTEX-Q2AH-2026-SM-2S1PX	ArteryTibial	ArteryTibial	0.465588
GTEX-T8EM-1626-SM-3DB7K	ArteryTibial	ArteryTibial	0.466007
GTEX-11TUW-2926-SM-5BC59	ArteryTibial	ArteryTibial	0.466566
GTEX-X4EP-0826-SM-3P5YK	ArteryTibial	ArteryTibial	0.466621
GTEX-1A32A-0426-SM-7939P	ArteryTibial	ArteryTibial	0.467141
GTEX-1212Z-2826-SM-59HJ5	ArteryTibial	ArteryTibial	0.467838
GTEX-14BMV-0526-SM-5S2NE	ArteryTibial	ArteryTibial	0.468154
GTEX-17F97-0226-SM-7LG6Q	ArteryTibial	ArteryTibial	0.46819
GTEX-ZP4G-2126-SM-57WEA	ArteryTibial	ArteryTibial	0.469121
GTEX-146FQ-0526-SM-5LU9I	ArteryTibial	ArteryTibial	0.470086
GTEX-14ICL-1826-SM-5RQIY	ArteryTibial	ArteryTibial	0.470297
GTEX-POMQ-2126-SM-2S1OJ	ArteryTibial	ArteryTibial	0.471394
GTEX-WCDI-0426-SM-4GIAL	ArteryTibial	ArteryTibial	0.47147
GTEX-ZXG5-0526-SM-5NQ7S	ArteryTibial	ArteryTibial	0.471762
GTEX-13W46-0626-SM-5LU3N	ArteryTibial	ArteryTibial	0.472684
GTEX-15G1A-2326-SM-6PAMJ	ArteryTibial	ArteryTibial	0.473373
GTEX-TKQ1-1226-SM-4GICJ	ArteryTibial	ArteryTibial	0.474459
GTEX-ZVP2-2226-SM-5GU6Q	ArteryTibial	ArteryTibial	0.475401
GTEX-131XE-2626-SM-5PNYY	ArteryTibial	ArteryTibial	0.475876
GTEX-ZYVF-0826-SM-5E447	ArteryTibial	ArteryTibial	0.477478
GTEX-Z93S-0926-SM-5HL8B	ArteryTibial	ArteryTibial	0.477655
GTEX-1CB4F-0726-SM-793AO	ArteryTibial	ArteryTibial	0.478454
GTEX-11TT1-2726-SM-5LU8L	ArteryTibial	ArteryTibial	0.47864
GTEX-11I78-2326-SM-5Q5AH	ArteryTibial	ArteryTibial	0.479043
GTEX-148VJ-0426-SM-5S2V8	ArteryTibial	ArteryTibial	0.479914
GTEX-15UF6-0726-SM-6PALI	ArteryTibial	ArteryTibial	0.480113
GTEX-XBED-2426-SM-4AT4O	ArteryTibial	ArteryTibial	0.48035
GTEX-15D79-0426-SM-6AJAW	ArteryTibial	ArteryTibial	0.480735
GTEX-V1D1-2626-SM-4JBJH	ArteryTibial	ArteryTibial	0.480981
GTEX-145ME-2226-SM-5S2VY	ArteryTibial	ArteryTibial	0.481572
GTEX-X261-0526-SM-4PQYS	ArteryTibial	ArteryTibial	0.482783
GTEX-17MF6-0526-SM-7LG4H	ArteryTibial	ArteryTibial	0.483072
GTEX-YEC3-1126-SM-5IFIH	ArteryTibial	ArteryTibial	0.483282
GTEX-QCQG-1926-SM-5SI7Q	ArteryTibial	ArteryTibial	0.483538
GTEX-V955-2626-SM-3NM9F	ArteryTibial	ArteryTibial	0.483632
GTEX-ZAK1-0426-SM-5J1MS	ArteryTibial	ArteryTibial	0.483782
GTEX-15EOM-0526-SM-7KUFY	ArteryTibial	ArteryTibial	0.483788
GTEX-Y3IK-2826-SM-4WWDW	ArteryTibial	ArteryTibial	0.484601
GTEX-11XUK-2426-SM-5GU72	ArteryTibial	ArteryTibial	0.484803
GTEX-ZF2S-2426-SM-5DUXV	ArteryTibial	ArteryTibial	0.485068
GTEX-11ZTS-0326-SM-5EQKP	ArteryTibial	ArteryTibial	0.485567
GTEX-U8T8-0326-SM-3DB93	ArteryTibial	ArteryTibial	0.485996
GTEX-R55C-1826-SM-3GADI	ArteryTibial	ArteryTibial	0.486404
GTEX-147F3-0426-SM-5SI8V	ArteryTibial	ArteryTibial	0.487271
GTEX-17HHE-2326-SM-793C5	ArteryTibial	ArteryTibial	0.488244
GTEX-ZYFD-0526-SM-5E442	ArteryTibial	ArteryTibial	0.488273
GTEX-1BAJH-0226-SM-7EPHQ	ArteryTibial	ArteryTibial	0.48913
GTEX-WYBS-0426-SM-3NM9M	ArteryTibial	ArteryTibial	0.489244
GTEX-13X6H-2526-SM-5QGOT	ArteryTibial	ArteryTibial	0.489403
GTEX-18D9U-0926-SM-731AZ	ArteryTibial	ArteryTibial	0.489522
GTEX-ZAB5-2026-SM-5L3EQ	ArteryTibial	ArteryTibial	0.489563
GTEX-15ETS-2426-SM-6PANJ	ArteryTibial	ArteryTibial	0.489663
GTEX-X4XY-0526-SM-46MW1	ArteryTibial	ArteryTibial	0.490076
GTEX-13PVR-2726-SM-5SI6H	ArteryTibial	ArteryTibial	0.490754
GTEX-1B97I-1926-SM-7DUGC	ArteryTibial	ArteryTibial	0.491075
GTEX-14A5H-0226-SM-5S2VK	ArteryTibial	ArteryTibial	0.493806
GTEX-WFG7-2326-SM-3GIKV	ArteryTibial	ArteryTibial	0.494344
GTEX-13QJ3-0626-SM-5SI6G	ArteryTibial	ArteryTibial	0.494553
GTEX-Y5V6-2826-SM-4VDSF	ArteryTibial	ArteryTibial	0.495254
GTEX-18A7A-0526-SM-718BI	ArteryTibial	ArteryTibial	0.496175
GTEX-13G51-2926-SM-5IJDL	ArteryTibial	ArteryTibial	0.496862
GTEX-X62O-1626-SM-46MW9	ArteryTibial	ArteryTibial	0.497778
GTEX-14DAQ-0526-SM-793AY	ArteryTibial	ArteryTibial	0.497977
GTEX-ZVE2-0526-SM-5GU7E	ArteryTibial	ArteryTibial	0.498575
GTEX-ZVZP-2726-SM-5GZXZ	ArteryTibial	ArteryTibial	0.498665
GTEX-146FR-1626-SM-5Q5DS	ArteryTibial	ArteryTibial	0.49896
GTEX-144GL-0526-SM-5LU41	ArteryTibial	ArteryTibial	0.500074
GTEX-OHPL-1826-SM-2YUN8	ArteryTibial	ArteryTibial	0.50165
GTEX-WHPG-2326-SM-3NMBP	ArteryTibial	ArteryTibial	0.502108
GTEX-14BMU-2426-SM-5RQIJ	ArteryTibial	ArteryTibial	0.50404
GTEX-11P7K-2326-SM-5EGKZ	ArteryTibial	ArteryTibial	0.505066
GTEX-111YS-2226-SM-5987P	ArteryTibial	ArteryTibial	0.505237
GTEX-13PL6-0526-SM-5L3G6	ArteryTibial	ArteryTibial	0.505442
GTEX-13X6K-0526-SM-5LU51	ArteryTibial	ArteryTibial	0.507007
GTEX-ZVZO-0426-SM-5HL4Z	ArteryTibial	ArteryTibial	0.507477
GTEX-1211K-2426-SM-59HL8	ArteryTibial	ArteryTibial	0.507794
GTEX-14PHY-2726-SM-62LE2	ArteryTibial	ArteryTibial	0.508188
GTEX-144GM-2226-SM-5O9B5	ArteryTibial	ArteryTibial	0.508597
GTEX-139UW-2526-SM-62LFO	ArteryTibial	ArteryTibial	0.50865
GTEX-VJWN-0626-SM-3NMAN	ArteryTibial	ArteryTibial	0.509142
GTEX-13OW7-0626-SM-5K7UD	ArteryTibial	ArteryTibial	0.510497
GTEX-117YX-2626-SM-5EQ53	ArteryTibial	ArteryTibial	0.510578
GTEX-X5EB-2626-SM-4E3HZ	ArteryTibial	ArteryTibial	0.510925
GTEX-14E6C-1126-SM-62LDM	ArteryTibial	ArteryTibial	0.511343
GTEX-12C56-2026-SM-5FQSI	ArteryTibial	ArteryTibial	0.513158
GTEX-13NZ9-0826-SM-5J1NI	ArteryTibial	ArteryTibial	0.514389
GTEX-13FTY-0426-SM-5IJC2	ArteryTibial	ArteryTibial	0.514657
GTEX-13111-2126-SM-5LZU2	ArteryTibial	ArteryTibial	0.514965
GTEX-ZDYS-1626-SM-4WKGB	ArteryTibial	ArteryTibial	0.515823
GTEX-13QJC-2526-SM-7DHKJ	ArteryTibial	ArteryTibial	0.516227
GTEX-131YS-0426-SM-5EQ4J	ArteryTibial	ArteryTibial	0.516519
GTEX-1399R-2326-SM-5PNYT	ArteryTibial	ArteryTibial	0.516673
GTEX-14PJM-0626-SM-686ZN	ArteryTibial	ArteryTibial	0.517705
GTEX-Y8DK-0526-SM-4TT3R	ArteryTibial	ArteryTibial	0.518423
GTEX-13D11-2726-SM-5K7V7	ArteryTibial	ArteryTibial	0.518883
GTEX-13RTL-0426-SM-7LG66	ArteryTibial	ArteryTibial	0.519227
GTEX-ZZPU-2426-SM-5E44I	ArteryTibial	ArteryTibial	0.520135
GTEX-Y114-2726-SM-4TT9B	ArteryTibial	ArteryTibial	0.520555
GTEX-XOT4-0426-SM-4B66T	ArteryTibial	ArteryTibial	0.521128
GTEX-WEY5-2126-SM-3GILK	ArteryTibial	ArteryTibial	0.52198
GTEX-11OC5-0426-SM-5Q5AR	ArteryTibial	ArteryTibial	0.523731
GTEX-1B8SG-0526-SM-73KWP	ArteryTibial	ArteryTibial	0.524385
GTEX-XBEC-0526-SM-4QARU	ArteryTibial	ArteryTibial	0.526002
GTEX-S7PM-0426-SM-3NM91	ArteryTibial	ArteryTibial	0.526003
GTEX-YB5K-2526-SM-62LEW	ArteryTibial	ArteryTibial	0.527312
GTEX-1128S-2526-SM-5H11N	ArteryTibial	ArteryTibial	0.5304
GTEX-RNOR-0426-SM-2TF4U	ArteryTibial	ArteryTibial	0.530458
GTEX-Y9LG-2326-SM-4VDS1	ArteryTibial	ArteryTibial	0.530817
GTEX-13PL7-2126-SM-5L3HZ	ArteryTibial	ArteryTibial	0.53109
GTEX-ZVT2-2626-SM-51MTD	ArteryTibial	ArteryTibial	0.531234
GTEX-14JG6-2026-SM-6EU2E	ArteryTibial	ArteryTibial	0.532622
GTEX-17F9E-0526-SM-7DUFD	ArteryTibial	ArteryTibial	0.532773
GTEX-TSE9-0426-SM-3DB81	ArteryTibial	ArteryTibial	0.532789
GTEX-13O3O-0426-SM-5KM2Y	ArteryTibial	ArteryTibial	0.533575
GTEX-15SHW-0626-SM-6PALH	ArteryTibial	ArteryTibial	0.534342
GTEX-17HGU-0526-SM-793BX	ArteryTibial	ArteryTibial	0.534546
GTEX-ZYFC-0726-SM-5E448	ArteryTibial	ArteryTibial	0.534578
GTEX-18A66-0526-SM-7LG5O	ArteryTibial	ArteryTibial	0.534767
GTEX-17EUY-0326-SM-7DUEY	ArteryTibial	ArteryTibial	0.535197
GTEX-111FC-0426-SM-5N9CV	ArteryTibial	ArteryTibial	0.536154
GTEX-YJ8A-0826-SM-5Q5A7	ArteryTibial	ArteryTibial	0.537256
GTEX-WYJK-0426-SM-3NM9G	ArteryTibial	ArteryTibial	0.540059
GTEX-ZYT6-1526-SM-5E45F	ArteryTibial	ArteryTibial	0.54028
GTEX-YJ8O-2726-SM-5IFJ7	ArteryTibial	ArteryTibial	0.540327
GTEX-ZVT3-0426-SM-5GIDW	ArteryTibial	ArteryTibial	0.540449
GTEX-ZQUD-1326-SM-57WEF	ArteryTibial	ArteryTibial	0.541253
GTEX-18465-0426-SM-7LTAE	ArteryTibial	ArteryTibial	0.54246
GTEX-17KNJ-2526-SM-7DUFR	ArteryTibial	ArteryTibial	0.542563
GTEX-15SDE-2526-SM-6PAL5	ArteryTibial	ArteryTibial	0.543119
GTEX-ZUA1-0626-SM-4YCCW	ArteryTibial	ArteryTibial	0.543362
GTEX-S32W-2426-SM-2XCAT	ArteryTibial	ArteryTibial	0.543795
GTEX-1AX9K-2626-SM-793CO	ArteryTibial	ArteryTibial	0.546291
GTEX-117YW-2726-SM-5GZZT	ArteryTibial	ArteryTibial	0.546809
GTEX-14JFF-0526-SM-62LFL	ArteryTibial	ArteryTibial	0.547479
GTEX-1A3MX-0426-SM-72D5W	ArteryTibial	ArteryTibial	0.550656
GTEX-YB5E-2426-SM-5IFIV	ArteryTibial	ArteryTibial	0.552494
GTEX-11EQ8-0426-SM-5N9DP	ArteryTibial	ArteryTibial	0.552989
GTEX-1AX8Z-0526-SM-7939M	ArteryTibial	ArteryTibial	0.555367
GTEX-PW2O-1926-SM-2S1OB	ArteryTibial	ArteryTibial	0.556319
GTEX-ZYW4-0426-SM-5GZYS	ArteryTibial	ArteryTibial	0.556734
GTEX-131XG-2226-SM-5DUXS	ArteryTibial	ArteryTibial	0.557029
GTEX-11DXX-2626-SM-5Q5A3	ArteryTibial	ArteryTibial	0.5576
GTEX-139TT-0526-SM-5J1NN	ArteryTibial	ArteryTibial	0.558798
GTEX-1B8KE-2326-SM-7939L	ArteryTibial	ArteryTibial	0.563579
GTEX-139T8-0426-SM-5K7VC	ArteryTibial	ArteryTibial	0.563814
GTEX-T2IS-1026-SM-32QP1	ArteryTibial	ArteryTibial	0.564988
GTEX-WOFM-1726-SM-3MJFA	ArteryTibial	ArteryTibial	0.565481
GTEX-13OW8-1626-SM-5L3HW	ArteryTibial	ArteryTibial	0.565637
GTEX-18D9B-0326-SM-731B2	ArteryTibial	ArteryTibial	0.566805
GTEX-16XZY-2426-SM-7EPGQ	ArteryTibial	ArteryTibial	0.56783
GTEX-ZTX8-1826-SM-5N9E5	ArteryTibial	ArteryTibial	0.568996
GTEX-139T6-1826-SM-5KM2E	ArteryTibial	ArteryTibial	0.569161
GTEX-1314G-1926-SM-5BC6F	ArteryTibial	ArteryTibial	0.571092
GTEX-S4Q7-1326-SM-4AD74	ArteryTibial	ArteryTibial	0.572732
GTEX-SIU8-0426-SM-4BRUE	ArteryTibial	ArteryTibial	0.573383
GTEX-18D9A-1626-SM-7LG5Q	ArteryTibial	ArteryTibial	0.574745
GTEX-145MH-1526-SM-5LUAU	ArteryTibial	ArteryTibial	0.575767
GTEX-QLQW-1526-SM-2S1QV	ArteryTibial	ArteryTibial	0.580193
GTEX-U412-0226-SM-3NMC8	ArteryTibial	ArteryTibial	0.580535
GTEX-13RTJ-2626-SM-7DHKR	ArteryTibial	ArteryTibial	0.584091
GTEX-R55E-0326-SM-48FD2	ArteryTibial	ArteryTibial	0.584836
GTEX-ZVTK-0726-SM-5GZX6	ArteryTibial	ArteryTibial	0.585723
GTEX-QLQ7-1926-SM-2S1R6	ArteryTibial	ArteryTibial	0.588067
GTEX-Y111-0426-SM-4TT3K	ArteryTibial	ArteryTibial	0.588523
GTEX-13RTK-1826-SM-5S2P3	ArteryTibial	ArteryTibial	0.604523
GTEX-TMMY-0626-SM-33HBD	ArteryTibial	ArteryTibial	0.611161
GTEX-SE5C-1026-SM-4BRUG	Bladder	Bladder	0.273317
GTEX-U3ZM-0826-SM-4DXU6	Bladder	Bladder	0.557144
GTEX-SNOS-0526-SM-4DM54	Bladder	Bladder	0.571567
GTEX-U3ZN-1226-SM-4DXUD	Bladder	Bladder	0.575309
GTEX-S4UY-0926-SM-4AD6O	Bladder	Bladder	0.582591
GTEX-S3XE-1226-SM-4AD4L	Bladder	Bladder	0.586311
GTEX-U4B1-1226-SM-4DXT7	Bladder	Bladder	0.591153
GTEX-SNMC-0826-SM-4DM66	Bladder	Bladder	0.626754
GTEX-S4Q7-0926-SM-4AD5D	Bladder	Bladder	0.628662
GTEX-S32W-1126-SM-4AD5V	Bladder	Bladder	0.638158
GTEX-TMMY-1526-SM-4DXST	Bladder	Bladder	0.691687
GTEX-12WSD-0011-R3b-SM-5LZWN	Brain_ACC	Brain_AnteriorCingulateCortex	0.208574
GTEX-QVUS-0011-R3A-SM-3GAFD	Brain_ACC	Brain_AnteriorCingulateCortex	0.230987
GTEX-T2IS-0011-R3A-SM-32QPB	Brain_ACC	Brain_AnteriorCingulateCortex	0.280304
GTEX-13PLJ-0011-R3a-SM-5O9DT	Brain_ACC	Brain_AnteriorCingulateCortex	0.33918
GTEX-148VJ-0011-R3b-SM-69LQJ	Brain_ACC	Brain_AnteriorCingulateCortex	0.363098
GTEX-N7MT-0011-R3a-SM-2I3GC	Brain_ACC	Brain_AnteriorCingulateCortex	0.383254
GTEX-XMD1-0011-R3B-SM-4AT5R	Brain_ACC	Brain_AnteriorCingulateCortex	0.383577
GTEX-OHPN-0011-R3A-SM-2I5FC	Brain_ACC	Brain_AnteriorCingulateCortex	0.388819
GTEX-WHSE-0011-R3A-SM-3P5ZM	Brain_ACC	Brain_AnteriorCingulateCortex	0.397789
GTEX-14LZ3-0011-R3a-SM-664NQ	Brain_ACC	Brain_AnteriorCingulateCortex	0.397868
GTEX-PWO3-0011-R3A-SM-2I5EX	Brain_ACC	Brain_AnteriorCingulateCortex	0.399044
GTEX-13RTJ-0011-R3a-SM-5PNX7	Brain_ACC	Brain_AnteriorCingulateCortex	0.40301
GTEX-1B8L1-0011-R3a-SM-7EPIO	Brain_ACC	Brain_AnteriorCingulateCortex	0.403188
GTEX-13IVO-0011-R3b-SM-5IJBJ	Brain_ACC	Brain_AnteriorCingulateCortex	0.405598
GTEX-11GSO-0011-R3b-SM-57WB2	Brain_ACC	Brain_AnteriorCingulateCortex	0.408177
GTEX-13X6K-0011-R3b-SM-5PNUD	Brain_ACC	Brain_AnteriorCingulateCortex	0.409766
GTEX-1313W-0011-R3a-SM-5EGLI	Brain_ACC	Brain_AnteriorCingulateCortex	0.417708
GTEX-14PJO-0011-R3a-SM-6AJBY	Brain_ACC	Brain_AnteriorCingulateCortex	0.417731
GTEX-12ZZZ-0011-R3b-SM-5DUXK	Brain_ACC	Brain_AnteriorCingulateCortex	0.422385
GTEX-RVPV-0011-R3A-SM-2TF63	Brain_ACC	Brain_AnteriorCingulateCortex	0.42354
GTEX-13CF2-0011-R3b-SM-5LZZ6	Brain_ACC	Brain_AnteriorCingulateCortex	0.425085
GTEX-145LS-0011-R3a-SM-5S2VJ	Brain_ACC	Brain_AnteriorCingulateCortex	0.42633
GTEX-145LU-0011-R3a-SM-5P9K2	Brain_ACC	Brain_AnteriorCingulateCortex	0.429064
GTEX-13O3O-0011-R3b-SM-5KM3R	Brain_ACC	Brain_AnteriorCingulateCortex	0.42976
GTEX-NPJ8-0011-R3a-SM-2HMIW	Brain_ACC	Brain_AnteriorCingulateCortex	0.432025
GTEX-13OVL-0011-R3b-SM-5L3I8	Brain_ACC	Brain_AnteriorCingulateCortex	0.433213
GTEX-13112-0011-R3b-SM-5HL9L	Brain_ACC	Brain_AnteriorCingulateCortex	0.434398
GTEX-13NYS-0011-R3b-SM-5MR41	Brain_ACC	Brain_AnteriorCingulateCortex	0.436884
GTEX-ZF28-0011-R3a-SM-4WWDA	Brain_ACC	Brain_AnteriorCingulateCortex	0.442058
GTEX-NL3H-0011-R3a-SM-2I3GL	Brain_ACC	Brain_AnteriorCingulateCortex	0.446571
GTEX-13N2G-0011-R3b-SM-5MR5G	Brain_ACC	Brain_AnteriorCingulateCortex	0.449801
GTEX-15ER7-0011-R3a-SM-6LPIK	Brain_ACC	Brain_AnteriorCingulateCortex	0.449841
GTEX-XLM4-0011-R3B-SM-4AT6E	Brain_ACC	Brain_AnteriorCingulateCortex	0.450552
GTEX-WL46-0011-R3A-SM-3TW8E	Brain_ACC	Brain_AnteriorCingulateCortex	0.451198
GTEX-145MH-0011-R3b-SM-5P9JQ	Brain_ACC	Brain_AnteriorCingulateCortex	0.451244
GTEX-13OW5-0011-R3a-SM-5L3I5	Brain_ACC	Brain_AnteriorCingulateCortex	0.454129
GTEX-13OVJ-0011-R3b-SM-5P9H6	Brain_ACC	Brain_AnteriorCingulateCortex	0.455192
GTEX-13FLV-0011-R3b-SM-5LZYP	Brain_ACC	Brain_AnteriorCingulateCortex	0.455675
GTEX-13CZV-0011-R3a-SM-5KM27	Brain_ACC	Brain_AnteriorCingulateCortex	0.455676
GTEX-13JVG-0011-R3b-SM-5LZXF	Brain_ACC	Brain_AnteriorCingulateCortex	0.455759
GTEX-14C39-0011-R3b-SM-5YYA3	Brain_ACC	Brain_AnteriorCingulateCortex	0.45587
GTEX-16XZZ-0011-R3a-SM-7IGLH	Brain_ACC	Brain_AnteriorCingulateCortex	0.458153
GTEX-13X6J-0011-R3b-SM-5P9K5	Brain_ACC	Brain_AnteriorCingulateCortex	0.458717
GTEX-12ZZX-0011-R3b-SM-5EGLH	Brain_ACC	Brain_AnteriorCingulateCortex	0.461709
GTEX-145MI-0011-R3b-SM-5PNWK	Brain_ACC	Brain_AnteriorCingulateCortex	0.46249
GTEX-15EO6-0011-R3b-SM-7KUDY	Brain_ACC	Brain_AnteriorCingulateCortex	0.462826
GTEX-14PN4-0011-R3b-SM-686ZU	Brain_ACC	Brain_AnteriorCingulateCortex	0.463473
GTEX-13RTL-0011-R3a-SM-5P9JP	Brain_ACC	Brain_AnteriorCingulateCortex	0.463747
GTEX-YFC4-0011-R3a-SM-4RGLP	Brain_ACC	Brain_AnteriorCingulateCortex	0.465415
GTEX-14LLW-0011-R3b-SM-62LFW	Brain_ACC	Brain_AnteriorCingulateCortex	0.466661
GTEX-13OW7-0011-R3a-SM-5O9DA	Brain_ACC	Brain_AnteriorCingulateCortex	0.467784
GTEX-14PQA-0011-R3b-SM-69LQO	Brain_ACC	Brain_AnteriorCingulateCortex	0.468679
GTEX-15SHU-0011-R3a-SM-7IGPS	Brain_ACC	Brain_AnteriorCingulateCortex	0.468712
GTEX-15G19-0011-R3a-SM-6LPIG	Brain_ACC	Brain_AnteriorCingulateCortex	0.470029
GTEX-17HII-0011-R3a-SM-7LT9D	Brain_ACC	Brain_AnteriorCingulateCortex	0.471124
GTEX-N7MS-0011-R3a-SM-33HC6	Brain_ACC	Brain_AnteriorCingulateCortex	0.471711
GTEX-13OVH-0011-R3a-SM-5KM49	Brain_ACC	Brain_AnteriorCingulateCortex	0.471948
GTEX-12ZZW-0011-R3a-SM-5DUWW	Brain_ACC	Brain_AnteriorCingulateCortex	0.472247
GTEX-1477Z-0011-R3b-SM-5PNX9	Brain_ACC	Brain_AnteriorCingulateCortex	0.472808
GTEX-QDT8-0011-R3A-SM-32PKR	Brain_ACC	Brain_AnteriorCingulateCortex	0.473599
GTEX-1445S-0011-R3a-SM-5P9HY	Brain_ACC	Brain_AnteriorCingulateCortex	0.474787
GTEX-X4XX-0011-R3B-SM-46MWK	Brain_ACC	Brain_AnteriorCingulateCortex	0.475596
GTEX-13CIG-0011-R3b-SM-5K7XF	Brain_ACC	Brain_AnteriorCingulateCortex	0.476185
GTEX-13PVQ-0011-R3b-SM-5O9D6	Brain_ACC	Brain_AnteriorCingulateCortex	0.477348
GTEX-11ZVC-0011-R3a-SM-5BC6V	Brain_ACC	Brain_AnteriorCingulateCortex	0.477996
GTEX-15DCD-0011-R3b-SM-6EU1I	Brain_ACC	Brain_AnteriorCingulateCortex	0.478424
GTEX-139T8-0011-R3b-SM-5HL4R	Brain_ACC	Brain_AnteriorCingulateCortex	0.478898
GTEX-18A6Q-0011-R3a-SM-718A7	Brain_ACC	Brain_AnteriorCingulateCortex	0.47957
GTEX-YJ89-0011-R3b-SM-4V6EF	Brain_ACC	Brain_AnteriorCingulateCortex	0.48069
GTEX-12WSM-0011-R3b-SM-5LZWI	Brain_ACC	Brain_AnteriorCingulateCortex	0.48088
GTEX-13FHO-0011-R3b-SM-5K7YA	Brain_ACC	Brain_AnteriorCingulateCortex	0.481225
GTEX-131XH-0011-R3b-SM-5DUWM	Brain_ACC	Brain_AnteriorCingulateCortex	0.481357
GTEX-13OW8-0011-R3a-SM-5L3I4	Brain_ACC	Brain_AnteriorCingulateCortex	0.483049
GTEX-16YQH-0011-R3a-SM-7EPGM	Brain_ACC	Brain_AnteriorCingulateCortex	0.483152
GTEX-17EVQ-0011-R3b-SM-7LT9B	Brain_ACC	Brain_AnteriorCingulateCortex	0.485676
GTEX-14BMV-0011-R3a-SM-5ZZU7	Brain_ACC	Brain_AnteriorCingulateCortex	0.48841
GTEX-11ZTS-0011-R3a-SM-5BC78	Brain_ACC	Brain_AnteriorCingulateCortex	0.488903
GTEX-Q2AG-0011-R3A-SM-2HMJ9	Brain_ACC	Brain_AnteriorCingulateCortex	0.489404
GTEX-13O3Q-0011-R3a-SM-5P9H3	Brain_ACC	Brain_AnteriorCingulateCortex	0.490052
GTEX-12WSC-0011-R3a-SM-5P9F1	Brain_ACC	Brain_AnteriorCingulateCortex	0.49397
GTEX-144GL-0011-R3a-SM-5P9HP	Brain_ACC	Brain_AnteriorCingulateCortex	0.49494
GTEX-ZVT3-0011-R3b-SM-51MTJ	Brain_ACC	Brain_AnteriorCingulateCortex	0.496394
GTEX-11UD1-0011-R3a-SM-5BC6S	Brain_ACC	Brain_AnteriorCingulateCortex	0.500918
GTEX-15DYW-0011-R3b-SM-6LPIM	Brain_ACC	Brain_AnteriorCingulateCortex	0.501696
GTEX-13X6I-0011-R3b-SM-5P9HM	Brain_ACC	Brain_AnteriorCingulateCortex	0.5024
GTEX-15CHQ-0011-R3b-SM-686ZY	Brain_ACC	Brain_AnteriorCingulateCortex	0.502503
GTEX-1A3MX-0011-R3b-SM-79OOW	Brain_ACC	Brain_AnteriorCingulateCortex	0.502823
[truncated: 9,690 more rows]
