# Supplementary material for: Integrated analysis of telomerase enzymatic activity unravels an association with cancer stemness and proliferation
Source: Nat Commun. 2021 Jan 8;12:139. doi: 10.1038/s41467-020-20474-9 (PMC7794223; doi:10.1038/s41467-020-20474-9)
Supplement: Supplementary file 7 — Supplementary Data 4 [file 41467_2020_20474_MOESM7_ESM.xlsx]

## Sheet: Supp. Data 4
Supplementary Data 4
SampleID	Cancer	Sample Code	Sample Type	EXTEND Scores
TCGA.OR.A5J1.01A.11R.A29S.07	ACC	01	tumor	0.435929
TCGA.OR.A5J2.01A.11R.A29S.07	ACC	01	tumor	0.319826
TCGA.OR.A5J3.01A.11R.A29S.07	ACC	01	tumor	0.318357
TCGA.OR.A5J5.01A.11R.A29S.07	ACC	01	tumor	0.493974
TCGA.OR.A5J6.01A.31R.A29S.07	ACC	01	tumor	0.214376
TCGA.OR.A5J7.01A.11R.A29S.07	ACC	01	tumor	0.52466
TCGA.OR.A5J8.01A.11R.A29S.07	ACC	01	tumor	0.290029
TCGA.OR.A5J9.01A.11R.A29S.07	ACC	01	tumor	0.466539
TCGA.OR.A5JA.01A.11R.A29S.07	ACC	01	tumor	0.355132
TCGA.OR.A5JB.01A.11R.A29S.07	ACC	01	tumor	0.415909
TCGA.OR.A5JC.01A.11R.A29S.07	ACC	01	tumor	0.40898
TCGA.OR.A5JD.01A.11R.A29S.07	ACC	01	tumor	0.232748
TCGA.OR.A5JE.01A.11R.A29S.07	ACC	01	tumor	0.502201
TCGA.OR.A5JF.01A.11R.A29S.07	ACC	01	tumor	0.214388
TCGA.OR.A5JG.01A.11R.A29S.07	ACC	01	tumor	0.563829
TCGA.OR.A5JI.01A.11R.A29S.07	ACC	01	tumor	0.174603
TCGA.OR.A5JJ.01A.11R.A29S.07	ACC	01	tumor	0.400896
TCGA.OR.A5JK.01A.11R.A29S.07	ACC	01	tumor	0.263393
TCGA.OR.A5JL.01A.11R.A29S.07	ACC	01	tumor	0.193434
TCGA.OR.A5JM.01A.11R.A29S.07	ACC	01	tumor	0.540124
TCGA.OR.A5JO.01A.11R.A29S.07	ACC	01	tumor	0.250228
TCGA.OR.A5JP.01A.11R.A29S.07	ACC	01	tumor	0.560116
TCGA.OR.A5JQ.01A.11R.A29S.07	ACC	01	tumor	0.215066
TCGA.OR.A5JR.01A.11R.A29S.07	ACC	01	tumor	0.274918
TCGA.OR.A5JS.01A.11R.A29S.07	ACC	01	tumor	0.642863
TCGA.OR.A5JT.01A.11R.A29S.07	ACC	01	tumor	0.391017
TCGA.OR.A5JV.01A.11R.A29S.07	ACC	01	tumor	0.320482
TCGA.OR.A5JW.01A.11R.A29S.07	ACC	01	tumor	0.326715
TCGA.OR.A5JX.01A.11R.A29S.07	ACC	01	tumor	0.314815
TCGA.OR.A5JY.01A.31R.A29S.07	ACC	01	tumor	0.356024
TCGA.OR.A5JZ.01A.11R.A29S.07	ACC	01	tumor	0.541772
TCGA.OR.A5K0.01A.11R.A29S.07	ACC	01	tumor	0.358696
TCGA.OR.A5K1.01A.11R.A29S.07	ACC	01	tumor	0.516657
TCGA.OR.A5K2.01A.11R.A29S.07	ACC	01	tumor	0.527009
TCGA.OR.A5K3.01A.11R.A29S.07	ACC	01	tumor	0.369093
TCGA.OR.A5K4.01A.11R.A29S.07	ACC	01	tumor	0.311998
TCGA.OR.A5K5.01A.11R.A29S.07	ACC	01	tumor	0.433943
TCGA.OR.A5K6.01A.11R.A29S.07	ACC	01	tumor	0.309668
TCGA.OR.A5K8.01A.11R.A29S.07	ACC	01	tumor	0.277916
TCGA.OR.A5K9.01A.11R.A29S.07	ACC	01	tumor	0.525965
TCGA.OR.A5KO.01A.11R.A29S.07	ACC	01	tumor	0.407905
TCGA.OR.A5KT.01A.11R.A29S.07	ACC	01	tumor	0.208692
TCGA.OR.A5KU.01A.11R.A29S.07	ACC	01	tumor	0.260378
TCGA.OR.A5KV.01A.11R.A29S.07	ACC	01	tumor	0.575629
TCGA.OR.A5KW.01A.11R.A29S.07	ACC	01	tumor	0.442354
TCGA.OR.A5KX.01A.11R.A29S.07	ACC	01	tumor	0.760785
TCGA.OR.A5KY.01A.11R.A29S.07	ACC	01	tumor	0.446195
TCGA.OR.A5KZ.01A.11R.A29S.07	ACC	01	tumor	0.596059
TCGA.OR.A5L3.01A.11R.A29S.07	ACC	01	tumor	0.204955
TCGA.OR.A5L4.01A.11R.A29S.07	ACC	01	tumor	0.401923
TCGA.OR.A5L5.01A.11R.A29S.07	ACC	01	tumor	0.15587
TCGA.OR.A5L6.01A.11R.A29S.07	ACC	01	tumor	0.511797
TCGA.OR.A5L8.01A.11R.A29S.07	ACC	01	tumor	0.357576
TCGA.OR.A5L9.01A.11R.A29S.07	ACC	01	tumor	0.202457
TCGA.OR.A5LA.01A.11R.A29S.07	ACC	01	tumor	0.160893
TCGA.OR.A5LB.01A.11R.A29S.07	ACC	01	tumor	0.292786
TCGA.OR.A5LC.01A.11R.A29S.07	ACC	01	tumor	0.530917
TCGA.OR.A5LD.01A.11R.A29S.07	ACC	01	tumor	0.54718
TCGA.OR.A5LE.01A.11R.A29S.07	ACC	01	tumor	0.527853
TCGA.OR.A5LG.01A.11R.A29S.07	ACC	01	tumor	0.524182
TCGA.OR.A5LH.01A.11R.A29S.07	ACC	01	tumor	0.128598
TCGA.OR.A5LJ.01A.11R.A29S.07	ACC	01	tumor	0.34162
TCGA.OR.A5LK.01A.11R.A29S.07	ACC	01	tumor	0.261503
TCGA.OR.A5LL.01A.11R.A29S.07	ACC	01	tumor	0.346245
TCGA.OR.A5LM.01A.11R.A29S.07	ACC	01	tumor	0.352931
TCGA.OR.A5LN.01A.11R.A29S.07	ACC	01	tumor	0.172487
TCGA.OR.A5LO.01A.11R.A29S.07	ACC	01	tumor	0.43371
TCGA.OR.A5LP.01A.11R.A29S.07	ACC	01	tumor	0.192092
TCGA.OR.A5LR.01A.11R.A29S.07	ACC	01	tumor	0.252723
TCGA.OR.A5LS.01A.11R.A29S.07	ACC	01	tumor	0.335109
TCGA.OR.A5LT.01A.11R.A29S.07	ACC	01	tumor	0.697108
TCGA.OU.A5PI.01A.12R.A29S.07	ACC	01	tumor	0.286428
TCGA.P6.A5OF.01A.11R.A29S.07	ACC	01	tumor	0.330828
TCGA.PA.A5YG.01A.11R.A29S.07	ACC	01	tumor	0.197601
TCGA.PK.A5H8.01A.11R.A29S.07	ACC	01	tumor	0.80223
TCGA.PK.A5H9.01A.11R.A29S.07	ACC	01	tumor	0.276753
TCGA.PK.A5HA.01A.11R.A29S.07	ACC	01	tumor	0.313344
TCGA.PK.A5HB.01A.11R.A29S.07	ACC	01	tumor	0.38135
TCGA.BL.A13J.11A.13R.A10U.07	BLCA	11	normal	0.193532
TCGA.BT.A20N.11A.11R.A14Y.07	BLCA	11	normal	0.208625
TCGA.BT.A20Q.11A.11R.A14Y.07	BLCA	11	normal	0.214587
TCGA.BT.A20R.11A.11R.A16R.07	BLCA	11	normal	0.179509
TCGA.BT.A20U.11A.11R.A14Y.07	BLCA	11	normal	0.442993
TCGA.BT.A20W.11A.11R.A14Y.07	BLCA	11	normal	0.311959
TCGA.BT.A2LA.11A.11R.A18C.07	BLCA	11	normal	0.322747
TCGA.BT.A2LB.11A.11R.A18C.07	BLCA	11	normal	0.323971
TCGA.CU.A0YN.11A.11R.A10U.07	BLCA	11	normal	0.444396
TCGA.CU.A0YR.11A.13R.A10U.07	BLCA	11	normal	0.281328
TCGA.GC.A3BM.11A.11R.A22U.07	BLCA	11	normal	0.312146
TCGA.GC.A3WC.11A.11R.A22U.07	BLCA	11	normal	0.291705
TCGA.GC.A6I3.11A.11R.A31N.07	BLCA	11	normal	0.471121
TCGA.GD.A2C5.11A.11R.A180.07	BLCA	11	normal	0.295066
TCGA.GD.A3OP.11A.11R.A220.07	BLCA	11	normal	0.229569
TCGA.GD.A3OQ.11A.21R.A220.07	BLCA	11	normal	0.207177
TCGA.K4.A3WV.11A.21R.A22U.07	BLCA	11	normal	0.234104
TCGA.K4.A54R.11A.11R.A26T.07	BLCA	11	normal	0.144868
TCGA.K4.A5RI.11A.11R.A28M.07	BLCA	11	normal	0.299138
TCGA.2F.A9KO.01A.11R.A38B.07	BLCA	01	tumor	0.543619
TCGA.2F.A9KP.01A.11R.A38B.07	BLCA	01	tumor	0.637425
TCGA.2F.A9KQ.01A.11R.A38B.07	BLCA	01	tumor	0.515426
TCGA.2F.A9KR.01A.11R.A38B.07	BLCA	01	tumor	0.424029
TCGA.2F.A9KT.01A.11R.A38B.07	BLCA	01	tumor	0.601104
TCGA.2F.A9KW.01A.11R.A38B.07	BLCA	01	tumor	0.739244
TCGA.4Z.AA7M.01A.11R.A39I.07	BLCA	01	tumor	0.712093
TCGA.4Z.AA7N.01A.11R.A39I.07	BLCA	01	tumor	0.330679
TCGA.4Z.AA7O.01A.31R.A39I.07	BLCA	01	tumor	0.544825
TCGA.4Z.AA7Q.01A.11R.A39I.07	BLCA	01	tumor	0.521648
TCGA.4Z.AA7R.01A.11R.A39I.07	BLCA	01	tumor	0.60618
TCGA.4Z.AA7S.01A.11R.A39I.07	BLCA	01	tumor	0.57235
TCGA.4Z.AA7W.01A.11R.A39I.07	BLCA	01	tumor	0.53739
TCGA.4Z.AA7Y.01A.11R.A39I.07	BLCA	01	tumor	0.561388
TCGA.4Z.AA80.01A.11R.A39I.07	BLCA	01	tumor	0.710176
TCGA.4Z.AA81.01A.11R.A39I.07	BLCA	01	tumor	0.621937
TCGA.4Z.AA82.01A.11R.A39I.07	BLCA	01	tumor	0.484574
TCGA.4Z.AA83.01A.11R.A39I.07	BLCA	01	tumor	0.431248
TCGA.4Z.AA84.01A.11R.A39I.07	BLCA	01	tumor	0.669322
TCGA.4Z.AA86.01A.11R.A39I.07	BLCA	01	tumor	0.67231
TCGA.4Z.AA87.01A.11R.A39I.07	BLCA	01	tumor	0.722089
TCGA.4Z.AA89.01A.11R.A39I.07	BLCA	01	tumor	0.51961
TCGA.5N.A9KI.01A.31R.A42T.07	BLCA	01	tumor	0.355307
TCGA.5N.A9KM.01A.11R.A42T.07	BLCA	01	tumor	0.413352
TCGA.BL.A13I.01A.11R.A13Y.07	BLCA	01	tumor	0.567226
TCGA.BL.A13J.01A.11R.A10U.07	BLCA	01	tumor	0.502819
TCGA.BL.A3JM.01A.12R.A21D.07	BLCA	01	tumor	0.645202
TCGA.BL.A5ZZ.01A.31R.A30C.07	BLCA	01	tumor	0.383633
TCGA.BT.A0S7.01A.11R.A10U.07	BLCA	01	tumor	0.571958
TCGA.BT.A0YX.01A.11R.A10U.07	BLCA	01	tumor	0.513735
TCGA.BT.A20J.01A.11R.A14Y.07	BLCA	01	tumor	0.526134
TCGA.BT.A20N.01A.11R.A14Y.07	BLCA	01	tumor	0.605855
TCGA.BT.A20O.01A.21R.A14Y.07	BLCA	01	tumor	0.551955
TCGA.BT.A20P.01A.11R.A14Y.07	BLCA	01	tumor	0.553224
TCGA.BT.A20Q.01A.11R.A14Y.07	BLCA	01	tumor	0.382895
TCGA.BT.A20R.01A.12R.A16R.07	BLCA	01	tumor	0.380833
TCGA.BT.A20T.01A.11R.A14Y.07	BLCA	01	tumor	0.45834
TCGA.BT.A20U.01A.11R.A14Y.07	BLCA	01	tumor	0.57705
TCGA.BT.A20V.01A.11R.A14Y.07	BLCA	01	tumor	0.678345
TCGA.BT.A20W.01A.21R.A14Y.07	BLCA	01	tumor	0.481516
TCGA.BT.A20X.01A.11R.A16R.07	BLCA	01	tumor	0.391456
TCGA.BT.A2LA.01A.11R.A18C.07	BLCA	01	tumor	0.691308
TCGA.BT.A2LB.01A.11R.A18C.07	BLCA	01	tumor	0.539657
TCGA.BT.A2LD.01A.12R.A20F.07	BLCA	01	tumor	0.484139
TCGA.BT.A3PH.01A.11R.A220.07	BLCA	01	tumor	0.496229
TCGA.BT.A3PJ.01A.21R.A220.07	BLCA	01	tumor	0.635103
TCGA.BT.A3PK.01A.21R.A220.07	BLCA	01	tumor	0.44222
TCGA.BT.A42C.01A.11R.A23N.07	BLCA	01	tumor	0.565996
TCGA.BT.A42E.01A.11R.A23W.07	BLCA	01	tumor	0.56822
TCGA.BT.A42F.01A.11R.A23W.07	BLCA	01	tumor	0.594191
TCGA.C4.A0EZ.01A.21R.A24X.07	BLCA	01	tumor	0.804739
TCGA.C4.A0F0.01A.12R.A10U.07	BLCA	01	tumor	0.560784
TCGA.C4.A0F1.01A.11R.A034.07	BLCA	01	tumor	0.496526
TCGA.C4.A0F6.01A.11R.A10U.07	BLCA	01	tumor	0.459525
TCGA.C4.A0F7.01A.11R.A084.07	BLCA	01	tumor	0.549023
TCGA.CF.A1HR.01A.11R.A13Y.07	BLCA	01	tumor	0.50471
TCGA.CF.A1HS.01A.11R.A13Y.07	BLCA	01	tumor	0.575927
TCGA.CF.A27C.01A.11R.A16R.07	BLCA	01	tumor	0.546122
TCGA.CF.A3MF.01A.12R.A21D.07	BLCA	01	tumor	0.785295
TCGA.CF.A3MG.01A.11R.A20F.07	BLCA	01	tumor	0.608486
TCGA.CF.A3MH.01A.11R.A20F.07	BLCA	01	tumor	0.529225
TCGA.CF.A3MI.01A.11R.A20F.07	BLCA	01	tumor	0.424726
TCGA.CF.A47S.01A.11R.A23W.07	BLCA	01	tumor	0.374853
TCGA.CF.A47T.01A.11R.A23W.07	BLCA	01	tumor	0.550286
TCGA.CF.A47V.01A.11R.A23W.07	BLCA	01	tumor	0.472604
TCGA.CF.A47W.01A.11R.A23W.07	BLCA	01	tumor	0.411567
TCGA.CF.A47X.01A.31R.A23W.07	BLCA	01	tumor	0.473613
TCGA.CF.A47Y.01A.11R.A23W.07	BLCA	01	tumor	0.403066
TCGA.CF.A5U8.01A.11R.A28M.07	BLCA	01	tumor	0.412779
TCGA.CF.A5UA.01A.11R.A28M.07	BLCA	01	tumor	0.426739
TCGA.CF.A7I0.01A.22R.A352.07	BLCA	01	tumor	0.401057
TCGA.CF.A8HX.01A.11R.A36F.07	BLCA	01	tumor	0.643499
TCGA.CF.A8HY.01A.11R.A36F.07	BLCA	01	tumor	0.391565
TCGA.CF.A9FF.01A.11R.A38B.07	BLCA	01	tumor	0.508272
TCGA.CF.A9FH.01A.11R.A38B.07	BLCA	01	tumor	0.549646
TCGA.CF.A9FL.01A.11R.A38B.07	BLCA	01	tumor	0.434989
TCGA.CU.A0YN.01A.21R.A10U.07	BLCA	01	tumor	0.590887
TCGA.CU.A0YO.01A.11R.A10U.07	BLCA	01	tumor	0.384132
TCGA.CU.A0YR.01A.12R.A10U.07	BLCA	01	tumor	0.44578
TCGA.CU.A3KJ.01A.11R.A21D.07	BLCA	01	tumor	0.482956
TCGA.CU.A3QU.01A.11R.A22U.07	BLCA	01	tumor	0.61929
TCGA.CU.A3YL.01A.11R.A22U.07	BLCA	01	tumor	0.419037
TCGA.CU.A5W6.01A.11R.A28M.07	BLCA	01	tumor	0.43175
TCGA.CU.A72E.01A.12R.A33J.07	BLCA	01	tumor	0.486655
TCGA.DK.A1A3.01A.11R.A13Y.07	BLCA	01	tumor	0.45916
TCGA.DK.A1A5.01A.11R.A13Y.07	BLCA	01	tumor	0.479858
TCGA.DK.A1A6.01A.11R.A13Y.07	BLCA	01	tumor	0.598536
TCGA.DK.A1A7.01A.11R.A13Y.07	BLCA	01	tumor	0.514731
TCGA.DK.A1AA.01A.11R.A13Y.07	BLCA	01	tumor	0.444822
TCGA.DK.A1AB.01A.11R.A13Y.07	BLCA	01	tumor	0.352426
TCGA.DK.A1AC.01A.11R.A13Y.07	BLCA	01	tumor	0.615841
TCGA.DK.A1AD.01A.11R.A13Y.07	BLCA	01	tumor	0.633398
TCGA.DK.A1AE.01A.11R.A13Y.07	BLCA	01	tumor	0.637457
TCGA.DK.A1AF.01A.11R.A13Y.07	BLCA	01	tumor	0.310294
TCGA.DK.A1AG.01A.11R.A13Y.07	BLCA	01	tumor	0.502289
TCGA.DK.A2HX.01A.12R.A18C.07	BLCA	01	tumor	0.329604
TCGA.DK.A2I1.01A.11R.A180.07	BLCA	01	tumor	0.395497
TCGA.DK.A2I2.01A.11R.A180.07	BLCA	01	tumor	0.501091
TCGA.DK.A2I4.01A.11R.A21D.07	BLCA	01	tumor	0.458257
TCGA.DK.A2I6.01A.12R.A18C.07	BLCA	01	tumor	0.694652
TCGA.DK.A3IK.01A.32R.A21D.07	BLCA	01	tumor	0.369433
TCGA.DK.A3IL.01A.11R.A20F.07	BLCA	01	tumor	0.525671
TCGA.DK.A3IM.01A.11R.A20F.07	BLCA	01	tumor	0.598275
TCGA.DK.A3IN.01A.11R.A20F.07	BLCA	01	tumor	0.539537
TCGA.DK.A3IQ.01A.31R.A32Y.07	BLCA	01	tumor	0.249016
TCGA.DK.A3IS.01A.21R.A21D.07	BLCA	01	tumor	0.606859
TCGA.DK.A3IT.01A.31R.A20F.07	BLCA	01	tumor	0.693519
TCGA.DK.A3IU.01A.11R.A20F.07	BLCA	01	tumor	0.453685
TCGA.DK.A3IV.01A.22R.A21D.07	BLCA	01	tumor	0.650439
TCGA.DK.A3WW.01A.22R.A23N.07	BLCA	01	tumor	0.544435
TCGA.DK.A3WX.01A.22R.A22U.07	BLCA	01	tumor	0.672655
TCGA.DK.A3WY.01A.11R.A22U.07	BLCA	01	tumor	0.607462
TCGA.DK.A3X1.01A.12R.A22U.07	BLCA	01	tumor	0.577411
TCGA.DK.A3X2.01A.11R.A22U.07	BLCA	01	tumor	0.637292
TCGA.DK.A6AV.01A.12R.A30C.07	BLCA	01	tumor	0.549223
TCGA.DK.A6AW.01A.11R.A30C.07	BLCA	01	tumor	0.38197
TCGA.DK.A6B0.01A.11R.A31N.07	BLCA	01	tumor	0.430843
TCGA.DK.A6B1.01A.12R.A30C.07	BLCA	01	tumor	0.516094
TCGA.DK.A6B5.01A.11R.A31N.07	BLCA	01	tumor	0.559397
TCGA.DK.A6B6.01A.11R.A30C.07	BLCA	01	tumor	0.470035
TCGA.DK.AA6L.01A.11R.A39I.07	BLCA	01	tumor	0.591498
TCGA.DK.AA6M.01A.11R.A39I.07	BLCA	01	tumor	0.440767
TCGA.DK.AA6P.01A.11R.A39I.07	BLCA	01	tumor	0.51067
TCGA.DK.AA6Q.01A.11R.A39I.07	BLCA	01	tumor	0.622184
TCGA.DK.AA6R.01A.11R.A42T.07	BLCA	01	tumor	0.601369
TCGA.DK.AA6S.01A.21R.A39I.07	BLCA	01	tumor	0.408516
TCGA.DK.AA6T.01A.11R.A39I.07	BLCA	01	tumor	0.749312
TCGA.DK.AA6U.01A.11R.A39I.07	BLCA	01	tumor	0.598192
TCGA.DK.AA6W.01A.12R.A39I.07	BLCA	01	tumor	0.818791
TCGA.DK.AA6X.01A.12R.A42T.07	BLCA	01	tumor	0.480313
TCGA.DK.AA71.01A.31R.A39I.07	BLCA	01	tumor	0.489615
TCGA.DK.AA74.01A.11R.A39I.07	BLCA	01	tumor	0.41247
TCGA.DK.AA75.01A.11R.A39I.07	BLCA	01	tumor	0.696346
TCGA.DK.AA76.01A.11R.A39I.07	BLCA	01	tumor	0.460943
TCGA.DK.AA77.01A.11R.A39I.07	BLCA	01	tumor	0.609592
TCGA.E5.A2PC.01A.11R.A206.07	BLCA	01	tumor	0.574243
TCGA.E5.A4TZ.01A.11R.A31N.07	BLCA	01	tumor	0.643617
TCGA.E5.A4U1.01A.11R.A31N.07	BLCA	01	tumor	0.92605
TCGA.E7.A3X6.01A.12R.A22U.07	BLCA	01	tumor	0.446755
TCGA.E7.A3Y1.01A.11R.A22U.07	BLCA	01	tumor	0.485327
TCGA.E7.A4IJ.01A.31R.A26T.07	BLCA	01	tumor	0.546214
TCGA.E7.A4XJ.01A.11R.A26T.07	BLCA	01	tumor	0.458182
TCGA.E7.A519.01A.11R.A26T.07	BLCA	01	tumor	0.361579
TCGA.E7.A541.01A.11R.A26T.07	BLCA	01	tumor	0.611672
TCGA.E7.A5KE.01A.11R.A28M.07	BLCA	01	tumor	0.640796
TCGA.E7.A5KF.01A.11R.A28M.07	BLCA	01	tumor	0.554966
TCGA.E7.A677.01A.11R.A30C.07	BLCA	01	tumor	0.468087
TCGA.E7.A678.01A.11R.A30C.07	BLCA	01	tumor	0.42827
TCGA.E7.A6MD.01A.41R.A352.07	BLCA	01	tumor	0.431431
TCGA.E7.A6ME.01A.22R.A32O.07	BLCA	01	tumor	0.568403
TCGA.E7.A6MF.01A.12R.A32O.07	BLCA	01	tumor	0.31695
TCGA.E7.A7DU.01A.11R.A32O.07	BLCA	01	tumor	0.477176
TCGA.E7.A7DV.01A.11R.A33J.07	BLCA	01	tumor	0.525139
TCGA.E7.A7PW.01A.11R.A352.07	BLCA	01	tumor	0.480377
TCGA.E7.A7XN.01A.11R.A352.07	BLCA	01	tumor	0.528808
TCGA.E7.A85H.01A.11R.A352.07	BLCA	01	tumor	0.511313
TCGA.E7.A8O7.01A.11R.A36F.07	BLCA	01	tumor	0.372755
TCGA.E7.A8O8.01A.11R.A36F.07	BLCA	01	tumor	0.490757
TCGA.E7.A97P.01A.11R.A38B.07	BLCA	01	tumor	0.477789
TCGA.E7.A97Q.01A.11R.A38B.07	BLCA	01	tumor	0.47231
TCGA.FD.A3B3.01A.12R.A206.07	BLCA	01	tumor	0.586132
TCGA.FD.A3B4.01A.12R.A206.07	BLCA	01	tumor	0.524634
TCGA.FD.A3B5.01A.11R.A20F.07	BLCA	01	tumor	0.515031
TCGA.FD.A3B6.01A.21R.A20F.07	BLCA	01	tumor	0.554114
TCGA.FD.A3B7.01A.31R.A20F.07	BLCA	01	tumor	0.45679
TCGA.FD.A3B8.01A.31R.A20F.07	BLCA	01	tumor	0.394191
TCGA.FD.A3N5.01A.11R.A21D.07	BLCA	01	tumor	0.567873
TCGA.FD.A3N6.01A.11R.A21D.07	BLCA	01	tumor	0.548057
TCGA.FD.A3NA.01A.11R.A21D.07	BLCA	01	tumor	0.514237
TCGA.FD.A3SJ.01A.12R.A22U.07	BLCA	01	tumor	0.590431
TCGA.FD.A3SL.01A.21R.A22U.07	BLCA	01	tumor	0.447755
TCGA.FD.A3SM.01A.11R.A22U.07	BLCA	01	tumor	0.446264
TCGA.FD.A3SN.01A.12R.A22U.07	BLCA	01	tumor	0.66021
TCGA.FD.A3SO.01A.11R.A22U.07	BLCA	01	tumor	0.681755
TCGA.FD.A3SP.01A.31R.A22U.07	BLCA	01	tumor	0.407994
TCGA.FD.A3SQ.01A.21R.A22U.07	BLCA	01	tumor	0.312349
TCGA.FD.A3SR.01A.11R.A22U.07	BLCA	01	tumor	0.475793
TCGA.FD.A3SS.01A.12R.A22U.07	BLCA	01	tumor	0.50329
TCGA.FD.A43N.01A.11R.A23W.07	BLCA	01	tumor	0.489124
TCGA.FD.A43P.01A.31R.A23W.07	BLCA	01	tumor	0.586448
TCGA.FD.A43S.01A.21R.A23W.07	BLCA	01	tumor	0.269527
TCGA.FD.A43U.01A.11R.A23W.07	BLCA	01	tumor	0.41604
TCGA.FD.A43X.01A.11R.A23W.07	BLCA	01	tumor	0.448095
TCGA.FD.A43Y.01A.21R.A26T.07	BLCA	01	tumor	0.54213
TCGA.FD.A5BR.01A.11R.A26T.07	BLCA	01	tumor	0.484891
TCGA.FD.A5BS.01A.21R.A26T.07	BLCA	01	tumor	0.584062
TCGA.FD.A5BT.01A.11R.A26T.07	BLCA	01	tumor	0.372113
TCGA.FD.A5BU.01A.31R.A26T.07	BLCA	01	tumor	0.431806
TCGA.FD.A5BV.01A.11R.A26T.07	BLCA	01	tumor	0.538638
TCGA.FD.A5BX.01A.11R.A26T.07	BLCA	01	tumor	0.451467
TCGA.FD.A5BY.01A.31R.A28M.07	BLCA	01	tumor	0.634201
TCGA.FD.A5BZ.01A.11R.A28M.07	BLCA	01	tumor	0.367508
TCGA.FD.A5C0.01A.11R.A28M.07	BLCA	01	tumor	0.534475
TCGA.FD.A5C1.01A.11R.A28M.07	BLCA	01	tumor	0.434118
TCGA.FD.A62N.01A.11R.A30C.07	BLCA	01	tumor	0.498521
TCGA.FD.A62O.01A.11R.A30C.07	BLCA	01	tumor	0.604182
TCGA.FD.A62P.01A.32R.A30C.07	BLCA	01	tumor	0.537321
TCGA.FD.A62S.01A.11R.A30C.07	BLCA	01	tumor	0.47484
TCGA.FD.A6TA.01A.12R.A33J.07	BLCA	01	tumor	0.422919
TCGA.FD.A6TB.01A.12R.A33J.07	BLCA	01	tumor	0.556041
TCGA.FD.A6TC.01A.21R.A33J.07	BLCA	01	tumor	0.529821
TCGA.FD.A6TD.01A.51R.A33J.07	BLCA	01	tumor	0.482477
TCGA.FD.A6TE.01A.12R.A33J.07	BLCA	01	tumor	0.615703
TCGA.FD.A6TF.01A.52R.A32O.07	BLCA	01	tumor	0.486402
TCGA.FD.A6TG.01A.11R.A32O.07	BLCA	01	tumor	0.460503
TCGA.FD.A6TH.01A.11R.A32O.07	BLCA	01	tumor	0.749408
TCGA.FD.A6TI.01A.11R.A32O.07	BLCA	01	tumor	0.304298
TCGA.FD.A6TK.01A.42R.A33J.07	BLCA	01	tumor	0.480922
TCGA.FJ.A3Z7.01A.12R.A23N.07	BLCA	01	tumor	0.427997
TCGA.FJ.A3Z9.01A.11R.A26T.07	BLCA	01	tumor	0.587233
TCGA.FJ.A3ZE.01A.11R.A23N.07	BLCA	01	tumor	0.554588
TCGA.FJ.A3ZF.01A.11R.A23N.07	BLCA	01	tumor	0.66684
TCGA.FJ.A871.01A.11R.A352.07	BLCA	01	tumor	0.556876
TCGA.FT.A3EE.01A.11R.A206.07	BLCA	01	tumor	0.546807
TCGA.FT.A61P.01A.11R.A30C.07	BLCA	01	tumor	0.451325
TCGA.G2.A2EC.01A.11R.A180.07	BLCA	01	tumor	0.331989
TCGA.G2.A2EF.01A.12R.A18C.07	BLCA	01	tumor	0.525863
TCGA.G2.A2EJ.01A.11R.A180.07	BLCA	01	tumor	0.538005
TCGA.G2.A2EK.01A.22R.A18C.07	BLCA	01	tumor	0.387743
TCGA.G2.A2EL.01A.12R.A18C.07	BLCA	01	tumor	0.927684
TCGA.G2.A2EO.01A.11R.A180.07	BLCA	01	tumor	0.520087
TCGA.G2.A2ES.01A.11R.A180.07	BLCA	01	tumor	0.599679
TCGA.G2.A3IB.01A.11R.A20F.07	BLCA	01	tumor	0.643368
TCGA.G2.A3IE.01A.11R.A20F.07	BLCA	01	tumor	0.452349
TCGA.G2.A3VY.01A.11R.A22U.07	BLCA	01	tumor	0.451953
TCGA.G2.AA3B.01A.11R.A39I.07	BLCA	01	tumor	0.679797
TCGA.G2.AA3C.01A.21R.A39I.07	BLCA	01	tumor	0.595367
TCGA.G2.AA3D.01A.11R.A39I.07	BLCA	01	tumor	0.358301
TCGA.G2.AA3F.01A.12R.A42T.07	BLCA	01	tumor	0.578727
TCGA.GC.A3BM.01A.11R.A22U.07	BLCA	01	tumor	0.59335
TCGA.GC.A3I6.01A.11R.A20F.07	BLCA	01	tumor	0.609987
TCGA.GC.A3OO.01A.11R.A22U.07	BLCA	01	tumor	0.54014
TCGA.GC.A3RB.01A.12R.A220.07	BLCA	01	tumor	0.638345
TCGA.GC.A3RC.01A.11R.A22U.07	BLCA	01	tumor	0.513715
TCGA.GC.A3RD.01A.12R.A22U.07	BLCA	01	tumor	0.322316
TCGA.GC.A3WC.01A.31R.A22U.07	BLCA	01	tumor	0.536094
TCGA.GC.A3YS.01A.11R.A23N.07	BLCA	01	tumor	0.578709
TCGA.GC.A4ZW.01A.11R.A26T.07	BLCA	01	tumor	0.619912
TCGA.GC.A6I1.01A.12R.A31N.07	BLCA	01	tumor	0.548365
TCGA.GC.A6I3.01A.11R.A31N.07	BLCA	01	tumor	0.508316
TCGA.GD.A2C5.01A.12R.A180.07	BLCA	01	tumor	0.50638
TCGA.GD.A3OP.01A.21R.A220.07	BLCA	01	tumor	0.327485
TCGA.GD.A3OQ.01A.32R.A220.07	BLCA	01	tumor	0.554092
TCGA.GD.A3OS.01A.12R.A220.07	BLCA	01	tumor	0.447583
TCGA.GD.A6C6.01A.21R.A31N.07	BLCA	01	tumor	0.593739
TCGA.GD.A76B.01A.11R.A32O.07	BLCA	01	tumor	0.406173
TCGA.GU.A42P.01A.11R.A23W.07	BLCA	01	tumor	0.644452
TCGA.GU.A42Q.01A.11R.A23W.07	BLCA	01	tumor	0.655732
TCGA.GU.A42R.01A.11R.A23N.07	BLCA	01	tumor	0.513677
TCGA.GU.A762.01A.11R.A33J.07	BLCA	01	tumor	0.416568
TCGA.GU.A763.01A.11R.A32O.07	BLCA	01	tumor	0.610444
TCGA.GU.A764.01A.11R.A352.07	BLCA	01	tumor	0.460793
TCGA.GU.A766.01A.11R.A32O.07	BLCA	01	tumor	0.516372
TCGA.GU.A767.01A.11R.A32O.07	BLCA	01	tumor	0.425569
TCGA.GU.AATO.01A.11R.A39I.07	BLCA	01	tumor	0.66666
TCGA.GU.AATP.01A.11R.A39I.07	BLCA	01	tumor	0.432588
TCGA.GU.AATQ.01A.11R.A39I.07	BLCA	01	tumor	0.556879
TCGA.GV.A3JV.01A.11R.A220.07	BLCA	01	tumor	0.498959
TCGA.GV.A3JW.01A.11R.A20F.07	BLCA	01	tumor	0.453427
TCGA.GV.A3JX.01A.11R.A20F.07	BLCA	01	tumor	0.47272
TCGA.GV.A3JZ.01A.11R.A21D.07	BLCA	01	tumor	0.763877
TCGA.GV.A3QF.01A.31R.A22U.07	BLCA	01	tumor	0.604097
TCGA.GV.A3QG.01A.11R.A220.07	BLCA	01	tumor	0.478638
TCGA.GV.A3QH.01A.11R.A220.07	BLCA	01	tumor	0.515541
TCGA.GV.A3QI.01A.11R.A220.07	BLCA	01	tumor	0.669088
TCGA.GV.A3QK.01B.11R.A23N.07	BLCA	01	tumor	0.520546
TCGA.GV.A40E.01A.12R.A23N.07	BLCA	01	tumor	0.634152
TCGA.GV.A40G.01A.11R.A23N.07	BLCA	01	tumor	0.560472
TCGA.GV.A6ZA.01A.12R.A33J.07	BLCA	01	tumor	0.699032
TCGA.H4.A2HO.01A.11R.A180.07	BLCA	01	tumor	0.388712
TCGA.H4.A2HQ.01A.11R.A180.07	BLCA	01	tumor	0.609455
TCGA.HQ.A2OE.01A.11R.A206.07	BLCA	01	tumor	0.614891
TCGA.HQ.A5ND.01A.11R.A26T.07	BLCA	01	tumor	0.735147
TCGA.HQ.A5NE.01A.12R.A28M.07	BLCA	01	tumor	0.497925
TCGA.K4.A3WS.01A.11R.A22U.07	BLCA	01	tumor	0.453885
TCGA.K4.A3WU.01B.11R.A23N.07	BLCA	01	tumor	0.279676
TCGA.K4.A3WV.01A.11R.A22U.07	BLCA	01	tumor	0.527125
TCGA.K4.A4AB.01B.12R.A28M.07	BLCA	01	tumor	0.322268
TCGA.K4.A4AC.01A.21R.A26T.07	BLCA	01	tumor	0.623272
TCGA.K4.A54R.01A.11R.A26T.07	BLCA	01	tumor	0.578101
TCGA.K4.A5RH.01A.11R.A30C.07	BLCA	01	tumor	0.460237
TCGA.K4.A5RI.01A.11R.A28M.07	BLCA	01	tumor	0.584788
TCGA.K4.A5RJ.01A.11R.A28M.07	BLCA	01	tumor	0.51483
TCGA.K4.A6FZ.01A.11R.A31N.07	BLCA	01	tumor	0.469406
TCGA.K4.A6MB.01A.11R.A31N.07	BLCA	01	tumor	0.477716
TCGA.K4.A83P.01A.11R.A352.07	BLCA	01	tumor	0.369086
TCGA.K4.AAQO.01A.11R.A38B.07	BLCA	01	tumor	0.482018
TCGA.KQ.A41N.01A.11R.A33J.07	BLCA	01	tumor	0.408894
TCGA.KQ.A41O.01A.12R.A352.07	BLCA	01	tumor	0.655085
TCGA.KQ.A41P.01A.12R.A33J.07	BLCA	01	tumor	0.504388
TCGA.KQ.A41Q.01A.11R.A33J.07	BLCA	01	tumor	0.679331
TCGA.KQ.A41R.01A.21R.A352.07	BLCA	01	tumor	0.762302
TCGA.KQ.A41S.01A.12R.A33J.07	BLCA	01	tumor	0.523894
TCGA.LC.A66R.01A.41R.A30C.07	BLCA	01	tumor	0.605628
TCGA.LT.A5Z6.01A.11R.A28M.07	BLCA	01	tumor	0.447561
TCGA.LT.A8JT.01A.11R.A36F.07	BLCA	01	tumor	0.47815
TCGA.MV.A51V.01A.11R.A26T.07	BLCA	01	tumor	0.476442
TCGA.PQ.A6FI.01A.11R.A31N.07	BLCA	01	tumor	0.462947
TCGA.PQ.A6FN.01A.11R.A31N.07	BLCA	01	tumor	0.588787
TCGA.R3.A69X.01A.22R.A30C.07	BLCA	01	tumor	0.486049
TCGA.S5.A6DX.01A.11R.A31N.07	BLCA	01	tumor	0.467968
TCGA.S5.AA26.01A.11R.A38B.07	BLCA	01	tumor	0.698784
TCGA.SY.A9G0.01A.12R.A38B.07	BLCA	01	tumor	0.334656
TCGA.SY.A9G5.01A.11R.A38B.07	BLCA	01	tumor	0.487075
TCGA.UY.A78K.01A.11R.A33J.07	BLCA	01	tumor	0.543757
TCGA.UY.A78L.01A.12R.A33J.07	BLCA	01	tumor	0.49522
TCGA.UY.A78M.01A.21R.A352.07	BLCA	01	tumor	0.562124
TCGA.UY.A78N.01A.12R.A33J.07	BLCA	01	tumor	0.552377
TCGA.UY.A78O.01A.12R.A33J.07	BLCA	01	tumor	0.515197
TCGA.UY.A78P.01A.12R.A36F.07	BLCA	01	tumor	0.486169
TCGA.UY.A8OB.01A.12R.A42T.07	BLCA	01	tumor	0.498381
TCGA.UY.A8OC.01A.11R.A36F.07	BLCA	01	tumor	0.430128
TCGA.UY.A8OD.01A.11R.A36F.07	BLCA	01	tumor	0.605386
TCGA.UY.A9PA.01A.11R.A38B.07	BLCA	01	tumor	0.452399
TCGA.UY.A9PB.01A.11R.A38B.07	BLCA	01	tumor	0.485822
TCGA.UY.A9PD.01A.11R.A38B.07	BLCA	01	tumor	0.55157
TCGA.UY.A9PE.01A.11R.A38B.07	BLCA	01	tumor	0.545611
TCGA.UY.A9PF.01A.11R.A38B.07	BLCA	01	tumor	0.42357
TCGA.UY.A9PH.01A.11R.A38B.07	BLCA	01	tumor	0.546604
TCGA.XF.A8HB.01A.11R.A36F.07	BLCA	01	tumor	0.675541
TCGA.XF.A8HC.01A.11R.A36F.07	BLCA	01	tumor	0.664513
TCGA.XF.A8HD.01A.11R.A36F.07	BLCA	01	tumor	0.530429
TCGA.XF.A8HE.01A.11R.A36F.07	BLCA	01	tumor	0.649132
TCGA.XF.A8HF.01A.11R.A36F.07	BLCA	01	tumor	0.34367
TCGA.XF.A8HG.01A.11R.A36F.07	BLCA	01	tumor	0.623712
TCGA.XF.A8HH.01A.11R.A38B.07	BLCA	01	tumor	0.393752
TCGA.XF.A8HI.01A.11R.A38B.07	BLCA	01	tumor	0.45391
TCGA.XF.A9SH.01A.11R.A39I.07	BLCA	01	tumor	0.402829
TCGA.XF.A9SI.01A.11R.A39I.07	BLCA	01	tumor	0.542148
TCGA.XF.A9SJ.01A.11R.A39I.07	BLCA	01	tumor	0.52937
TCGA.XF.A9SK.01A.11R.A42T.07	BLCA	01	tumor	0.380195
TCGA.XF.A9SL.01A.11R.A39I.07	BLCA	01	tumor	0.327811
TCGA.XF.A9SM.01A.11R.A42T.07	BLCA	01	tumor	0.567026
TCGA.XF.A9SP.01A.11R.A39I.07	BLCA	01	tumor	0.421482
TCGA.XF.A9ST.01A.11R.A42T.07	BLCA	01	tumor	0.937998
TCGA.XF.A9SU.01A.31R.A39I.07	BLCA	01	tumor	0.445433
TCGA.XF.A9SV.01A.21R.A42T.07	BLCA	01	tumor	0.357083
TCGA.XF.A9SW.01A.11R.A42T.07	BLCA	01	tumor	0.33624
TCGA.XF.A9SX.01A.21R.A39I.07	BLCA	01	tumor	0.40292
TCGA.XF.A9SY.01A.21R.A42T.07	BLCA	01	tumor	0.607792
TCGA.XF.A9SZ.01A.11R.A39I.07	BLCA	01	tumor	0.458325
TCGA.XF.A9T0.01A.11R.A39I.07	BLCA	01	tumor	0.64889
TCGA.XF.A9T2.01A.11R.A42T.07	BLCA	01	tumor	0.52656
TCGA.XF.A9T3.01A.11R.A42T.07	BLCA	01	tumor	0.505282
TCGA.XF.A9T4.01A.11R.A39I.07	BLCA	01	tumor	0.458586
TCGA.XF.A9T5.01A.11R.A42T.07	BLCA	01	tumor	0.569851
TCGA.XF.A9T6.01A.11R.A42T.07	BLCA	01	tumor	0.584997
TCGA.XF.A9T8.01A.11R.A39I.07	BLCA	01	tumor	0.511717
TCGA.XF.AAME.01A.12R.A42T.07	BLCA	01	tumor	0.314613
TCGA.XF.AAMG.01A.11R.A42T.07	BLCA	01	tumor	0.722066
TCGA.XF.AAMH.01A.11R.A42T.07	BLCA	01	tumor	0.536019
TCGA.XF.AAMJ.01A.11R.A42T.07	BLCA	01	tumor	0.295525
TCGA.XF.AAML.01A.11R.A42T.07	BLCA	01	tumor	0.628495
TCGA.XF.AAMQ.01A.11R.A42T.07	BLCA	01	tumor	0.539823
TCGA.XF.AAMR.01A.31R.A42T.07	BLCA	01	tumor	0.403453
TCGA.XF.AAMT.01A.11R.A42T.07	BLCA	01	tumor	0.448493
TCGA.XF.AAMW.01A.11R.A42T.07	BLCA	01	tumor	0.458686
TCGA.XF.AAMX.01A.11R.A42T.07	BLCA	01	tumor	0.726198
TCGA.XF.AAMY.01A.11R.A42T.07	BLCA	01	tumor	0.461569
TCGA.XF.AAMZ.01A.11R.A42T.07	BLCA	01	tumor	0.585438
TCGA.XF.AAN0.01A.11R.A42T.07	BLCA	01	tumor	0.555147
TCGA.XF.AAN1.01A.31R.A42T.07	BLCA	01	tumor	0.523129
TCGA.XF.AAN2.01A.11R.A42T.07	BLCA	01	tumor	0.575535
TCGA.XF.AAN3.01A.11R.A42T.07	BLCA	01	tumor	0.378697
TCGA.XF.AAN4.01A.11R.A42T.07	BLCA	01	tumor	0.339367
TCGA.XF.AAN5.01A.11R.A42T.07	BLCA	01	tumor	0.532289
TCGA.XF.AAN7.01A.11R.A42T.07	BLCA	01	tumor	0.620608
TCGA.XF.AAN8.01A.11R.A42T.07	BLCA	01	tumor	0.170737
TCGA.YC.A89H.01A.11R.A36F.07	BLCA	01	tumor	0.55654
TCGA.YC.A8S6.01A.31R.A38B.07	BLCA	01	tumor	0.365203
TCGA.YC.A9TC.01A.22R.A39I.07	BLCA	01	tumor	0.682609
TCGA.YF.AA3L.01A.11R.A38B.07	BLCA	01	tumor	0.456981
TCGA.YF.AA3M.01A.11R.A42T.07	BLCA	01	tumor	0.662869
TCGA.ZF.A9R0.01A.11R.A38B.07	BLCA	01	tumor	0.534372
TCGA.ZF.A9R1.01A.11R.A39I.07	BLCA	01	tumor	0.512742
TCGA.ZF.A9R2.01A.11R.A39I.07	BLCA	01	tumor	0.500309
TCGA.ZF.A9R3.01A.11R.A38B.07	BLCA	01	tumor	0.469942
TCGA.ZF.A9R4.01A.11R.A38B.07	BLCA	01	tumor	0.638026
TCGA.ZF.A9R5.01A.12R.A42T.07	BLCA	01	tumor	0.379859
TCGA.ZF.A9R7.01A.11R.A38B.07	BLCA	01	tumor	0.524453
TCGA.ZF.A9R9.01A.11R.A38B.07	BLCA	01	tumor	0.302389
TCGA.ZF.A9RC.01A.11R.A38B.07	BLCA	01	tumor	0.5768
TCGA.ZF.A9RD.01A.11R.A42T.07	BLCA	01	tumor	0.454496
TCGA.ZF.A9RE.01A.11R.A38B.07	BLCA	01	tumor	0.650904
TCGA.ZF.A9RF.01A.11R.A38B.07	BLCA	01	tumor	0.594514
TCGA.ZF.A9RL.01A.11R.A38B.07	BLCA	01	tumor	0.562751
TCGA.ZF.A9RM.01A.11R.A38B.07	BLCA	01	tumor	0.501063
TCGA.ZF.A9RN.01A.11R.A42T.07	BLCA	01	tumor	0.691661
TCGA.ZF.AA4N.01A.11R.A38B.07	BLCA	01	tumor	0.603864
TCGA.ZF.AA4R.01A.11R.A38B.07	BLCA	01	tumor	0.514645
TCGA.ZF.AA4T.01A.11R.A38B.07	BLCA	01	tumor	0.646707
TCGA.ZF.AA4U.01A.11R.A38B.07	BLCA	01	tumor	0.482472
TCGA.ZF.AA4V.01A.11R.A38B.07	BLCA	01	tumor	0.971507
TCGA.ZF.AA4W.01A.12R.A38B.07	BLCA	01	tumor	0.550091
TCGA.ZF.AA4X.01A.11R.A38B.07	BLCA	01	tumor	0.630741
TCGA.ZF.AA51.01A.21R.A39I.07	BLCA	01	tumor	0.55207
TCGA.ZF.AA52.01A.12R.A39I.07	BLCA	01	tumor	0.425195
TCGA.ZF.AA53.01A.11R.A39I.07	BLCA	01	tumor	0.409191
TCGA.ZF.AA54.01A.11R.A39I.07	BLCA	01	tumor	0.590127
TCGA.ZF.AA56.01A.31R.A39I.07	BLCA	01	tumor	0.482944
TCGA.ZF.AA58.01A.12R.A42T.07	BLCA	01	tumor	0.541487
TCGA.ZF.AA5H.01A.11R.A39I.07	BLCA	01	tumor	0.57165
TCGA.ZF.AA5N.01A.11R.A42T.07	BLCA	01	tumor	0.580084
TCGA.ZF.AA5P.01A.11R.A39I.07	BLCA	01	tumor	0.41534
TCGA.A7.A0CE.11A.21R.A089.07	BRCA	11	normal	0.205513
TCGA.A7.A0CH.11A.32R.A089.07	BRCA	11	normal	0.199726
TCGA.A7.A13E.11A.61R.A12P.07	BRCA	11	normal	0.141789
TCGA.A7.A13F.11A.42R.A12P.07	BRCA	11	normal	0.226316
TCGA.AC.A23H.11A.12R.A157.07	BRCA	11	normal	0.182091
TCGA.AC.A2FB.11A.13R.A17B.07	BRCA	11	normal	0.202825
TCGA.AC.A2FF.11A.13R.A17B.07	BRCA	11	normal	0.288951
TCGA.AC.A2FM.11B.32R.A19W.07	BRCA	11	normal	0.149361
TCGA.BH.A0AU.11A.11R.A12P.07	BRCA	11	normal	0.235214
TCGA.BH.A0AY.11A.23R.A089.07	BRCA	11	normal	0.165835
TCGA.BH.A0AZ.11A.22R.A12P.07	BRCA	11	normal	0.294988
TCGA.BH.A0B3.11B.21R.A089.07	BRCA	11	normal	0.196136
TCGA.BH.A0B7.11A.34R.A115.07	BRCA	11	normal	0.364298
TCGA.BH.A0BA.11A.22R.A19E.07	BRCA	11	normal	0.227484
TCGA.BH.A0BC.11A.22R.A089.07	BRCA	11	normal	0.201304
TCGA.BH.A0BJ.11A.23R.A089.07	BRCA	11	normal	0.299396
TCGA.BH.A0BM.11A.12R.A089.07	BRCA	11	normal	0.207783
TCGA.BH.A0BQ.11A.33R.A115.07	BRCA	11	normal	0.323319
TCGA.BH.A0BS.11A.11R.A12P.07	BRCA	11	normal	0.309063
TCGA.BH.A0BT.11A.21R.A12P.07	BRCA	11	normal	0.220377
TCGA.BH.A0BV.11A.31R.A089.07	BRCA	11	normal	0.283248
TCGA.BH.A0BW.11A.12R.A115.07	BRCA	11	normal	0.350448
TCGA.BH.A0BZ.11A.61R.A12P.07	BRCA	11	normal	0.137637
TCGA.BH.A0C0.11A.21R.A089.07	BRCA	11	normal	0.196028
TCGA.BH.A0C3.11A.23R.A12P.07	BRCA	11	normal	0.265736
TCGA.BH.A0DG.11A.43R.A12P.07	BRCA	11	normal	0.33216
TCGA.BH.A0DH.11A.31R.A089.07	BRCA	11	normal	0.204255
TCGA.BH.A0DK.11A.13R.A089.07	BRCA	11	normal	0.299949
TCGA.BH.A0DL.11A.13R.A115.07	BRCA	11	normal	0.219931
TCGA.BH.A0DO.11A.22R.A12D.07	BRCA	11	normal	0.267246
TCGA.BH.A0DP.11A.12R.A089.07	BRCA	11	normal	0.246691
TCGA.BH.A0DQ.11A.12R.A089.07	BRCA	11	normal	0.283944
TCGA.BH.A0DT.11A.12R.A12D.07	BRCA	11	normal	0.302057
TCGA.BH.A0DV.11A.22R.A12P.07	BRCA	11	normal	0.227645
TCGA.BH.A0DZ.11A.22R.A089.07	BRCA	11	normal	0.311774
TCGA.BH.A0E0.11A.13R.A089.07	BRCA	11	normal	0.245396
TCGA.BH.A0E1.11A.13R.A089.07	BRCA	11	normal	0.318937
TCGA.BH.A0H5.11A.62R.A115.07	BRCA	11	normal	0.308241
TCGA.BH.A0H7.11A.13R.A089.07	BRCA	11	normal	0.290756
TCGA.BH.A0H9.11A.22R.A466.07	BRCA	11	normal	0.202258
TCGA.BH.A0HA.11A.31R.A12P.07	BRCA	11	normal	0.408394
TCGA.BH.A0HK.11A.11R.A089.07	BRCA	11	normal	0.158643
TCGA.BH.A18J.11A.31R.A12D.07	BRCA	11	normal	0.186129
TCGA.BH.A18K.11A.13R.A12D.07	BRCA	11	normal	0.216978
TCGA.BH.A18L.11A.42R.A12D.07	BRCA	11	normal	0.152665
TCGA.BH.A18M.11A.33R.A12D.07	BRCA	11	normal	0.232939
TCGA.BH.A18N.11A.43R.A12D.07	BRCA	11	normal	0.235687
TCGA.BH.A18P.11A.43R.A12D.07	BRCA	11	normal	0.181146
TCGA.BH.A18Q.11A.34R.A12D.07	BRCA	11	normal	0.286722
TCGA.BH.A18R.11A.42R.A12D.07	BRCA	11	normal	0.279578
TCGA.BH.A18S.11A.43R.A12D.07	BRCA	11	normal	0.179481
TCGA.BH.A18U.11A.23R.A12D.07	BRCA	11	normal	0.275081
TCGA.BH.A18V.11A.52R.A12D.07	BRCA	11	normal	0.232764
TCGA.BH.A1EN.11A.23R.A13Q.07	BRCA	11	normal	0.208751
TCGA.BH.A1ET.11B.23R.A137.07	BRCA	11	normal	0.240641
TCGA.BH.A1EU.11A.23R.A137.07	BRCA	11	normal	0.248658
TCGA.BH.A1EV.11A.24R.A137.07	BRCA	11	normal	0.242949
TCGA.BH.A1EW.11B.33R.A137.07	BRCA	11	normal	0.315
TCGA.BH.A1F0.11B.23R.A137.07	BRCA	11	normal	0.182407
TCGA.BH.A1F2.11A.32R.A13Q.07	BRCA	11	normal	0.197464
TCGA.BH.A1F6.11B.94R.A13Q.07	BRCA	11	normal	0.160551
TCGA.BH.A1F8.11B.21R.A13Q.07	BRCA	11	normal	0.25921
TCGA.BH.A1FB.11A.33R.A13Q.07	BRCA	11	normal	0.201194
TCGA.BH.A1FC.11A.32R.A13Q.07	BRCA	11	normal	0.159659
TCGA.BH.A1FD.11B.21R.A13Q.07	BRCA	11	normal	0.178594
TCGA.BH.A1FE.11B.14R.A13Q.07	BRCA	11	normal	0.384224
TCGA.BH.A1FG.11B.12R.A13Q.07	BRCA	11	normal	0.244167
TCGA.BH.A1FH.11B.42R.A13Q.07	BRCA	11	normal	0.221492
TCGA.BH.A1FJ.11B.42R.A13Q.07	BRCA	11	normal	0.212199
TCGA.BH.A1FM.11B.23R.A13Q.07	BRCA	11	normal	0.26144
TCGA.BH.A1FN.11A.34R.A13Q.07	BRCA	11	normal	0.256347
TCGA.BH.A1FR.11B.42R.A13Q.07	BRCA	11	normal	0.211701
TCGA.BH.A1FU.11A.23R.A14D.07	BRCA	11	normal	0.210018
TCGA.BH.A203.11A.42R.A169.07	BRCA	11	normal	0.239271
TCGA.BH.A204.11A.53R.A157.07	BRCA	11	normal	0.160344
TCGA.BH.A208.11A.51R.A157.07	BRCA	11	normal	0.313455
TCGA.BH.A209.11A.42R.A157.07	BRCA	11	normal	0.24902
TCGA.E2.A153.11A.31R.A12D.07	BRCA	11	normal	0.275458
TCGA.E2.A15I.11A.32R.A137.07	BRCA	11	normal	0.198255
TCGA.E2.A15K.11A.13R.A12P.07	BRCA	11	normal	0.187158
TCGA.E2.A15M.11A.22R.A12D.07	BRCA	11	normal	0.156119
TCGA.E2.A1BC.11A.32R.A12P.07	BRCA	11	normal	0.203251
TCGA.E2.A1IG.11A.22R.A144.07	BRCA	11	normal	0.254113
TCGA.E2.A1L7.11A.33R.A144.07	BRCA	11	normal	0.318831
TCGA.E2.A1LB.11A.22R.A144.07	BRCA	11	normal	0.352895
TCGA.E2.A1LH.11A.22R.A14D.07	BRCA	11	normal	0.26244
TCGA.E9.A1N4.11A.33R.A14M.07	BRCA	11	normal	0.368165
TCGA.E9.A1N5.11A.41R.A14D.07	BRCA	11	normal	0.423906
TCGA.E9.A1N6.11A.32R.A144.07	BRCA	11	normal	0.301584
TCGA.E9.A1N9.11A.71R.A14D.07	BRCA	11	normal	0.263898
TCGA.E9.A1NA.11A.33R.A144.07	BRCA	11	normal	0.151544
TCGA.E9.A1ND.11A.43R.A144.07	BRCA	11	normal	0.234298
TCGA.E9.A1NG.11A.52R.A14M.07	BRCA	11	normal	0.226511
TCGA.E9.A1R7.11A.42R.A14M.07	BRCA	11	normal	0.155633
TCGA.E9.A1RB.11A.33R.A157.07	BRCA	11	normal	0.260161
TCGA.E9.A1RD.11A.33R.A157.07	BRCA	11	normal	0.168568
TCGA.E9.A1RH.11A.34R.A169.07	BRCA	11	normal	0.174659
TCGA.GI.A2C9.11A.22R.A21T.07	BRCA	11	normal	0.22761
TCGA.3C.AAAU.01A.11R.A41B.07	BRCA	01	tumor	0.47564
TCGA.3C.AALI.01A.11R.A41B.07	BRCA	01	tumor	0.503258
TCGA.3C.AALJ.01A.31R.A41B.07	BRCA	01	tumor	0.447119
TCGA.3C.AALK.01A.11R.A41B.07	BRCA	01	tumor	0.354122
TCGA.4H.AAAK.01A.12R.A41B.07	BRCA	01	tumor	0.387453
TCGA.5L.AAT0.01A.12R.A41B.07	BRCA	01	tumor	0.338708
TCGA.5T.A9QA.01A.11R.A41B.07	BRCA	01	tumor	0.54566
TCGA.A1.A0SB.01A.11R.A144.07	BRCA	01	tumor	0.454391
TCGA.A1.A0SD.01A.11R.A115.07	BRCA	01	tumor	0.343551
TCGA.A1.A0SE.01A.11R.A084.07	BRCA	01	tumor	0.362856
TCGA.A1.A0SF.01A.11R.A144.07	BRCA	01	tumor	0.402197
TCGA.A1.A0SG.01A.11R.A144.07	BRCA	01	tumor	0.399459
TCGA.A1.A0SH.01A.11R.A084.07	BRCA	01	tumor	0.240159
TCGA.A1.A0SI.01A.11R.A144.07	BRCA	01	tumor	0.443215
TCGA.A1.A0SJ.01A.11R.A084.07	BRCA	01	tumor	0.443629
TCGA.A1.A0SK.01A.12R.A084.07	BRCA	01	tumor	0.880356
TCGA.A1.A0SM.01A.11R.A084.07	BRCA	01	tumor	0.385049
TCGA.A1.A0SN.01A.11R.A144.07	BRCA	01	tumor	0.640573
TCGA.A1.A0SO.01A.22R.A084.07	BRCA	01	tumor	0.785999
TCGA.A1.A0SP.01A.11R.A084.07	BRCA	01	tumor	0.595748
TCGA.A1.A0SQ.01A.21R.A144.07	BRCA	01	tumor	0.447341
TCGA.A2.A04N.01A.11R.A115.07	BRCA	01	tumor	0.41116
TCGA.A2.A04P.01A.31R.A034.07	BRCA	01	tumor	0.382281
TCGA.A2.A04Q.01A.21R.A034.07	BRCA	01	tumor	0.411727
TCGA.A2.A04R.01A.41R.A109.07	BRCA	01	tumor	0.589094
TCGA.A2.A04T.01A.21R.A034.07	BRCA	01	tumor	0.594345
TCGA.A2.A04U.01A.11R.A115.07	BRCA	01	tumor	0.501774
TCGA.A2.A04V.01A.21R.A034.07	BRCA	01	tumor	0.472551
TCGA.A2.A04W.01A.31R.A115.07	BRCA	01	tumor	0.238442
TCGA.A2.A04X.01A.21R.A034.07	BRCA	01	tumor	0.43555
TCGA.A2.A04Y.01A.21R.A034.07	BRCA	01	tumor	0.370248
TCGA.A2.A0CK.01A.11R.A22K.07	BRCA	01	tumor	0.373564
TCGA.A2.A0CL.01A.11R.A115.07	BRCA	01	tumor	0.394907
TCGA.A2.A0CM.01A.31R.A034.07	BRCA	01	tumor	0.453925
TCGA.A2.A0CO.01A.13R.A22K.07	BRCA	01	tumor	0.23771
TCGA.A2.A0CP.01A.11R.A034.07	BRCA	01	tumor	0.264712
TCGA.A2.A0CQ.01A.21R.A034.07	BRCA	01	tumor	0.355442
TCGA.A2.A0CR.01A.11R.A22K.07	BRCA	01	tumor	0.259194
TCGA.A2.A0CS.01A.11R.A115.07	BRCA	01	tumor	0.339516
TCGA.A2.A0CT.01A.31R.A056.07	BRCA	01	tumor	0.480921
TCGA.A2.A0CU.01A.12R.A034.07	BRCA	01	tumor	0.363484
TCGA.A2.A0CV.01A.31R.A115.07	BRCA	01	tumor	0.304931
TCGA.A2.A0CW.01A.21R.A115.07	BRCA	01	tumor	0.633828
TCGA.A2.A0CX.01A.21R.A00Z.07	BRCA	01	tumor	0.442034
TCGA.A2.A0CY.01A.12R.A034.07	BRCA	01	tumor	0.644041
TCGA.A2.A0CZ.01A.11R.A034.07	BRCA	01	tumor	0.161801
TCGA.A2.A0D0.01A.11R.A00Z.07	BRCA	01	tumor	0.604151
TCGA.A2.A0D1.01A.11R.A034.07	BRCA	01	tumor	0.528116
TCGA.A2.A0D2.01A.21R.A034.07	BRCA	01	tumor	0.671801
TCGA.A2.A0D3.01A.11R.A115.07	BRCA	01	tumor	0.364979
TCGA.A2.A0D4.01A.11R.A00Z.07	BRCA	01	tumor	0.520199
TCGA.A2.A0EM.01A.11R.A034.07	BRCA	01	tumor	0.381325
TCGA.A2.A0EN.01A.13R.A084.07	BRCA	01	tumor	0.287812
TCGA.A2.A0EO.01A.11R.A034.07	BRCA	01	tumor	0.291305
TCGA.A2.A0EP.01A.52R.A22U.07	BRCA	01	tumor	0.301812
TCGA.A2.A0EQ.01A.11R.A034.07	BRCA	01	tumor	0.504023
TCGA.A2.A0ER.01A.21R.A034.07	BRCA	01	tumor	0.493534
TCGA.A2.A0ES.01A.11R.A115.07	BRCA	01	tumor	0.255549
TCGA.A2.A0ET.01A.31R.A034.07	BRCA	01	tumor	0.466754
TCGA.A2.A0EU.01A.22R.A056.07	BRCA	01	tumor	0.459268
TCGA.A2.A0EV.01A.11R.A034.07	BRCA	01	tumor	0.41899
TCGA.A2.A0EW.01A.21R.A115.07	BRCA	01	tumor	0.287216
TCGA.A2.A0EX.01A.21R.A034.07	BRCA	01	tumor	0.256041
TCGA.A2.A0EY.01A.11R.A034.07	BRCA	01	tumor	0.484143
TCGA.A2.A0ST.01A.12R.A084.07	BRCA	01	tumor	0.375233
TCGA.A2.A0SU.01A.11R.A084.07	BRCA	01	tumor	0.337774
TCGA.A2.A0SV.01A.11R.A084.07	BRCA	01	tumor	0.44834
TCGA.A2.A0SW.01A.11R.A084.07	BRCA	01	tumor	0.54117
TCGA.A2.A0SX.01A.12R.A084.07	BRCA	01	tumor	0.470789
TCGA.A2.A0SY.01A.31R.A084.07	BRCA	01	tumor	0.427833
TCGA.A2.A0T0.01A.22R.A084.07	BRCA	01	tumor	0.517597
TCGA.A2.A0T1.01A.21R.A084.07	BRCA	01	tumor	0.453793
TCGA.A2.A0T2.01A.11R.A084.07	BRCA	01	tumor	0.367588
TCGA.A2.A0T3.01A.21R.A115.07	BRCA	01	tumor	0.528287
TCGA.A2.A0T4.01A.31R.A084.07	BRCA	01	tumor	0.366869
TCGA.A2.A0T5.01A.21R.A084.07	BRCA	01	tumor	0.466293
TCGA.A2.A0T6.01A.11R.A084.07	BRCA	01	tumor	0.263872
TCGA.A2.A0T7.01A.21R.A084.07	BRCA	01	tumor	0.409933
TCGA.A2.A0YC.01A.11R.A109.07	BRCA	01	tumor	0.396092
TCGA.A2.A0YD.01A.11R.A109.07	BRCA	01	tumor	0.263447
TCGA.A2.A0YE.01A.11R.A109.07	BRCA	01	tumor	0.456606
TCGA.A2.A0YF.01A.21R.A109.07	BRCA	01	tumor	0.491735
TCGA.A2.A0YG.01A.21R.A109.07	BRCA	01	tumor	0.561926
TCGA.A2.A0YH.01A.11R.A109.07	BRCA	01	tumor	0.46707
TCGA.A2.A0YI.01A.31R.A10J.07	BRCA	01	tumor	0.300754
TCGA.A2.A0YJ.01A.11R.A109.07	BRCA	01	tumor	0.51413
TCGA.A2.A0YK.01A.22R.A109.07	BRCA	01	tumor	0.332636
TCGA.A2.A0YL.01A.21R.A109.07	BRCA	01	tumor	0.354791
TCGA.A2.A0YM.01A.11R.A109.07	BRCA	01	tumor	0.543972
TCGA.A2.A0YT.01A.11R.A109.07	BRCA	01	tumor	0.461614
TCGA.A2.A1FV.01A.11R.A13Q.07	BRCA	01	tumor	0.429862
TCGA.A2.A1FW.01A.11R.A13Q.07	BRCA	01	tumor	0.495115
TCGA.A2.A1FX.01A.11R.A13Q.07	BRCA	01	tumor	0.512408
TCGA.A2.A1FZ.01A.51R.A14D.07	BRCA	01	tumor	0.362845
TCGA.A2.A1G0.01A.11R.A13Q.07	BRCA	01	tumor	0.345727
TCGA.A2.A1G1.01A.21R.A13Q.07	BRCA	01	tumor	0.46558
TCGA.A2.A1G4.01A.11R.A13Q.07	BRCA	01	tumor	0.525056
TCGA.A2.A1G6.01A.11R.A13Q.07	BRCA	01	tumor	0.277175
TCGA.A2.A259.01A.11R.A16F.07	BRCA	01	tumor	0.391518
TCGA.A2.A25A.01A.12R.A16F.07	BRCA	01	tumor	0.335925
TCGA.A2.A25B.01A.11R.A169.07	BRCA	01	tumor	0.572482
TCGA.A2.A25C.01A.11R.A169.07	BRCA	01	tumor	0.487849
TCGA.A2.A25D.01A.12R.A16F.07	BRCA	01	tumor	0.409378
TCGA.A2.A25E.01A.11R.A169.07	BRCA	01	tumor	0.561767
TCGA.A2.A25F.01A.11R.A169.07	BRCA	01	tumor	0.395264
TCGA.A2.A3KC.01A.11R.A213.07	BRCA	01	tumor	0.430746
TCGA.A2.A3KD.01A.12R.A213.07	BRCA	01	tumor	0.36912
TCGA.A2.A3XS.01A.11R.A22U.07	BRCA	01	tumor	0.450214
TCGA.A2.A3XT.01A.11R.A22U.07	BRCA	01	tumor	0.568092
TCGA.A2.A3XU.01A.12R.A22U.07	BRCA	01	tumor	0.550547
TCGA.A2.A3XV.01A.21R.A239.07	BRCA	01	tumor	0.281363
TCGA.A2.A3XW.01A.11R.A239.07	BRCA	01	tumor	0.275637
TCGA.A2.A3XX.01A.21R.A239.07	BRCA	01	tumor	0.609712
TCGA.A2.A3XY.01A.11R.A239.07	BRCA	01	tumor	0.410184
TCGA.A2.A3XZ.01A.42R.A239.07	BRCA	01	tumor	0.446789
TCGA.A2.A3Y0.01A.11R.A239.07	BRCA	01	tumor	0.544272
TCGA.A2.A4RW.01A.21R.A266.07	BRCA	01	tumor	0.391074
TCGA.A2.A4RX.01A.11R.A266.07	BRCA	01	tumor	0.389707
TCGA.A2.A4RY.01A.31R.A266.07	BRCA	01	tumor	0.314139
TCGA.A2.A4S0.01A.21R.A266.07	BRCA	01	tumor	0.339576
TCGA.A2.A4S1.01A.21R.A266.07	BRCA	01	tumor	0.299442
TCGA.A2.A4S2.01A.12R.A266.07	BRCA	01	tumor	0.384661
TCGA.A2.A4S3.01A.21R.A266.07	BRCA	01	tumor	0.628699
TCGA.A7.A0CD.01A.11R.A00Z.07	BRCA	01	tumor	0.457396
TCGA.A7.A0CE.01A.11R.A00Z.07	BRCA	01	tumor	0.520462
TCGA.A7.A0CG.01A.12R.A056.07	BRCA	01	tumor	0.27775
TCGA.A7.A0CH.01A.21R.A00Z.07	BRCA	01	tumor	0.391859
TCGA.A7.A0CJ.01A.21R.A00Z.07	BRCA	01	tumor	0.772049
TCGA.A7.A0D9.01A.31R.A056.07	BRCA	01	tumor	0.467288
TCGA.A7.A0DA.01A.31R.A115.07	BRCA	01	tumor	0.33614
TCGA.A7.A0DB.01A.11R.A00Z.07	BRCA	01	tumor	0.312327
TCGA.A7.A13D.01A.13R.A12P.07	BRCA	01	tumor	0.445876
TCGA.A7.A13E.01A.11R.A12P.07	BRCA	01	tumor	0.506873
TCGA.A7.A13F.01A.11R.A12P.07	BRCA	01	tumor	0.515816
TCGA.A7.A13G.01A.11R.A13Q.07	BRCA	01	tumor	0.391288
TCGA.A7.A13H.01A.11R.A22K.07	BRCA	01	tumor	0.338999
TCGA.A7.A26E.01A.11R.A169.07	BRCA	01	tumor	0.389722
TCGA.A7.A26F.01A.21R.A169.07	BRCA	01	tumor	0.485852
TCGA.A7.A26G.01A.21R.A169.07	BRCA	01	tumor	0.412175
TCGA.A7.A26H.01A.11R.A169.07	BRCA	01	tumor	0.412827
TCGA.A7.A26I.01A.11R.A169.07	BRCA	01	tumor	0.429774
TCGA.A7.A26J.01A.11R.A169.07	BRCA	01	tumor	0.500384
TCGA.A7.A2KD.01A.31R.A21T.07	BRCA	01	tumor	0.490888
TCGA.A7.A3IY.01A.21R.A21T.07	BRCA	01	tumor	0.313948
TCGA.A7.A3IZ.01A.11R.A213.07	BRCA	01	tumor	0.536344
TCGA.A7.A3J0.01A.11R.A213.07	BRCA	01	tumor	0.36198
TCGA.A7.A3J1.01A.11R.A213.07	BRCA	01	tumor	0.381117
TCGA.A7.A3RF.01A.11R.A22K.07	BRCA	01	tumor	0.309346
TCGA.A7.A425.01A.11R.A24H.07	BRCA	01	tumor	0.47467
TCGA.A7.A426.01A.22R.A24H.07	BRCA	01	tumor	0.36081
TCGA.A7.A4SA.01A.11R.A266.07	BRCA	01	tumor	0.365569
TCGA.A7.A4SB.01A.21R.A266.07	BRCA	01	tumor	0.355408
TCGA.A7.A4SC.01A.12R.A266.07	BRCA	01	tumor	0.325956
TCGA.A7.A4SD.01A.11R.A266.07	BRCA	01	tumor	0.531487
TCGA.A7.A4SE.01A.11R.A266.07	BRCA	01	tumor	0.446211
TCGA.A7.A4SF.01A.11R.A266.07	BRCA	01	tumor	0.546135
TCGA.A7.A56D.01A.11R.A27Q.07	BRCA	01	tumor	0.382496
TCGA.A7.A5ZV.01A.11R.A28M.07	BRCA	01	tumor	0.491018
TCGA.A7.A5ZW.01A.12R.A29R.07	BRCA	01	tumor	0.323854
TCGA.A7.A5ZX.01A.12R.A29R.07	BRCA	01	tumor	0.317513
TCGA.A7.A6VV.01A.22R.A33J.07	BRCA	01	tumor	0.449646
TCGA.A7.A6VW.01A.21R.A33J.07	BRCA	01	tumor	0.611928
TCGA.A7.A6VX.01A.12R.A33J.07	BRCA	01	tumor	0.512508
TCGA.A7.A6VY.01A.12R.A33J.07	BRCA	01	tumor	0.421753
TCGA.A8.A06N.01A.11R.A00Z.07	BRCA	01	tumor	0.542819
TCGA.A8.A06O.01A.11R.A00Z.07	BRCA	01	tumor	0.542742
TCGA.A8.A06P.01A.11R.A00Z.07	BRCA	01	tumor	0.348159
TCGA.A8.A06Q.01A.11R.A034.07	BRCA	01	tumor	0.522913
TCGA.A8.A06R.01A.11R.A00Z.07	BRCA	01	tumor	0.452682
TCGA.A8.A06T.01A.11R.A00Z.07	BRCA	01	tumor	0.453643
TCGA.A8.A06U.01A.11R.A00Z.07	BRCA	01	tumor	0.37905
TCGA.A8.A06X.01A.21R.A00Z.07	BRCA	01	tumor	0.445459
TCGA.A8.A06Y.01A.21R.A00Z.07	BRCA	01	tumor	0.357758
TCGA.A8.A06Z.01A.11R.A00Z.07	BRCA	01	tumor	0.407739
TCGA.A8.A075.01A.11R.A084.07	BRCA	01	tumor	0.511439
TCGA.A8.A076.01A.21R.A00Z.07	BRCA	01	tumor	0.432923
TCGA.A8.A079.01A.21R.A00Z.07	BRCA	01	tumor	0.534144
TCGA.A8.A07B.01A.11R.A00Z.07	BRCA	01	tumor	0.498968
TCGA.A8.A07C.01A.11R.A034.07	BRCA	01	tumor	0.612957
TCGA.A8.A07E.01A.11R.A034.07	BRCA	01	tumor	0.446802
TCGA.A8.A07F.01A.11R.A00Z.07	BRCA	01	tumor	0.500745
TCGA.A8.A07G.01A.11R.A034.07	BRCA	01	tumor	0.309222
TCGA.A8.A07I.01A.11R.A00Z.07	BRCA	01	tumor	0.465198
TCGA.A8.A07J.01A.11R.A00Z.07	BRCA	01	tumor	0.247298
TCGA.A8.A07L.01A.11R.A00Z.07	BRCA	01	tumor	0.593663
TCGA.A8.A07O.01A.11R.A00Z.07	BRCA	01	tumor	0.677517
TCGA.A8.A07P.01A.11R.A00Z.07	BRCA	01	tumor	0.388226
TCGA.A8.A07R.01A.21R.A034.07	BRCA	01	tumor	0.587074
TCGA.A8.A07S.01A.11R.A034.07	BRCA	01	tumor	0.45784
TCGA.A8.A07U.01A.11R.A034.07	BRCA	01	tumor	0.431091
TCGA.A8.A07W.01A.11R.A00Z.07	BRCA	01	tumor	0.464503
TCGA.A8.A07Z.01A.11R.A00Z.07	BRCA	01	tumor	0.496764
TCGA.A8.A081.01A.11R.A00Z.07	BRCA	01	tumor	0.462979
TCGA.A8.A082.01A.11R.A00Z.07	BRCA	01	tumor	0.514208
TCGA.A8.A083.01A.21R.A00Z.07	BRCA	01	tumor	0.401514
TCGA.A8.A085.01A.11R.A00Z.07	BRCA	01	tumor	0.572418
TCGA.A8.A086.01A.11R.A00Z.07	BRCA	01	tumor	0.523521
TCGA.A8.A08A.01A.11R.A32Y.07	BRCA	01	tumor	0.373349
TCGA.A8.A08B.01A.11R.A00Z.07	BRCA	01	tumor	0.565352
TCGA.A8.A08C.01A.11R.A00Z.07	BRCA	01	tumor	0.417514
TCGA.A8.A08G.01A.11R.A00Z.07	BRCA	01	tumor	0.44734
TCGA.A8.A08H.01A.21R.A00Z.07	BRCA	01	tumor	0.257428
TCGA.A8.A08I.01A.11R.A00Z.07	BRCA	01	tumor	0.471653
TCGA.A8.A08J.01A.11R.A00Z.07	BRCA	01	tumor	0.408543
TCGA.A8.A08L.01A.11R.A00Z.07	BRCA	01	tumor	0.517799
TCGA.A8.A08O.01A.21R.A056.07	BRCA	01	tumor	0.399189
TCGA.A8.A08P.01A.11R.A00Z.07	BRCA	01	tumor	0.398092
TCGA.A8.A08R.01A.11R.A034.07	BRCA	01	tumor	0.577081
TCGA.A8.A08T.01A.21R.A00Z.07	BRCA	01	tumor	0.38814
TCGA.A8.A08X.01A.21R.A00Z.07	BRCA	01	tumor	0.399162
TCGA.A8.A08Z.01A.21R.A00Z.07	BRCA	01	tumor	0.361403
TCGA.A8.A090.01A.11R.A00Z.07	BRCA	01	tumor	0.39014
TCGA.A8.A091.01A.11R.A00Z.07	BRCA	01	tumor	0.46933
TCGA.A8.A092.01A.11R.A00Z.07	BRCA	01	tumor	0.59832
TCGA.A8.A093.01A.11R.A00Z.07	BRCA	01	tumor	0.447392
TCGA.A8.A094.01A.11R.A00Z.07	BRCA	01	tumor	0.383005
TCGA.A8.A095.01A.11R.A00Z.07	BRCA	01	tumor	0.575008
TCGA.A8.A096.01A.11R.A00Z.07	BRCA	01	tumor	0.381075
TCGA.A8.A097.01A.11R.A034.07	BRCA	01	tumor	0.372648
TCGA.A8.A099.01A.11R.A00Z.07	BRCA	01	tumor	0.380275
TCGA.A8.A09A.01A.11R.A00Z.07	BRCA	01	tumor	0.367986
TCGA.A8.A09B.01A.11R.A00Z.07	BRCA	01	tumor	0.403841
TCGA.A8.A09C.01A.11R.A00Z.07	BRCA	01	tumor	0.526772
TCGA.A8.A09D.01A.11R.A00Z.07	BRCA	01	tumor	0.365078
TCGA.A8.A09G.01A.21R.A00Z.07	BRCA	01	tumor	0.537238
TCGA.A8.A09I.01A.22R.A034.07	BRCA	01	tumor	0.574234
TCGA.A8.A09M.01A.11R.A00Z.07	BRCA	01	tumor	0.415396
TCGA.A8.A09N.01A.11R.A00Z.07	BRCA	01	tumor	0.53976
TCGA.A8.A09Q.01A.11R.A00Z.07	BRCA	01	tumor	0.413626
TCGA.A8.A09R.01A.11R.A00Z.07	BRCA	01	tumor	0.333315
TCGA.A8.A09T.01A.11R.A00Z.07	BRCA	01	tumor	0.345758
TCGA.A8.A09V.01A.11R.A034.07	BRCA	01	tumor	0.514505
TCGA.A8.A09W.01A.11R.A00Z.07	BRCA	01	tumor	0.394926
TCGA.A8.A09X.01A.11R.A00Z.07	BRCA	01	tumor	0.429678
TCGA.A8.A09Z.01A.11R.A00Z.07	BRCA	01	tumor	0.421255
TCGA.A8.A0A1.01A.11R.A00Z.07	BRCA	01	tumor	0.383908
TCGA.A8.A0A2.01A.11R.A034.07	BRCA	01	tumor	0.309663
TCGA.A8.A0A4.01A.11R.A00Z.07	BRCA	01	tumor	0.383897
TCGA.A8.A0A6.01A.12R.A056.07	BRCA	01	tumor	0.326888
TCGA.A8.A0A7.01A.11R.A00Z.07	BRCA	01	tumor	0.340829
TCGA.A8.A0A9.01A.11R.A00Z.07	BRCA	01	tumor	0.492128
TCGA.A8.A0AB.01A.11R.A034.07	BRCA	01	tumor	0.513936
TCGA.A8.A0AD.01A.11R.A056.07	BRCA	01	tumor	0.365999
TCGA.AC.A23C.01A.12R.A169.07	BRCA	01	tumor	0.455879
TCGA.AC.A23E.01A.11R.A157.07	BRCA	01	tumor	0.335272
TCGA.AC.A23G.01A.11R.A213.07	BRCA	01	tumor	0.272099
TCGA.AC.A23H.01A.11R.A157.07	BRCA	01	tumor	0.404481
TCGA.AC.A2B8.01A.11R.A17B.07	BRCA	01	tumor	0.398732
TCGA.AC.A2BK.01A.11R.A21T.07	BRCA	01	tumor	0.686089
TCGA.AC.A2BM.01A.11R.A21T.07	BRCA	01	tumor	0.455728
TCGA.AC.A2FB.01A.11R.A17B.07	BRCA	01	tumor	0.314727
TCGA.AC.A2FE.01A.11R.A19W.07	BRCA	01	tumor	0.299777
TCGA.AC.A2FF.01A.11R.A17B.07	BRCA	01	tumor	0.317894
TCGA.AC.A2FG.01A.11R.A17B.07	BRCA	01	tumor	0.345162
TCGA.AC.A2FK.01A.12R.A180.07	BRCA	01	tumor	0.209949
TCGA.AC.A2FM.01A.11R.A19W.07	BRCA	01	tumor	0.469617
TCGA.AC.A2FO.01A.11R.A180.07	BRCA	01	tumor	0.329275
TCGA.AC.A2QH.01A.11R.A18M.07	BRCA	01	tumor	0.406825
TCGA.AC.A2QI.01A.12R.A19W.07	BRCA	01	tumor	0.275388
TCGA.AC.A2QJ.01A.12R.A19W.07	BRCA	01	tumor	0.377646
TCGA.AC.A3BB.01A.21R.A19W.07	BRCA	01	tumor	0.347745
TCGA.AC.A3EH.01A.22R.A22K.07	BRCA	01	tumor	0.425781
TCGA.AC.A3HN.01A.11R.A213.07	BRCA	01	tumor	0.338821
TCGA.AC.A3OD.01A.11R.A21T.07	BRCA	01	tumor	0.3021
TCGA.AC.A3QP.01A.11R.A22U.07	BRCA	01	tumor	0.309666
TCGA.AC.A3QQ.01A.11R.A22K.07	BRCA	01	tumor	0.467615
TCGA.AC.A3TM.01A.11R.A22K.07	BRCA	01	tumor	0.42203
TCGA.AC.A3TN.01A.11R.A22K.07	BRCA	01	tumor	0.375955
TCGA.AC.A3W5.01A.11R.A22K.07	BRCA	01	tumor	0.332147
TCGA.AC.A3W6.01A.12R.A22K.07	BRCA	01	tumor	0.351602
TCGA.AC.A3W7.01A.11R.A22K.07	BRCA	01	tumor	0.367269
TCGA.AC.A3YI.01A.21R.A239.07	BRCA	01	tumor	0.278529
TCGA.AC.A3YJ.01A.11R.A22U.07	BRCA	01	tumor	0.313922
TCGA.AC.A4ZE.01A.11R.A41B.07	BRCA	01	tumor	0.497284
TCGA.AC.A5EH.01A.11R.A28M.07	BRCA	01	tumor	0.394413
TCGA.AC.A5XS.01A.11R.A29R.07	BRCA	01	tumor	0.426684
TCGA.AC.A5XU.01A.11R.A28M.07	BRCA	01	tumor	0.297716
TCGA.AC.A62V.01A.11R.A31O.07	BRCA	01	tumor	0.600242
TCGA.AC.A62X.01A.11R.A29R.07	BRCA	01	tumor	0.496713
TCGA.AC.A62Y.01A.11R.A29R.07	BRCA	01	tumor	0.387867
TCGA.AC.A6IV.01A.12R.A33J.07	BRCA	01	tumor	0.334951
TCGA.AC.A6IW.01A.12R.A33J.07	BRCA	01	tumor	0.490229
TCGA.AC.A6IX.01A.12R.A32P.07	BRCA	01	tumor	0.338331
TCGA.AC.A6IX.06A.11R.A32P.07	BRCA	06	tumor	0.311949
TCGA.AC.A6NO.01A.12R.A33J.07	BRCA	01	tumor	0.50485
TCGA.AC.A7VB.01A.11R.A352.07	BRCA	01	tumor	0.569071
TCGA.AC.A7VC.01A.11R.A352.07	BRCA	01	tumor	0.60102
TCGA.AC.A8OP.01A.11R.A36F.07	BRCA	01	tumor	0.31973
TCGA.AC.A8OQ.01A.11R.A41B.07	BRCA	01	tumor	0.506814
TCGA.AC.A8OR.01A.21R.A41B.07	BRCA	01	tumor	0.412714
TCGA.AC.A8OS.01A.12R.A41B.07	BRCA	01	tumor	0.34564
TCGA.AN.A03X.01A.21R.A00Z.07	BRCA	01	tumor	0.251688
TCGA.AN.A03Y.01A.21R.A00Z.07	BRCA	01	tumor	0.398339
TCGA.AN.A041.01A.11R.A034.07	BRCA	01	tumor	0.37774
TCGA.AN.A046.01A.21R.A034.07	BRCA	01	tumor	0.360347
TCGA.AN.A049.01A.21R.A00Z.07	BRCA	01	tumor	0.42531
TCGA.AN.A04A.01A.21R.A034.07	BRCA	01	tumor	0.344473
TCGA.AN.A04C.01A.21R.A034.07	BRCA	01	tumor	0.562776
TCGA.AN.A04D.01A.21R.A034.07	BRCA	01	tumor	0.58187
TCGA.AN.A0AJ.01A.11R.A00Z.07	BRCA	01	tumor	0.547395
TCGA.AN.A0AK.01A.21R.A00Z.07	BRCA	01	tumor	0.58831
TCGA.AN.A0AL.01A.11R.A00Z.07	BRCA	01	tumor	0.43234
TCGA.AN.A0AM.01A.11R.A034.07	BRCA	01	tumor	0.468204
TCGA.AN.A0AR.01A.11R.A00Z.07	BRCA	01	tumor	0.685749
TCGA.AN.A0AS.01A.11R.A00Z.07	BRCA	01	tumor	0.268729
TCGA.AN.A0AT.01A.11R.A034.07	BRCA	01	tumor	0.590202
TCGA.AN.A0FD.01A.11R.A034.07	BRCA	01	tumor	0.45618
TCGA.AN.A0FF.01A.11R.A034.07	BRCA	01	tumor	0.43231
TCGA.AN.A0FJ.01A.11R.A00Z.07	BRCA	01	tumor	0.616898
TCGA.AN.A0FK.01A.11R.A034.07	BRCA	01	tumor	0.544344
TCGA.AN.A0FL.01A.11R.A034.07	BRCA	01	tumor	0.406289
TCGA.AN.A0FN.01A.11R.A034.07	BRCA	01	tumor	0.268753
TCGA.AN.A0FS.01A.11R.A034.07	BRCA	01	tumor	0.382093
TCGA.AN.A0FT.01A.11R.A034.07	BRCA	01	tumor	0.363104
TCGA.AN.A0FV.01A.11R.A00Z.07	BRCA	01	tumor	0.371343
TCGA.AN.A0FW.01A.11R.A034.07	BRCA	01	tumor	0.405846
TCGA.AN.A0FX.01A.11R.A034.07	BRCA	01	tumor	0.427552
TCGA.AN.A0FY.01A.11R.A034.07	BRCA	01	tumor	0.661868
TCGA.AN.A0FZ.01A.11R.A034.07	BRCA	01	tumor	0.414348
TCGA.AN.A0G0.01A.11R.A034.07	BRCA	01	tumor	0.544085
TCGA.AN.A0XL.01A.11R.A10J.07	BRCA	01	tumor	0.445919
TCGA.AN.A0XN.01A.21R.A109.07	BRCA	01	tumor	0.344158
TCGA.AN.A0XO.01A.11R.A109.07	BRCA	01	tumor	0.337468
TCGA.AN.A0XP.01A.11R.A109.07	BRCA	01	tumor	0.386436
TCGA.AN.A0XR.01A.11R.A109.07	BRCA	01	tumor	0.527764
TCGA.AN.A0XS.01A.22R.A109.07	BRCA	01	tumor	0.34113
TCGA.AN.A0XT.01A.11R.A109.07	BRCA	01	tumor	0.578186
TCGA.AN.A0XU.01A.11R.A109.07	BRCA	01	tumor	0.559308
TCGA.AN.A0XV.01A.11R.A109.07	BRCA	01	tumor	0.38517
TCGA.AN.A0XW.01A.11R.A109.07	BRCA	01	tumor	0.383347
TCGA.AO.A03L.01A.41R.A056.07	BRCA	01	tumor	0.540156
TCGA.AO.A03M.01B.11R.A10J.07	BRCA	01	tumor	0.463236
TCGA.AO.A03N.01B.11R.A10J.07	BRCA	01	tumor	0.322852
TCGA.AO.A03O.01A.11R.A00Z.07	BRCA	01	tumor	0.381038
TCGA.AO.A03P.01A.11R.A00Z.07	BRCA	01	tumor	0.506419
TCGA.AO.A03R.01A.21R.A034.07	BRCA	01	tumor	0.482727
TCGA.AO.A03T.01A.21R.A034.07	BRCA	01	tumor	0.355199
TCGA.AO.A03U.01B.21R.A10J.07	BRCA	01	tumor	0.262557
TCGA.AO.A03V.01A.11R.A115.07	BRCA	01	tumor	0.37916
TCGA.AO.A0J2.01A.11R.A034.07	BRCA	01	tumor	0.490717
TCGA.AO.A0J3.01A.11R.A034.07	BRCA	01	tumor	0.486874
TCGA.AO.A0J4.01A.11R.A034.07	BRCA	01	tumor	0.498252
TCGA.AO.A0J5.01A.11R.A034.07	BRCA	01	tumor	0.371774
TCGA.AO.A0J6.01A.11R.A034.07	BRCA	01	tumor	0.439363
TCGA.AO.A0J7.01A.11R.A034.07	BRCA	01	tumor	0.470654
TCGA.AO.A0J8.01A.21R.A034.07	BRCA	01	tumor	0.330316
TCGA.AO.A0J9.01A.11R.A034.07	BRCA	01	tumor	0.432192
TCGA.AO.A0JA.01A.11R.A056.07	BRCA	01	tumor	0.367866
TCGA.AO.A0JB.01A.11R.A32Y.07	BRCA	01	tumor	0.368775
TCGA.AO.A0JC.01A.11R.A056.07	BRCA	01	tumor	0.373908
TCGA.AO.A0JD.01A.11R.A056.07	BRCA	01	tumor	0.571769
TCGA.AO.A0JE.01A.11R.A056.07	BRCA	01	tumor	0.375847
TCGA.AO.A0JF.01A.11R.A056.07	BRCA	01	tumor	0.220765
TCGA.AO.A0JG.01A.31R.A084.07	BRCA	01	tumor	0.272666
TCGA.AO.A0JI.01A.21R.A056.07	BRCA	01	tumor	0.508519
TCGA.AO.A0JJ.01A.11R.A056.07	BRCA	01	tumor	0.403104
TCGA.AO.A0JL.01A.11R.A056.07	BRCA	01	tumor	0.448667
TCGA.AO.A0JM.01A.21R.A056.07	BRCA	01	tumor	0.381987
TCGA.AO.A124.01A.11R.A10J.07	BRCA	01	tumor	0.539212
TCGA.AO.A125.01A.11R.A10J.07	BRCA	01	tumor	0.475297
TCGA.AO.A126.01A.11R.A10J.07	BRCA	01	tumor	0.392746
TCGA.AO.A128.01A.11R.A10J.07	BRCA	01	tumor	0.483485
TCGA.AO.A129.01A.21R.A10J.07	BRCA	01	tumor	0.486723
TCGA.AO.A12A.01A.21R.A115.07	BRCA	01	tumor	0.37381
TCGA.AO.A12B.01A.11R.A10J.07	BRCA	01	tumor	0.431195
TCGA.AO.A12C.01A.11R.A10J.07	BRCA	01	tumor	0.253755
TCGA.AO.A12D.01A.11R.A115.07	BRCA	01	tumor	0.324626
TCGA.AO.A12E.01A.11R.A10J.07	BRCA	01	tumor	0.351451
TCGA.AO.A12F.01A.11R.A115.07	BRCA	01	tumor	0.583415
TCGA.AO.A12G.01A.11R.A10J.07	BRCA	01	tumor	0.353584
TCGA.AO.A12H.01A.11R.A115.07	BRCA	01	tumor	0.430192
TCGA.AO.A1KO.01A.31R.A13Q.07	BRCA	01	tumor	0.306881
TCGA.AO.A1KP.01A.11R.A13Q.07	BRCA	01	tumor	0.533523
TCGA.AO.A1KQ.01A.11R.A13Q.07	BRCA	01	tumor	0.473884
TCGA.AO.A1KR.01A.12R.A144.07	BRCA	01	tumor	0.580997
TCGA.AO.A1KS.01A.11R.A13Q.07	BRCA	01	tumor	0.564641
TCGA.AO.A1KT.01A.11R.A13Q.07	BRCA	01	tumor	0.442232
TCGA.AQ.A04H.01B.11R.A10J.07	BRCA	01	tumor	0.576966
TCGA.AQ.A04J.01A.02R.A034.07	BRCA	01	tumor	0.417965
TCGA.AQ.A04L.01B.21R.A10J.07	BRCA	01	tumor	0.33506
TCGA.AQ.A0Y5.01A.11R.A14M.07	BRCA	01	tumor	0.381798
TCGA.AQ.A1H2.01A.11R.A13Q.07	BRCA	01	tumor	0.311074
TCGA.AQ.A1H3.01A.31R.A13Q.07	BRCA	01	tumor	0.422264
TCGA.AQ.A54N.01A.11R.A266.07	BRCA	01	tumor	0.534615
TCGA.AQ.A54O.01A.11R.A266.07	BRCA	01	tumor	0.343314
TCGA.AQ.A7U7.01A.22R.A352.07	BRCA	01	tumor	0.345767
TCGA.AR.A0TP.01A.11R.A084.07	BRCA	01	tumor	0.609726
TCGA.AR.A0TQ.01A.11R.A084.07	BRCA	01	tumor	0.52259
TCGA.AR.A0TR.01A.11R.A084.07	BRCA	01	tumor	0.45066
TCGA.AR.A0TS.01A.11R.A115.07	BRCA	01	tumor	0.386633
TCGA.AR.A0TT.01A.31R.A084.07	BRCA	01	tumor	0.397812
TCGA.AR.A0TU.01A.31R.A109.07	BRCA	01	tumor	0.70718
TCGA.AR.A0TV.01A.21R.A084.07	BRCA	01	tumor	0.499409
TCGA.AR.A0TW.01A.11R.A084.07	BRCA	01	tumor	0.408715
TCGA.AR.A0TX.01A.11R.A084.07	BRCA	01	tumor	0.363468
TCGA.AR.A0TY.01A.12R.A115.07	BRCA	01	tumor	0.576679
TCGA.AR.A0TZ.01A.12R.A084.07	BRCA	01	tumor	0.635519
TCGA.AR.A0U0.01A.11R.A109.07	BRCA	01	tumor	0.532934
TCGA.AR.A0U2.01A.11R.A109.07	BRCA	01	tumor	0.618373
TCGA.AR.A0U3.01A.11R.A109.07	BRCA	01	tumor	0.565184
TCGA.AR.A0U4.01A.11R.A109.07	BRCA	01	tumor	0.466043
TCGA.AR.A1AH.01A.11R.A12D.07	BRCA	01	tumor	0.594655
TCGA.AR.A1AI.01A.11R.A12P.07	BRCA	01	tumor	0.550515
TCGA.AR.A1AJ.01A.21R.A12P.07	BRCA	01	tumor	0.469928
TCGA.AR.A1AK.01A.21R.A12P.07	BRCA	01	tumor	0.392234
TCGA.AR.A1AL.01A.21R.A12P.07	BRCA	01	tumor	0.323347
TCGA.AR.A1AM.01A.41R.A22K.07	BRCA	01	tumor	0.239654
TCGA.AR.A1AN.01A.11R.A12P.07	BRCA	01	tumor	0.37497
TCGA.AR.A1AO.01A.11R.A12P.07	BRCA	01	tumor	0.280064
TCGA.AR.A1AP.01A.11R.A12P.07	BRCA	01	tumor	0.295322
TCGA.AR.A1AQ.01A.11R.A12P.07	BRCA	01	tumor	0.595732
TCGA.AR.A1AR.01A.31R.A137.07	BRCA	01	tumor	0.513679
TCGA.AR.A1AS.01A.11R.A12P.07	BRCA	01	tumor	0.494477
TCGA.AR.A1AT.01A.11R.A12P.07	BRCA	01	tumor	0.474857
TCGA.AR.A1AU.01A.11R.A12P.07	BRCA	01	tumor	0.302146
TCGA.AR.A1AV.01A.21R.A12P.07	BRCA	01	tumor	0.478997
TCGA.AR.A1AW.01A.21R.A12P.07	BRCA	01	tumor	0.427073
TCGA.AR.A1AX.01A.11R.A12P.07	BRCA	01	tumor	0.403545
TCGA.AR.A1AY.01A.21R.A12P.07	BRCA	01	tumor	0.704878
TCGA.AR.A24H.01A.11R.A169.07	BRCA	01	tumor	0.599279
TCGA.AR.A24K.01A.11R.A169.07	BRCA	01	tumor	0.643429
TCGA.AR.A24L.01A.11R.A169.07	BRCA	01	tumor	0.416539
TCGA.AR.A24M.01A.11R.A169.07	BRCA	01	tumor	0.402764
TCGA.AR.A24N.01A.11R.A169.07	BRCA	01	tumor	0.498598
TCGA.AR.A24O.01A.11R.A169.07	BRCA	01	tumor	0.380987
TCGA.AR.A24P.01A.11R.A169.07	BRCA	01	tumor	0.438395
TCGA.AR.A24Q.01A.12R.A169.07	BRCA	01	tumor	0.476522
TCGA.AR.A24R.01A.11R.A169.07	BRCA	01	tumor	0.493477
TCGA.AR.A24S.01A.11R.A169.07	BRCA	01	tumor	0.465512
TCGA.AR.A24T.01A.11R.A169.07	BRCA	01	tumor	0.405597
TCGA.AR.A24U.01A.11R.A169.07	BRCA	01	tumor	0.37739
TCGA.AR.A24V.01A.21R.A169.07	BRCA	01	tumor	0.365112
TCGA.AR.A24W.01A.11R.A169.07	BRCA	01	tumor	0.295013
TCGA.AR.A24X.01A.11R.A169.07	BRCA	01	tumor	0.413572
TCGA.AR.A24Z.01A.11R.A169.07	BRCA	01	tumor	0.512104
TCGA.AR.A250.01A.31R.A169.07	BRCA	01	tumor	0.352712
TCGA.AR.A251.01A.12R.A169.07	BRCA	01	tumor	0.568242
TCGA.AR.A252.01A.11R.A169.07	BRCA	01	tumor	0.273569
TCGA.AR.A254.01A.21R.A169.07	BRCA	01	tumor	0.50955
TCGA.AR.A255.01A.11R.A169.07	BRCA	01	tumor	0.367002
TCGA.AR.A256.01A.11R.A169.07	BRCA	01	tumor	0.574878
TCGA.AR.A2LE.01A.11R.A180.07	BRCA	01	tumor	0.398932
TCGA.AR.A2LH.01A.31R.A18M.07	BRCA	01	tumor	0.369322
TCGA.AR.A2LJ.01A.12R.A19W.07	BRCA	01	tumor	0.318188
TCGA.AR.A2LK.01A.11R.A180.07	BRCA	01	tumor	0.550086
TCGA.AR.A2LM.01A.11R.A180.07	BRCA	01	tumor	0.365964
TCGA.AR.A2LN.01A.21R.A18M.07	BRCA	01	tumor	0.288241
TCGA.AR.A2LO.01A.31R.A18M.07	BRCA	01	tumor	0.423903
TCGA.AR.A2LQ.01A.22R.A18M.07	BRCA	01	tumor	0.234329
TCGA.AR.A5QM.01A.11R.A27Q.07	BRCA	01	tumor	0.358604
TCGA.AR.A5QN.01A.12R.A28M.07	BRCA	01	tumor	0.403159
TCGA.AR.A5QP.01A.11R.A28M.07	BRCA	01	tumor	0.371761
TCGA.AR.A5QQ.01A.11R.A28M.07	BRCA	01	tumor	0.494024
TCGA.B6.A0I1.01A.11R.A21T.07	BRCA	01	tumor	0.578407
TCGA.B6.A0I2.01A.11R.A034.07	BRCA	01	tumor	0.79983
TCGA.B6.A0I5.01A.11R.A034.07	BRCA	01	tumor	0.348906
TCGA.B6.A0I6.01A.11R.A034.07	BRCA	01	tumor	0.755778
TCGA.B6.A0I8.01A.11R.A034.07	BRCA	01	tumor	0.420824
TCGA.B6.A0I9.01A.11R.A034.07	BRCA	01	tumor	0.406588
TCGA.B6.A0IA.01A.11R.A034.07	BRCA	01	tumor	0.468556
TCGA.B6.A0IB.01A.11R.A034.07	BRCA	01	tumor	0.493374
TCGA.B6.A0IC.01A.11R.A034.07	BRCA	01	tumor	0.466374
TCGA.B6.A0IE.01A.11R.A034.07	BRCA	01	tumor	0.420011
TCGA.B6.A0IG.01A.11R.A034.07	BRCA	01	tumor	0.558911
TCGA.B6.A0IH.01A.11R.A115.07	BRCA	01	tumor	0.317766
TCGA.B6.A0IJ.01A.11R.A034.07	BRCA	01	tumor	0.619271
TCGA.B6.A0IK.01A.12R.A056.07	BRCA	01	tumor	0.282401
TCGA.B6.A0IM.01A.11R.A034.07	BRCA	01	tumor	0.456415
TCGA.B6.A0IN.01A.11R.A034.07	BRCA	01	tumor	0.276163
TCGA.B6.A0IO.01A.11R.A034.07	BRCA	01	tumor	0.392577
TCGA.B6.A0IP.01A.11R.A034.07	BRCA	01	tumor	0.429574
TCGA.B6.A0IQ.01A.11R.A034.07	BRCA	01	tumor	0.588515
TCGA.B6.A0RE.01A.11R.A056.07	BRCA	01	tumor	0.522941
TCGA.B6.A0RG.01A.11R.A056.07	BRCA	01	tumor	0.317631
TCGA.B6.A0RH.01A.21R.A115.07	BRCA	01	tumor	0.362715
TCGA.B6.A0RI.01A.11R.A056.07	BRCA	01	tumor	0.464122
TCGA.B6.A0RL.01A.11R.A084.07	BRCA	01	tumor	0.574314
TCGA.B6.A0RM.01A.11R.A084.07	BRCA	01	tumor	0.555677
TCGA.B6.A0RN.01A.12R.A084.07	BRCA	01	tumor	0.362569
TCGA.B6.A0RO.01A.22R.A084.07	BRCA	01	tumor	0.402297
TCGA.B6.A0RP.01A.21R.A084.07	BRCA	01	tumor	0.3791
TCGA.B6.A0RQ.01A.11R.A115.07	BRCA	01	tumor	0.277681
TCGA.B6.A0RS.01A.11R.A084.07	BRCA	01	tumor	0.425405
TCGA.B6.A0RT.01A.21R.A084.07	BRCA	01	tumor	0.409199
TCGA.B6.A0RU.01A.11R.A084.07	BRCA	01	tumor	0.50504
TCGA.B6.A0RV.01A.11R.A084.07	BRCA	01	tumor	0.43826
TCGA.B6.A0WS.01A.11R.A115.07	BRCA	01	tumor	0.431744
TCGA.B6.A0WT.01A.11R.A109.07	BRCA	01	tumor	0.402328
TCGA.B6.A0WV.01A.11R.A109.07	BRCA	01	tumor	0.50272
TCGA.B6.A0WW.01A.11R.A109.07	BRCA	01	tumor	0.301253
TCGA.B6.A0WX.01A.11R.A109.07	BRCA	01	tumor	0.284733
TCGA.B6.A0WY.01A.11R.A109.07	BRCA	01	tumor	0.317164
TCGA.B6.A0WZ.01A.11R.A109.07	BRCA	01	tumor	0.393347
TCGA.B6.A0X0.01A.21R.A115.07	BRCA	01	tumor	0.499864
TCGA.B6.A0X1.01A.11R.A109.07	BRCA	01	tumor	0.683685
TCGA.B6.A0X4.01A.11R.A109.07	BRCA	01	tumor	0.358303
TCGA.B6.A0X5.01A.21R.A109.07	BRCA	01	tumor	0.70644
TCGA.B6.A0X7.01A.11R.A10J.07	BRCA	01	tumor	0.311993
TCGA.B6.A1KC.01B.11R.A157.07	BRCA	01	tumor	0.554387
TCGA.B6.A1KF.01A.11R.A13Q.07	BRCA	01	tumor	0.504235
TCGA.B6.A1KI.01A.11R.A14M.07	BRCA	01	tumor	0.254003
TCGA.B6.A1KN.01A.11R.A13Q.07	BRCA	01	tumor	0.526825
TCGA.B6.A2IU.01A.32R.A18M.07	BRCA	01	tumor	0.493898
TCGA.B6.A3ZX.01A.11R.A239.07	BRCA	01	tumor	0.457752
TCGA.B6.A400.01A.11R.A239.07	BRCA	01	tumor	0.510591
TCGA.B6.A401.01A.11R.A239.07	BRCA	01	tumor	0.338693
TCGA.B6.A402.01A.11R.A239.07	BRCA	01	tumor	0.592654
TCGA.B6.A408.01A.12R.A24H.07	BRCA	01	tumor	0.325334
TCGA.B6.A409.01A.11R.A24H.07	BRCA	01	tumor	0.486372
TCGA.B6.A40B.01A.11R.A239.07	BRCA	01	tumor	0.372081
TCGA.B6.A40C.01A.11R.A239.07	BRCA	01	tumor	0.458837
TCGA.BH.A0AU.01A.11R.A12P.07	BRCA	01	tumor	0.413218
TCGA.BH.A0AV.01A.31R.A115.07	BRCA	01	tumor	0.439755
TCGA.BH.A0AW.01A.11R.A056.07	BRCA	01	tumor	0.391785
TCGA.BH.A0AY.01A.21R.A00Z.07	BRCA	01	tumor	0.392927
TCGA.BH.A0AZ.01A.21R.A12P.07	BRCA	01	tumor	0.244516
TCGA.BH.A0B0.01A.21R.A115.07	BRCA	01	tumor	0.320136
TCGA.BH.A0B1.01A.12R.A056.07	BRCA	01	tumor	0.359238
TCGA.BH.A0B2.01A.11R.A10J.07	BRCA	01	tumor	0.303397
TCGA.BH.A0B3.01A.11R.A056.07	BRCA	01	tumor	0.474272
TCGA.BH.A0B4.01A.11R.A00Z.07	BRCA	01	tumor	0.365368
TCGA.BH.A0B5.01A.11R.A12P.07	BRCA	01	tumor	0.51334
TCGA.BH.A0B7.01A.12R.A115.07	BRCA	01	tumor	0.282581
TCGA.BH.A0B8.01A.21R.A056.07	BRCA	01	tumor	0.456255
TCGA.BH.A0B9.01A.11R.A056.07	BRCA	01	tumor	0.608161
TCGA.BH.A0BA.01A.11R.A056.07	BRCA	01	tumor	0.450905
TCGA.BH.A0BC.01A.22R.A084.07	BRCA	01	tumor	0.455728
TCGA.BH.A0BD.01A.11R.A034.07	BRCA	01	tumor	0.442854
TCGA.BH.A0BF.01A.21R.A12P.07	BRCA	01	tumor	0.373354
TCGA.BH.A0BG.01A.11R.A115.07	BRCA	01	tumor	0.452377
TCGA.BH.A0BJ.01A.11R.A056.07	BRCA	01	tumor	0.383877
TCGA.BH.A0BL.01A.11R.A115.07	BRCA	01	tumor	0.418629
TCGA.BH.A0BM.01A.11R.A056.07	BRCA	01	tumor	0.185594
TCGA.BH.A0BO.01A.23R.A12D.07	BRCA	01	tumor	0.238018
TCGA.BH.A0BP.01A.11R.A115.07	BRCA	01	tumor	0.274531
TCGA.BH.A0BQ.01A.21R.A115.07	BRCA	01	tumor	0.338835
TCGA.BH.A0BR.01A.21R.A115.07	BRCA	01	tumor	0.396313
TCGA.BH.A0BS.01A.11R.A12P.07	BRCA	01	tumor	0.39312
TCGA.BH.A0BT.01A.11R.A12P.07	BRCA	01	tumor	0.381539
TCGA.BH.A0BV.01A.11R.A00Z.07	BRCA	01	tumor	0.369994
TCGA.BH.A0BW.01A.11R.A115.07	BRCA	01	tumor	0.289821
TCGA.BH.A0BZ.01A.31R.A12P.07	BRCA	01	tumor	0.498017
TCGA.BH.A0C0.01A.21R.A056.07	BRCA	01	tumor	0.462539
TCGA.BH.A0C1.01B.11R.A12D.07	BRCA	01	tumor	0.367063
TCGA.BH.A0C3.01A.21R.A12P.07	BRCA	01	tumor	0.341158
TCGA.BH.A0C7.01B.11R.A115.07	BRCA	01	tumor	0.580992
TCGA.BH.A0DD.01A.31R.A12P.07	BRCA	01	tumor	0.631034
TCGA.BH.A0DE.01A.11R.A115.07	BRCA	01	tumor	0.320823
TCGA.BH.A0DG.01A.21R.A12P.07	BRCA	01	tumor	0.308552
TCGA.BH.A0DH.01A.11R.A084.07	BRCA	01	tumor	0.368923
TCGA.BH.A0DI.01A.21R.A12P.07	BRCA	01	tumor	0.24155
TCGA.BH.A0DK.01A.21R.A056.07	BRCA	01	tumor	0.368247
TCGA.BH.A0DL.01A.11R.A115.07	BRCA	01	tumor	0.455261
TCGA.BH.A0DO.01B.11R.A12D.07	BRCA	01	tumor	0.362012
TCGA.BH.A0DP.01A.21R.A056.07	BRCA	01	tumor	0.378877
TCGA.BH.A0DQ.01A.11R.A084.07	BRCA	01	tumor	0.423663
TCGA.BH.A0DS.01A.11R.A056.07	BRCA	01	tumor	0.240509
TCGA.BH.A0DT.01A.21R.A12D.07	BRCA	01	tumor	0.366185
TCGA.BH.A0DV.01A.21R.A12P.07	BRCA	01	tumor	0.188576
TCGA.BH.A0DX.01A.11R.A115.07	BRCA	01	tumor	0.378505
TCGA.BH.A0DZ.01A.11R.A00Z.07	BRCA	01	tumor	0.395585
TCGA.BH.A0E0.01A.11R.A056.07	BRCA	01	tumor	0.4216
TCGA.BH.A0E1.01A.11R.A056.07	BRCA	01	tumor	0.432474
TCGA.BH.A0E2.01A.11R.A056.07	BRCA	01	tumor	0.414242
TCGA.BH.A0E6.01A.11R.A034.07	BRCA	01	tumor	0.461197
TCGA.BH.A0E7.01A.11R.A034.07	BRCA	01	tumor	0.398945
TCGA.BH.A0E9.01B.11R.A115.07	BRCA	01	tumor	0.312572
TCGA.BH.A0EA.01A.11R.A115.07	BRCA	01	tumor	0.280986
TCGA.BH.A0EB.01A.11R.A034.07	BRCA	01	tumor	0.336441
TCGA.BH.A0EE.01A.11R.A034.07	BRCA	01	tumor	0.551776
TCGA.BH.A0EI.01A.11R.A115.07	BRCA	01	tumor	0.37336
TCGA.BH.A0GY.01A.11R.A056.07	BRCA	01	tumor	0.318513
TCGA.BH.A0GZ.01A.11R.A056.07	BRCA	01	tumor	0.384479
TCGA.BH.A0H0.01A.11R.A056.07	BRCA	01	tumor	0.701787
TCGA.BH.A0H3.01A.11R.A12P.07	BRCA	01	tumor	0.331792
TCGA.BH.A0H5.01A.21R.A115.07	BRCA	01	tumor	0.303149
TCGA.BH.A0H6.01A.21R.A056.07	BRCA	01	tumor	0.395782
TCGA.BH.A0H7.01A.13R.A056.07	BRCA	01	tumor	0.376263
TCGA.BH.A0H9.01A.11R.A056.07	BRCA	01	tumor	0.433846
TCGA.BH.A0HA.01A.11R.A12P.07	BRCA	01	tumor	0.323694
TCGA.BH.A0HB.01A.11R.A056.07	BRCA	01	tumor	0.460819
TCGA.BH.A0HF.01A.11R.A056.07	BRCA	01	tumor	0.261475
TCGA.BH.A0HI.01A.11R.A084.07	BRCA	01	tumor	0.33434
TCGA.BH.A0HK.01A.11R.A056.07	BRCA	01	tumor	0.276613
TCGA.BH.A0HL.01A.11R.A10U.07	BRCA	01	tumor	0.543967
TCGA.BH.A0HN.01A.11R.A10U.07	BRCA	01	tumor	0.40903
TCGA.BH.A0HO.01A.11R.A034.07	BRCA	01	tumor	0.425594
TCGA.BH.A0HP.01A.12R.A084.07	BRCA	01	tumor	0.329689
TCGA.BH.A0HQ.01A.11R.A034.07	BRCA	01	tumor	0.389621
TCGA.BH.A0HU.01A.11R.A034.07	BRCA	01	tumor	0.599562
TCGA.BH.A0HW.01A.11R.A034.07	BRCA	01	tumor	0.533042
TCGA.BH.A0HX.01A.21R.A056.07	BRCA	01	tumor	0.37534
TCGA.BH.A0HY.01A.11R.A056.07	BRCA	01	tumor	0.36531
TCGA.BH.A0RX.01A.21R.A084.07	BRCA	01	tumor	0.453965
TCGA.BH.A0W3.01A.11R.A109.07	BRCA	01	tumor	0.57831
TCGA.BH.A0W4.01A.11R.A109.07	BRCA	01	tumor	0.415902
TCGA.BH.A0W5.01A.11R.A109.07	BRCA	01	tumor	0.36372
TCGA.BH.A0W7.01A.11R.A115.07	BRCA	01	tumor	0.47671
TCGA.BH.A0WA.01A.11R.A109.07	BRCA	01	tumor	0.505604
TCGA.BH.A18F.01A.11R.A12D.07	BRCA	01	tumor	0.510279
TCGA.BH.A18G.01A.11R.A12D.07	BRCA	01	tumor	0.353539
TCGA.BH.A18H.01A.11R.A12D.07	BRCA	01	tumor	0.386811
TCGA.BH.A18I.01A.11R.A12D.07	BRCA	01	tumor	0.423926
TCGA.BH.A18J.01A.11R.A12D.07	BRCA	01	tumor	0.437797
TCGA.BH.A18K.01A.11R.A12D.07	BRCA	01	tumor	0.427476
TCGA.BH.A18L.01A.32R.A12D.07	BRCA	01	tumor	0.599129
TCGA.BH.A18M.01A.11R.A12D.07	BRCA	01	tumor	0.41135
TCGA.BH.A18N.01A.11R.A12D.07	BRCA	01	tumor	0.401536
TCGA.BH.A18P.01A.11R.A12D.07	BRCA	01	tumor	0.507171
TCGA.BH.A18Q.01A.12R.A12D.07	BRCA	01	tumor	0.486948
TCGA.BH.A18R.01A.11R.A12D.07	BRCA	01	tumor	0.643062
TCGA.BH.A18S.01A.11R.A12D.07	BRCA	01	tumor	0.39419
TCGA.BH.A18T.01A.11R.A12D.07	BRCA	01	tumor	0.626646
TCGA.BH.A18U.01A.21R.A12D.07	BRCA	01	tumor	0.599141
TCGA.BH.A18V.01A.11R.A12D.07	BRCA	01	tumor	0.537959
TCGA.BH.A18V.06A.11R.A213.07	BRCA	06	tumor	0.548248
TCGA.BH.A1EN.01A.11R.A13Q.07	BRCA	01	tumor	0.386019
TCGA.BH.A1EO.01A.11R.A137.07	BRCA	01	tumor	0.306218
TCGA.BH.A1ES.01A.11R.A137.07	BRCA	01	tumor	0.38142
TCGA.BH.A1ES.06A.12R.A24H.07	BRCA	06	tumor	0.333811
TCGA.BH.A1ET.01A.11R.A137.07	BRCA	01	tumor	0.28636
TCGA.BH.A1EU.01A.11R.A137.07	BRCA	01	tumor	0.324071
TCGA.BH.A1EV.01A.11R.A137.07	BRCA	01	tumor	0.428374
TCGA.BH.A1EW.01A.11R.A137.07	BRCA	01	tumor	0.392653
TCGA.BH.A1EX.01A.11R.A13Q.07	BRCA	01	tumor	0.412483
TCGA.BH.A1EY.01A.11R.A13Q.07	BRCA	01	tumor	0.315636
TCGA.BH.A1F0.01A.11R.A137.07	BRCA	01	tumor	0.469047
TCGA.BH.A1F2.01A.31R.A13Q.07	BRCA	01	tumor	0.356808
TCGA.BH.A1F6.01A.11R.A13Q.07	BRCA	01	tumor	0.459924
TCGA.BH.A1F8.01A.11R.A13Q.07	BRCA	01	tumor	0.441974
TCGA.BH.A1FB.01A.11R.A13Q.07	BRCA	01	tumor	0.274562
TCGA.BH.A1FC.01A.11R.A13Q.07	BRCA	01	tumor	0.593407
TCGA.BH.A1FD.01A.11R.A13Q.07	BRCA	01	tumor	0.483228
TCGA.BH.A1FE.01A.11R.A13Q.07	BRCA	01	tumor	0.354152
TCGA.BH.A1FE.06A.11R.A213.07	BRCA	06	tumor	0.179174
TCGA.BH.A1FG.01A.11R.A13Q.07	BRCA	01	tumor	0.408897
TCGA.BH.A1FH.01A.12R.A13Q.07	BRCA	01	tumor	0.245476
TCGA.BH.A1FJ.01A.11R.A13Q.07	BRCA	01	tumor	0.582473
TCGA.BH.A1FL.01A.11R.A13Q.07	BRCA	01	tumor	0.496984
TCGA.BH.A1FM.01A.11R.A13Q.07	BRCA	01	tumor	0.549449
TCGA.BH.A1FN.01A.11R.A13Q.07	BRCA	01	tumor	0.455076
TCGA.BH.A1FR.01A.11R.A13Q.07	BRCA	01	tumor	0.463432
TCGA.BH.A1FU.01A.11R.A14D.07	BRCA	01	tumor	0.39825
TCGA.BH.A201.01A.11R.A14M.07	BRCA	01	tumor	0.371547
TCGA.BH.A202.01A.11R.A14M.07	BRCA	01	tumor	0.454469
TCGA.BH.A203.01A.12R.A169.07	BRCA	01	tumor	0.440093
TCGA.BH.A204.01A.11R.A157.07	BRCA	01	tumor	0.656774
TCGA.BH.A208.01A.11R.A157.07	BRCA	01	tumor	0.186741
TCGA.BH.A209.01A.11R.A157.07	BRCA	01	tumor	0.534357
TCGA.BH.A28O.01A.11R.A22K.07	BRCA	01	tumor	0.269527
TCGA.BH.A28Q.01A.11R.A16F.07	BRCA	01	tumor	0.436468
TCGA.BH.A2L8.01A.11R.A18M.07	BRCA	01	tumor	0.366019
TCGA.BH.A42T.01A.11R.A24H.07	BRCA	01	tumor	0.488838
TCGA.BH.A42U.01A.12R.A24H.07	BRCA	01	tumor	0.236173
TCGA.BH.A42V.01A.11R.A24H.07	BRCA	01	tumor	0.337338
TCGA.BH.A5IZ.01A.11R.A27Q.07	BRCA	01	tumor	0.464934
TCGA.BH.A5J0.01A.11R.A27Q.07	BRCA	01	tumor	0.381635
TCGA.BH.A6R8.01A.21R.A33J.07	BRCA	01	tumor	0.415614
TCGA.BH.A6R9.01A.21R.A32P.07	BRCA	01	tumor	0.276112
TCGA.BH.A8FY.01A.11R.A36F.07	BRCA	01	tumor	0.438217
TCGA.BH.A8FZ.01A.11R.A352.07	BRCA	01	tumor	0.337169
TCGA.BH.A8G0.01A.11R.A352.07	BRCA	01	tumor	0.233698
TCGA.BH.AB28.01A.31R.A41B.07	BRCA	01	tumor	0.421565
TCGA.C8.A12K.01A.21R.A115.07	BRCA	01	tumor	0.577142
TCGA.C8.A12L.01A.11R.A115.07	BRCA	01	tumor	0.497918
TCGA.C8.A12M.01A.11R.A115.07	BRCA	01	tumor	0.417808
TCGA.C8.A12N.01A.11R.A115.07	BRCA	01	tumor	0.37534
TCGA.C8.A12O.01A.11R.A115.07	BRCA	01	tumor	0.400046
TCGA.C8.A12P.01A.11R.A115.07	BRCA	01	tumor	0.410187
TCGA.C8.A12Q.01A.11R.A115.07	BRCA	01	tumor	0.419515
TCGA.C8.A12T.01A.11R.A115.07	BRCA	01	tumor	0.492571
TCGA.C8.A12U.01A.11R.A115.07	BRCA	01	tumor	0.500852
TCGA.C8.A12V.01A.11R.A115.07	BRCA	01	tumor	0.425565
TCGA.C8.A12W.01A.11R.A115.07	BRCA	01	tumor	0.493986
TCGA.C8.A12X.01A.11R.A115.07	BRCA	01	tumor	0.433867
TCGA.C8.A12Y.01A.11R.A12D.07	BRCA	01	tumor	0.413895
TCGA.C8.A12Z.01A.11R.A115.07	BRCA	01	tumor	0.463829
TCGA.C8.A130.01A.31R.A115.07	BRCA	01	tumor	0.533029
TCGA.C8.A131.01A.11R.A115.07	BRCA	01	tumor	0.621329
TCGA.C8.A132.01A.31R.A115.07	BRCA	01	tumor	0.345027
TCGA.C8.A133.01A.32R.A12D.07	BRCA	01	tumor	0.410633
TCGA.C8.A134.01A.11R.A115.07	BRCA	01	tumor	0.431547
TCGA.C8.A135.01A.11R.A115.07	BRCA	01	tumor	0.328744
TCGA.C8.A137.01A.11R.A115.07	BRCA	01	tumor	0.476924
TCGA.C8.A138.01A.11R.A115.07	BRCA	01	tumor	0.39378
TCGA.C8.A1HE.01A.11R.A13Q.07	BRCA	01	tumor	0.41583
TCGA.C8.A1HF.01A.11R.A137.07	BRCA	01	tumor	0.562019
TCGA.C8.A1HG.01A.11R.A137.07	BRCA	01	tumor	0.525803
TCGA.C8.A1HI.01A.11R.A137.07	BRCA	01	tumor	0.343286
TCGA.C8.A1HJ.01A.11R.A13Q.07	BRCA	01	tumor	0.638163
TCGA.C8.A1HK.01A.21R.A13Q.07	BRCA	01	tumor	0.547049
TCGA.C8.A1HL.01A.11R.A137.07	BRCA	01	tumor	0.548157
TCGA.C8.A1HM.01A.12R.A137.07	BRCA	01	tumor	0.558058
TCGA.C8.A1HN.01A.11R.A137.07	BRCA	01	tumor	0.501741
TCGA.C8.A1HO.01A.11R.A13Q.07	BRCA	01	tumor	0.515162
TCGA.C8.A26V.01A.11R.A16F.07	BRCA	01	tumor	0.337037
TCGA.C8.A26W.01A.11R.A16F.07	BRCA	01	tumor	0.513582
TCGA.C8.A26X.01A.31R.A16F.07	BRCA	01	tumor	0.352715
TCGA.C8.A26Y.01A.11R.A16F.07	BRCA	01	tumor	0.401403
TCGA.C8.A26Z.01A.11R.A16F.07	BRCA	01	tumor	0.483899
TCGA.C8.A273.01A.11R.A16F.07	BRCA	01	tumor	0.461333
TCGA.C8.A274.01A.11R.A16F.07	BRCA	01	tumor	0.469103
TCGA.C8.A275.01A.21R.A16F.07	BRCA	01	tumor	0.451463
TCGA.C8.A278.01A.11R.A169.07	BRCA	01	tumor	0.466998
TCGA.C8.A27A.01A.11R.A169.07	BRCA	01	tumor	0.580984
TCGA.C8.A27B.01A.11R.A169.07	BRCA	01	tumor	0.596413
TCGA.C8.A3M7.01A.12R.A21T.07	BRCA	01	tumor	0.403059
TCGA.C8.A3M8.01A.11R.A213.07	BRCA	01	tumor	0.426873
TCGA.C8.A8HP.01A.11R.A36F.07	BRCA	01	tumor	0.393014
TCGA.C8.A8HQ.01A.11R.A36F.07	BRCA	01	tumor	0.444777
TCGA.C8.A8HR.01A.11R.A36F.07	BRCA	01	tumor	0.381434
TCGA.D8.A13Y.01A.11R.A115.07	BRCA	01	tumor	0.709187
TCGA.D8.A13Z.01A.11R.A115.07	BRCA	01	tumor	0.471584
TCGA.D8.A140.01A.11R.A115.07	BRCA	01	tumor	0.42206
TCGA.D8.A141.01A.11R.A115.07	BRCA	01	tumor	0.334784
TCGA.D8.A142.01A.11R.A115.07	BRCA	01	tumor	0.383071
TCGA.D8.A143.01A.11R.A115.07	BRCA	01	tumor	0.512393
TCGA.D8.A145.01A.11R.A115.07	BRCA	01	tumor	0.407183
TCGA.D8.A147.01A.11R.A115.07	BRCA	01	tumor	0.528189
TCGA.D8.A1J8.01A.11R.A13Q.07	BRCA	01	tumor	0.554202
TCGA.D8.A1J9.01A.11R.A13Q.07	BRCA	01	tumor	0.386592
TCGA.D8.A1JA.01A.11R.A13Q.07	BRCA	01	tumor	0.336858
TCGA.D8.A1JB.01A.11R.A13Q.07	BRCA	01	tumor	0.218754
TCGA.D8.A1JC.01A.11R.A13Q.07	BRCA	01	tumor	0.443146
TCGA.D8.A1JD.01A.11R.A13Q.07	BRCA	01	tumor	0.482346
TCGA.D8.A1JE.01A.11R.A13Q.07	BRCA	01	tumor	0.43988
TCGA.D8.A1JF.01A.11R.A13Q.07	BRCA	01	tumor	0.500252
TCGA.D8.A1JG.01B.11R.A13Q.07	BRCA	01	tumor	0.44296
TCGA.D8.A1JH.01A.11R.A13Q.07	BRCA	01	tumor	0.331613
TCGA.D8.A1JI.01A.11R.A13Q.07	BRCA	01	tumor	0.327269
TCGA.D8.A1JJ.01A.31R.A14M.07	BRCA	01	tumor	0.486627
TCGA.D8.A1JK.01A.11R.A13Q.07	BRCA	01	tumor	0.424351
TCGA.D8.A1JL.01A.11R.A13Q.07	BRCA	01	tumor	0.488634
TCGA.D8.A1JM.01A.11R.A13Q.07	BRCA	01	tumor	0.58232
TCGA.D8.A1JN.01A.11R.A13Q.07	BRCA	01	tumor	0.366511
TCGA.D8.A1JP.01A.11R.A13Q.07	BRCA	01	tumor	0.374756
TCGA.D8.A1JS.01A.11R.A13Q.07	BRCA	01	tumor	0.408262
TCGA.D8.A1JT.01A.31R.A13Q.07	BRCA	01	tumor	0.457483
TCGA.D8.A1JU.01A.11R.A13Q.07	BRCA	01	tumor	0.191123
TCGA.D8.A1X5.01A.11R.A14D.07	BRCA	01	tumor	0.449712
TCGA.D8.A1X6.01A.11R.A14M.07	BRCA	01	tumor	0.472605
TCGA.D8.A1X7.01A.11R.A14M.07	BRCA	01	tumor	0.378625
TCGA.D8.A1X8.01A.11R.A14M.07	BRCA	01	tumor	0.423301
TCGA.D8.A1X9.01A.12R.A157.07	BRCA	01	tumor	0.366534
TCGA.D8.A1XA.01A.11R.A14D.07	BRCA	01	tumor	0.430155
TCGA.D8.A1XB.01A.11R.A14D.07	BRCA	01	tumor	0.399097
TCGA.D8.A1XC.01A.11R.A14D.07	BRCA	01	tumor	0.393611
TCGA.D8.A1XD.01A.11R.A14D.07	BRCA	01	tumor	0.375247
TCGA.D8.A1XF.01A.11R.A14D.07	BRCA	01	tumor	0.686031
TCGA.D8.A1XG.01A.11R.A14D.07	BRCA	01	tumor	0.48001
TCGA.D8.A1XJ.01A.11R.A14M.07	BRCA	01	tumor	0.492666
TCGA.D8.A1XK.01A.21R.A14M.07	BRCA	01	tumor	0.613026
TCGA.D8.A1XL.01A.11R.A14M.07	BRCA	01	tumor	0.58163
TCGA.D8.A1XM.01A.21R.A14M.07	BRCA	01	tumor	0.319302
TCGA.D8.A1XO.01A.11R.A14M.07	BRCA	01	tumor	0.427685
TCGA.D8.A1XQ.01A.11R.A14M.07	BRCA	01	tumor	0.462435
TCGA.D8.A1XR.01A.11R.A14M.07	BRCA	01	tumor	0.529571
TCGA.D8.A1XS.01A.11R.A14M.07	BRCA	01	tumor	0.466967
TCGA.D8.A1XT.01A.11R.A14M.07	BRCA	01	tumor	0.458421
TCGA.D8.A1XU.01A.11R.A14M.07	BRCA	01	tumor	0.268502
TCGA.D8.A1XV.01A.11R.A14M.07	BRCA	01	tumor	0.40711
TCGA.D8.A1XW.01A.11R.A14M.07	BRCA	01	tumor	0.28158
TCGA.D8.A1XY.01A.11R.A14M.07	BRCA	01	tumor	0.295216
TCGA.D8.A1XZ.01A.11R.A14M.07	BRCA	01	tumor	0.602631
TCGA.D8.A1Y0.01A.11R.A14M.07	BRCA	01	tumor	0.500855
TCGA.D8.A1Y1.01A.21R.A14M.07	BRCA	01	tumor	0.508568
TCGA.D8.A1Y2.01A.11R.A157.07	BRCA	01	tumor	0.397205
TCGA.D8.A1Y3.01A.11R.A157.07	BRCA	01	tumor	0.572763
TCGA.D8.A27E.01A.11R.A16F.07	BRCA	01	tumor	0.347783
TCGA.D8.A27F.01A.11R.A16F.07	BRCA	01	tumor	0.544229
TCGA.D8.A27G.01A.11R.A16F.07	BRCA	01	tumor	0.394737
TCGA.D8.A27H.01A.11R.A16F.07	BRCA	01	tumor	0.399906
TCGA.D8.A27I.01A.11R.A16F.07	BRCA	01	tumor	0.29507
TCGA.D8.A27K.01A.11R.A16F.07	BRCA	01	tumor	0.39976
TCGA.D8.A27L.01A.11R.A16F.07	BRCA	01	tumor	0.33305
TCGA.D8.A27M.01A.11R.A16F.07	BRCA	01	tumor	0.385674
TCGA.D8.A27N.01A.11R.A16F.07	BRCA	01	tumor	0.444773
TCGA.D8.A27P.01A.11R.A16F.07	BRCA	01	tumor	0.376576
TCGA.D8.A27R.01A.11R.A16F.07	BRCA	01	tumor	0.404305
TCGA.D8.A27T.01A.11R.A16F.07	BRCA	01	tumor	0.437468
TCGA.D8.A27V.01A.12R.A17B.07	BRCA	01	tumor	0.439269
TCGA.D8.A27W.01A.11R.A16F.07	BRCA	01	tumor	0.463447
TCGA.D8.A3Z5.01A.41R.A24H.07	BRCA	01	tumor	0.335823
TCGA.D8.A3Z6.01A.11R.A239.07	BRCA	01	tumor	0.398171
TCGA.D8.A4Z1.01A.21R.A266.07	BRCA	01	tumor	0.274885
TCGA.D8.A73U.01A.11R.A33J.07	BRCA	01	tumor	0.264769
TCGA.D8.A73W.01A.22R.A352.07	BRCA	01	tumor	0.295091
TCGA.D8.A73X.01A.11R.A32P.07	BRCA	01	tumor	0.374351
TCGA.E2.A105.01A.11R.A10J.07	BRCA	01	tumor	0.501912
TCGA.E2.A106.01A.11R.A10J.07	BRCA	01	tumor	0.338975
TCGA.E2.A107.01A.11R.A10J.07	BRCA	01	tumor	0.578961
TCGA.E2.A108.01A.13R.A10J.07	BRCA	01	tumor	0.269444
TCGA.E2.A109.01A.11R.A10J.07	BRCA	01	tumor	0.461816
TCGA.E2.A10A.01A.21R.A115.07	BRCA	01	tumor	0.525897
TCGA.E2.A10B.01A.11R.A10J.07	BRCA	01	tumor	0.393142
TCGA.E2.A10C.01A.21R.A10J.07	BRCA	01	tumor	0.450473
TCGA.E2.A10E.01A.21R.A10J.07	BRCA	01	tumor	0.425815
TCGA.E2.A10F.01A.11R.A10J.07	BRCA	01	tumor	0.397057
TCGA.E2.A14N.01A.31R.A137.07	BRCA	01	tumor	0.654099
TCGA.E2.A14O.01A.31R.A115.07	BRCA	01	tumor	0.471896
TCGA.E2.A14P.01A.31R.A12D.07	BRCA	01	tumor	0.478423
TCGA.E2.A14Q.01A.11R.A12D.07	BRCA	01	tumor	0.400946
TCGA.E2.A14R.01A.11R.A115.07	BRCA	01	tumor	0.481401
TCGA.E2.A14S.01A.11R.A12D.07	BRCA	01	tumor	0.532916
TCGA.E2.A14T.01A.11R.A115.07	BRCA	01	tumor	0.407692
TCGA.E2.A14U.01A.11R.A22K.07	BRCA	01	tumor	0.344684
TCGA.E2.A14V.01A.11R.A12D.07	BRCA	01	tumor	0.57598
TCGA.E2.A14W.01A.11R.A12D.07	BRCA	01	tumor	0.313911
TCGA.E2.A14X.01A.11R.A115.07	BRCA	01	tumor	0.448798
TCGA.E2.A14Y.01A.21R.A12D.07	BRCA	01	tumor	0.429411
TCGA.E2.A14Z.01A.11R.A115.07	BRCA	01	tumor	0.31896
TCGA.E2.A150.01A.11R.A12D.07	BRCA	01	tumor	0.328425
TCGA.E2.A152.01A.11R.A12D.07	BRCA	01	tumor	0.319264
TCGA.E2.A153.01A.12R.A12D.07	BRCA	01	tumor	0.327422
TCGA.E2.A154.01A.11R.A115.07	BRCA	01	tumor	0.492978
TCGA.E2.A155.01A.11R.A12D.07	BRCA	01	tumor	0.506725
TCGA.E2.A156.01A.11R.A12D.07	BRCA	01	tumor	0.400727
TCGA.E2.A158.01A.11R.A12D.07	BRCA	01	tumor	0.57411
TCGA.E2.A159.01A.11R.A115.07	BRCA	01	tumor	0.342188
TCGA.E2.A15A.01A.11R.A12D.07	BRCA	01	tumor	0.464262
TCGA.E2.A15A.06A.11R.A12D.07	BRCA	06	tumor	0.495903
TCGA.E2.A15C.01A.31R.A12D.07	BRCA	01	tumor	0.384166
TCGA.E2.A15D.01A.11R.A115.07	BRCA	01	tumor	0.345028
TCGA.E2.A15E.01A.11R.A12D.07	BRCA	01	tumor	0.287231
TCGA.E2.A15E.06A.11R.A12D.07	BRCA	06	tumor	0.376629
TCGA.E2.A15F.01A.11R.A115.07	BRCA	01	tumor	0.420531
TCGA.E2.A15G.01A.11R.A12D.07	BRCA	01	tumor	0.456922
TCGA.E2.A15H.01A.11R.A12D.07	BRCA	01	tumor	0.485606
TCGA.E2.A15I.01A.21R.A137.07	BRCA	01	tumor	0.3827
TCGA.E2.A15J.01A.11R.A12P.07	BRCA	01	tumor	0.490094
TCGA.E2.A15K.01A.11R.A12P.07	BRCA	01	tumor	0.549428
TCGA.E2.A15K.06A.11R.A12P.07	BRCA	06	tumor	0.582949
TCGA.E2.A15L.01A.11R.A12D.07	BRCA	01	tumor	0.539197
TCGA.E2.A15M.01A.11R.A12D.07	BRCA	01	tumor	0.405348
TCGA.E2.A15O.01A.11R.A115.07	BRCA	01	tumor	0.455837
TCGA.E2.A15P.01A.11R.A115.07	BRCA	01	tumor	0.332841
TCGA.E2.A15R.01A.11R.A115.07	BRCA	01	tumor	0.513844
TCGA.E2.A15S.01A.11R.A115.07	BRCA	01	tumor	0.604369
TCGA.E2.A15T.01A.11R.A115.07	BRCA	01	tumor	0.442583
TCGA.E2.A1AZ.01A.11R.A12P.07	BRCA	01	tumor	0.606749
TCGA.E2.A1B0.01A.11R.A12P.07	BRCA	01	tumor	0.514232
TCGA.E2.A1B1.01A.21R.A12P.07	BRCA	01	tumor	0.351977
TCGA.E2.A1B4.01A.11R.A12P.07	BRCA	01	tumor	0.386339
TCGA.E2.A1B5.01A.21R.A12P.07	BRCA	01	tumor	0.230193
TCGA.E2.A1B6.01A.31R.A12P.07	BRCA	01	tumor	0.44012
TCGA.E2.A1BC.01A.11R.A12P.07	BRCA	01	tumor	0.270475
TCGA.E2.A1BD.01A.11R.A12P.07	BRCA	01	tumor	0.471939
TCGA.E2.A1IE.01A.11R.A13Q.07	BRCA	01	tumor	0.40115
TCGA.E2.A1IF.01A.11R.A144.07	BRCA	01	tumor	0.358235
TCGA.E2.A1IG.01A.11R.A144.07	BRCA	01	tumor	0.377166
TCGA.E2.A1IH.01A.11R.A13Q.07	BRCA	01	tumor	0.301518
TCGA.E2.A1II.01A.11R.A144.07	BRCA	01	tumor	0.60826
TCGA.E2.A1IJ.01A.11R.A144.07	BRCA	01	tumor	0.205844
TCGA.E2.A1IK.01A.11R.A144.07	BRCA	01	tumor	0.340372
TCGA.E2.A1IL.01A.11R.A14D.07	BRCA	01	tumor	0.369881
TCGA.E2.A1IN.01A.11R.A13Q.07	BRCA	01	tumor	0.434346
TCGA.E2.A1IO.01A.11R.A144.07	BRCA	01	tumor	0.336358
TCGA.E2.A1IU.01A.11R.A14D.07	BRCA	01	tumor	0.417479
TCGA.E2.A1L6.01A.11R.A13Q.07	BRCA	01	tumor	0.365393
TCGA.E2.A1L7.01A.11R.A144.07	BRCA	01	tumor	0.448301
TCGA.E2.A1L8.01A.11R.A13Q.07	BRCA	01	tumor	0.282471
TCGA.E2.A1L9.01A.11R.A13Q.07	BRCA	01	tumor	0.358475
TCGA.E2.A1LA.01A.11R.A144.07	BRCA	01	tumor	0.401805
TCGA.E2.A1LB.01A.11R.A144.07	BRCA	01	tumor	0.302072
TCGA.E2.A1LE.01A.12R.A19W.07	BRCA	01	tumor	0.372053
TCGA.E2.A1LG.01A.21R.A14M.07	BRCA	01	tumor	0.538909
TCGA.E2.A1LH.01A.11R.A14D.07	BRCA	01	tumor	0.384592
TCGA.E2.A1LI.01A.12R.A157.07	BRCA	01	tumor	0.556413
TCGA.E2.A1LK.01A.21R.A14D.07	BRCA	01	tumor	0.495233
TCGA.E2.A1LL.01A.11R.A144.07	BRCA	01	tumor	0.34396
TCGA.E2.A1LS.01A.12R.A157.07	BRCA	01	tumor	0.319833
TCGA.E2.A2P5.01A.11R.A19W.07	BRCA	01	tumor	0.535898
TCGA.E2.A2P6.01A.11R.A19W.07	BRCA	01	tumor	0.466396
TCGA.E2.A3DX.01A.21R.A213.07	BRCA	01	tumor	0.275238
TCGA.E2.A56Z.01A.12R.A29R.07	BRCA	01	tumor	0.442212
TCGA.E2.A570.01A.11R.A29R.07	BRCA	01	tumor	0.321736
TCGA.E2.A572.01A.13R.A31O.07	BRCA	01	tumor	0.368574
TCGA.E2.A573.01A.11R.A29R.07	BRCA	01	tumor	0.490079
TCGA.E2.A574.01A.11R.A29R.07	BRCA	01	tumor	0.468808
TCGA.E2.A576.01A.11R.A31O.07	BRCA	01	tumor	0.483855
TCGA.E2.A9RU.01A.11R.A41B.07	BRCA	01	tumor	0.537151
TCGA.E9.A1N3.01A.12R.A157.07	BRCA	01	tumor	0.362927
TCGA.E9.A1N4.01A.11R.A14M.07	BRCA	01	tumor	0.43879
TCGA.E9.A1N5.01A.11R.A14D.07	BRCA	01	tumor	0.492432
TCGA.E9.A1N6.01A.11R.A144.07	BRCA	01	tumor	0.472028
TCGA.E9.A1N8.01A.11R.A144.07	BRCA	01	tumor	0.713841
TCGA.E9.A1N9.01A.11R.A14D.07	BRCA	01	tumor	0.47844
TCGA.E9.A1NA.01A.11R.A144.07	BRCA	01	tumor	0.414171
TCGA.E9.A1NC.01A.21R.A26B.07	BRCA	01	tumor	0.324152
TCGA.E9.A1ND.01A.11R.A144.07	BRCA	01	tumor	0.372928
TCGA.E9.A1NE.01A.21R.A14M.07	BRCA	01	tumor	0.39315
TCGA.E9.A1NF.01A.11R.A14D.07	BRCA	01	tumor	0.242794
TCGA.E9.A1NG.01A.21R.A14M.07	BRCA	01	tumor	0.338714
TCGA.E9.A1NH.01A.11R.A14D.07	BRCA	01	tumor	0.261731
TCGA.E9.A1NI.01A.11R.A14D.07	BRCA	01	tumor	0.413734
TCGA.E9.A1QZ.01A.21R.A169.07	BRCA	01	tumor	0.422959
TCGA.E9.A1R0.01A.22R.A16F.07	BRCA	01	tumor	0.415216
TCGA.E9.A1R2.01A.11R.A14D.07	BRCA	01	tumor	0.370165
TCGA.E9.A1R3.01A.31R.A14M.07	BRCA	01	tumor	0.250459
TCGA.E9.A1R4.01A.21R.A14D.07	BRCA	01	tumor	0.460785
TCGA.E9.A1R5.01A.11R.A14M.07	BRCA	01	tumor	0.377753
TCGA.E9.A1R6.01A.11R.A14D.07	BRCA	01	tumor	0.328521
TCGA.E9.A1R7.01A.11R.A14M.07	BRCA	01	tumor	0.372335
TCGA.E9.A1RA.01A.11R.A14D.07	BRCA	01	tumor	0.492803
TCGA.E9.A1RB.01A.11R.A157.07	BRCA	01	tumor	0.597998
TCGA.E9.A1RC.01A.11R.A157.07	BRCA	01	tumor	0.455247
TCGA.E9.A1RD.01A.11R.A157.07	BRCA	01	tumor	0.397161
TCGA.E9.A1RE.01A.11R.A157.07	BRCA	01	tumor	0.503774
TCGA.E9.A1RF.01A.11R.A157.07	BRCA	01	tumor	0.30835
TCGA.E9.A1RG.01A.11R.A14D.07	BRCA	01	tumor	0.491103
TCGA.E9.A1RH.01A.21R.A169.07	BRCA	01	tumor	0.451206
TCGA.E9.A1RI.01A.11R.A169.07	BRCA	01	tumor	0.369755
TCGA.E9.A226.01A.21R.A157.07	BRCA	01	tumor	0.578781
TCGA.E9.A227.01A.11R.A157.07	BRCA	01	tumor	0.327253
TCGA.E9.A228.01A.31R.A157.07	BRCA	01	tumor	0.585897
TCGA.E9.A229.01A.31R.A157.07	BRCA	01	tumor	0.413218
TCGA.E9.A22A.01A.11R.A157.07	BRCA	01	tumor	0.355556
TCGA.E9.A22B.01A.11R.A157.07	BRCA	01	tumor	0.274149
TCGA.E9.A22D.01A.11R.A157.07	BRCA	01	tumor	0.482241
TCGA.E9.A22E.01A.11R.A157.07	BRCA	01	tumor	0.255461
TCGA.E9.A22G.01A.11R.A157.07	BRCA	01	tumor	0.729013
TCGA.E9.A22H.01A.11R.A157.07	BRCA	01	tumor	0.515509
TCGA.E9.A243.01A.21R.A169.07	BRCA	01	tumor	0.461051
TCGA.E9.A244.01A.11R.A169.07	BRCA	01	tumor	0.53946
TCGA.E9.A245.01A.22R.A16F.07	BRCA	01	tumor	0.314272
TCGA.E9.A247.01A.11R.A169.07	BRCA	01	tumor	0.561448
TCGA.E9.A248.01A.11R.A169.07	BRCA	01	tumor	0.468078
TCGA.E9.A249.01A.11R.A169.07	BRCA	01	tumor	0.473666
TCGA.E9.A24A.01A.11R.A169.07	BRCA	01	tumor	0.369793
TCGA.E9.A295.01A.11R.A16F.07	BRCA	01	tumor	0.357537
TCGA.E9.A2JS.01A.11R.A180.07	BRCA	01	tumor	0.437986
TCGA.E9.A2JT.01A.22R.A18M.07	BRCA	01	tumor	0.380301
TCGA.E9.A3HO.01A.11R.A213.07	BRCA	01	tumor	0.562758
TCGA.E9.A3Q9.01A.11R.A21T.07	BRCA	01	tumor	0.296823
TCGA.E9.A3QA.01A.61R.A22K.07	BRCA	01	tumor	0.516953
TCGA.E9.A3X8.01A.31R.A22U.07	BRCA	01	tumor	0.310197
TCGA.E9.A54X.01A.11R.A266.07	BRCA	01	tumor	0.492112
TCGA.E9.A54Y.01A.11R.A466.07	BRCA	01	tumor	0.573966
TCGA.E9.A5FK.01A.11R.A27Q.07	BRCA	01	tumor	0.271815
TCGA.E9.A5FL.01A.11R.A27Q.07	BRCA	01	tumor	0.342046
TCGA.E9.A5UO.01A.11R.A28M.07	BRCA	01	tumor	0.546208
TCGA.E9.A5UP.01A.11R.A28M.07	BRCA	01	tumor	0.322157
TCGA.E9.A6HE.01A.11R.A31O.07	BRCA	01	tumor	0.43516
TCGA.EW.A1IW.01A.11R.A13Q.07	BRCA	01	tumor	0.477766
TCGA.EW.A1IX.01A.12R.A144.07	BRCA	01	tumor	0.348591
TCGA.EW.A1IY.01A.11R.A13Q.07	BRCA	01	tumor	0.450305
TCGA.EW.A1IZ.01A.11R.A13Q.07	BRCA	01	tumor	0.452081
TCGA.EW.A1J1.01A.11R.A13Q.07	BRCA	01	tumor	0.441866
TCGA.EW.A1J2.01A.21R.A13Q.07	BRCA	01	tumor	0.235202
TCGA.EW.A1J3.01A.11R.A13Q.07	BRCA	01	tumor	0.539389
TCGA.EW.A1J5.01A.11R.A13Q.07	BRCA	01	tumor	0.416285
TCGA.EW.A1J6.01A.11R.A13Q.07	BRCA	01	tumor	0.426782
TCGA.EW.A1OV.01A.11R.A144.07	BRCA	01	tumor	0.430748
TCGA.EW.A1OW.01A.21R.A144.07	BRCA	01	tumor	0.522121
TCGA.EW.A1OX.01A.11R.A144.07	BRCA	01	tumor	0.477196
TCGA.EW.A1OY.01A.11R.A144.07	BRCA	01	tumor	0.388662
TCGA.EW.A1OZ.01A.11R.A144.07	BRCA	01	tumor	0.526442
TCGA.EW.A1P0.01A.11R.A144.07	BRCA	01	tumor	0.405742
TCGA.EW.A1P1.01A.31R.A14D.07	BRCA	01	tumor	0.290505
TCGA.EW.A1P3.01A.11R.A144.07	BRCA	01	tumor	0.404485
TCGA.EW.A1P4.01A.21R.A144.07	BRCA	01	tumor	0.43296
TCGA.EW.A1P5.01A.11R.A144.07	BRCA	01	tumor	0.480362
TCGA.EW.A1P6.01A.11R.A144.07	BRCA	01	tumor	0.480513
TCGA.EW.A1P7.01A.21R.A144.07	BRCA	01	tumor	0.276686
TCGA.EW.A1P8.01A.11R.A144.07	BRCA	01	tumor	0.500633
TCGA.EW.A1PA.01A.11R.A144.07	BRCA	01	tumor	0.452774
TCGA.EW.A1PB.01A.11R.A144.07	BRCA	01	tumor	0.502801
TCGA.EW.A1PC.01B.11R.A21T.07	BRCA	01	tumor	0.700272
TCGA.EW.A1PD.01A.11R.A144.07	BRCA	01	tumor	0.424904
TCGA.EW.A1PE.01A.11R.A144.07	BRCA	01	tumor	0.342815
TCGA.EW.A1PF.01A.11R.A144.07	BRCA	01	tumor	0.33043
TCGA.EW.A1PG.01A.11R.A144.07	BRCA	01	tumor	0.283583
TCGA.EW.A1PH.01A.11R.A14M.07	BRCA	01	tumor	0.495561
TCGA.EW.A2FR.01A.11R.A21T.07	BRCA	01	tumor	0.330638
TCGA.EW.A2FS.01A.11R.A17B.07	BRCA	01	tumor	0.374705
TCGA.EW.A2FV.01A.11R.A17B.07	BRCA	01	tumor	0.417536
TCGA.EW.A2FW.01A.11R.A17B.07	BRCA	01	tumor	0.692266
TCGA.EW.A3E8.01B.11R.A24H.07	BRCA	01	tumor	0.388462
TCGA.EW.A3U0.01A.11R.A22K.07	BRCA	01	tumor	0.475878
TCGA.EW.A423.01A.11R.A24H.07	BRCA	01	tumor	0.474065
TCGA.EW.A424.01A.11R.A24H.07	BRCA	01	tumor	0.431285
TCGA.EW.A6S9.01A.22R.A33J.07	BRCA	01	tumor	0.405521
TCGA.EW.A6SA.01A.21R.A32P.07	BRCA	01	tumor	0.5892
TCGA.EW.A6SB.01A.12R.A32P.07	BRCA	01	tumor	0.541749
TCGA.EW.A6SC.01A.12R.A32P.07	BRCA	01	tumor	0.471386
TCGA.EW.A6SD.01A.12R.A33J.07	BRCA	01	tumor	0.424118
TCGA.GI.A2C8.01A.11R.A16F.07	BRCA	01	tumor	0.170398
TCGA.GI.A2C9.01A.11R.A21T.07	BRCA	01	tumor	0.358696
TCGA.GM.A2D9.01A.11R.A18M.07	BRCA	01	tumor	0.219845
TCGA.GM.A2DA.01A.11R.A18M.07	BRCA	01	tumor	0.365578
TCGA.GM.A2DB.01A.31R.A18M.07	BRCA	01	tumor	0.44021
TCGA.GM.A2DC.01A.11R.A18M.07	BRCA	01	tumor	0.349343
TCGA.GM.A2DD.01A.11R.A180.07	BRCA	01	tumor	0.328363
TCGA.GM.A2DF.01A.11R.A180.07	BRCA	01	tumor	0.423141
TCGA.GM.A2DH.01A.11R.A180.07	BRCA	01	tumor	0.62915
TCGA.GM.A2DI.01A.31R.A18M.07	BRCA	01	tumor	0.328819
TCGA.GM.A2DK.01A.21R.A180.07	BRCA	01	tumor	0.294016
TCGA.GM.A2DL.01A.11R.A18M.07	BRCA	01	tumor	0.41119
TCGA.GM.A2DM.01A.11R.A180.07	BRCA	01	tumor	0.387819
TCGA.GM.A2DN.01A.11R.A180.07	BRCA	01	tumor	0.382368
TCGA.GM.A2DO.01A.11R.A18M.07	BRCA	01	tumor	0.409419
TCGA.GM.A3NW.01A.21R.A22K.07	BRCA	01	tumor	0.408948
TCGA.GM.A3NY.01A.11R.A21T.07	BRCA	01	tumor	0.413055
TCGA.GM.A3XG.01A.31R.A24H.07	BRCA	01	tumor	0.312209
TCGA.GM.A3XL.01A.11R.A22U.07	BRCA	01	tumor	0.661498
TCGA.GM.A3XN.01A.12R.A22U.07	BRCA	01	tumor	0.383664
TCGA.GM.A4E0.01A.12R.A266.07	BRCA	01	tumor	0.223019
TCGA.GM.A5PV.01A.11R.A28M.07	BRCA	01	tumor	0.263211
TCGA.GM.A5PX.01A.12R.A28M.07	BRCA	01	tumor	0.239754
TCGA.HN.A2NL.01A.11R.A18M.07	BRCA	01	tumor	0.702516
TCGA.HN.A2OB.01A.21R.A27Q.07	BRCA	01	tumor	0.265973
TCGA.JL.A3YW.01A.12R.A239.07	BRCA	01	tumor	0.316877
TCGA.JL.A3YX.01A.11R.A22U.07	BRCA	01	tumor	0.544789
TCGA.LD.A66U.01A.11R.A31O.07	BRCA	01	tumor	0.320061
TCGA.LD.A74U.01A.13R.A33J.07	BRCA	01	tumor	0.321242
TCGA.LD.A7W5.01A.22R.A352.07	BRCA	01	tumor	0.417729
TCGA.LD.A7W6.01A.81R.A352.07	BRCA	01	tumor	0.446625
TCGA.LD.A9QF.01A.32R.A41B.07	BRCA	01	tumor	0.310077
TCGA.LL.A440.01A.11R.A24H.07	BRCA	01	tumor	0.254589
TCGA.LL.A441.01A.11R.A24H.07	BRCA	01	tumor	0.460882
TCGA.LL.A442.01A.11R.A24H.07	BRCA	01	tumor	0.438001
TCGA.LL.A50Y.01A.11R.A266.07	BRCA	01	tumor	0.388532
TCGA.LL.A5YL.01A.12R.A29R.07	BRCA	01	tumor	0.368639
TCGA.LL.A5YM.01A.11R.A28M.07	BRCA	01	tumor	0.404835
TCGA.LL.A5YN.01A.11R.A28M.07	BRCA	01	tumor	0.382693
TCGA.LL.A5YO.01A.21R.A28M.07	BRCA	01	tumor	0.419426
TCGA.LL.A5YP.01A.21R.A28M.07	BRCA	01	tumor	0.357261
TCGA.LL.A6FP.01A.11R.A31O.07	BRCA	01	tumor	0.432298
TCGA.LL.A6FQ.01A.11R.A31O.07	BRCA	01	tumor	0.386452
TCGA.LL.A6FR.01A.12R.A31O.07	BRCA	01	tumor	0.449584
TCGA.LL.A73Y.01A.11R.A33J.07	BRCA	01	tumor	0.397341
TCGA.LL.A73Z.01A.11R.A32P.07	BRCA	01	tumor	0.374204
TCGA.LL.A740.01A.21R.A32P.07	BRCA	01	tumor	0.254629
TCGA.LL.A7SZ.01A.32R.A352.07	BRCA	01	tumor	0.404589
TCGA.LL.A7T0.01A.31R.A352.07	BRCA	01	tumor	0.528341
TCGA.LL.A8F5.01A.11R.A36F.07	BRCA	01	tumor	0.40574
TCGA.LL.A9Q3.01A.11R.A41B.07	BRCA	01	tumor	0.372853
TCGA.LQ.A4E4.01A.11R.A266.07	BRCA	01	tumor	0.486416
TCGA.MS.A51U.01A.31R.A266.07	BRCA	01	tumor	0.229959
TCGA.OK.A5Q2.01A.11R.A27Q.07	BRCA	01	tumor	0.424968
TCGA.OL.A5D6.01A.21R.A27Q.07	BRCA	01	tumor	0.286027
TCGA.OL.A5D7.01A.11R.A27Q.07	BRCA	01	tumor	0.688969
TCGA.OL.A5D8.01A.11R.A27Q.07	BRCA	01	tumor	0.389443
TCGA.OL.A5DA.01A.11R.A27Q.07	BRCA	01	tumor	0.369347
TCGA.OL.A5RU.01A.11R.A28M.07	BRCA	01	tumor	0.326217
TCGA.OL.A5RV.01A.12R.A28M.07	BRCA	01	tumor	0.289601
TCGA.OL.A5RW.01A.11R.A28M.07	BRCA	01	tumor	0.521909
TCGA.OL.A5RX.01A.11R.A28M.07	BRCA	01	tumor	0.311629
TCGA.OL.A5RY.01A.21R.A28M.07	BRCA	01	tumor	0.28358
TCGA.OL.A5RZ.01A.11R.A28M.07	BRCA	01	tumor	0.500169
TCGA.OL.A5S0.01A.11R.A28M.07	BRCA	01	tumor	0.478039
TCGA.OL.A66H.01A.11R.A29R.07	BRCA	01	tumor	0.400139
TCGA.OL.A66I.01A.21R.A29R.07	BRCA	01	tumor	0.484372
TCGA.OL.A66J.01A.11R.A29R.07	BRCA	01	tumor	0.361814
TCGA.OL.A66K.01A.11R.A29R.07	BRCA	01	tumor	0.347614
TCGA.OL.A66L.01A.12R.A31O.07	BRCA	01	tumor	0.276269
TCGA.OL.A66N.01A.12R.A31O.07	BRCA	01	tumor	0.280994
TCGA.OL.A66O.01A.11R.A31O.07	BRCA	01	tumor	0.61235
TCGA.OL.A66P.01A.11R.A31O.07	BRCA	01	tumor	0.291815
TCGA.OL.A6VO.01A.12R.A33J.07	BRCA	01	tumor	0.640016
TCGA.OL.A6VQ.01A.12R.A41B.07	BRCA	01	tumor	0.263434
TCGA.OL.A6VR.01A.32R.A33J.07	BRCA	01	tumor	0.434154
TCGA.OL.A97C.01A.32R.A41B.07	BRCA	01	tumor	0.399449
TCGA.PE.A5DC.01A.12R.A27Q.07	BRCA	01	tumor	0.430017
TCGA.PE.A5DD.01A.12R.A27Q.07	BRCA	01	tumor	0.457687
TCGA.PE.A5DE.01A.11R.A27Q.07	BRCA	01	tumor	0.400731
TCGA.PL.A8LV.01A.21R.A41B.07	BRCA	01	tumor	0.449658
TCGA.PL.A8LX.01A.11R.A41B.07	BRCA	01	tumor	0.328774
TCGA.PL.A8LY.01A.11R.A41B.07	BRCA	01	tumor	0.414276
TCGA.PL.A8LZ.01A.31R.A36F.07	BRCA	01	tumor	0.434413
TCGA.S3.A6ZF.01A.32R.A32P.07	BRCA	01	tumor	0.441888
TCGA.S3.A6ZG.01A.22R.A32P.07	BRCA	01	tumor	0.467008
TCGA.S3.A6ZH.01A.22R.A32P.07	BRCA	01	tumor	0.565207
TCGA.S3.AA0Z.01A.11R.A41B.07	BRCA	01	tumor	0.400949
TCGA.S3.AA10.01A.21R.A41B.07	BRCA	01	tumor	0.495355
TCGA.S3.AA11.01A.31R.A41B.07	BRCA	01	tumor	0.525141
TCGA.S3.AA12.01A.11R.A41B.07	BRCA	01	tumor	0.503255
TCGA.S3.AA14.01A.11R.A41B.07	BRCA	01	tumor	0.403593
TCGA.S3.AA15.01A.11R.A41B.07	BRCA	01	tumor	0.386198
TCGA.S3.AA17.01A.11R.A41B.07	BRCA	01	tumor	0.465113
TCGA.UL.AAZ6.01A.11R.A41B.07	BRCA	01	tumor	0.51378
TCGA.UU.A93S.01A.21R.A41B.07	BRCA	01	tumor	0.438839
TCGA.V7.A7HQ.01A.11R.A33J.07	BRCA	01	tumor	0.36363
TCGA.W8.A86G.01A.21R.A36F.07	BRCA	01	tumor	0.304959
TCGA.WT.AB41.01A.11R.A41B.07	BRCA	01	tumor	0.310661
TCGA.WT.AB44.01A.11R.A41B.07	BRCA	01	tumor	0.299724
TCGA.XX.A899.01A.11R.A36F.07	BRCA	01	tumor	0.358642
TCGA.XX.A89A.01A.11R.A36F.07	BRCA	01	tumor	0.349121
TCGA.Z7.A8R5.01A.42R.A41B.07	BRCA	01	tumor	0.257338
TCGA.Z7.A8R6.01A.11R.A41B.07	BRCA	01	tumor	0.65328
TCGA.FU.A3EO.11A.13R.A213.07	CESC	11	normal	0.240605
TCGA.HM.A3JJ.11A.12R.A21T.07	CESC	11	normal	0.16081
TCGA.MY.A5BF.11A.11R.A26T.07	CESC	11	normal	0.152154
TCGA.2W.A8YY.01A.11R.A37O.07	CESC	01	tumor	0.601802
TCGA.4J.AA1J.01A.21R.A38B.07	CESC	01	tumor	0.674141
TCGA.BI.A0VR.01A.11R.A10U.07	CESC	01	tumor	0.598963
TCGA.BI.A0VS.01A.11R.A10U.07	CESC	01	tumor	0.490722
TCGA.BI.A20A.01A.11R.A14Y.07	CESC	01	tumor	0.517515
TCGA.C5.A0TN.01A.21R.A14Y.07	CESC	01	tumor	0.621625
TCGA.C5.A1BE.01B.11R.A13Y.07	CESC	01	tumor	0.575563
TCGA.C5.A1BF.01B.11R.A13Y.07	CESC	01	tumor	0.434123
TCGA.C5.A1BI.01B.11R.A13Y.07	CESC	01	tumor	0.577874
TCGA.C5.A1BJ.01A.11R.A13Y.07	CESC	01	tumor	0.622478
TCGA.C5.A1BK.01B.11R.A13Y.07	CESC	01	tumor	0.550063
TCGA.C5.A1BL.01A.11R.A13Y.07	CESC	01	tumor	0.70647
TCGA.C5.A1BM.01A.11R.A13Y.07	CESC	01	tumor	0.523241
TCGA.C5.A1BN.01B.11R.A14Y.07	CESC	01	tumor	0.69247
TCGA.C5.A1BQ.01C.11R.A213.07	CESC	01	tumor	0.599391
TCGA.C5.A1M5.01A.11R.A13Y.07	CESC	01	tumor	0.688749
TCGA.C5.A1M6.01A.11R.A13Y.07	CESC	01	tumor	0.646498
TCGA.C5.A1M7.01A.11R.A13Y.07	CESC	01	tumor	0.716484
TCGA.C5.A1M8.01A.21R.A13Y.07	CESC	01	tumor	0.63684
TCGA.C5.A1M9.01A.11R.A13Y.07	CESC	01	tumor	0.675627
TCGA.C5.A1ME.01A.11R.A13Y.07	CESC	01	tumor	0.538367
TCGA.C5.A1MF.01A.11R.A13Y.07	CESC	01	tumor	0.563465
TCGA.C5.A1MH.01A.11R.A14Y.07	CESC	01	tumor	0.552595
TCGA.C5.A1MI.01A.11R.A14Y.07	CESC	01	tumor	0.605596
TCGA.C5.A1MJ.01A.11R.A14Y.07	CESC	01	tumor	0.696453
TCGA.C5.A1MK.01A.11R.A14Y.07	CESC	01	tumor	0.635028
TCGA.C5.A1ML.01A.11R.A14Y.07	CESC	01	tumor	0.465334
TCGA.C5.A1MN.01A.11R.A14Y.07	CESC	01	tumor	0.555879
TCGA.C5.A1MP.01A.11R.A14Y.07	CESC	01	tumor	0.605072
TCGA.C5.A1MQ.01A.11R.A14Y.07	CESC	01	tumor	0.414145
TCGA.C5.A2LS.01A.22R.A22U.07	CESC	01	tumor	0.5767
TCGA.C5.A2LT.01A.11R.A18M.07	CESC	01	tumor	0.49782
TCGA.C5.A2LV.01A.11R.A18M.07	CESC	01	tumor	0.567973
TCGA.C5.A2LX.01A.11R.A18M.07	CESC	01	tumor	0.596782
TCGA.C5.A2LY.01A.31R.A18M.07	CESC	01	tumor	0.535955
TCGA.C5.A2LZ.01A.11R.A213.07	CESC	01	tumor	0.669207
TCGA.C5.A2M1.01A.11R.A18M.07	CESC	01	tumor	0.70255
TCGA.C5.A2M2.01A.21R.A18M.07	CESC	01	tumor	0.644288
TCGA.C5.A3HD.01B.11R.A213.07	CESC	01	tumor	0.644704
TCGA.C5.A3HE.01A.21R.A22U.07	CESC	01	tumor	0.573448
TCGA.C5.A3HF.01A.11R.A213.07	CESC	01	tumor	0.672019
TCGA.C5.A3HL.01A.11R.A213.07	CESC	01	tumor	0.433013
TCGA.C5.A7CG.01A.11R.A32P.07	CESC	01	tumor	0.574455
TCGA.C5.A7CH.01A.11R.A33Z.07	CESC	01	tumor	0.556132
TCGA.C5.A7CJ.01A.11R.A32P.07	CESC	01	tumor	0.521635
TCGA.C5.A7CK.01A.11R.A32P.07	CESC	01	tumor	0.587619
TCGA.C5.A7CL.01A.11R.A32P.07	CESC	01	tumor	0.592169
TCGA.C5.A7CM.01A.11R.A33Z.07	CESC	01	tumor	0.540028
TCGA.C5.A7CO.01A.11R.A352.07	CESC	01	tumor	0.597695
TCGA.C5.A7UC.01A.11R.A352.07	CESC	01	tumor	0.726737
TCGA.C5.A7UE.01A.11R.A33Z.07	CESC	01	tumor	0.657398
TCGA.C5.A7UH.01A.11R.A352.07	CESC	01	tumor	0.723828
TCGA.C5.A7UI.01A.11R.A36F.07	CESC	01	tumor	0.65325
TCGA.C5.A7X3.01A.11R.A352.07	CESC	01	tumor	0.598992
TCGA.C5.A7X5.01A.11R.A36F.07	CESC	01	tumor	0.468799
TCGA.C5.A7X8.01A.11R.A36F.07	CESC	01	tumor	0.480261
TCGA.C5.A7XC.01A.11R.A38B.07	CESC	01	tumor	0.536484
TCGA.C5.A8XH.01A.11R.A37O.07	CESC	01	tumor	0.548998
TCGA.C5.A8XI.01A.11R.A37O.07	CESC	01	tumor	0.600603
TCGA.C5.A8XJ.01A.11R.A37O.07	CESC	01	tumor	0.594576
TCGA.C5.A8XK.01A.11R.A37O.07	CESC	01	tumor	0.634674
TCGA.C5.A8YQ.01A.11R.A37O.07	CESC	01	tumor	0.569894
TCGA.C5.A8YR.01A.12R.A37O.07	CESC	01	tumor	0.706609
TCGA.C5.A8YT.01A.11R.A37O.07	CESC	01	tumor	0.485519
TCGA.C5.A8ZZ.01A.11R.A37O.07	CESC	01	tumor	0.657807
TCGA.C5.A901.01A.11R.A37O.07	CESC	01	tumor	0.481902
TCGA.C5.A902.01A.11R.A37O.07	CESC	01	tumor	0.606346
TCGA.C5.A905.01A.11R.A37O.07	CESC	01	tumor	0.690435
TCGA.C5.A907.01A.11R.A37O.07	CESC	01	tumor	0.584007
TCGA.DG.A2KJ.01A.11R.A32Y.07	CESC	01	tumor	0.458756
TCGA.DG.A2KK.01A.11R.A180.07	CESC	01	tumor	0.60917
TCGA.DG.A2KL.01A.11R.A180.07	CESC	01	tumor	0.587515
TCGA.DG.A2KM.01A.11R.A180.07	CESC	01	tumor	0.468644
TCGA.DR.A0ZL.01A.11R.A10U.07	CESC	01	tumor	0.715462
TCGA.DR.A0ZM.01A.12R.A10U.07	CESC	01	tumor	0.461729
TCGA.DS.A0VK.01A.21R.A10U.07	CESC	01	tumor	0.529579
TCGA.DS.A0VL.01A.21R.A10U.07	CESC	01	tumor	0.499735
TCGA.DS.A0VM.01A.11R.A10U.07	CESC	01	tumor	0.622934
TCGA.DS.A0VN.01A.21R.A10U.07	CESC	01	tumor	0.617671
TCGA.DS.A1O9.01A.11R.A14Y.07	CESC	01	tumor	0.504725
TCGA.DS.A1OA.01A.11R.A14Y.07	CESC	01	tumor	0.572208
TCGA.DS.A1OB.01A.11R.A14Y.07	CESC	01	tumor	0.774548
TCGA.DS.A1OC.01A.11R.A14Y.07	CESC	01	tumor	0.545624
TCGA.DS.A1OD.01A.11R.A14Y.07	CESC	01	tumor	0.674634
TCGA.DS.A3LQ.01A.21R.A21T.07	CESC	01	tumor	0.56445
TCGA.DS.A5RQ.01A.11R.A28H.07	CESC	01	tumor	0.517663
TCGA.DS.A7WF.01A.11R.A352.07	CESC	01	tumor	0.613149
TCGA.DS.A7WH.01A.22R.A352.07	CESC	01	tumor	0.563796
TCGA.DS.A7WI.01A.12R.A352.07	CESC	01	tumor	0.607
TCGA.EA.A1QS.01A.61R.A22U.07	CESC	01	tumor	0.41741
TCGA.EA.A1QT.01A.11R.A14Y.07	CESC	01	tumor	0.734445
TCGA.EA.A3HQ.01A.11R.A213.07	CESC	01	tumor	0.662473
TCGA.EA.A3HR.01A.11R.A213.07	CESC	01	tumor	0.601358
TCGA.EA.A3HS.01A.11R.A213.07	CESC	01	tumor	0.661148
TCGA.EA.A3HT.01A.61R.A21T.07	CESC	01	tumor	0.4477
TCGA.EA.A3HU.01A.11R.A213.07	CESC	01	tumor	0.56082
TCGA.EA.A3QD.01A.32R.A22U.07	CESC	01	tumor	0.577587
TCGA.EA.A3QE.01A.21R.A21T.07	CESC	01	tumor	0.516586
TCGA.EA.A3Y4.01A.51R.A24H.07	CESC	01	tumor	0.683751
TCGA.EA.A410.01A.11R.A32Y.07	CESC	01	tumor	0.703617
TCGA.EA.A411.01A.11R.A24H.07	CESC	01	tumor	0.598573
TCGA.EA.A439.01A.11R.A24H.07	CESC	01	tumor	0.607919
TCGA.EA.A43B.01A.81R.A32Y.07	CESC	01	tumor	0.542283
TCGA.EA.A44S.01A.12R.A26T.07	CESC	01	tumor	0.681044
TCGA.EA.A4BA.01A.21R.A26T.07	CESC	01	tumor	0.514842
TCGA.EA.A50E.01A.21R.A26T.07	CESC	01	tumor	0.549828
TCGA.EA.A556.01A.11R.A26T.07	CESC	01	tumor	0.457599
TCGA.EA.A5FO.01A.21R.A28H.07	CESC	01	tumor	0.722476
TCGA.EA.A5O9.01A.11R.A28H.07	CESC	01	tumor	0.593709
TCGA.EA.A5ZD.01A.11R.A28H.07	CESC	01	tumor	0.599086
TCGA.EA.A5ZE.01A.11R.A28H.07	CESC	01	tumor	0.569322
TCGA.EA.A5ZF.01A.11R.A28H.07	CESC	01	tumor	0.635859
TCGA.EA.A6QX.01A.12R.A33Z.07	CESC	01	tumor	0.629552
TCGA.EA.A78R.01A.11R.A32P.07	CESC	01	tumor	0.605213
TCGA.EA.A97N.01A.11R.A38B.07	CESC	01	tumor	0.667507
TCGA.EK.A2GZ.01A.11R.A180.07	CESC	01	tumor	0.491186
TCGA.EK.A2H0.01A.11R.A180.07	CESC	01	tumor	0.690897
TCGA.EK.A2H1.01A.11R.A180.07	CESC	01	tumor	0.493791
TCGA.EK.A2IP.01A.11R.A180.07	CESC	01	tumor	0.562722
TCGA.EK.A2IR.01A.11R.A180.07	CESC	01	tumor	0.853968
TCGA.EK.A2PG.01A.11R.A18M.07	CESC	01	tumor	0.689686
TCGA.EK.A2PI.01A.11R.A18M.07	CESC	01	tumor	0.673546
TCGA.EK.A2PK.01A.11R.A18M.07	CESC	01	tumor	0.599242
TCGA.EK.A2PL.01A.11R.A18M.07	CESC	01	tumor	0.55197
TCGA.EK.A2PM.01A.11R.A18M.07	CESC	01	tumor	0.611066
TCGA.EK.A2R7.01A.11R.A18M.07	CESC	01	tumor	0.690653
TCGA.EK.A2R8.01A.21R.A18M.07	CESC	01	tumor	0.657641
TCGA.EK.A2R9.01A.11R.A18M.07	CESC	01	tumor	0.527671
TCGA.EK.A2RA.01A.11R.A18M.07	CESC	01	tumor	0.652951
TCGA.EK.A2RB.01A.11R.A18M.07	CESC	01	tumor	0.653726
TCGA.EK.A2RC.01A.11R.A18M.07	CESC	01	tumor	0.544038
TCGA.EK.A2RE.01A.11R.A18M.07	CESC	01	tumor	0.513583
TCGA.EK.A2RJ.01A.11R.A18M.07	CESC	01	tumor	0.629223
TCGA.EK.A2RK.01A.11R.A18M.07	CESC	01	tumor	0.591452
TCGA.EK.A2RL.01A.11R.A18M.07	CESC	01	tumor	0.675194
TCGA.EK.A2RM.01A.21R.A18M.07	CESC	01	tumor	0.51258
TCGA.EK.A2RN.01A.12R.A213.07	CESC	01	tumor	0.495144
TCGA.EK.A2RO.01A.11R.A18M.07	CESC	01	tumor	0.547961
TCGA.EK.A3GJ.01A.21R.A213.07	CESC	01	tumor	0.786451
TCGA.EK.A3GK.01A.11R.A213.07	CESC	01	tumor	0.650199
TCGA.EK.A3GM.01A.11R.A213.07	CESC	01	tumor	0.607622
TCGA.EK.A3GN.01A.11R.A213.07	CESC	01	tumor	0.669362
TCGA.EX.A1H5.01A.31R.A13Y.07	CESC	01	tumor	0.662198
TCGA.EX.A1H6.01B.11R.A22U.07	CESC	01	tumor	0.506816
TCGA.EX.A3L1.01A.11R.A32Y.07	CESC	01	tumor	0.451802
TCGA.EX.A69L.01A.11R.A32P.07	CESC	01	tumor	0.506248
TCGA.EX.A69M.01A.11R.A32P.07	CESC	01	tumor	0.640871
TCGA.EX.A8YF.01A.11R.A37O.07	CESC	01	tumor	0.625472
TCGA.FU.A23K.01A.11R.A16R.07	CESC	01	tumor	0.576976
TCGA.FU.A23L.01A.11R.A16R.07	CESC	01	tumor	0.577967
TCGA.FU.A2QG.01A.11R.A18M.07	CESC	01	tumor	0.599063
TCGA.FU.A3EO.01A.11R.A213.07	CESC	01	tumor	0.489504
TCGA.FU.A3HY.01A.11R.A21T.07	CESC	01	tumor	0.715105
TCGA.FU.A3HZ.01A.11R.A213.07	CESC	01	tumor	0.527184
TCGA.FU.A3NI.01A.11R.A21T.07	CESC	01	tumor	0.619711
TCGA.FU.A3TQ.01A.11R.A22U.07	CESC	01	tumor	0.470335
TCGA.FU.A3TX.01A.11R.A22U.07	CESC	01	tumor	0.637684
TCGA.FU.A3WB.01A.11R.A22U.07	CESC	01	tumor	0.663282
TCGA.FU.A3YQ.01A.11R.A22U.07	CESC	01	tumor	0.558199
TCGA.FU.A40J.01A.11R.A24H.07	CESC	01	tumor	0.563574
TCGA.FU.A57G.01A.11R.A26T.07	CESC	01	tumor	0.419523
TCGA.FU.A5XV.01A.11R.A28H.07	CESC	01	tumor	0.615742
TCGA.FU.A770.01A.11R.A33Z.07	CESC	01	tumor	0.570716
TCGA.GH.A9DA.01A.21R.A37O.07	CESC	01	tumor	0.734377
TCGA.HG.A2PA.01A.11R.A213.07	CESC	01	tumor	0.505865
TCGA.HM.A3JJ.01A.21R.A21T.07	CESC	01	tumor	0.507587
TCGA.HM.A3JK.01A.11R.A32Y.07	CESC	01	tumor	0.554609
TCGA.HM.A4S6.01A.11R.A26T.07	CESC	01	tumor	0.67555
TCGA.HM.A6W2.01A.21R.A33Z.07	CESC	01	tumor	0.579984
TCGA.HM.A6W2.06A.22R.A33Z.07	CESC	06	tumor	0.587581
TCGA.IR.A3L7.01A.21R.A213.07	CESC	01	tumor	0.619406
TCGA.IR.A3LA.01A.11R.A22U.07	CESC	01	tumor	0.569906
TCGA.IR.A3LB.01A.11R.A24H.07	CESC	01	tumor	0.407693
TCGA.IR.A3LC.01A.11R.A213.07	CESC	01	tumor	0.644354
TCGA.IR.A3LF.01A.21R.A22U.07	CESC	01	tumor	0.599514
TCGA.IR.A3LH.01A.21R.A213.07	CESC	01	tumor	0.457152
TCGA.IR.A3LI.01A.11R.A32Y.07	CESC	01	tumor	0.479708
TCGA.IR.A3LK.01A.12R.A213.07	CESC	01	tumor	0.7592
TCGA.IR.A3LL.01A.11R.A213.07	CESC	01	tumor	0.514533
TCGA.JW.A5VG.01A.11R.A28H.07	CESC	01	tumor	0.604855
TCGA.JW.A5VH.01A.11R.A28H.07	CESC	01	tumor	0.65226
TCGA.JW.A5VI.01A.11R.A28H.07	CESC	01	tumor	0.57308
TCGA.JW.A5VJ.01A.11R.A28H.07	CESC	01	tumor	0.59055
TCGA.JW.A5VK.01A.11R.A28H.07	CESC	01	tumor	0.720439
TCGA.JW.A69B.01A.11R.A32P.07	CESC	01	tumor	0.513494
TCGA.JW.A852.01A.11R.A352.07	CESC	01	tumor	0.624493
TCGA.JW.AAVH.01A.11R.A38B.07	CESC	01	tumor	0.69312
TCGA.JX.A3PZ.01A.11R.A32Y.07	CESC	01	tumor	0.521103
TCGA.JX.A3Q0.01A.11R.A32Y.07	CESC	01	tumor	0.676229
TCGA.JX.A3Q8.01A.11R.A21T.07	CESC	01	tumor	0.611925
TCGA.JX.A5QV.01A.22R.A28H.07	CESC	01	tumor	0.628509
TCGA.LP.A4AU.01A.32R.A32Y.07	CESC	01	tumor	0.508745
TCGA.LP.A4AV.01A.11R.A32Y.07	CESC	01	tumor	0.526794
TCGA.LP.A4AW.01A.11R.A24H.07	CESC	01	tumor	0.472005
TCGA.LP.A4AX.01A.12R.A24H.07	CESC	01	tumor	0.574629
TCGA.LP.A5U2.01A.11R.A28H.07	CESC	01	tumor	0.687926
TCGA.LP.A5U3.01A.11R.A28H.07	CESC	01	tumor	0.644177
TCGA.LP.A7HU.01A.11R.A33Z.07	CESC	01	tumor	0.643806
TCGA.MA.AA3W.01A.11R.A38B.07	CESC	01	tumor	0.667257
TCGA.MA.AA3X.01A.22R.A42S.07	CESC	01	tumor	0.679121
TCGA.MA.AA3Y.01A.11R.A38B.07	CESC	01	tumor	0.675366
TCGA.MA.AA3Z.01A.11R.A38B.07	CESC	01	tumor	0.641752
TCGA.MA.AA41.01A.11R.A38B.07	CESC	01	tumor	0.675941
TCGA.MA.AA42.01A.12R.A38B.07	CESC	01	tumor	0.433431
TCGA.MA.AA43.01A.11R.A42T.07	CESC	01	tumor	0.638299
TCGA.MU.A51Y.01A.11R.A26T.07	CESC	01	tumor	0.525663
TCGA.MU.A5YI.01A.11R.A32P.07	CESC	01	tumor	0.552365
TCGA.MU.A8JM.01A.11R.A36F.07	CESC	01	tumor	0.541685
TCGA.MY.A5BD.01A.11R.A26T.07	CESC	01	tumor	0.56355
TCGA.MY.A5BE.01A.21R.A26T.07	CESC	01	tumor	0.522003
TCGA.MY.A5BF.01A.11R.A26T.07	CESC	01	tumor	0.589662
TCGA.MY.A913.01A.11R.A37O.07	CESC	01	tumor	0.541293
TCGA.PN.A8MA.01A.11R.A36F.07	CESC	01	tumor	0.707242
TCGA.Q1.A5R1.01A.11R.A28H.07	CESC	01	tumor	0.611439
TCGA.Q1.A5R2.01A.11R.A28H.07	CESC	01	tumor	0.587395
TCGA.Q1.A5R3.01A.11R.A28H.07	CESC	01	tumor	0.411677
TCGA.Q1.A6DT.01A.11R.A32P.07	CESC	01	tumor	0.657781
TCGA.Q1.A6DV.01A.11R.A32P.07	CESC	01	tumor	0.651444
TCGA.Q1.A6DW.01A.11R.A32P.07	CESC	01	tumor	0.702737
TCGA.Q1.A73O.01A.11R.A32P.07	CESC	01	tumor	0.655807
TCGA.Q1.A73P.01A.11R.A32P.07	CESC	01	tumor	0.570348
TCGA.Q1.A73Q.01A.21R.A32P.07	CESC	01	tumor	0.696079
TCGA.Q1.A73R.01A.11R.A33Z.07	CESC	01	tumor	0.809372
TCGA.Q1.A73S.01A.11R.A33Z.07	CESC	01	tumor	0.771979
TCGA.R2.A69V.01A.11R.A32P.07	CESC	01	tumor	0.442854
TCGA.RA.A741.01A.11R.A33Z.07	CESC	01	tumor	0.432486
TCGA.UC.A7PD.01A.11R.A352.07	CESC	01	tumor	0.680527
TCGA.UC.A7PF.01A.11R.A352.07	CESC	01	tumor	0.510211
TCGA.UC.A7PG.01A.11R.A42S.07	CESC	01	tumor	0.61359
TCGA.UC.A7PG.06A.11R.A42S.07	CESC	06	tumor	0.720532
TCGA.UC.A7PI.01A.11R.A42S.07	CESC	01	tumor	0.600874
TCGA.VS.A8EB.01A.11R.A36F.07	CESC	01	tumor	0.679986
TCGA.VS.A8EC.01A.11R.A36F.07	CESC	01	tumor	0.658606
TCGA.VS.A8EG.01A.11R.A36F.07	CESC	01	tumor	0.592369
TCGA.VS.A8EH.01A.11R.A36F.07	CESC	01	tumor	0.552818
TCGA.VS.A8EI.01A.11R.A37O.07	CESC	01	tumor	0.503756
TCGA.VS.A8EJ.01A.11R.A37O.07	CESC	01	tumor	0.539286
TCGA.VS.A8EK.01A.12R.A37O.07	CESC	01	tumor	0.625229
TCGA.VS.A8EL.01A.11R.A37O.07	CESC	01	tumor	0.516504
TCGA.VS.A8Q8.01A.11R.A37O.07	CESC	01	tumor	0.490612
TCGA.VS.A8Q9.01A.12R.A37O.07	CESC	01	tumor	0.637398
TCGA.VS.A8QA.01A.11R.A37O.07	CESC	01	tumor	0.729912
TCGA.VS.A8QC.01A.11R.A37O.07	CESC	01	tumor	0.589416
TCGA.VS.A8QF.01A.21R.A37O.07	CESC	01	tumor	0.581539
TCGA.VS.A8QH.01A.11R.A37O.07	CESC	01	tumor	0.556076
TCGA.VS.A8QM.01A.11R.A37O.07	CESC	01	tumor	0.446634
TCGA.VS.A94W.01A.12R.A37O.07	CESC	01	tumor	0.614256
TCGA.VS.A94X.01A.11R.A38B.07	CESC	01	tumor	0.605095
TCGA.VS.A94Y.01A.11R.A38B.07	CESC	01	tumor	0.484427
TCGA.VS.A94Z.01A.11R.A38B.07	CESC	01	tumor	0.584211
TCGA.VS.A950.01A.11R.A42T.07	CESC	01	tumor	0.589341
TCGA.VS.A952.01A.11R.A38B.07	CESC	01	tumor	0.691495
TCGA.VS.A953.01A.11R.A38B.07	CESC	01	tumor	0.872677
TCGA.VS.A954.01A.11R.A38B.07	CESC	01	tumor	0.606949
TCGA.VS.A957.01A.11R.A42T.07	CESC	01	tumor	0.68002
TCGA.VS.A958.01A.11R.A42T.07	CESC	01	tumor	0.705795
TCGA.VS.A959.01A.11R.A42T.07	CESC	01	tumor	0.499665
TCGA.VS.A9U5.01A.11R.A42T.07	CESC	01	tumor	0.686942
TCGA.VS.A9U6.01A.11R.A42T.07	CESC	01	tumor	0.47414
TCGA.VS.A9U7.01A.11R.A42T.07	CESC	01	tumor	0.58318
TCGA.VS.A9UB.01A.22R.A42T.07	CESC	01	tumor	0.532187
TCGA.VS.A9UC.01A.11R.A42T.07	CESC	01	tumor	0.658634
TCGA.VS.A9UD.01A.11R.A42T.07	CESC	01	tumor	0.541888
TCGA.VS.A9UH.01A.11R.A42T.07	CESC	01	tumor	0.496217
TCGA.VS.A9UI.01A.11R.A42T.07	CESC	01	tumor	0.584508
TCGA.VS.A9UJ.01A.11R.A42T.07	CESC	01	tumor	0.535038
TCGA.VS.A9UL.01A.11R.A42T.07	CESC	01	tumor	0.707208
TCGA.VS.A9UM.01A.11R.A42T.07	CESC	01	tumor	0.505049
TCGA.VS.A9UO.01A.11R.A42T.07	CESC	01	tumor	0.634564
TCGA.VS.A9UP.01A.11R.A42T.07	CESC	01	tumor	0.69264
TCGA.VS.A9UQ.01A.21R.A42T.07	CESC	01	tumor	0.506545
TCGA.VS.A9UR.01A.11R.A42T.07	CESC	01	tumor	0.588124
TCGA.VS.A9UT.01A.11R.A42T.07	CESC	01	tumor	0.390616
TCGA.VS.A9UU.01A.11R.A42T.07	CESC	01	tumor	0.53402
TCGA.VS.A9UV.01A.11R.A42T.07	CESC	01	tumor	0.674096
TCGA.VS.A9UY.01A.11R.A42T.07	CESC	01	tumor	0.780564
TCGA.VS.A9UZ.01A.11R.A42T.07	CESC	01	tumor	0.529896
TCGA.VS.A9V0.01A.11R.A42T.07	CESC	01	tumor	0.494266
TCGA.VS.A9V1.01A.11R.A42T.07	CESC	01	tumor	0.537103
TCGA.VS.A9V2.01A.11R.A42T.07	CESC	01	tumor	0.558586
TCGA.VS.A9V3.01A.11R.A42T.07	CESC	01	tumor	0.696558
TCGA.VS.A9V4.01A.12R.A42T.07	CESC	01	tumor	0.597847
TCGA.VS.A9V5.01A.11R.A42T.07	CESC	01	tumor	0.577453
TCGA.VS.AA62.01A.11R.A42T.07	CESC	01	tumor	0.603171
TCGA.WL.A834.01A.11R.A352.07	CESC	01	tumor	0.691155
TCGA.XS.A8TJ.01A.11R.A36F.07	CESC	01	tumor	0.723613
TCGA.ZJ.A8QO.01A.11R.A37O.07	CESC	01	tumor	0.606273
TCGA.ZJ.A8QQ.01A.11R.A37O.07	CESC	01	tumor	0.650276
TCGA.ZJ.A8QR.01A.11R.A37O.07	CESC	01	tumor	0.591128
TCGA.ZJ.AAX4.01A.11R.A42T.07	CESC	01	tumor	0.525233
TCGA.ZJ.AAX8.01A.11R.A42T.07	CESC	01	tumor	0.548868
TCGA.ZJ.AAXA.01A.11R.A42T.07	CESC	01	tumor	0.738274
TCGA.ZJ.AAXB.01A.11R.A42T.07	CESC	01	tumor	0.967092
TCGA.ZJ.AAXD.01A.21R.A42T.07	CESC	01	tumor	0.68067
TCGA.ZJ.AAXF.01A.31R.A42T.07	CESC	01	tumor	0.468481
TCGA.ZJ.AAXI.01A.11R.A42T.07	CESC	01	tumor	0.657746
TCGA.ZJ.AAXJ.01A.11R.A42T.07	CESC	01	tumor	0.638941
TCGA.ZJ.AAXN.01A.11R.A42T.07	CESC	01	tumor	0.604084
TCGA.ZJ.AAXT.01A.11R.A42T.07	CESC	01	tumor	0.607057
TCGA.ZJ.AAXU.01A.11R.A42T.07	CESC	01	tumor	0.621987
TCGA.ZJ.AB0H.01A.11R.A42T.07	CESC	01	tumor	0.532
TCGA.ZJ.AB0I.01A.11R.A42T.07	CESC	01	tumor	0.56263
TCGA.ZX.AA5X.01A.11R.A42T.07	CESC	01	tumor	0.430384
TCGA.W5.AA2I.11A.11R.A41I.07	CHOL	11	normal	0.153751
TCGA.W5.AA2Q.11A.11R.A41I.07	CHOL	11	normal	0.127378
TCGA.W5.AA2R.11A.11R.A41I.07	CHOL	11	normal	0.10847
[truncated: 7,878 more rows]
