# Supplementary material for: Integrated analysis of telomerase enzymatic activity unravels an association with cancer stemness and proliferation
Source: Nat Commun. 2021 Jan 8;12:139. doi: 10.1038/s41467-020-20474-9 (PMC7794223; doi:10.1038/s41467-020-20474-9)
Supplement: Supplementary file 8 — Supplementary Data 5 [file 41467_2020_20474_MOESM8_ESM.xlsx]

## Sheet: Supp.Data 5
Supplementary Data 5
Cancer	Corr	Pvalue	FDR	Permut_Iterations	Equi&HighCases	EmpiricalPval
ACC	0.389623	0.000465383	0.01	1000	19	0.019
BLCA	0.703876	0	0	1000	0	0
BRCA	0.759363	6.64e-208	0	1000	0	0
CESC	0.520657	9.94e-23	0	1000	1	0.001
CHOL	0.666924	1.5e-05	0	1000	5	0.005
CRC	0.758658	3.23e-71	0	1000	0	0
DLBC	0.728398	3.05e-08	0	1000	0	0
ESCA	0.753853	3.24e-35	0	1000	0	0
GBM	0.430337	7.89e-10	0	1000	11	0.011
HNSC	0.695368	2.39e-76	0	1000	0	0
KICH	0.385708	0.00162431	0.05	1000	97	0.097
KIRC	0.184637	2.35e-05	0	1000	216	0.216
KIRP	0.209606	0.000341581	0.01	1000	183	0.183
LAML	0.676314	0	0	1000	0	0
LGG	0.649444	8.03e-26	0	1000	1	0.001
LIHC	0.602885	7.1e-39	0	1000	0	0
LUAD	0.749293	4.7e-94	0	1000	0	0
LUSC	0.734679	4.26e-84	0	1000	0	0
OV	0.62857	3.41e-32	0	1000	0	0
PAAD	0.682054	4.26e-23	0	1000	0	0
PCPG	0.601295	1.48e-20	0	1000	0	0
PRAD	0.691512	8.71e-72	0	1000	0	0
SARC	0.545316	5.23e-22	0	1000	0	0
SKCM	0.625275	3.23e-53	0	1000	0	0
STAD	0.832985	0	0	1000	0	0
TGCT	0.852271	2.68e-48	0	1000	0	0
THCA	0.234179	5.85e-08	0	1000	181	0.181
THYM	0.796396	0	0	1000	0	0
UCEC	0.660109	2.9e-23	0	1000	0	0
UCS	0.547965	1.44e-05	0	1000	1	0.001
UVM	0.607032	3.84e-09	0	1000	4	0.004
