# Supplementary material for: Integrated analysis of telomerase enzymatic activity unravels an association with cancer stemness and proliferation
Source: Nat Commun. 2021 Jan 8;12:139. doi: 10.1038/s41467-020-20474-9 (PMC7794223; doi:10.1038/s41467-020-20474-9)
Supplement: Supplementary file 9 — Supplementary Data 6 [file 41467_2020_20474_MOESM9_ESM.xlsx]

## Sheet: Supp.Data 6
Supplementary Data 6
MEDULLOBLASTOMA
UP Regulated Pathways									DN Regulated Pathways
Gene Set Name	# Genes in Gene Set (K)	Description	# Genes in Overlap (k)	k/K	p-value	FDR q-value			Gene Set Name	# Genes in Gene Set (K)	Description	# Genes in Overlap (k)	k/K	p-value	FDR q-value
GO_CELL_CYCLE	1847	The progression of biochemical and morphological phases and events that occur in a cell during successive cell replication or nuclear replication events. Canonically, the cell cycle comprises the replication and segregation of genetic material followed by the division of the cell, but in endocycles or syncytial cells nuclear replication or nuclear division may not be followed by cell division. [G…	76	0.0411	2.02e-79	1.48e-75			GO_CELL_CELL_SIGNALING	1644	Any process that mediates the transfer of information from one cell to another. This process includes signal transduction in the receiving cell and, where applicable, release of a ligand and any processes that actively facilitate its transport and presentation to the receiving cell. Examples include signaling via soluble ligands, via cell adhesion molecules and via gap junctions. [GOC:dos, GOC:ma…	24	0.0146	5.11e-12	3.75e-08
GO_MITOTIC_CELL_CYCLE	1009	Progression through the phases of the mitotic cell cycle, the most common eukaryotic cell cycle, which canonically comprises four successive phases called G1, S, G2, and M and includes replication of the genome and the subsequent segregation of chromosomes into daughter cells. In some variant cell cycles nuclear replication or nuclear division may not be followed by cell division, or G1 and G2 ph…	62	0.0614	2.4e-72	8.83e-69			GO_SIGNAL_RELEASE	460	The process in which a signal is secreted or discharged into the extracellular medium from a cellular source. [GOC:mtg_signal]	14	0.0304	2e-11	7.37e-08
GO_CELL_CYCLE_PROCESS	1383	The cellular process that ensures successive accurate and complete genome replication and chromosome segregation. [GOC:isa_complete, GOC:mtg_cell_cycle]	62	0.0448	8.67e-64	2.12e-60			GO_BEHAVIOR	594	The internally coordinated responses (actions or inactions) of animals (individuals or groups) to internal or external stimuli, via a mechanism that involves nervous system activity. [GOC:ems, GOC:jl, ISBN:0395448956, PMID:20160973]	14	0.0236	5.65e-10	1.14e-06
GO_CHROMOSOME_ORGANIZATION	1207	A process that is carried out at the cellular level that results in the assembly, arrangement of constituent parts, or disassembly of chromosomes, structures composed of a very long molecule of DNA and associated proteins that carries hereditary information. This term covers covalent modifications at the molecular level as well as spatial relationships among the major components of a chromosome. …	54	0.0447	3.17e-54	5.83e-51			GO_SYNAPTIC_SIGNALING	713	Cell-cell signaling to, from or or within a synapse. [GOC:dos]	15	0.021	6.19e-10	1.14e-06
GO_CELL_DIVISION	593	The process resulting in division and partitioning of components of a cell to form more cells; may or may not be accompanied by the physical separation of a cell into distinct, individually membrane-bounded daughter cells. [GOC:di, GOC:go_curators, GOC:pr]	44	0.0742	7.56e-53	1.11e-49			GO_ION_TRANSPORT	1677	The directed movement of charged atoms or small charged molecules into, out of or within a cell, or between cells, by means of some agent such as a transporter or pore. [GOC:ai]	21	0.0125	2.15e-09	2.97e-06
GO_ORGANELLE_FISSION	463	The creation of two or more organelles by division of one organelle. [GOC:jid]	40	0.0864	1.99e-50	2.44e-47			GO_NEUROTRANSMITTER_TRANSPORT	267	The directed movement of a neurotransmitter into, out of or within a cell, or between cells, by means of some agent such as a transporter or pore. Neurotransmitters are any chemical substance that is capable of transmitting (or inhibiting the transmission of) a nerve impulse from a neuron to another cell. [GOC:ai]	10	0.0375	2.43e-09	2.97e-06
GO_MITOTIC_NUCLEAR_DIVISION	282	A mitotic cell cycle process comprising the steps by which the nucleus of a eukaryotic cell divides; the process involves condensation of chromosomal DNA into a highly compacted form. Canonically, mitosis produces two daughter nuclei whose chromosome complement is identical to that of the mother cell. [ISBN:0198547684]	35	0.1241	1.48e-49	1.56e-46			GO_LEARNING	142	Any process in an organism in which a relatively long-lasting adaptive behavioral change occurs as the result of experience. [ISBN:0582227089, ISBN:0721662544]	8	0.0563	4.29e-09	4.51e-06
GO_CHROMOSOME_SEGREGATION	316	The process in which genetic material, in the form of chromosomes, is organized into specific structures and then physically separated and apportioned to two or more sets. In eukaryotes, chromosome segregation begins with the condensation of chromosomes, includes chromosome separation, and ends when chromosomes have completed movement to the spindle poles. [GOC:jl, GOC:mah, GOC:mtg_cell_cycle, GO…	32	0.1013	3.11e-42	2.86e-39			GO_SIGNAL_RELEASE_FROM_SYNAPSE	170	Any signal release from a synapse. [GOC:dos]	8	0.0471	1.76e-08	1.62e-05
GO_CELL_CYCLE_PHASE_TRANSITION	621	The cell cycle process by which a cell commits to entering the next cell cycle phase. [GOC:mtg_cell_cycle]	38	0.0612	5.43e-42	4.44e-39			GO_REGULATION_OF_TRANS_SYNAPTIC_SIGNALING	434	Any process that modulates the frequency, rate or extent of trans-synaptic signaling. [GOC:dos]	11	0.0253	2.13e-08	1.74e-05
GO_REGULATION_OF_CELL_CYCLE	1212	Any process that modulates the rate or extent of progression through the cell cycle. [GOC:ai, GOC:dph, GOC:tb]	45	0.0371	1.27e-40	9.35e-38			GO_SECRETION	1638	The controlled release of a substance by a cell or a tissue. [GOC:ai]	19	0.0116	4.74e-08	3.48e-05
GO_REGULATION_OF_CELL_CYCLE_PROCESS	796	Any process that modulates a cellular process that is involved in the progression of biochemical and morphological phases and events that occur in a cell during successive cell replication or nuclear replication events. [GOC:dph, GOC:tb]	39	0.049	2.12e-39	1.42e-36			GO_CATION_TRANSPORT	1159	The directed movement of cations, atoms or small molecules with a net positive charge, into, out of or within a cell, or between cells, by means of some agent such as a transporter or pore. [GOC:ai]	16	0.0138	6.04e-08	4.04e-05
GO_NUCLEAR_CHROMOSOME_SEGREGATION	262	The process in which genetic material, in the form of nuclear chromosomes, is organized into specific structures and then physically separated and apportioned to two or more sets. Nuclear chromosome segregation begins with the condensation of chromosomes, includes chromosome separation, and ends when chromosomes have completed movement to the spindle poles. [GOC:dos]	28	0.1069	1.54e-37	9.44e-35			GO_COGNITION	293	The operation of the mind by which an organism becomes aware of objects of thought or perception; it includes the mental activities associated with thinking, learning, and memory. [http://www.onelook.com/, ISBN:0721619908]	9	0.0307	8.67e-08	5.31e-05
GO_REGULATION_OF_MITOTIC_CELL_CYCLE	670	Any process that modulates the rate or extent of progress through the mitotic cell cycle. [GOC:dph, GOC:go_curators, GOC:tb]	35	0.0522	4.07e-36	2.3e-33			GO_REGULATION_OF_TRANSPORT	1842	Any process that modulates the frequency, rate or extent of the directed movement of substances (such as macromolecules, small molecules, ions) into, out of or within a cell, or between cells, by means of some agent such as a transporter or pore. [GOC:ai]	19	0.0103	2.91e-07	0.000165
GO_SISTER_CHROMATID_SEGREGATION	189	The cell cycle process in which sister chromatids are organized and then physically separated and apportioned to two or more sets. [GOC:ai, GOC:elh]	25	0.1323	6.45e-36	3.39e-33			GO_METAL_ION_TRANSPORT	885	The directed movement of metal ions, any metal ion with an electric charge, into, out of or within a cell, or between cells, by means of some agent such as a transporter or pore. [GOC:ai]	13	0.0147	5.88e-07	0.000309
GO_MITOTIC_SISTER_CHROMATID_SEGREGATION	151	The cell cycle process in which replicated homologous chromosomes are organized and then physically separated and apportioned to two sets during the mitotic cell cycle. Each replicated chromosome, composed of two sister chromatids, aligns at the cell equator, paired with its homologous partner. One homolog of each morphologic type goes into each of the resulting chromosome sets. [GOC:ai, GOC:jl]	23	0.1523	1.51e-34	7.39e-32			GO_SYNAPTIC_VESICLE_CYCLE	191	A biological process in which synaptic vesicles are loaded with neurotransmitters, move to the active zone, exocytose and are then recycled via endocytosis, ultimately leading to reloading with neurotransmitters. [PMID:15217342]	7	0.0366	7.76e-07	0.000379
GO_DNA_METABOLIC_PROCESS	850	Any cellular metabolic process involving deoxyribonucleic acid. This is one of the two main types of nucleic acid, consisting of a long, unbranched macromolecule formed from one, or more commonly, two, strands of linked deoxyribonucleotides. [ISBN:0198506732]	35	0.0412	1.52e-32	6.96e-30			GO_ACIDIC_AMINO_ACID_TRANSPORT	65	The directed movement of acidic amino acids, amino acids with a pH below 7, into, out of or within a cell, or between cells, by means of some agent such as a transporter or pore. [GOC:ai]	5	0.0769	8.26e-07	0.000379
GO_DNA_CONFORMATION_CHANGE	303	A cellular process that results in a change in the spatial configuration of a DNA molecule. A conformation change can bend DNA, or alter the, twist, writhe, or linking number of a DNA molecule. [GOC:mah]	25	0.0825	1.32e-30	5.7e-28			GO_REGULATION_OF_HORMONE_LEVELS	513	Any process that modulates the levels of hormone within an organism or a tissue. A hormone is any substance formed in very small amounts in one specialized organ or group of cells and carried (sometimes in the bloodstream) to another organ or group of cells in the same organism, upon which it has a specific regulatory action. [GOC:BHF, GOC:dph, GOC:tb]	10	0.0195	1.06e-06	0.000449
GO_DNA_REPLICATION	272	The cellular metabolic process in which a cell duplicates one or more molecules of DNA. DNA replication begins when specific sequences, known as origins of replication, are recognized and bound by initiation proteins, and ends when the original DNA molecule has been completely duplicated and the copies topologically separated. The unit of replication usually corresponds to the genome of the cell,…	24	0.0882	4.24e-30	1.73e-27			GO_NEURON_DEVELOPMENT	1096	The process whose specific outcome is the progression of a neuron over time, from initial commitment of the cell to a specific fate, to the fully functional differentiated cell. [GOC:dph]	14	0.0128	1.1e-06	0.000449
GO_REGULATION_OF_NUCLEAR_DIVISION	207	Any process that modulates the frequency, rate or extent of nuclear division, the partitioning of the nucleus and its genetic information. [GOC:ai]	21	0.1014	1.1e-27	4.26e-25			GO_SYNAPSE_ORGANIZATION	406	A process that is carried out at the cellular level which results in the assembly, arrangement of constituent parts, or disassembly of a synapse, the junction between a neuron and a target (neuron, muscle, or secretory cell). [GOC:ai, GOC:pr]	9	0.0222	1.33e-06	0.000513
GO_POSITIVE_REGULATION_OF_CELL_CYCLE	403	Any process that activates or increases the rate or extent of progression through the cell cycle. [GOC:go_curators]	25	0.062	1.77e-27	6.49e-25			GO_ION_TRANSMEMBRANE_TRANSPORT	1138	A process in which an ion is transported across a membrane. [GOC:mah]	14	0.0123	1.71e-06	0.000628
GO_CELLULAR_RESPONSE_TO_DNA_DAMAGE_STIMULUS	845	Any process that results in a change in state or activity of a cell (in terms of movement, secretion, enzyme production, gene expression, etc.) as a result of a stimulus indicating damage to its DNA from environmental insults or errors during metabolism. [GOC:go_curators]	30	0.0355	7.19e-26	2.52e-23			GO_CATION_TRANSMEMBRANE_TRANSPORT	847	The process in which a cation is transported across a membrane. [GOC:dos, GOC:vw]	12	0.0142	2.39e-06	0.000808
GO_NEGATIVE_REGULATION_OF_CELL_CYCLE	643	Any process that stops, prevents or reduces the rate or extent of progression through the cell cycle. [GOC:dph, GOC:go_curators, GOC:tb]	27	0.042	3.7e-25	1.24e-22			GO_NEURON_DIFFERENTIATION	1348	The process in which a relatively unspecialized cell acquires specialized features of a neuron. [GOC:mah]	15	0.0111	2.42e-06	0.000808
GO_POSITIVE_REGULATION_OF_CELL_CYCLE_PROCESS	297	Any process that increases the rate, frequency or extent of a cellular process that is involved in the progression of biochemical and morphological phases and events that occur in a cell during successive cell replication or nuclear replication events. [GOC:dph, GOC:tb]	21	0.0707	2.51e-24	8.01e-22			GO_REGULATION_OF_NEUROTRANSMITTER_LEVELS	333	Any process that modulates levels of neurotransmitter. [GOC:jl]	8	0.024	2.92e-06	0.000935
GO_DNA_REPAIR	544	The process of restoring DNA after damage. Genomes are subject to damage by chemical and physical agents in the environment (e.g. UV and ionizing radiations, chemical mutagens, fungal and bacterial toxins, etc.) and by free radicals or alkylating agents endogenously generated in metabolism. DNA is also damaged because of errors during its replication. A variety of different DNA repair pathways ha…	25	0.046	2.99e-24	9.15e-22			GO_NEUROGENESIS	1599	Generation of cells within the nervous system. [GO_REF:0000021, GOC:cls, GOC:curators, GOC:dgh, GOC:dph, GOC:jid, GOC:mtg_15jun06]	16	0.01	4.2e-06	0.00129
GO_REGULATION_OF_CELL_CYCLE_PHASE_TRANSITION	478	Any process that modulates the frequency, rate or extent of cell cycle phase transition. [GOC:mtg_cell_cycle, GOC:TermGenie, PMID:22841721]	24	0.0502	3.4e-24	1e-21			GO_SYNAPTIC_VESICLE_LOCALIZATION	163	Any process in which a synaptic vesicle or vesicles are transported to, and/or maintained in, a specific location. [GOC:pr]	6	0.0368	4.81e-06	0.00142
GO_CELL_CYCLE_CHECKPOINT	216	A cell cycle process that controls cell cycle progression by monitoring the integrity of specific cell cycle events. A cell cycle checkpoint begins with detection of deficiencies or defects and ends with signal transduction. [GOC:mtg_cell_cycle]	19	0.088	6.81e-24	1.93e-21			GO_DICARBOXYLIC_ACID_TRANSPORT	95	The directed movement of dicarboxylic acids into, out of or within a cell, or between cells, by means of some agent such as a transporter or pore. [GOC:krc]	5	0.0526	5.44e-06	0.00153
GO_CELL_CYCLE_G1_S_PHASE_TRANSITION	293	The cell cycle process by which a cell in G1 phase commits to S phase. [GOC:mtg_cell_cycle]	20	0.0683	6.92e-23	1.88e-20			GO_GLUTAMATE_SECRETION	44	The controlled release of glutamate by a cell. The glutamate is the most abundant excitatory neurotransmitter in the nervous system. [GOC:ef]	4	0.0909	5.62e-06	0.00153
GO_DNA_PACKAGING	207	Any process in which DNA and associated proteins are formed into a compact, orderly structure. [GOC:mah, ISBN:0815316194]	18	0.087	1.4e-22	3.67e-20			GO_REGULATION_OF_NEURON_PROJECTION_DEVELOPMENT	489	Any process that modulates the rate, frequency or extent of neuron projection development. Neuron projection development is the process whose specific outcome is the progression of a neuron projection over time, from its formation to the mature structure. A neuron projection is any process extending from a neural cell, such as axons or dendrites (collectively called neurites). [GOC:dph, GOC:tb]	9	0.0184	6e-06	0.00158
GO_SPINDLE_ORGANIZATION	168	A process that is carried out at the cellular level which results in the assembly, arrangement of constituent parts, or disassembly of the spindle, the array of microtubules and associated molecules that forms between opposite poles of a eukaryotic cell during DNA segregation and serves to move the duplicated chromosomes apart. [GOC:go_curators, GOC:mah]	17	0.1012	1.62e-22	4.1e-20			GO_REGULATION_OF_HORMONE_SECRETION	263	Any process that modulates the frequency, rate or extent of the regulated release of a hormone from a cell. [GOC:ai]	7	0.0266	6.44e-06	0.00163
GO_REGULATION_OF_CHROMOSOME_SEGREGATION	103	Any process that modulates the frequency, rate or extent of chromosome segregation, the process in which genetic material, in the form of chromosomes, is organized and then physically separated and apportioned to two or more sets. [GOC:ai]	15	0.1456	1.89e-22	4.63e-20			GO_REGULATION_OF_SECRETION	788	Any process that modulates the frequency, rate or extent of the controlled release of a substance from a cell or a tissue. [GOC:ai]	11	0.014	7.45e-06	0.00182
GO_MICROTUBULE_BASED_PROCESS	734	Any cellular process that depends upon or alters the microtubule cytoskeleton, that part of the cytoskeleton comprising microtubules and their associated proteins. [GOC:mah]	26	0.0354	2.33e-22	5.52e-20			GO_REGULATION_OF_METAL_ION_TRANSPORT	383	Any process that modulates the frequency, rate, or extent of metal ion transport. Metal ion transport is the directed movement of metal ions, any metal ion with an electric charge, into, out of or within a cell, or between cells, by means of some agent such as a transporter or pore. [GOC:dph, GOC:tb]	8	0.0209	8.13e-06	0.00193
GO_DNA_DEPENDENT_DNA_REPLICATION	147	A DNA replication process that uses parental DNA as a template for the DNA-dependent DNA polymerases that synthesize the new strands. [GOC:mah, ISBN:0198506732]	16	0.1088	9.13e-22	2.1e-19			GO_REGULATION_OF_SYNAPTIC_PLASTICITY	182	A process that modulates synaptic plasticity, the ability of synapses to change as circumstances require. They may alter function, such as increasing or decreasing their sensitivity, or they may increase or decrease in actual numbers. [GOC:dph, GOC:jid, GOC:tb, http://www.mercksource.com, PMID:11891290]	6	0.033	9.05e-06	0.00202
GO_MICROTUBULE_CYTOSKELETON_ORGANIZATION	535	A process that is carried out at the cellular level which results in the assembly, arrangement of constituent parts, or disassembly of cytoskeletal structures comprising microtubules and their associated proteins. [GOC:mah]	23	0.043	1.12e-21	2.5e-19			GO_REGULATION_OF_NEUROTRANSMITTER_SECRETION	106	Any process that modulates the frequency, rate or extent of the regulated release of a neurotransmitter from a cell. [GOC:ai]	5	0.0472	9.3e-06	0.00202
GO_CHROMOSOME_SEPARATION	90	The cell cycle process in which paired chromosomes are detached from each other. Chromosome separation begins with the release of cohesin complexes from chromosomes; in budding yeast, this includes the cleavage of cohesin complexes along the chromosome arms, followed by the separation of the centromeric regions. Chromosome separation also includes formation of chromatid axes mediated by condensin…	14	0.1556	1.92e-21	4.14e-19			GO_RHYTHMIC_PROCESS	279	Any process pertinent to the generation and maintenance of rhythms in the physiology of an organism. [GOC:jid]	7	0.0251	9.45e-06	0.00202
GO_NEGATIVE_REGULATION_OF_CELL_CYCLE_PROCESS	358	Any process that decreases the rate, frequency or extent of a cellular process that is involved in the progression of biochemical and morphological phases and events that occur in a cell during successive cell replication or nuclear replication events. [GOC:dph, GOC:tb]	20	0.0559	3.78e-21	7.94e-19			GO_CELL_PROJECTION_ORGANIZATION	1512	A process that is carried out at the cellular level which results in the assembly, arrangement of constituent parts, or disassembly of a prolongation or process extending from a cell, e.g. a flagellum or axon. [GOC:jl, GOC:mah, http://www.cogsci.princeton.edu/~wn/]	15	0.0099	9.61e-06	0.00202
GO_MICROTUBULE_CYTOSKELETON_ORGANIZATION_INVOLVED_IN_MITOSIS	125	Any microtubule cytoskeleton organization that is involved in mitosis. [GO_REF:0000060, GOC:TermGenie, PMID:18799626]	15	0.12	4.01e-21	8.18e-19			GO_INORGANIC_ION_TRANSMEMBRANE_TRANSPORT	834	The process in which an inorganic ion is transported across a membrane. [GOC:mah]	11	0.0132	1.26e-05	0.00258
GO_MITOTIC_CELL_CYCLE_CHECKPOINT	165	A cell cycle checkpoint that ensures accurate chromosome replication and segregation by preventing progression through a mitotic cell cycle until conditions are suitable for the cell to proceed to the next stage. [GOC:mtg_cell_cycle]	16	0.097	6.14e-21	1.22e-18			GO_MEMORY	115	The activities involved in the mental information processing system that receives (registers), modifies, stores, and retrieves informational stimuli. The main stages involved in the formation and retrieval of memory are encoding (processing of received information by acquisition), storage (building a permanent record of received information as a result of consolidation) and retrieval (calling bac…	5	0.0435	1.38e-05	0.00275
GO_REGULATION_OF_ORGANELLE_ORGANIZATION	1259	Any process that modulates the frequency, rate or extent of a process involved in the formation, arrangement of constituent parts, or disassembly of an organelle. [GOC:mah]	30	0.0238	6.36e-21	1.23e-18			GO_SYNAPTIC_VESICLE_EXOCYTOSIS	120	Fusion of intracellular membrane-bounded vesicles with the pre-synaptic membrane of the neuronal cell resulting in release of neurotransmitter into the synaptic cleft. [GOC:jid, GOC:lmg]	5	0.0417	1.7e-05	0.00329
GO_MEIOTIC_CELL_CYCLE	249	Progression through the phases of the meiotic cell cycle, in which canonically a cell replicates to produce four offspring with half the chromosomal content of the progenitor cell via two nuclear divisions. [GOC:ai]	17	0.0683	1.46e-19	2.75e-17			GO_PROTEIN_LOCALIZATION_TO_CELL_PERIPHERY	311	A process in which a protein is transported to, or maintained in, the cell periphery. [PMID:18216290]	7	0.0225	1.9e-05	0.00359
GO_CELL_CYCLE_G2_M_PHASE_TRANSITION	269	The cell cycle process by which a cell in G2 phase commits to M phase. [GOC:jl, GOC:mtg_cell_cycle]	17	0.0632	5.43e-19	9.97e-17			GO_CALCIUM_ION_TRANSMEMBRANE_TRANSPORT	315	A process in which a calcium ion is transported from one side of a membrane to the other by means of some agent such as a transporter or pore. [GOC:mah]	7	0.0222	2.06e-05	0.00379
GO_NEGATIVE_REGULATION_OF_MITOTIC_CELL_CYCLE	335	Any process that stops, prevents or reduces the rate or extent of progression through the mitotic cell cycle. [GOC:dph, GOC:go_curators, GOC:tb]	18	0.0537	8.41e-19	1.51e-16			GO_CELLULAR_LIPID_METABOLIC_PROCESS	885	The chemical reactions and pathways involving lipids, as carried out by individual cells. [GOC:jl]	11	0.0124	2.18e-05	0.00384
GO_MITOTIC_SPINDLE_ORGANIZATION	104	A process that is carried out at the cellular level which results in the assembly, arrangement of constituent parts, or disassembly of the microtubule spindle during a mitotic cell cycle. [GOC:go_curators, GOC:mah]	13	0.125	1.11e-18	1.94e-16			GO_HORMONE_TRANSPORT	319	The directed movement of hormones into, out of or within a cell, or between cells, by means of some agent such as a transporter or pore. [GOC:tb]	7	0.0219	2.24e-05	0.00384
GO_REGULATION_OF_SISTER_CHROMATID_SEGREGATION	80	Any process that modulates the frequency, rate or extent of sister chromatid segregation. [GOC:mah]	12	0.15	2.51e-18	4.29e-16			GO_CELL_MORPHOGENESIS_INVOLVED_IN_DIFFERENTIATION	727	The change in form (cell shape and size) that occurs when relatively unspecialized cells, e.g. embryonic or regenerative cells, acquire specialized structural and/or functional features that characterize the cells, tissues, or organs of the mature organism or some other relatively stable phase of the organism's life history. [GOC:go_curators]	10	0.0138	2.25e-05	0.00384
GO_REGULATION_OF_CHROMOSOME_SEPARATION	62	Any process that modulates the frequency, rate or extent of chromosome separation. [GO_REF:0000058, GOC:bhm, GOC:TermGenie, PMID:21795393]	11	0.1774	9.48e-18	1.58e-15			GO_SODIUM_ION_TRANSPORT	217	The directed movement of sodium ions (Na+) into, out of or within a cell, or between cells, by means of some agent such as a transporter or pore. [GOC:ai]	6	0.0276	2.45e-05	0.00409
GO_NEGATIVE_REGULATION_OF_CELL_CYCLE_PHASE_TRANSITION	265	Any process that stops, prevents or reduces the frequency, rate or extent of cell cycle phase transition. [GOC:mtg_cell_cycle, GOC:TermGenie, PMID:22841721]	16	0.0604	1.31e-17	2.14e-15			GO_REGULATION_OF_CATION_TRANSMEMBRANE_TRANSPORT	331	Any process that modulates the frequency, rate or extent of cation transmembrane transport. [GO_REF:0000058, GOC:TermGenie, PMID:15304482]	7	0.0211	2.83e-05	0.00463
GO_POSITIVE_REGULATION_OF_MITOTIC_CELL_CYCLE	166	Any process that activates or increases the rate or extent of progression through the mitotic cell cycle. [GOC:dph, GOC:go_curators, GOC:tb]	14	0.0843	1.42e-17	2.28e-15			GO_REGULATION_OF_NERVOUS_SYSTEM_DEVELOPMENT	914	Any process that modulates the frequency, rate or extent of nervous system development, the origin and formation of nervous tissue. [GOC:ai]	11	0.012	2.93e-05	0.00468
GO_REGULATION_OF_CHROMOSOME_ORGANIZATION	336	Any process that modulates the frequency, rate or extent of a process involved in the formation, arrangement of constituent parts, or disassembly of a chromosome. [GOC:mah]	17	0.0506	2.3e-17	3.6e-15			GO_AMINO_ACID_TRANSPORT	141	The directed movement of amino acids, organic acids containing one or more amino substituents, into, out of or within a cell, or between cells, by means of some agent such as a transporter or pore. [GOC:ai]	5	0.0355	3.69e-05	0.0055
GO_MEIOTIC_CELL_CYCLE_PROCESS	187	A process that is part of the meiotic cell cycle. [GO_REF:0000060, GOC:mtg_cell_cycle, GOC:TermGenie]	14	0.0749	7.71e-17	1.18e-14			GO_REGULATION_OF_NEUROTRANSMITTER_TRANSPORT	141	Any process that modulates the frequency, rate or extent of the directed movement of a neurotransmitter into, out of or within a cell, or between cells, by means of some agent such as a transporter or pore. [GOC:ai]	5	0.0355	3.69e-05	0.0055
GO_METAPHASE_ANAPHASE_TRANSITION_OF_CELL_CYCLE	56	The cell cycle process in which a cell progresses from metaphase to anaphase as part of the cell cycle. [GOC:mtg_cell_cycle]	10	0.1786	2.87e-16	4.3e-14			GO_CELLULAR_COMPONENT_MORPHOGENESIS	1115	The process in which cellular structures, including whole cells or cell parts, are generated and organized. [GOC:dph, GOC:mah, GOC:tb]	12	0.0108	3.71e-05	0.0055
GO_DNA_INTEGRITY_CHECKPOINT	158	A cell cycle process that controls cell cycle progression in response to changes in DNA structure by monitoring the integrity of the DNA. The DNA integrity checkpoint begins with detection of DNA damage, defects in DNA structure or DNA replication, and progresses through signal transduction and ends with cell cycle effector processes. [GOC:mtg_cell_cycle]	13	0.0823	3e-16	4.41e-14			GO_REGULATION_OF_CELL_DEVELOPMENT	939	Any process that modulates the rate, frequency or extent of the progression of the cell over time, from its formation to the mature structure. Cell development does not include the steps involved in committing a cell to a specific fate. [GOC:dph, GOC:tb]	11	0.0117	3.74e-05	0.0055
GLIOBLASTOMA
UP Regulated Pathways									DN Regulated Pathways
Gene Set Name	# Genes in Gene Set (K)	Description	# Genes in Overlap (k)	k/K	p-value	FDR q-value			Gene Set Name	# Genes in Gene Set (K)	Description	# Genes in Overlap (k)	k/K	p-value	FDR q-value
GO_DNA_REPLICATION	272	The cellular metabolic process in which a cell duplicates one or more molecules of DNA. DNA replication begins when specific sequences, known as origins of replication, are recognized and bound by initiation proteins, and ends when the original DNA molecule has been completely duplicated and the copies topologically separated. The unit of replication usually corresponds to the genome of the cell,…	88	0.3235	1.05e-63	7.69e-60			GO_CELL_ACTIVATION	1424	A change in the morphology or behavior of a cell resulting from exposure to an activating factor such as a cellular or soluble ligand. [GOC:mgi_curators]	66	0.0463	1.26e-33	9.3e-30
GO_DNA_METABOLIC_PROCESS	850	Any cellular metabolic process involving deoxyribonucleic acid. This is one of the two main types of nucleic acid, consisting of a long, unbranched macromolecule formed from one, or more commonly, two, strands of linked deoxyribonucleotides. [ISBN:0198506732]	140	0.1647	8.25e-60	3.03e-56			GO_BIOLOGICAL_ADHESION	1417	The attachment of a cell or organism to a substrate, another cell, or other organism. Biological adhesion includes intracellular attachment between membrane regions. [GOC:isa_complete]	59	0.0416	1.59e-27	5.84e-24
GO_CELL_CYCLE	1847	The progression of biochemical and morphological phases and events that occur in a cell during successive cell replication or nuclear replication events. Canonically, the cell cycle comprises the replication and segregation of genetic material followed by the division of the cell, but in endocycles or syncytial cells nuclear replication or nuclear division may not be followed by cell division. [G…	206	0.1115	1.35e-58	3.3e-55			GO_DEFENSE_RESPONSE	1709	Reactions, triggered in response to the presence of a foreign body or the occurrence of an injury, which result in restriction of damage to the organism attacked or prevention/recovery from the infection caused by the attack. [GOC:go_curators]	62	0.0363	9.68e-26	2.37e-22
GO_CELL_CYCLE_PROCESS	1383	The cellular process that ensures successive accurate and complete genome replication and chromosome segregation. [GOC:isa_complete, GOC:mtg_cell_cycle]	170	0.1229	6.88e-54	1.26e-50			GO_RESPONSE_TO_CYTOKINE	1192	Any process that results in a change in state or activity of a cell or an organism (in terms of movement, secretion, enzyme production, gene expression, etc.) as a result of a cytokine stimulus. [GOC:sl]	52	0.0436	3.74e-25	6.87e-22
GO_CHROMOSOME_ORGANIZATION	1207	A process that is carried out at the cellular level that results in the assembly, arrangement of constituent parts, or disassembly of chromosomes, structures composed of a very long molecule of DNA and associated proteins that carries hereditary information. This term covers covalent modifications at the molecular level as well as spatial relationships among the major components of a chromosome. …	155	0.1284	1.68e-51	2.47e-48			GO_INFLAMMATORY_RESPONSE	722	The immediate defensive reaction (by vertebrate tissue) to infection or injury caused by chemical or physical agents. The process is characterized by local vasodilation, extravasation of plasma into intercellular spaces and accumulation of white blood cells and macrophages. [GO_REF:0000022, GOC:mtg_15nov05, ISBN:0198506732]	40	0.0554	3.76e-23	5.52e-20
GO_DNA_DEPENDENT_DNA_REPLICATION	147	A DNA replication process that uses parental DNA as a template for the DNA-dependent DNA polymerases that synthesize the new strands. [GOC:mah, ISBN:0198506732]	60	0.4082	1.01e-50	1.24e-47			GO_LEUKOCYTE_MIGRATION	488	The movement of a leukocyte within or between different tissues and organs of the body. [GOC:add, ISBN:0781735149, PMID:14680625, PMID:14708592, PMID:7507411, PMID:8600538]	34	0.0697	6.25e-23	7.65e-20
GO_MITOTIC_CELL_CYCLE	1009	Progression through the phases of the mitotic cell cycle, the most common eukaryotic cell cycle, which canonically comprises four successive phases called G1, S, G2, and M and includes replication of the genome and the subsequent segregation of chromosomes into daughter cells. In some variant cell cycles nuclear replication or nuclear division may not be followed by cell division, or G1 and G2 ph…	135	0.1338	8.12e-47	8.52e-44			GO_MYELOID_LEUKOCYTE_ACTIVATION	650	A change in the morphology or behavior of a myeloid leukocyte resulting from exposure to an activating factor such as a cellular or soluble ligand. [GOC:add, ISBN:0781735149]	38	0.0585	7.7e-23	8.09e-20
GO_CELLULAR_RESPONSE_TO_DNA_DAMAGE_STIMULUS	845	Any process that results in a change in state or activity of a cell (in terms of movement, secretion, enzyme production, gene expression, etc.) as a result of a stimulus indicating damage to its DNA from environmental insults or errors during metabolism. [GOC:go_curators]	121	0.1432	4.91e-45	4.51e-42			GO_CELL_ACTIVATION_INVOLVED_IN_IMMUNE_RESPONSE	705	A change in the morphology or behavior of a cell resulting from exposure to an activating factor such as a cellular or soluble ligand, leading to the initiation or perpetuation of an immune response. [GO_REF:0000022, GOC:add, GOC:mtg_15nov05, ISBN:0781735149]	39	0.0553	1.45e-22	1.33e-19
GO_DNA_REPAIR	544	The process of restoring DNA after damage. Genomes are subject to damage by chemical and physical agents in the environment (e.g. UV and ionizing radiations, chemical mutagens, fungal and bacterial toxins, etc.) and by free radicals or alkylating agents endogenously generated in metabolism. DNA is also damaged because of errors during its replication. A variety of different DNA repair pathways ha…	95	0.1746	8.08e-43	6.59e-40			GO_CELL_MOTILITY	1719	Any process involved in the controlled self-propelled movement of a cell that results in translocation of the cell from one place to another. [GOC:dgh, GOC:dph, GOC:isa_complete, GOC:mlg]	57	0.0332	9.46e-22	7.73e-19
GO_CELL_CYCLE_PHASE_TRANSITION	621	The cell cycle process by which a cell commits to entering the next cell cycle phase. [GOC:mtg_cell_cycle]	96	0.1546	1.26e-38	9.29e-36			GO_CYTOKINE_MEDIATED_SIGNALING_PATHWAY	787	A series of molecular signals initiated by the binding of a cytokine to a receptor on the surface of a cell, and ending with regulation of a downstream cellular process, e.g. transcription. [GOC:mah, GOC:signaling, PMID:19295629]	39	0.0496	7.07e-21	4.79e-18
GO_CELL_CYCLE_DNA_REPLICATION	65	The DNA-dependent DNA replication that takes place as part of the cell cycle. [GOC:mtg_cell_cycle]	35	0.5385	1.75e-35	1.17e-32			GO_IMMUNE_EFFECTOR_PROCESS	1253	Any process of the immune system that can potentially contribute to an immune response. [GO_REF:0000022, GOC:add, GOC:mtg_15nov05, ISBN:0781735149]	48	0.0383	7.17e-21	4.79e-18
GO_DOUBLE_STRAND_BREAK_REPAIR	239	The repair of double-strand breaks in DNA via homologous and nonhomologous mechanisms to reform a continuous DNA helix. [GOC:elh]	55	0.2301	1.41e-31	8.63e-29			GO_LOCOMOTION	1943	Self-propelled movement of a cell or organism from one location to another. [GOC:dgh]	59	0.0304	1.16e-20	7.13e-18
GO_NUCLEAR_DNA_REPLICATION	55	The DNA-dependent DNA replication that occurs in the nucleus of eukaryotic organisms as part of the cell cycle. [GOC:mtg_cell_cycle]	29	0.5273	2.88e-29	1.63e-26			GO_MYELOID_LEUKOCYTE_MEDIATED_IMMUNITY	550	Any process involved in the carrying out of an immune response by a myeloid leukocyte. [GO_REF:0000022, GOC:add, GOC:mtg_15nov05, ISBN:0781735149]	32	0.0582	2.67e-19	1.4e-16
GO_REGULATION_OF_CELL_CYCLE	1212	Any process that modulates the rate or extent of progression through the cell cycle. [GOC:ai, GOC:dph, GOC:tb]	120	0.099	6.5e-29	3.41e-26			GO_POSITIVE_REGULATION_OF_PHOSPHORUS_METABOLIC_PROCESS	1084	Any process that increases the frequency, rate or extent of the chemical reactions and pathways involving phosphorus or compounds containing phosphorus. [GOC:dph, GOC:tb]	43	0.0397	2.67e-19	1.4e-16
GO_DNA_CONFORMATION_CHANGE	303	A cellular process that results in a change in the spatial configuration of a DNA molecule. A conformation change can bend DNA, or alter the, twist, writhe, or linking number of a DNA molecule. [GOC:mah]	57	0.1881	8.13e-28	3.99e-25			GO_SECRETION	1638	The controlled release of a substance by a cell or a tissue. [GOC:ai]	52	0.0317	5e-19	2.45e-16
GO_CELL_CYCLE_G1_S_PHASE_TRANSITION	293	The cell cycle process by which a cell in G1 phase commits to S phase. [GOC:mtg_cell_cycle]	56	0.1911	1.02e-27	4.71e-25			GO_REGULATION_OF_CELL_ACTIVATION	608	Any process that modulates the frequency, rate or extent of cell activation, the change in the morphology or behavior of a cell resulting from exposure to an activating factor such as a cellular or soluble ligand. [GOC:ai]	33	0.0543	5.77e-19	2.65e-16
GO_REGULATION_OF_CELL_CYCLE_PROCESS	796	Any process that modulates a cellular process that is involved in the progression of biochemical and morphological phases and events that occur in a cell during successive cell replication or nuclear replication events. [GOC:dph, GOC:tb]	92	0.1156	3.79e-27	1.64e-24			GO_EXOCYTOSIS	899	A process of secretion by a cell that results in the release of intracellular molecules (e.g. hormones, matrix proteins) contained within a membrane-bounded vesicle. Exocytosis can occur either by full fusion, when the vesicle collapses into the plasma membrane, or by a kiss-and-run mechanism that involves the formation of a transient contact, a pore, between a granule (for exemple of chromaffin …	39	0.0434	7.04e-19	3.04e-16
GO_DNA_RECOMBINATION	280	Any process in which a new genotype is formed by reassortment of genes resulting in gene combinations different from those that were present in the parents. In eukaryotes genetic recombination can occur by chromosome assortment, intrachromosomal recombination, or nonreciprocal interchromosomal recombination. Interchromosomal recombination occurs by crossing over. In bacteria it may occur by genet…	54	0.1929	5.68e-27	2.32e-24			GO_LEUKOCYTE_CHEMOTAXIS	219	The movement of a leukocyte in response to an external stimulus. [GOC:add, GOC:jl]	22	0.1005	1.39e-18	5.69e-16
GO_REGULATION_OF_MITOTIC_CELL_CYCLE	670	Any process that modulates the rate or extent of progress through the mitotic cell cycle. [GOC:dph, GOC:go_curators, GOC:tb]	81	0.1209	2.68e-25	1.04e-22			GO_REGULATION_OF_IMMUNE_SYSTEM_PROCESS	1631	Any process that modulates the frequency, rate, or extent of an immune system process. [GOC:add]	51	0.0313	2.17e-18	8.39e-16
GO_TELOMERE_ORGANIZATION	175	A process that is carried out at the cellular level which results in the assembly, arrangement of constituent parts, or disassembly of telomeres, terminal regions of a linear chromosome that include the telomeric DNA repeats and associated proteins. [GOC:dph, GOC:jl, GOC:mah]	42	0.24	3.39e-25	1.25e-22			GO_CELL_CHEMOTAXIS	300	The directed movement of a motile cell guided by a specific chemical concentration gradient. Movement may be towards a higher concentration (positive chemotaxis) or towards a lower concentration (negative chemotaxis). [GOC:dph]	24	0.08	7.4e-18	2.72e-15
GO_TELOMERE_MAINTENANCE_VIA_SEMI_CONSERVATIVE_REPLICATION	28	The process in which telomeric DNA is synthesized semi-conservatively by the conventional replication machinery and telomeric accessory factors as part of cell cycle DNA replication. [GOC:BHF, GOC:BHF_telomere, GOC:rl, GOC:vw, PMID:16598261]	19	0.6786	1.23e-22	4.31e-20			GO_LEUKOCYTE_MEDIATED_IMMUNITY	867	Any process involved in the carrying out of an immune response by a leukocyte. [GO_REF:0000022, GOC:add, GOC:mtg_15nov05, ISBN:0781735149]	37	0.0427	1.02e-17	3.56e-15
GO_DNA_REPLICATION_INITIATION	37	The process in which DNA-dependent DNA replication is started; this begins with the ATP dependent loading of an initiator complex onto the DNA, this is followed by DNA melting and helicase activity. In bacteria, the gene products that enable the helicase activity are loaded after the initial melting and in archaea and eukaryotes, the gene products that enable the helicase activity are inactive wh…	21	0.5676	1.77e-22	5.92e-20			GO_POSITIVE_REGULATION_OF_PROTEIN_METABOLIC_PROCESS	1633	Any process that activates or increases the frequency, rate or extent of the chemical reactions and pathways involving a protein. [GOC:ai]	50	0.0306	1.16e-17	3.87e-15
GO_REPRODUCTION	1459	The production of new individuals that contain some portion of genetic material inherited from one or more parent organisms. [GOC:go_curators, GOC:isa_complete, GOC:jl, ISBN:0198506732]	121	0.0829	2.09e-22	6.68e-20			GO_T_CELL_ACTIVATION	459	The change in morphology and behavior of a mature or immature T cell resulting from exposure to a mitogen, cytokine, chemokine, cellular ligand, or an antigen for which it is specific. [GOC:mgi_curators, ISBN:0781735140]	28	0.061	1.52e-17	4.87e-15
GO_CELL_CYCLE_CHECKPOINT	216	A cell cycle process that controls cell cycle progression by monitoring the integrity of specific cell cycle events. A cell cycle checkpoint begins with detection of deficiencies or defects and ends with signal transduction. [GOC:mtg_cell_cycle]	43	0.1991	2.58e-22	7.89e-20			GO_TAXIS	636	The directed movement of a motile cell or organism in response to an external stimulus. [GOC:jl, ISBN:0192801023]	32	0.0503	1.82e-17	5.56e-15
GO_REGULATION_OF_CELL_CYCLE_PHASE_TRANSITION	478	Any process that modulates the frequency, rate or extent of cell cycle phase transition. [GOC:mtg_cell_cycle, GOC:TermGenie, PMID:22841721]	62	0.1297	3.35e-21	9.86e-19			GO_POSITIVE_REGULATION_OF_PROTEIN_MODIFICATION_PROCESS	1221	Any process that activates or increases the frequency, rate or extent of the covalent alteration of one or more amino acid residues within a protein. [GOC:mah, GOC:tb]	43	0.0352	2.07e-17	6.09e-15
GO_CHROMATIN_ORGANIZATION	792	Any process that results in the specification, formation or maintenance of the physical structure of eukaryotic chromatin. [GOC:mah, GOC:vw, PMID:20404130]	81	0.1023	1.22e-20	3.45e-18			GO_POSITIVE_REGULATION_OF_INTRACELLULAR_SIGNAL_TRANSDUCTION	1011	Any process that activates or increases the frequency, rate or extent of intracellular signal transduction. [GOC:BHF, GOC:dph, GOC:signaling, GOC:tb, GOC:TermGenie]	39	0.0386	3.7e-17	1.05e-14
GO_RECOMBINATIONAL_REPAIR	127	A DNA repair process that involves the exchange, reciprocal or nonreciprocal, of genetic material between the broken DNA molecule and a homologous region of DNA. [GOC:elh]	32	0.252	3.22e-20	8.76e-18			GO_REGULATION_OF_CELL_POPULATION_PROLIFERATION	1708	Any process that modulates the frequency, rate or extent of cell proliferation. [GOC:jl]	50	0.0293	7.11e-17	1.93e-14
GO_NEGATIVE_REGULATION_OF_CELL_CYCLE	643	Any process that stops, prevents or reduces the rate or extent of progression through the cell cycle. [GOC:dph, GOC:go_curators, GOC:tb]	70	0.1089	1.85e-19	4.87e-17			GO_POSITIVE_REGULATION_OF_MAPK_CASCADE	542	Any process that activates or increases the frequency, rate or extent of signal transduction mediated by the MAPK cascade. [GOC:go_curators]	29	0.0535	1.27e-16	3.34e-14
GO_PROTEIN_DNA_COMPLEX_SUBUNIT_ORGANIZATION	281	Any process in which macromolecules aggregate, disaggregate, or are modified, resulting in the formation, disassembly, or alteration of a protein-DNA complex. [GOC:mah]	45	0.1601	2.48e-19	6.3e-17			GO_REGULATION_OF_CELL_ADHESION	684	Any process that modulates the frequency, rate or extent of attachment of a cell to another cell or to the extracellular matrix. [GOC:mah]	32	0.0468	1.45e-16	3.67e-14
GO_DNA_INTEGRITY_CHECKPOINT	158	A cell cycle process that controls cell cycle progression in response to changes in DNA structure by monitoring the integrity of the DNA. The DNA integrity checkpoint begins with detection of DNA damage, defects in DNA structure or DNA replication, and progresses through signal transduction and ends with cell cycle effector processes. [GOC:mtg_cell_cycle]	34	0.2152	4.71e-19	1.15e-16			GO_REGULATION_OF_PHOSPHORUS_METABOLIC_PROCESS	1694	Any process that modulates the frequency, rate or extent of the chemical reactions and pathways involving phosphorus or compounds containing phosphorus. [GOC:ai]	49	0.0289	2.43e-16	5.96e-14
GO_REGULATION_OF_DNA_REPLICATION	107	Any process that modulates the frequency, rate or extent of DNA replication. [GOC:go_curators]	28	0.2617	2.42e-18	5.73e-16			GO_LYMPHOCYTE_ACTIVATION	721	A change in morphology and behavior of a lymphocyte resulting from exposure to a specific antigen, mitogen, cytokine, chemokine, cellular ligand, or soluble factor. [GOC:mgi_curators, ISBN:0781735140]	32	0.0444	6.39e-16	1.52e-13
GO_MEIOTIC_CELL_CYCLE	249	Progression through the phases of the meiotic cell cycle, in which canonically a cell replicates to produce four offspring with half the chromosomal content of the progenitor cell via two nuclear divisions. [GOC:ai]	41	0.1647	3.49e-18	8.02e-16			GO_MYELOID_LEUKOCYTE_MIGRATION	203	The movement of a myeloid leukocyte within or between different tissues and organs of the body. [GOC:cvs, PMID:22342843, PMID:24157461]	19	0.0936	1.21e-15	2.79e-13
GO_NEGATIVE_REGULATION_OF_BIOSYNTHETIC_PROCESS	1631	Any process that stops, prevents, or reduces the rate of the chemical reactions and pathways resulting in the formation of substances. [GOC:go_curators]	120	0.0736	4.4e-18	9.81e-16			GO_POSITIVE_REGULATION_OF_CELL_ACTIVATION	389	Any process that activates or increases the frequency, rate or extent of activation. [GOC:ai]	24	0.0617	2.63e-15	5.86e-13
GO_NEGATIVE_REGULATION_OF_CELL_CYCLE_PROCESS	358	Any process that decreases the rate, frequency or extent of a cellular process that is involved in the progression of biochemical and morphological phases and events that occur in a cell during successive cell replication or nuclear replication events. [GOC:dph, GOC:tb]	49	0.1369	5.36e-18	1.16e-15			GO_PROTEIN_PHOSPHORYLATION	1967	The process of introducing a phosphate group on to a protein. [GOC:hb]	51	0.0259	4.36e-15	9.42e-13
GO_DNA_PACKAGING	207	Any process in which DNA and associated proteins are formed into a compact, orderly structure. [GOC:mah, ISBN:0815316194]	37	0.1787	9.3e-18	1.95e-15			GO_REGULATION_OF_PROTEIN_MODIFICATION_PROCESS	1843	Any process that modulates the frequency, rate or extent of the covalent alteration of one or more amino acid residues within a protein. [GOC:mah, GOC:tb]	49	0.0266	6.32e-15	1.33e-12
GO_MITOTIC_CELL_CYCLE_CHECKPOINT	165	A cell cycle checkpoint that ensures accurate chromosome replication and segregation by preventing progression through a mitotic cell cycle until conditions are suitable for the cell to proceed to the next stage. [GOC:mtg_cell_cycle]	33	0.2	1.63e-17	3.33e-15			GO_LEUKOCYTE_PROLIFERATION	292	The expansion of a leukocyte population by cell division. [GOC:add]	21	0.0719	7.53e-15	1.54e-12
GO_CHROMOSOME_SEGREGATION	316	The process in which genetic material, in the form of chromosomes, is organized into specific structures and then physically separated and apportioned to two or more sets. In eukaryotes, chromosome segregation begins with the condensation of chromosomes, includes chromosome separation, and ends when chromosomes have completed movement to the spindle poles. [GOC:jl, GOC:mah, GOC:mtg_cell_cycle, GO…	45	0.1424	2.64e-17	5.24e-15			GO_POSITIVE_REGULATION_OF_MULTICELLULAR_ORGANISMAL_PROCESS	1795	Any process that activates or increases the frequency, rate or extent of an organismal process, any of the processes pertinent to the function of an organism above the cellular level; includes the integrated processes of tissues and organs. [GOC:ai]	48	0.0267	1.01e-14	2e-12
GO_POSITIVE_REGULATION_OF_CELL_CYCLE_PROCESS	297	Any process that increases the rate, frequency or extent of a cellular process that is involved in the progression of biochemical and morphological phases and events that occur in a cell during successive cell replication or nuclear replication events. [GOC:dph, GOC:tb]	43	0.1448	7.25e-17	1.4e-14			GO_RESPONSE_TO_INTERFERON_GAMMA	197	Any process that results in a change in state or activity of a cell or an organism (in terms of movement, secretion, enzyme production, gene expression, etc.) as a result of an interferon-gamma stimulus. Interferon-gamma is also known as type II interferon. [GOC:add, ISBN:0126896631, PMID:15546383]	18	0.0914	1.06e-14	2.05e-12
GO_REGULATION_OF_DNA_RECOMBINATION	102	Any process that modulates the frequency, rate or extent of DNA recombination, a DNA metabolic process in which a new genotype is formed by reassortment of genes resulting in gene combinations different from those that were present in the parents. [GOC:go_curators, ISBN:0198506732]	26	0.2549	7.93e-17	1.49e-14			GO_LEUKOCYTE_CELL_CELL_ADHESION	336	The attachment of a leukocyte to another cell via adhesion molecules. [GOC:go_curators]	22	0.0655	1.17e-14	2.21e-12
GO_POSITIVE_REGULATION_OF_CELL_CYCLE	403	Any process that activates or increases the rate or extent of progression through the cell cycle. [GOC:go_curators]	50	0.1241	1.51e-16	2.78e-14			GO_CELL_CELL_ADHESION	827	The attachment of one cell to another cell via adhesion molecules. [GOC:dos]	32	0.0387	2.84e-14	5.23e-12
GO_SIGNAL_TRANSDUCTION_BY_P53_CLASS_MEDIATOR	266	An intracellular signaling process that is induced by the cell cycle regulator phosphoprotein p53 or an equivalent protein. [GOC:mah]	40	0.1504	2.31e-16	4.13e-14			GO_REGULATION_OF_LEUKOCYTE_PROLIFERATION	221	Any process that modulates the frequency, rate or extent of leukocyte proliferation. [GOC:add, GOC:mah]	18	0.0814	7.83e-14	1.4e-11
GO_NEGATIVE_REGULATION_OF_GENE_EXPRESSION_EPIGENETIC	136	Any epigenetic process that stops, prevents or reduces the rate of gene expression. [GOC:go_curators]	29	0.2132	2.4e-16	4.19e-14			GO_POSITIVE_REGULATION_OF_SIGNALING	1828	Any process that activates, maintains or increases the frequency, rate or extent of a signaling process. [GOC:mtg_signal]	47	0.0257	8.28e-14	1.45e-11
GO_RESPONSE_TO_DRUG	1018	Any process that results in a change in state or activity of a cell or an organism (in terms of movement, secretion, enzyme production, gene expression, etc.) as a result of a drug stimulus. A drug is a substance used in the diagnosis, treatment or prevention of a disease. [GOC:jl]	85	0.0835	3.58e-16	6.12e-14			GO_INNATE_IMMUNE_RESPONSE	984	Innate immune responses are defense responses mediated by germline encoded components that directly recognize components of potential pathogens. [GO_REF:0000022, GOC:add, GOC:ebc, GOC:mtg_15nov05, GOC:mtg_sensu]	34	0.0346	1.07e-13	1.83e-11
GO_ORGANELLE_FISSION	463	The creation of two or more organelles by division of one organelle. [GOC:jid]	53	0.1145	5.9e-16	9.86e-14			GO_NEUTROPHIL_MIGRATION	114	The movement of a neutrophil within or between different tissues and organs of the body. [PMID:1826836]	14	0.1228	1.67e-13	2.8e-11
GO_REGULATION_OF_DNA_DEPENDENT_DNA_REPLICATION	52	Any process that modulates the rate, frequency, or extent of DNA-dependent DNA replication, the process in which new strands of DNA are synthesized, using parental DNA as a template for the DNA-dependent DNA polymerases that synthesize the new strands. [GOC:dph, GOC:tb]	19	0.3654	6.67e-16	1.09e-13			GO_RESPONSE_TO_WOUNDING	674	Any process that results in a change in state or activity of a cell or an organism (in terms of movement, secretion, enzyme production, gene expression, etc.) as a result of a stimulus indicating damage to the organism. [GOC:go_curators]	28	0.0415	2.32e-13	3.78e-11
GO_NUCLEAR_CHROMOSOME_SEGREGATION	262	The process in which genetic material, in the form of nuclear chromosomes, is organized into specific structures and then physically separated and apportioned to two or more sets. Nuclear chromosome segregation begins with the condensation of chromosomes, includes chromosome separation, and ends when chromosomes have completed movement to the spindle poles. [GOC:dos]	39	0.1489	7.74e-16	1.24e-13			GO_REGULATION_OF_LYMPHOCYTE_ACTIVATION	478	Any process that modulates the frequency, rate or extent of lymphocyte activation. [GOC:ai]	24	0.0502	2.37e-13	3.78e-11
GO_CHROMATIN_ASSEMBLY	164	The assembly of DNA, histone proteins, other associated proteins, and sometimes RNA, into chromatin structure, beginning with the formation of the basic unit, the nucleosome, followed by organization of the nucleosomes into higher order structures, ultimately giving rise to a complex organization of specific domains within the nucleus. [http://www.infobiogen.fr/services/chromcancer/IntroItems/Chr…	31	0.189	8.17e-16	1.28e-13			GO_POSITIVE_REGULATION_OF_CELL_ADHESION	401	Any process that activates or increases the frequency, rate or extent of cell adhesion. [GOC:go_curators]	22	0.0549	4.21e-13	6.58e-11
GO_CHROMATIN_ASSEMBLY_OR_DISASSEMBLY	190	The formation or destruction of chromatin structures. [GOC:mah]	33	0.1737	1.31e-15	2e-13			GO_REGULATION_OF_INTRACELLULAR_SIGNAL_TRANSDUCTION	1846	Any process that modulates the frequency, rate or extent of intracellular signal transduction. [GOC:dph, GOC:signaling, GOC:tb, GOC:TermGenie]	46	0.0249	4.75e-13	7.28e-11
GO_CELL_CYCLE_G2_M_PHASE_TRANSITION	269	The cell cycle process by which a cell in G2 phase commits to M phase. [GOC:jl, GOC:mtg_cell_cycle]	39	0.145	1.9e-15	2.85e-13			GO_POSITIVE_REGULATION_OF_ERK1_AND_ERK2_CASCADE	212	Any process that activates or increases the frequency, rate or extent of signal transduction mediated by the ERK1 and ERK2 cascade. [GOC:mah]	17	0.0802	5.03e-13	7.54e-11
GO_PROTEIN_CONTAINING_COMPLEX_ASSEMBLY	1911	The aggregation, arrangement and bonding together of a set of macromolecules to form a protein-containing complex. [GOC:jl]	126	0.0659	2.82e-15	4.14e-13			GO_REGULATION_OF_MAPK_CASCADE	761	Any process that modulates the frequency, rate or extent of signal transduction mediated by the MAP kinase (MAPK) cascade. [GOC:go_curators]	29	0.0381	7.21e-13	1.06e-10
HEAD and NECK
UP Regulated Pathways									DN Regulated Pathways
Gene Set Name	# Genes in Gene Set (K)	Description	# Genes in Overlap (k)	k/K	p-value	FDR q-value			Gene Set Name	# Genes in Gene Set (K)	Description	# Genes in Overlap (k)	k/K	p-value	FDR q-value
GO_CELL_CYCLE	1847	The progression of biochemical and morphological phases and events that occur in a cell during successive cell replication or nuclear replication events. Canonically, the cell cycle comprises the replication and segregation of genetic material followed by the division of the cell, but in endocycles or syncytial cells nuclear replication or nuclear division may not be followed by cell division. [G…	210	0.1137	2.79e-172	2.05e-168			GO_EPIDERMIS_DEVELOPMENT	460	The process whose specific outcome is the progression of the epidermis over time, from its formation to the mature structure. The epidermis is the outer epithelial layer of an animal, it may be a single layer that produces an extracellular material (e.g. the cuticle of arthropods) or a complex stratified squamous epithelium, as in the case of many vertebrate species. [GOC:go_curators, UBERON:0001…	8	0.0174	7.61e-11	5.59e-07
GO_CELL_CYCLE_PROCESS	1383	The cellular process that ensures successive accurate and complete genome replication and chromosome segregation. [GOC:isa_complete, GOC:mtg_cell_cycle]	180	0.1302	1.87e-154	6.86e-151			GO_PEPTIDE_CROSS_LINKING	60	The formation of a covalent cross-link between or within protein chains. [GOC:jsg]	5	0.0833	1.64e-10	6.03e-07
GO_MITOTIC_CELL_CYCLE	1009	Progression through the phases of the mitotic cell cycle, the most common eukaryotic cell cycle, which canonically comprises four successive phases called G1, S, G2, and M and includes replication of the genome and the subsequent segregation of chromosomes into daughter cells. In some variant cell cycles nuclear replication or nuclear division may not be followed by cell division, or G1 and G2 ph…	153	0.1516	4.91e-139	1.2e-135			GO_CORNIFICATION	112	A type of programmed cell death that occurs in the epidermis, morphologically and biochemically distinct from apoptosis. It leads to the formation of corneocytes, i.e. dead keratinocytes containing an amalgam of specific proteins (e.g., keratin, loricrin, SPR and involucrin) and lipids (e.g., fatty acids and ceramides), which are necessary for the function of the cornified skin layer (mechanical …	5	0.0446	3.95e-09	9.69e-06
GO_CHROMOSOME_ORGANIZATION	1207	A process that is carried out at the cellular level that results in the assembly, arrangement of constituent parts, or disassembly of chromosomes, structures composed of a very long molecule of DNA and associated proteins that carries hereditary information. This term covers covalent modifications at the molecular level as well as spatial relationships among the major components of a chromosome. …	136	0.1127	2.79e-104	5.13e-101			GO_EPIDERMAL_CELL_DIFFERENTIATION	352	The process in which a relatively unspecialized cell acquires specialized features of an epidermal cell, any of the cells making up the epidermis. [GOC:dph, GOC:go_curators, GOC:mtg_sensu, GOC:sdb_2009, GOC:tb]	6	0.017	2.9e-08	5.32e-05
GO_DNA_METABOLIC_PROCESS	850	Any cellular metabolic process involving deoxyribonucleic acid. This is one of the two main types of nucleic acid, consisting of a long, unbranched macromolecule formed from one, or more commonly, two, strands of linked deoxyribonucleotides. [ISBN:0198506732]	119	0.14	1.54e-101	2.27e-98			GO_SKIN_DEVELOPMENT	414	The process whose specific outcome is the progression of the skin over time, from its formation to the mature structure. The skin is the external membranous integument of an animal. In vertebrates the skin generally consists of two layers, an outer nonsensitive and nonvascular epidermis (cuticle or skarfskin) composed of cells which are constantly growing and multiplying in the deeper, and being …	6	0.0145	7.56e-08	0.000111
GO_DNA_REPLICATION	272	The cellular metabolic process in which a cell duplicates one or more molecules of DNA. DNA replication begins when specific sequences, known as origins of replication, are recognized and bound by initiation proteins, and ends when the original DNA molecule has been completely duplicated and the copies topologically separated. The unit of replication usually corresponds to the genome of the cell,…	81	0.2978	1.6e-96	1.96e-93			GO_KERATINIZATION	223	The process in which the cytoplasm of the outermost cells of the vertebrate epidermis is replaced by keratin. Keratinization occurs in the stratum corneum, feathers, hair, claws, nails, hooves, and horns. [GOC:dph, GOC:ebc, GOC:sdb_2009, GOC:tb]	5	0.0224	1.25e-07	0.000153
GO_CELL_CYCLE_PHASE_TRANSITION	621	The cell cycle process by which a cell commits to entering the next cell cycle phase. [GOC:mtg_cell_cycle]	97	0.1562	1.61e-86	1.69e-83			GO_EPITHELIAL_CELL_DIFFERENTIATION	767	The process in which a relatively unspecialized cell acquires specialized features of an epithelial cell, any of the cells making up an epithelium. [GOC:ecd, PMID:11839751]	6	0.0078	2.75e-06	0.00289
GO_CELLULAR_RESPONSE_TO_DNA_DAMAGE_STIMULUS	845	Any process that results in a change in state or activity of a cell (in terms of movement, secretion, enzyme production, gene expression, etc.) as a result of a stimulus indicating damage to its DNA from environmental insults or errors during metabolism. [GOC:go_curators]	106	0.1254	1.23e-84	1.13e-81			GO_RESPONSE_TO_BACTERIUM	681	Any process that results in a change in state or activity of a cell or an organism (in terms of movement, secretion, enzyme production, gene expression, etc.) as a result of a stimulus from a bacterium. [GOC:hb]	5	0.0073	2.9e-05	0.0267
GO_CELL_DIVISION	593	The process resulting in division and partitioning of components of a cell to form more cells; may or may not be accompanied by the physical separation of a cell into distinct, individually membrane-bounded daughter cells. [GOC:di, GOC:go_curators, GOC:pr]	93	0.1568	5.74e-83	4.69e-80			GO_EPITHELIUM_DEVELOPMENT	1278	The process whose specific outcome is the progression of an epithelium over time, from its formation to the mature structure. An epithelium is a tissue that covers the internal or external surfaces of an anatomical structure. [GOC:dph, GOC:mtg_lung]	6	0.0047	4.99e-05	0.0407
GO_REGULATION_OF_CELL_CYCLE	1212	Any process that modulates the rate or extent of progression through the cell cycle. [GOC:ai, GOC:dph, GOC:tb]	118	0.0974	5.71e-82	4.2e-79			GO_GRANULOCYTE_MIGRATION	136	The movement of a granulocyte within or between different tissues and organs of the body. [GOC:cvs, PMID:24163421, PMID:24193336]	3	0.0221	5.66e-05	0.0416
GO_ORGANELLE_FISSION	463	The creation of two or more organelles by division of one organelle. [GOC:jid]	85	0.1836	1.14e-81	7.6e-79
GO_CHROMOSOME_SEGREGATION	316	The process in which genetic material, in the form of chromosomes, is organized into specific structures and then physically separated and apportioned to two or more sets. In eukaryotes, chromosome segregation begins with the condensation of chromosomes, includes chromosome separation, and ends when chromosomes have completed movement to the spindle poles. [GOC:jl, GOC:mah, GOC:mtg_cell_cycle, GO…	75	0.2373	7.23e-81	4.43e-78
GO_DNA_DEPENDENT_DNA_REPLICATION	147	A DNA replication process that uses parental DNA as a template for the DNA-dependent DNA polymerases that synthesize the new strands. [GOC:mah, ISBN:0198506732]	59	0.4014	3.71e-79	2.1e-76
GO_DNA_REPAIR	544	The process of restoring DNA after damage. Genomes are subject to damage by chemical and physical agents in the environment (e.g. UV and ionizing radiations, chemical mutagens, fungal and bacterial toxins, etc.) and by free radicals or alkylating agents endogenously generated in metabolism. DNA is also damaged because of errors during its replication. A variety of different DNA repair pathways ha…	84	0.1544	4.55e-74	2.39e-71
GO_REGULATION_OF_CELL_CYCLE_PROCESS	796	Any process that modulates a cellular process that is involved in the progression of biochemical and morphological phases and events that occur in a cell during successive cell replication or nuclear replication events. [GOC:dph, GOC:tb]	94	0.1181	4.16e-72	2.04e-69
GO_NUCLEAR_CHROMOSOME_SEGREGATION	262	The process in which genetic material, in the form of nuclear chromosomes, is organized into specific structures and then physically separated and apportioned to two or more sets. Nuclear chromosome segregation begins with the condensation of chromosomes, includes chromosome separation, and ends when chromosomes have completed movement to the spindle poles. [GOC:dos]	65	0.2481	2.6e-71	1.19e-68
GO_MITOTIC_NUCLEAR_DIVISION	282	A mitotic cell cycle process comprising the steps by which the nucleus of a eukaryotic cell divides; the process involves condensation of chromosomal DNA into a highly compacted form. Canonically, mitosis produces two daughter nuclei whose chromosome complement is identical to that of the mother cell. [ISBN:0198547684]	66	0.234	1.43e-70	6.18e-68
GO_SISTER_CHROMATID_SEGREGATION	189	The cell cycle process in which sister chromatids are organized and then physically separated and apportioned to two or more sets. [GOC:ai, GOC:elh]	56	0.2963	2.89e-66	1.18e-63
GO_REGULATION_OF_MITOTIC_CELL_CYCLE	670	Any process that modulates the rate or extent of progress through the mitotic cell cycle. [GOC:dph, GOC:go_curators, GOC:tb]	82	0.1224	7.87e-64	3.04e-61
GO_MITOTIC_SISTER_CHROMATID_SEGREGATION	151	The cell cycle process in which replicated homologous chromosomes are organized and then physically separated and apportioned to two sets during the mitotic cell cycle. Each replicated chromosome, composed of two sister chromatids, aligns at the cell equator, paired with its homologous partner. One homolog of each morphologic type goes into each of the resulting chromosome sets. [GOC:ai, GOC:jl]	48	0.3179	1.63e-58	5.99e-56
GO_CELL_CYCLE_CHECKPOINT	216	A cell cycle process that controls cell cycle progression by monitoring the integrity of specific cell cycle events. A cell cycle checkpoint begins with detection of deficiencies or defects and ends with signal transduction. [GOC:mtg_cell_cycle]	50	0.2315	3.82e-53	1.34e-50
GO_REGULATION_OF_CELL_CYCLE_PHASE_TRANSITION	478	Any process that modulates the frequency, rate or extent of cell cycle phase transition. [GOC:mtg_cell_cycle, GOC:TermGenie, PMID:22841721]	64	0.1339	4.61e-52	1.54e-49
GO_DNA_CONFORMATION_CHANGE	303	A cellular process that results in a change in the spatial configuration of a DNA molecule. A conformation change can bend DNA, or alter the, twist, writhe, or linking number of a DNA molecule. [GOC:mah]	51	0.1683	1.16e-46	3.7e-44
GO_MITOTIC_CELL_CYCLE_CHECKPOINT	165	A cell cycle checkpoint that ensures accurate chromosome replication and segregation by preventing progression through a mitotic cell cycle until conditions are suitable for the cell to proceed to the next stage. [GOC:mtg_cell_cycle]	42	0.2545	1.25e-46	3.82e-44
GO_NEGATIVE_REGULATION_OF_CELL_CYCLE	643	Any process that stops, prevents or reduces the rate or extent of progression through the cell cycle. [GOC:dph, GOC:go_curators, GOC:tb]	66	0.1026	3.73e-46	1.1e-43
GO_DOUBLE_STRAND_BREAK_REPAIR	239	The repair of double-strand breaks in DNA via homologous and nonhomologous mechanisms to reform a continuous DNA helix. [GOC:elh]	46	0.1925	6.09e-45	1.72e-42
GO_CELL_CYCLE_DNA_REPLICATION	65	The DNA-dependent DNA replication that takes place as part of the cell cycle. [GOC:mtg_cell_cycle]	31	0.4769	8.16e-45	2.22e-42
GO_CELL_CYCLE_G1_S_PHASE_TRANSITION	293	The cell cycle process by which a cell in G1 phase commits to S phase. [GOC:mtg_cell_cycle]	48	0.1638	2.38e-43	6.24e-41
GO_NEGATIVE_REGULATION_OF_MITOTIC_CELL_CYCLE	335	Any process that stops, prevents or reduces the rate or extent of progression through the mitotic cell cycle. [GOC:dph, GOC:go_curators, GOC:tb]	49	0.1463	9.15e-42	2.32e-39
GO_DNA_RECOMBINATION	280	Any process in which a new genotype is formed by reassortment of genes resulting in gene combinations different from those that were present in the parents. In eukaryotes genetic recombination can occur by chromosome assortment, intrachromosomal recombination, or nonreciprocal interchromosomal recombination. Interchromosomal recombination occurs by crossing over. In bacteria it may occur by genet…	46	0.1643	1.27e-41	3.12e-39
GO_CELL_CYCLE_G2_M_PHASE_TRANSITION	269	The cell cycle process by which a cell in G2 phase commits to M phase. [GOC:jl, GOC:mtg_cell_cycle]	45	0.1673	4.27e-41	1.01e-38
GO_POSITIVE_REGULATION_OF_CELL_CYCLE_PROCESS	297	Any process that increases the rate, frequency or extent of a cellular process that is involved in the progression of biochemical and morphological phases and events that occur in a cell during successive cell replication or nuclear replication events. [GOC:dph, GOC:tb]	46	0.1549	2.09e-40	4.8e-38
GO_POSITIVE_REGULATION_OF_CELL_CYCLE	403	Any process that activates or increases the rate or extent of progression through the cell cycle. [GOC:go_curators]	51	0.1266	3.23e-40	7.19e-38
GO_MEIOTIC_CELL_CYCLE	249	Progression through the phases of the meiotic cell cycle, in which canonically a cell replicates to produce four offspring with half the chromosomal content of the progenitor cell via two nuclear divisions. [GOC:ai]	43	0.1727	6.48e-40	1.4e-37
GO_NUCLEAR_DNA_REPLICATION	55	The DNA-dependent DNA replication that occurs in the nucleus of eukaryotic organisms as part of the cell cycle. [GOC:mtg_cell_cycle]	27	0.4909	1.3e-39	2.72e-37
GO_MICROTUBULE_CYTOSKELETON_ORGANIZATION	535	A process that is carried out at the cellular level which results in the assembly, arrangement of constituent parts, or disassembly of cytoskeletal structures comprising microtubules and their associated proteins. [GOC:mah]	55	0.1028	1.82e-38	3.72e-36
GO_MICROTUBULE_BASED_PROCESS	734	Any cellular process that depends upon or alters the microtubule cytoskeleton, that part of the cytoskeleton comprising microtubules and their associated proteins. [GOC:mah]	62	0.0845	2.65e-38	5.27e-36
GO_MEIOTIC_CELL_CYCLE_PROCESS	187	A process that is part of the meiotic cell cycle. [GO_REF:0000060, GOC:mtg_cell_cycle, GOC:TermGenie]	38	0.2032	3.37e-38	6.51e-36
GO_REGULATION_OF_CHROMOSOME_SEGREGATION	103	Any process that modulates the frequency, rate or extent of chromosome segregation, the process in which genetic material, in the form of chromosomes, is organized and then physically separated and apportioned to two or more sets. [GOC:ai]	31	0.301	3.36e-37	6.33e-35
GO_DNA_INTEGRITY_CHECKPOINT	158	A cell cycle process that controls cell cycle progression in response to changes in DNA structure by monitoring the integrity of the DNA. The DNA integrity checkpoint begins with detection of DNA damage, defects in DNA structure or DNA replication, and progresses through signal transduction and ends with cell cycle effector processes. [GOC:mtg_cell_cycle]	35	0.2215	1.15e-36	2.11e-34
GO_NEGATIVE_REGULATION_OF_CELL_CYCLE_PROCESS	358	Any process that decreases the rate, frequency or extent of a cellular process that is involved in the progression of biochemical and morphological phases and events that occur in a cell during successive cell replication or nuclear replication events. [GOC:dph, GOC:tb]	46	0.1285	1.28e-36	2.28e-34
GO_REGULATION_OF_DNA_REPLICATION	107	Any process that modulates the frequency, rate or extent of DNA replication. [GOC:go_curators]	31	0.2897	1.3e-36	2.28e-34
GO_NEGATIVE_REGULATION_OF_CELL_CYCLE_PHASE_TRANSITION	265	Any process that stops, prevents or reduces the frequency, rate or extent of cell cycle phase transition. [GOC:mtg_cell_cycle, GOC:TermGenie, PMID:22841721]	41	0.1547	4.6e-36	7.87e-34
GO_REGULATION_OF_CELL_CYCLE_G2_M_PHASE_TRANSITION	215	Any signalling pathway that modulates the activity of a cell cycle cyclin-dependent protein kinase to modulate the switch from G2 phase to M phase of the cell cycle. [GO_REF:0000058, GOC:jl, GOC:TermGenie]	37	0.1721	2.15e-34	3.59e-32
GO_REGULATION_OF_NUCLEAR_DIVISION	207	Any process that modulates the frequency, rate or extent of nuclear division, the partitioning of the nucleus and its genetic information. [GOC:ai]	36	0.1739	1.16e-33	1.9e-31
GO_SPINDLE_ORGANIZATION	168	A process that is carried out at the cellular level which results in the assembly, arrangement of constituent parts, or disassembly of the spindle, the array of microtubules and associated molecules that forms between opposite poles of a eukaryotic cell during DNA segregation and serves to move the duplicated chromosomes apart. [GOC:go_curators, GOC:mah]	33	0.1964	8.94e-33	1.43e-30
GO_RECOMBINATIONAL_REPAIR	127	A DNA repair process that involves the exchange, reciprocal or nonreciprocal, of genetic material between the broken DNA molecule and a homologous region of DNA. [GOC:elh]	30	0.2362	1.74e-32	2.71e-30
GO_DNA_PACKAGING	207	Any process in which DNA and associated proteins are formed into a compact, orderly structure. [GOC:mah, ISBN:0815316194]	35	0.1691	2.63e-32	4.03e-30
GO_CHROMOSOME_SEPARATION	90	The cell cycle process in which paired chromosomes are detached from each other. Chromosome separation begins with the release of cohesin complexes from chromosomes; in budding yeast, this includes the cleavage of cohesin complexes along the chromosome arms, followed by the separation of the centromeric regions. Chromosome separation also includes formation of chromatid axes mediated by condensin…	26	0.2889	7.58e-31	1.14e-28
GO_DNA_REPLICATION_INITIATION	37	The process in which DNA-dependent DNA replication is started; this begins with the ATP dependent loading of an initiator complex onto the DNA, this is followed by DNA melting and helicase activity. In bacteria, the gene products that enable the helicase activity are loaded after the initial melting and in archaea and eukaryotes, the gene products that enable the helicase activity are inactive wh…	20	0.5405	8.91e-31	1.31e-28
